# Supplementary material for: Lifelong dietary interventions remodel age-associated circulating microRNA landscape linking metabolism, neurogenesis, and breast cancer susceptibility
Source: Research Square preprint supplement (doi:10.21203/rs.3.rs-8637039/v1), 2026-02-16
Supplement: Supplementary file 1 [file cda02604188a7494a1fd0a74.xlsx]

## Sheet: Blood_50_CCR_vs_AL
Accession	Transcript.ID.Array.Design.	Sequence.Type	logFC	AveExpr	t	P.Value	adj.P.Val
MIMAT0024861	mmu-miR-6240	miRNA	3.83444	5.40663	2.25076	0.0308683	0.866375
MIMAT0003499	mmu-miR-709	miRNA	3.79132	6.63719	2.36894	0.0235629	0.771982
MIMAT0003182	mmu-miR-494-3p	miRNA	3.50037	2.4035	5.41779	4.7e-06	0.00895289
MIMAT0025583	mmu-miR-6538	miRNA	1.97036	8.67707	2.34534	0.0248825	0.791265
MIMAT0005856	mmu-miR-1195	miRNA	1.77194	1.94855	2.415	0.0211676	0.734323
MIMAT0000161	mmu-miR-151-3p	miRNA	1.23678	2.52288	1.22497	0.228869	0.989147
MIMAT0024860	mmu-miR-6239	miRNA	1.1859	2.24119	1.5632	0.127116	0.989147
MIMAT0000565	mmu-miR-328-3p	miRNA	1.04878	4.43358	0.602144	0.551009	0.989147
MIMAT0024859	mmu-miR-6238	miRNA	1.0282	1.44489	1.78687	0.0827318	0.978695
MIMAT0028129	mmu-miR-7116-5p	miRNA	0.911339	4.77427	0.493373	0.624869	0.989147
MIMAT0020639	mmu-miR-5128	miRNA	0.869721	6.59781	0.756676	0.454371	0.989147
MIMAT0003496	mmu-miR-706	miRNA	0.847134	3.42228	0.549233	0.586377	0.989147
MIMAT0009458	mmu-miR-1981-5p	miRNA	0.779904	3.3521	0.755364	0.455148	0.989147
MIMAT0025124	mmu-miR-6378	miRNA	0.764659	0.924718	1.61145	0.116178	0.989147
MIMAT0005859	mmu-miR-1198-5p	miRNA	0.718482	2.94937	0.647141	0.521816	0.989147
MIMAT0027712	mmu-miR-6906-5p	miRNA	0.70314	5.82917	0.546232	0.588415	0.989147
MIMAT0000384	mmu-let-7d-3p	miRNA	0.693555	0.726932	1.39716	0.17127	0.989147
MIMAT0029878	mmu-miR-3620-5p	miRNA	0.69227	5.08942	0.449572	0.655826	0.989147
MIMAT0000210	mmu-miR-181a-5p	miRNA	0.678565	2.69817	0.632844	0.531001	0.989147
MIMAT0029799	mmu-miR-7648-3p	miRNA	0.648619	5.71634	0.443817	0.659941	0.989147
MIMAT0004662	mmu-miR-139-3p	miRNA	0.647777	1.01661	2.31294	0.026804	0.799215
MIMAT0027876	mmu-miR-6987-5p	miRNA	0.635304	1.29926	1.86883	0.0701412	0.960317
MIMAT0027728	mmu-miR-6914-5p	miRNA	0.601005	2.61885	0.565474	0.575404	0.989147
MIMAT0020615	mmu-miR-5107-5p	miRNA	0.595234	1.29326	1.30527	0.200424	0.989147
MIMAT0027806	mmu-miR-6953-5p	miRNA	0.593426	2.28577	0.856814	0.39745	0.989147
MIMAT0027992	mmu-miR-7044-5p	miRNA	0.584119	5.44693	0.429842	0.669978	0.989147
MIMAT0027937	mmu-miR-7016-3p	miRNA	0.567498	0.452855	2.78531	0.00861894	0.65952
MIMAT0027850	mmu-miR-6974-5p	miRNA	0.563071	0.808286	2.24271	0.0314333	0.866375
MIMAT0027762	mmu-miR-6931-5p	miRNA	0.539464	2.71064	0.509702	0.6135	0.989147
MIMAT0004893	mmu-miR-574-5p	miRNA	0.537519	1.71445	0.99399	0.327136	0.989147
MIMAT0016996	mmu-miR-185-3p	miRNA	0.528559	0.921708	1.29818	0.202823	0.989147
MIMAT0022368	mmu-miR-5620-3p	miRNA	0.504917	1.09172	1.82992	0.0758983	0.978695
MIMAT0028010	mmu-miR-7053-5p	miRNA	0.495967	2.83274	0.52047	0.606055	0.989147
MIMAT0027996	mmu-miR-7046-5p	miRNA	0.489249	1.29149	0.908393	0.369961	0.989147
MIMAT0000124	mmu-miR-15b-5p	miRNA	0.488148	5.60219	0.257246	0.798514	0.989147
MIMAT0022931	mmu-miR-702-5p	miRNA	0.463802	1.1156	1.17031	0.249884	0.989147
MIMAT0003454	mmu-miR-423-3p	miRNA	0.463022	2.79428	0.43258	0.668007	0.989147
MIMAT0025161	mmu-miR-6408	miRNA	0.455004	0.624305	2.54006	0.0157391	0.727368
MIMAT0004540	mmu-miR-186-3p	miRNA	0.454925	0.581992	2.55973	0.0150122	0.727368
MIMAT0014815	mmu-miR-3099-5p	miRNA	0.428639	0.408165	2.46201	0.0189531	0.734323
MIMAT0009405	mmu-miR-1941-5p	miRNA	0.428101	1.90547	0.742503	0.4628	0.989147
MIMAT0000597	mmu-miR-346-5p	miRNA	0.422848	0.71136	2.71376	0.0103028	0.65952
MIMAT0004746	mmu-miR-409-5p	miRNA	0.410557	0.79104	1.77629	0.0844898	0.978695
MIMAT0004619	mmu-miR-200a-5p	miRNA	0.406837	0.521871	2.36331	0.0238716	0.771982
MIMAT0025585	mmu-miR-6540-5p	miRNA	0.403459	0.706272	2.44983	0.0195059	0.734323
MIMAT0004882	mmu-miR-466f-3p	miRNA	0.402758	0.280644	2.6289	0.0126941	0.697192
MIMAT0014921	mmu-miR-3101-5p	miRNA	0.398508	0.70603	1.91603	0.0636623	0.946763
MIMAT0027954	mmu-miR-7025-5p	miRNA	0.397877	3.79986	0.367937	0.715164	0.989147
MIMAT0020645	mmu-miR-5134-5p	miRNA	0.394738	1.09044	0.887873	0.380747	0.989147
MIMAT0027843	mmu-miR-6970-3p	miRNA	0.39232	0.38257	2.87719	0.00683211	0.65952
MIMAT0004782	mmu-miR-483-5p	miRNA	0.388623	0.564699	2.78996	0.00851886	0.65952
MIMAT0028444	mmu-miR-7238-5p	miRNA	0.382999	3.29508	0.441263	0.661771	0.989147
MIMAT0028037	mmu-miR-7066-3p	miRNA	0.379213	0.603747	2.49108	0.0176918	0.733824
MIMAT0025135	mmu-miR-6388	miRNA	0.372865	1.17719	1.11872	0.270974	0.989147
MIMAT0014835	mmu-miR-3064-3p	miRNA	0.372215	0.526542	2.38856	0.0225139	0.767079
MIMAT0027924	mmu-miR-7010-5p	miRNA	0.360269	0.755344	1.93458	0.0612609	0.944365
MIMAT0028070	mmu-miR-7082-5p	miRNA	0.353892	2.02736	0.444996	0.659098	0.989147
MIMAT0003465	mmu-miR-719	miRNA	0.348506	0.796703	1.24532	0.22139	0.989147
MIMAT0017049	mmu-miR-25-5p	miRNA	0.347924	2.29443	0.37939	0.706719	0.989147
MIMAT0027773	mmu-miR-6936-3p	miRNA	0.336847	0.643764	1.93127	0.0616837	0.944365
MIMAT0027830	mmu-miR-6965-5p	miRNA	0.336034	0.868206	2.00883	0.0524174	0.944365
MIMAT0027801	mmu-miR-6950-3p	miRNA	0.329862	0.629489	1.96596	0.0573769	0.944365
MIMAT0003120	mmu-miR-483-3p	miRNA	0.328495	0.56962	1.20802	0.235241	0.989147
MIMAT0028048	mmu-miR-7071-5p	miRNA	0.326502	0.790916	1.15886	0.254459	0.989147
MIMAT0003514	mmu-miR-718	miRNA	0.321997	0.557844	2.03939	0.0491149	0.944365
MIMAT0014801	mmu-miR-1247-3p	miRNA	0.316861	1.29442	0.698527	0.489521	0.989147
MIMAT0017020	mmu-miR-26a-1-3p	miRNA	0.314587	0.697489	1.67734	0.102498	0.989147
MIMAT0029794	mmu-miR-7646-5p	miRNA	0.313912	0.257422	2.10846	0.0423133	0.944365
MIMAT0000149	mmu-miR-137-3p	miRNA	0.311264	0.47146	2.37931	0.0230032	0.770002
MIMAT0007866	mmu-miR-1905	miRNA	0.309972	1.02112	1.13016	0.266191	0.989147
MIMAT0017210	mmu-miR-547-5p	miRNA	0.306913	0.39591	2.31287	0.026808	0.799215
MIMAT0027955	mmu-miR-7025-3p	miRNA	0.306651	0.75558	1.45452	0.154824	0.989147
MIMAT0022386	mmu-miR-5627-3p	miRNA	0.303236	0.259355	2.53205	0.0160443	0.727368
MIMAT0017063	mmu-miR-29b-2-5p	miRNA	0.301846	0.704606	1.88794	0.0674529	0.953334
MIMAT0004528	mmu-miR-125a-3p	miRNA	0.301776	0.266898	2.75454	0.00930896	0.65952
MIMAT0001094	mmu-miR-412-3p	miRNA	0.300909	0.172436	2.50467	0.017129	0.727368
MIMAT0014853	mmu-miR-3072-3p	miRNA	0.297274	0.739936	1.68253	0.10148	0.989147
MIMAT0014950	mmu-miR-3109-3p	miRNA	0.295677	0.648622	2.21051	0.0337865	0.875091
MIMAT0027765	mmu-miR-6932-3p	miRNA	0.293374	0.535807	1.84684	0.0733462	0.978633
MIMAT0014876	mmu-miR-3084-5p	miRNA	0.291466	0.60085	1.69935	0.0982389	0.989147
MIMAT0004879	mmu-miR-466e-5p	miRNA	0.286505	0.382799	2.33532	0.0254632	0.796455
MIMAT0005848	mmu-miR-466j	miRNA	0.284727	0.735719	1.30101	0.201863	0.989147
MIMAT0027896	mmu-miR-6997-5p	miRNA	0.283982	0.486565	1.77845	0.0841278	0.978695
MIMAT0002112	mmu-miR-471-5p	miRNA	0.280732	0.22246	2.72349	0.010057	0.65952
MIMAT0017040	mmu-miR-350-5p	miRNA	0.280521	0.532453	2.23776	0.0317852	0.866375
MIMAT0017255	mmu-miR-491-3p	miRNA	0.280298	0.151284	2.91978	0.00612743	0.65952
MIMAT0014871	mmu-miR-3081-3p	miRNA	0.279927	0.522984	2.0982	0.0432686	0.944365
MIMAT0017261	mmu-miR-490-5p	miRNA	0.279898	0.401115	2.13003	0.0403674	0.939281
MIMAT0017069	mmu-miR-128-2-5p	miRNA	0.279894	0.855701	1.33758	0.189769	0.989147
MIMAT0017015	mmu-let-7a-2-3p	miRNA	0.279806	0.375724	2.17142	0.0368524	0.913173
MIMAT0022952	mmu-miR-1966-3p	miRNA	0.279562	0.420631	1.77102	0.0853772	0.978695
MIMAT0005830	mmu-miR-466l-3p	miRNA	0.278255	0.712605	1.57048	0.125415	0.989147
MIMAT0022357	mmu-miR-1231-5p	miRNA	0.274513	0.637189	1.41088	0.167219	0.989147
MIMAT0029859	mmu-miR-7675-3p	miRNA	0.273542	0.429416	1.41461	0.166128	0.989147
MIMAT0014898	mmu-miR-3088-3p	miRNA	0.270248	0.217413	2.73052	0.00988302	0.65952
MIMAT0014861	mmu-miR-3076-3p	miRNA	0.26922	0.461795	2.08067	0.0449434	0.944365
MIMAT0028077	mmu-miR-7085-3p	miRNA	0.26899	0.682186	1.62097	0.114112	0.989147
MIMAT0028393	mmu-miR-7212-3p	miRNA	0.267348	0.485736	2.19564	0.0349252	0.876807
MIMAT0027975	mmu-miR-7035-3p	miRNA	0.266554	0.176684	2.4276	0.0205522	0.734323
MIMAT0027934	mmu-miR-7015-5p	miRNA	0.26532	0.311251	2.15507	0.0382074	0.931064
MIMAT0003486	mmu-miR-491-5p	miRNA	0.261365	0.768263	0.944201	0.351621	0.989147
MIMAT0027928	mmu-miR-7012-5p	miRNA	0.259162	1.30269	0.992555	0.327825	0.989147
MIMAT0027759	mmu-miR-6929-3p	miRNA	0.257495	0.5675	1.46086	0.153086	0.989147
MIMAT0014875	mmu-miR-3083-3p	miRNA	0.257467	0.522028	1.71251	0.0957628	0.978695
MIMAT0004520	mmu-let-7i-3p	miRNA	0.25711	0.635916	1.4819	0.147428	0.989147
MIMAT0004633	mmu-miR-27a-5p	miRNA	0.257026	0.716192	1.71311	0.0956499	0.978695
MIMAT0020607	mmu-miR-5100	miRNA	0.256922	2.27828	0.2459	0.807214	0.989147
MIMAT0009392	mmu-miR-1929-5p	miRNA	0.256006	0.763291	1.37541	0.177854	0.989147
MIMAT0028424	mmu-miR-7228-5p	miRNA	0.255193	0.132565	1.93829	0.0607906	0.944365
MIMAT0027754	mmu-miR-6927-5p	miRNA	0.255142	0.990572	0.899074	0.374834	0.989147
MIMAT0029805	mmu-miR-7651-3p	miRNA	0.254514	0.798869	1.6478	0.108457	0.989147
MIMAT0000766	mmu-miR-335-5p	miRNA	0.25322	0.99355	0.394059	0.695958	0.989147
MIMAT0003781	mmu-miR-676-5p	miRNA	0.251966	0.592751	1.73045	0.0924713	0.978695
MIMAT0017009	mmu-miR-106a-3p	miRNA	0.250801	0.55627	1.98682	0.0549158	0.944365
MIMAT0004623	mmu-let-7f-1-3p	miRNA	0.250569	0.506339	2.11172	0.0420138	0.944365
MIMAT0029860	mmu-miR-7676-5p	miRNA	0.250566	0.571032	1.53596	0.133652	0.989147
MIMAT0004823	mmu-miR-666-3p	miRNA	0.250378	0.262942	2.02755	0.0503719	0.944365
MIMAT0017000	mmu-miR-195a-3p	miRNA	0.250248	0.947959	1.22205	0.229958	0.989147
MIMAT0031423	mmu-miR-8117	miRNA	0.248549	0.671848	1.63002	0.112179	0.989147
MIMAT0000708	mmu-miR-363-3p	miRNA	0.248483	0.605448	1.63802	0.110492	0.989147
MIMAT0017064	mmu-miR-135a-2-3p	miRNA	0.24467	0.661215	1.36949	0.179681	0.989147
MIMAT0027821	mmu-miR-6960-3p	miRNA	0.241921	0.614676	1.77299	0.0850448	0.978695
MIMAT0027857	mmu-miR-6977-3p	miRNA	0.240874	0.407779	1.99356	0.0541397	0.944365
MIMAT0010560	mmu-miR-1249-3p	miRNA	0.240832	0.858853	1.25311	0.218578	0.989147
MIMAT0029895	mmu-miR-126b-3p	miRNA	0.240511	0.597347	1.30646	0.200024	0.989147
MIMAT0000519	mmu-miR-200a-3p	miRNA	0.23945	0.660558	1.41525	0.165942	0.989147
MIMAT0004573	mmu-miR-293-5p	miRNA	0.239447	0.312811	2.25852	0.0303328	0.866375
MIMAT0025156	mmu-miR-6404	miRNA	0.239076	0.437402	1.87241	0.0696295	0.960317
MIMAT0028000	mmu-miR-7048-5p	miRNA	0.238895	1.01675	0.606435	0.548189	0.989147
MIMAT0029828	mmu-miR-7661-5p	miRNA	0.237102	0.406799	1.43647	0.159858	0.989147
MIMAT0003482	mmu-miR-499-5p	miRNA	0.235815	0.468849	1.60771	0.116997	0.989147
MIMAT0014833	mmu-miR-3063-3p	miRNA	0.235611	0.582605	1.42393	0.163434	0.989147
MIMAT0027816	mmu-miR-6958-5p	miRNA	0.232611	0.578703	1.49259	0.144617	0.989147
MIMAT0000555	mmu-miR-324-5p	miRNA	0.23159	1.27604	0.418823	0.677937	0.989147
MIMAT0029844	mmu-miR-7669-5p	miRNA	0.229854	0.71897	1.52636	0.13602	0.989147
MIMAT0027740	mmu-miR-6920-5p	miRNA	0.229642	0.435015	1.75172	0.0886923	0.978695
MIMAT0027831	mmu-miR-6965-3p	miRNA	0.229528	0.324039	1.95845	0.0582864	0.944365
MIMAT0014903	mmu-miR-3091-5p	miRNA	0.22938	1.38855	0.618269	0.540452	0.989147
MIMAT0028414	mmu-miR-7223-5p	miRNA	0.228397	0.302749	1.72233	0.0939483	0.978695
MIMAT0028068	mmu-miR-7081-5p	miRNA	0.226323	2.09642	0.369709	0.713855	0.989147
MIMAT0028039	mmu-miR-7067-3p	miRNA	0.225984	0.528713	1.54801	0.13073	0.989147
MIMAT0004851	mmu-miR-883b-3p	miRNA	0.225171	0.40218	1.4337	0.160645	0.989147
MIMAT0004847	mmu-miR-882	miRNA	0.224244	0.384276	1.9497	0.0593623	0.944365
MIMAT0004572	mmu-miR-290a-3p	miRNA	0.220109	0.541113	1.67687	0.102591	0.989147
MIMAT0014831	mmu-miR-3062-3p	miRNA	0.219961	0.200636	1.86658	0.0704635	0.960317
MIMAT0029578	mmu-miR-7578	miRNA	0.219838	0.404328	1.49695	0.143483	0.989147
MIMAT0027781	mmu-miR-6940-3p	miRNA	0.21971	0.605942	1.68307	0.101375	0.989147
MIMAT0003734	mmu-miR-667-3p	miRNA	0.219366	0.852809	1.12591	0.267962	0.989147
MIMAT0003476	mmu-miR-669b-5p	miRNA	0.219158	0.63814	1.48319	0.147087	0.989147
MIMAT0020643	mmu-miR-5132-5p	miRNA	0.218788	1.47945	0.34973	0.728664	0.989147
MIMAT0027755	mmu-miR-6927-3p	miRNA	0.218707	0.684723	1.1738	0.248501	0.989147
MIMAT0000549	mmu-miR-322-3p	miRNA	0.218599	0.510351	1.5939	0.120064	0.989147
MIMAT0017039	mmu-miR-346-3p	miRNA	0.218232	6.62506	0.167361	0.868062	0.99088
MIMAT0005444	mmu-miR-218-2-3p	miRNA	0.218029	0.555359	1.83198	0.075584	0.978695
MIMAT0028038	mmu-miR-7067-5p	miRNA	0.217725	0.840581	0.710749	0.482009	0.989147
MIMAT0020629	mmu-miR-5121	miRNA	0.215827	0.599124	0.839268	0.407087	0.989147
MIMAT0017247	mmu-miR-497-3p	miRNA	0.215116	0.389508	2.21097	0.0337514	0.875091
MIMAT0028055	mmu-miR-7074-3p	miRNA	0.214197	0.31887	1.75784	0.0876299	0.978695
MIMAT0027824	mmu-miR-6962-5p	miRNA	0.211532	0.575456	1.34712	0.186709	0.989147
MIMAT0028004	mmu-miR-7050-5p	miRNA	0.211134	0.759315	1.17304	0.248802	0.989147
MIMAT0017176	mmu-miR-448-5p	miRNA	0.210569	0.30008	1.79874	0.0807986	0.978695
MIMAT0029880	mmu-miR-465d-5p	miRNA	0.209639	0.387045	1.94721	0.0596712	0.944365
MIMAT0014894	mmu-miR-466n-3p	miRNA	0.208747	0.338939	1.70961	0.0963032	0.978695
MIMAT0009443	mmu-miR-1946b	miRNA	0.208732	1.14611	0.762413	0.450986	0.989147
MIMAT0025160	mmu-miR-6407	miRNA	0.208704	0.437741	1.53023	0.135063	0.989147
MIMAT0029830	mmu-miR-7662-5p	miRNA	0.207969	0.941468	0.537199	0.594572	0.989147
MIMAT0004870	mmu-miR-453	miRNA	0.207604	0.411614	1.60718	0.117114	0.989147
MIMAT0017271	mmu-miR-193b-5p	miRNA	0.207115	0.863988	0.924077	0.361853	0.989147
MIMAT0000380	mmu-miR-302a-3p	miRNA	0.207089	0.542649	1.32395	0.194209	0.989147
MIMAT0014818	mmu-miR-3106-3p	miRNA	0.207041	0.543516	1.30768	0.199613	0.989147
MIMAT0031412	mmu-miR-8107	miRNA	0.206985	0.579183	0.961324	0.343067	0.989147
MIMAT0022354	mmu-miR-3544-3p	miRNA	0.204562	0.23226	1.53343	0.134274	0.989147
MIMAT0007864	mmu-miR-1897-5p	miRNA	0.204454	0.453641	1.70892	0.0964333	0.978695
MIMAT0004891	mmu-miR-509-3p	miRNA	0.2033	0.410501	1.53254	0.134492	0.989147
MIMAT0027911	mmu-miR-7003-3p	miRNA	0.202917	0.456728	1.17563	0.247778	0.989147
MIMAT0027875	mmu-miR-6986-3p	miRNA	0.202194	0.398208	1.52917	0.135324	0.989147
MIMAT0017032	mmu-miR-329-5p	miRNA	0.202038	0.820989	1.09608	0.280624	0.989147
MIMAT0004622	mmu-let-7c-1-3p	miRNA	0.201878	0.238446	1.99523	0.0539491	0.944365
MIMAT0003374	mmu-miR-302b-3p	miRNA	0.201875	0.297034	1.98688	0.0549081	0.944365
MIMAT0025093	mmu-miR-6350	miRNA	0.200043	0.630914	1.3787	0.176845	0.989147
MIMAT0000671	mmu-miR-224-5p	miRNA	0.199585	0.529572	1.63827	0.110439	0.989147
MIMAT0009440	mmu-miR-1967	miRNA	0.19946	0.590624	1.18373	0.244597	0.989147
MIMAT0028405	mmu-miR-7218-3p	miRNA	0.197535	0.639842	1.35168	0.18526	0.989147
MIMAT0029801	mmu-miR-7649-3p	miRNA	0.196945	0.318268	1.65436	0.10711	0.989147
MIMAT0025115	mmu-miR-6371	miRNA	0.195832	0.81538	1.07699	0.288945	0.989147
MIMAT0009390	mmu-miR-1927	miRNA	0.195176	0.393594	1.55424	0.129237	0.989147
MIMAT0003469	mmu-miR-690	miRNA	0.194251	2.76896	0.17321	0.863496	0.990115
MIMAT0025174	mmu-miR-6418-3p	miRNA	0.192988	0.313392	1.41871	0.164939	0.989147
MIMAT0003783	mmu-miR-615-3p	miRNA	0.192986	0.793641	1.29693	0.203246	0.989147
MIMAT0027818	mmu-miR-6959-5p	miRNA	0.191883	0.722041	0.940274	0.353603	0.989147
MIMAT0017008	mmu-miR-301a-5p	miRNA	0.190895	0.455727	1.38881	0.173775	0.989147
MIMAT0028435	mmu-miR-7233-3p	miRNA	0.190873	0.560446	1.2115	0.233923	0.989147
MIMAT0029837	mmu-miR-7665-3p	miRNA	0.190657	0.508332	1.0037	0.322498	0.989147
MIMAT0017068	mmu-miR-181c-3p	miRNA	0.190402	0.624297	1.44851	0.156486	0.989147
MIMAT0014930	mmu-miR-344g-3p	miRNA	0.189866	1.76946	0.58237	0.564098	0.989147
MIMAT0027718	mmu-miR-6909-5p	miRNA	0.189775	1.89955	0.2711	0.787927	0.989147
MIMAT0003377	mmu-miR-302d-3p	miRNA	0.189361	0.572813	1.32351	0.194353	0.989147
MIMAT0003892	mmu-miR-762	miRNA	0.189316	7.36168	0.19847	0.84384	0.989147
MIMAT0025144	mmu-miR-6394	miRNA	0.189238	0.81914	1.16887	0.250456	0.989147
MIMAT0027981	mmu-miR-7038-3p	miRNA	0.18812	0.468322	1.33682	0.190015	0.989147
MIMAT0014880	mmu-miR-3086-5p	miRNA	0.187416	0.485647	1.33059	0.192035	0.989147
MIMAT0027694	mmu-miR-6897-5p	miRNA	0.187077	0.528064	1.18983	0.242224	0.989147
MIMAT0017238	mmu-miR-665-5p	miRNA	0.186973	0.564863	1.28385	0.207735	0.989147
MIMAT0000367	mmu-miR-291a-5p	miRNA	0.186442	0.40514	1.38288	0.17557	0.989147
MIMAT0004534	mmu-miR-145a-3p	miRNA	0.185635	0.516744	1.7394	0.090865	0.978695
MIMAT0004862	mmu-miR-877-3p	miRNA	0.184609	0.628647	1.0138	0.317722	0.989147
MIMAT0004884	mmu-miR-466h-5p	miRNA	0.183997	0.574306	1.0589	0.29699	0.989147
MIMAT0004943	mmu-miR-653-5p	miRNA	0.182597	0.446917	1.35216	0.185107	0.989147
MIMAT0029825	mmu-miR-7659-3p	miRNA	0.181996	0.581657	1.14625	0.259568	0.989147
MIMAT0001081	mmu-miR-196b-5p	miRNA	0.181866	0.292155	1.65179	0.107635	0.989147
MIMAT0025136	mmu-miR-5124b	miRNA	0.18142	0.0573983	1.54541	0.131355	0.989147
MIMAT0020647	mmu-miR-5136	miRNA	0.181387	0.501514	1.39761	0.171136	0.989147
MIMAT0020640	mmu-miR-5129-5p	miRNA	0.181364	0.42916	1.34414	0.187659	0.989147
MIMAT0027952	mmu-miR-7024-5p	miRNA	0.181278	0.698424	0.728865	0.470994	0.989147
MIMAT0027768	mmu-miR-6934-5p	miRNA	0.181072	0.437546	1.17217	0.249145	0.989147
MIMAT0028437	mmu-miR-7234-3p	miRNA	0.180513	0.177045	1.48005	0.147918	0.989147
MIMAT0029865	mmu-miR-292b-3p	miRNA	0.180239	0.372057	1.51022	0.140078	0.989147
MIMAT0017279	mmu-miR-873a-3p	miRNA	0.179496	0.253469	1.97534	0.0562584	0.944365
MIMAT0017323	mmu-miR-669k-5p	miRNA	0.179111	0.416522	1.24429	0.221764	0.989147
MIMAT0027878	mmu-miR-6988-5p	miRNA	0.178305	0.19637	1.39099	0.17312	0.989147
MIMAT0017010	mmu-miR-19b-2-5p	miRNA	0.178138	0.491831	1.26765	0.213399	0.989147
MIMAT0014872	mmu-miR-3082-5p	miRNA	0.175487	1.13066	0.59162	0.557956	0.989147
MIMAT0014864	mmu-miR-3078-5p	miRNA	0.175148	0.721028	1.06222	0.295503	0.989147
MIMAT0014949	mmu-miR-3109-5p	miRNA	0.175078	0.527102	1.32456	0.194009	0.989147
MIMAT0017055	mmu-miR-219a-1-3p	miRNA	0.174715	0.268022	1.36694	0.180469	0.989147
MIMAT0029888	mmu-miR-216c-5p	miRNA	0.174052	0.475678	1.08863	0.283848	0.989147
MIMAT0028027	mmu-miR-7061-3p	miRNA	0.17394	0.580864	0.992196	0.327998	0.989147
MIMAT0000612	mmu-miR-135b-5p	miRNA	0.173133	0.300875	1.23734	0.2243	0.989147
MIMAT0025096	mmu-miR-6353	miRNA	0.173033	0.20498	1.67459	0.103042	0.989147
MIMAT0027761	mmu-miR-6930-3p	miRNA	0.172201	0.753781	1.01392	0.317665	0.989147
MIMAT0014883	mmu-miR-466m-3p	miRNA	0.171629	0.619781	1.12584	0.26799	0.989147
MIMAT0027703	mmu-miR-6901-3p	miRNA	0.170001	0.327098	1.48472	0.146682	0.989147
MIMAT0028080	mmu-miR-7087-5p	miRNA	0.169632	0.614589	1.09815	0.279729	0.989147
MIMAT0027749	mmu-miR-6924-3p	miRNA	0.167881	0.641879	0.782923	0.439005	0.989147
MIMAT0028071	mmu-miR-7082-3p	miRNA	0.167616	0.817643	0.859157	0.396174	0.989147
MIMAT0025097	mmu-miR-6354	miRNA	0.165892	0.327597	1.44197	0.158313	0.989147
MIMAT0027783	mmu-miR-6941-3p	miRNA	0.165746	0.547174	1.25235	0.218851	0.989147
MIMAT0017024	mmu-miR-103-1-5p	miRNA	0.164826	0.233415	0.995604	0.326362	0.989147
MIMAT0020618	mmu-miR-5110	miRNA	0.1645	0.873724	0.435865	0.665645	0.989147
MIMAT0004653	mmu-miR-342-5p	miRNA	0.164239	0.425958	1.02415	0.312878	0.989147
MIMAT0004875	mmu-miR-466b-5p	miRNA	0.164181	0.481413	1.48575	0.146411	0.989147
MIMAT0014885	mmu-miR-466o-5p	miRNA	0.164181	0.481413	1.48575	0.146411	0.989147
MIMAT0031393	mmu-miR-8092	miRNA	0.163278	0.422455	1.24099	0.222966	0.989147
MIMAT0017348	mmu-miR-1955-3p	miRNA	0.163207	0.450041	0.996322	0.326018	0.989147
MIMAT0017062	mmu-miR-224-3p	miRNA	0.163043	0.41187	1.50011	0.142666	0.989147
MIMAT0027864	mmu-miR-6981-5p	miRNA	0.162096	0.620592	0.841365	0.405927	0.989147
MIMAT0009417	mmu-miR-1950	miRNA	0.161592	0.600729	0.717232	0.47805	0.989147
MIMAT0028036	mmu-miR-7066-5p	miRNA	0.161496	0.591986	1.06944	0.292283	0.989147
MIMAT0003890	mmu-miR-551b-3p	miRNA	0.161428	0.291536	1.11055	0.274429	0.989147
MIMAT0009396	mmu-miR-1933-5p	miRNA	0.160615	0.566547	1.04814	0.301848	0.989147
MIMAT0017329	mmu-miR-1193-5p	miRNA	0.159247	0.649109	1.1636	0.252558	0.989147
MIMAT0028091	mmu-miR-7092-3p	miRNA	0.157867	0.533626	1.04783	0.301988	0.989147
MIMAT0017083	mmu-miR-133b-5p	miRNA	0.157442	0.443277	1.02825	0.310976	0.989147
MIMAT0004788	mmu-miR-20b-3p	miRNA	0.156964	0.460862	1.24632	0.221027	0.989147
MIMAT0004659	mmu-miR-10a-3p	miRNA	0.156744	0.136926	1.59931	0.118854	0.989147
MIMAT0031396	mmu-miR-8095	miRNA	0.155596	0.579967	1.14377	0.260581	0.989147
MIMAT0003893	mmu-miR-761	miRNA	0.155221	0.480669	1.29608	0.203536	0.989147
MIMAT0003743	mmu-miR-712-3p	miRNA	0.155098	0.600684	1.05639	0.298117	0.989147
MIMAT0025164	mmu-miR-6411	miRNA	0.15488	0.14669	1.84931	0.0729802	0.978633
MIMAT0025154	mmu-miR-6402	miRNA	0.154826	0.607352	0.891539	0.378805	0.989147
MIMAT0028064	mmu-miR-7079-5p	miRNA	0.154627	0.581703	0.898586	0.375091	0.989147
MIMAT0022374	mmu-miR-5623-3p	miRNA	0.153569	0.562319	1.29982	0.202266	0.989147
MIMAT0016997	mmu-miR-187-5p	miRNA	0.153492	1.08098	0.392196	0.697322	0.989147
MIMAT0025143	mmu-miR-6393	miRNA	0.152984	0.701646	0.967152	0.340188	0.989147
MIMAT0004873	mmu-miR-465c-5p	miRNA	0.15289	0.469515	1.48634	0.146256	0.989147
MIMAT0022370	mmu-miR-5621-3p	miRNA	0.152689	0.585316	1.02773	0.311218	0.989147
MIMAT0014823	mmu-miR-3057-3p	miRNA	0.152607	0.646614	0.939122	0.354185	0.989147
MIMAT0027959	mmu-miR-7027-3p	miRNA	0.152584	0.41955	1.05437	0.299028	0.989147
MIMAT0031407	mmu-miR-8103	miRNA	0.152155	0.667322	1.14328	0.260781	0.989147
MIMAT0028017	mmu-miR-7056-3p	miRNA	0.1521	0.541995	1.09195	0.282408	0.989147
MIMAT0011215	mmu-miR-2139	miRNA	0.152053	0.434757	1.28609	0.20696	0.989147
MIMAT0003898	mmu-miR-760-3p	miRNA	0.151762	0.564501	1.00426	0.322232	0.989147
MIMAT0027802	mmu-miR-6951-5p	miRNA	0.151091	0.313585	1.575	0.124368	0.989147
MIMAT0028082	mmu-miR-7088-5p	miRNA	0.150602	1.0549	0.346484	0.73108	0.989147
MIMAT0000229	mmu-miR-199a-5p	miRNA	0.15027	0.659036	0.941223	0.353123	0.989147
MIMAT0012774	mmu-miR-664-3p	miRNA	0.150075	0.461499	0.982084	0.332884	0.989147
MIMAT0003895	mmu-miR-764-3p	miRNA	0.149671	0.59101	0.933235	0.357173	0.989147
MIMAT0028407	mmu-miR-7219-3p	miRNA	0.1494	0.213555	1.29991	0.202236	0.989147
MIMAT0022985	mmu-miR-5107-3p	miRNA	0.148755	0.403135	0.857838	0.396892	0.989147
MIMAT0014812	mmu-miR-3059-3p	miRNA	0.148587	0.631995	1.22585	0.228543	0.989147
MIMAT0028019	mmu-miR-7057-3p	miRNA	0.148491	0.333406	1.13739	0.2632	0.989147
MIMAT0025130	mmu-miR-6384	miRNA	0.14834	0.235169	1.46618	0.151639	0.989147
MIMAT0003456	mmu-miR-495-3p	miRNA	0.148227	0.195714	1.17105	0.249591	0.989147
MIMAT0003467	mmu-miR-688	miRNA	0.147758	0.477972	1.16404	0.252379	0.989147
MIMAT0028453	mmu-miR-7242-3p	miRNA	0.147231	0.544427	0.925216	0.361269	0.989147
MIMAT0029848	mmu-miR-7671-5p	miRNA	0.147222	0.515842	0.942612	0.352422	0.989147
MIMAT0003183	mmu-miR-376c-3p	miRNA	0.147003	0.585127	0.871204	0.389654	0.989147
MIMAT0028028	mmu-miR-7062-5p	miRNA	0.146305	0.609363	0.824217	0.415468	0.989147
MIMAT0009455	mmu-miR-1983	miRNA	0.145323	0.0715298	1.42948	0.161842	0.989147
MIMAT0014877	mmu-miR-3084-3p	miRNA	0.144977	0.314324	1.42307	0.16368	0.989147
MIMAT0005834	mmu-miR-466i-3p	miRNA	0.144664	0.267705	0.956818	0.345304	0.989147
MIMAT0016992	mmu-miR-153-5p	miRNA	0.144531	0.783393	0.831541	0.411377	0.989147
MIMAT0017244	mmu-miR-496a-5p	miRNA	0.144305	0.333469	1.36933	0.17973	0.989147
MIMAT0003189	mmu-miR-291b-5p	miRNA	0.144075	0.60723	0.604945	0.549167	0.989147
MIMAT0004670	mmu-miR-7a-1-3p	miRNA	0.14381	0.414706	0.910836	0.368691	0.989147
MIMAT0014845	mmu-miR-3069-3p	miRNA	0.143413	0.511066	1.00048	0.324034	0.989147
MIMAT0014846	mmu-miR-3070a-5p	miRNA	0.143243	0.549374	1.04933	0.30131	0.989147
MIMAT0014848	mmu-miR-3070b-5p	miRNA	0.143243	0.549374	1.04933	0.30131	0.989147
MIMAT0029874	mmu-miR-7680-5p	miRNA	0.14307	0.311284	1.31453	0.197324	0.989147
MIMAT0004828	mmu-miR-708-5p	miRNA	0.142632	0.435836	1.05091	0.300594	0.989147
MIMAT0020627	mmu-miR-5119	miRNA	0.142525	0.798233	0.399455	0.692016	0.989147
MIMAT0025117	mmu-miR-6373	miRNA	0.142354	0.363997	1.20189	0.237576	0.989147
MIMAT0005843	mmu-miR-1188-5p	miRNA	0.142222	0.592814	0.581966	0.564367	0.989147
MIMAT0027737	mmu-miR-6918-3p	miRNA	0.142093	0.470705	1.12727	0.267396	0.989147
MIMAT0005832	mmu-miR-669g	miRNA	0.141681	0.507568	0.922127	0.362855	0.989147
MIMAT0022367	mmu-miR-5620-5p	miRNA	0.140973	0.491261	0.802157	0.427944	0.989147
MIMAT0028069	mmu-miR-7081-3p	miRNA	0.140744	0.674338	0.942837	0.352309	0.989147
MIMAT0028005	mmu-miR-7050-3p	miRNA	0.14009	0.470114	0.723487	0.474249	0.989147
MIMAT0020634	mmu-miR-5124a	miRNA	0.13955	0.271325	1.25237	0.218844	0.989147
MIMAT0000522	mmu-let-7b-5p	miRNA	0.139415	8.7851	0.118773	0.906143	0.994083
MIMAT0017256	mmu-miR-700-5p	miRNA	0.13892	0.937772	0.453831	0.652788	0.989147
MIMAT0000375	mmu-miR-297a-5p	miRNA	0.138842	0.875092	0.654763	0.516955	0.989147
MIMAT0025584	mmu-miR-6539	miRNA	0.138538	0.313945	1.09405	0.281502	0.989147
MIMAT0022930	mmu-miR-698-5p	miRNA	0.138002	0.813243	0.680605	0.500656	0.989147
MIMAT0014844	mmu-miR-3069-5p	miRNA	0.13791	0.461488	1.28421	0.207611	0.989147
MIMAT0005448	mmu-miR-467b-5p	miRNA	0.137029	0.269853	1.2076	0.235399	0.989147
MIMAT0028087	mmu-miR-7090-3p	miRNA	0.136949	0.354257	0.98457	0.331678	0.989147
MIMAT0009411	mmu-miR-1306-3p	miRNA	0.13571	1.5507	0.209003	0.835673	0.989147
MIMAT0017061	mmu-miR-222-5p	miRNA	0.135683	0.518683	1.15859	0.254565	0.989147
MIMAT0025107	mmu-miR-6363	miRNA	0.135619	0.421443	0.979687	0.334049	0.989147
MIMAT0004759	mmu-miR-466a-5p	miRNA	0.134784	0.302798	1.02355	0.313159	0.989147
MIMAT0029869	mmu-miR-7677-3p	miRNA	0.134114	0.919608	0.881087	0.384357	0.989147
MIMAT0029796	mmu-miR-7647-5p	miRNA	0.133943	0.915907	0.741416	0.463449	0.989147
MIMAT0000663	mmu-miR-218-5p	miRNA	0.133316	0.322565	1.12235	0.269451	0.989147
MIMAT0027859	mmu-miR-6978-3p	miRNA	0.132932	0.204933	1.17945	0.246275	0.989147
MIMAT0016999	mmu-miR-194-1-3p	miRNA	0.132511	0.397376	1.31773	0.196262	0.989147
MIMAT0027819	mmu-miR-6959-3p	miRNA	0.132429	0.411324	1.08888	0.283743	0.989147
MIMAT0019336	mmu-miR-3960	miRNA	0.132406	9.08485	0.198593	0.843744	0.989147
MIMAT0017082	mmu-miR-383-3p	miRNA	0.131872	0.67951	0.876038	0.387058	0.989147
MIMAT0016998	mmu-miR-190a-3p	miRNA	0.131246	1.38158	0.186875	0.852851	0.989147
MIMAT0027735	mmu-miR-6917-3p	miRNA	0.130856	0.366006	0.814707	0.420818	0.989147
MIMAT0003472	mmu-miR-693-5p	miRNA	0.129572	0.545866	0.80879	0.424169	0.989147
MIMAT0003897	mmu-miR-759	miRNA	0.129484	0.485604	0.892653	0.378216	0.989147
MIMAT0025586	mmu-miR-6540-3p	miRNA	0.129319	0.203702	1.32702	0.193203	0.989147
MIMAT0028029	mmu-miR-7062-3p	miRNA	0.128873	0.455198	0.737752	0.465645	0.989147
MIMAT0025151	mmu-miR-6399	miRNA	0.128208	0.241954	1.14578	0.259758	0.989147
MIMAT0003483	mmu-miR-696	miRNA	0.127625	0.405278	0.896355	0.376264	0.989147
MIMAT0025150	mmu-miR-6398	miRNA	0.127307	0.223051	1.00925	0.319867	0.989147
MIMAT0025083	mmu-miR-6340	miRNA	0.127144	0.645581	0.795555	0.431721	0.989147
MIMAT0004691	mmu-miR-382-3p	miRNA	0.126855	0.13271	1.10882	0.275162	0.989147
MIMAT0014954	mmu-miR-374c-3p	miRNA	0.125208	0.552142	0.980872	0.333472	0.989147
MIMAT0001092	mmu-miR-376b-3p	miRNA	0.12506	0.403389	1.05495	0.298769	0.989147
MIMAT0017345	mmu-miR-669l-3p	miRNA	0.124479	0.273932	1.12601	0.267919	0.989147
MIMAT0004887	mmu-miR-467d-3p	miRNA	0.124112	0.188032	0.846863	0.402897	0.989147
MIMAT0020635	mmu-miR-5125	miRNA	0.123662	0.259962	1.07719	0.288857	0.989147
MIMAT0017322	mmu-miR-466l-5p	miRNA	0.123225	0.312404	1.00948	0.319762	0.989147
MIMAT0000748	mmu-miR-383-5p	miRNA	0.122924	0.582924	0.825109	0.414968	0.989147
MIMAT0028390	mmu-miR-7211-5p	miRNA	0.12288	0.58621	0.720234	0.476224	0.989147
MIMAT0027870	mmu-miR-6984-5p	miRNA	0.12286	0.862579	0.501722	0.619044	0.989147
MIMAT0027696	mmu-miR-6898-5p	miRNA	0.122341	0.771101	0.593344	0.556814	0.989147
MIMAT0028449	mmu-miR-7240-3p	miRNA	0.122008	0.42701	0.913262	0.367432	0.989147
MIMAT0025137	mmu-miR-6389	miRNA	0.121972	0.309245	1.02757	0.311291	0.989147
MIMAT0004238	mmu-miR-743a-3p	miRNA	0.121813	0.721232	0.651426	0.51908	0.989147
MIMAT0000523	mmu-let-7c-5p	miRNA	0.121611	7.65493	0.0913272	0.92776	0.994083
MIMAT0027880	mmu-miR-6989-5p	miRNA	0.121316	0.840624	0.513988	0.610531	0.989147
MIMAT0025125	mmu-miR-6379	miRNA	0.120787	0.666155	0.870796	0.389874	0.989147
MIMAT0003471	mmu-miR-692	miRNA	0.120683	0.38303	0.76354	0.450322	0.989147
MIMAT0027851	mmu-miR-6974-3p	miRNA	0.120408	0.360577	0.839649	0.406876	0.989147
MIMAT0004541	mmu-miR-188-3p	miRNA	0.120192	0.569206	0.801704	0.428202	0.989147
MIMAT0000217	mmu-miR-188-5p	miRNA	0.119692	0.12402	1.18605	0.243692	0.989147
MIMAT0027343	mmu-miR-6516-5p	miRNA	0.119633	0.345819	0.789587	0.435153	0.989147
MIMAT0025119	mmu-miR-6375	miRNA	0.119147	0.372481	0.86961	0.390513	0.989147
MIMAT0027877	mmu-miR-6987-3p	miRNA	0.11852	0.573152	0.795969	0.431483	0.989147
MIMAT0015219	mmu-miR-3475-3p	miRNA	0.118363	0.266336	0.932681	0.357455	0.989147
MIMAT0004939	mmu-miR-208b-3p	miRNA	0.118017	0.450658	0.96691	0.340307	0.989147
MIMAT0014879	mmu-miR-3085-3p	miRNA	0.117995	0.670287	0.700467	0.488324	0.989147
MIMAT0027886	mmu-miR-6992-5p	miRNA	0.117738	0.498488	0.848812	0.401827	0.989147
MIMAT0027943	mmu-miR-7019-3p	miRNA	0.117448	0.501394	0.667091	0.509143	0.989147
MIMAT0022360	mmu-miR-5616-3p	miRNA	0.117256	0.425446	0.848228	0.402147	0.989147
MIMAT0028021	mmu-miR-7058-3p	miRNA	0.116645	0.438946	0.911732	0.368226	0.989147
MIMAT0031409	mmu-miR-8105	miRNA	0.116559	0.939229	0.512752	0.611386	0.989147
MIMAT0027948	mmu-miR-7022-5p	miRNA	0.116041	0.488923	0.874667	0.387793	0.989147
MIMAT0014805	mmu-miR-1843a-5p	miRNA	0.11574	0.827158	0.697752	0.49	0.989147
MIMAT0005847	mmu-miR-1190	miRNA	0.115067	0.71248	0.567936	0.57375	0.989147
MIMAT0029881	mmu-miR-465d-3p	miRNA	0.114995	0.537698	0.690393	0.494557	0.989147
MIMAT0009410	mmu-miR-1945	miRNA	0.114821	0.794784	0.515035	0.609807	0.989147
MIMAT0029833	mmu-miR-7663-3p	miRNA	0.114802	0.414928	0.888556	0.380384	0.989147
MIMAT0017215	mmu-miR-494-5p	miRNA	0.114786	0.0940148	1.00455	0.322094	0.989147
MIMAT0028016	mmu-miR-7056-5p	miRNA	0.114458	0.465054	0.883726	0.382951	0.989147
MIMAT0022359	mmu-miR-5616-5p	miRNA	0.114444	0.399659	0.881389	0.384196	0.989147
MIMAT0031390	mmu-miR-3473f	miRNA	0.114258	0.310768	1.09851	0.279578	0.989147
MIMAT0004577	mmu-miR-299a-3p	miRNA	0.11399	0.807833	0.654503	0.51712	0.989147
MIMAT0005295	mmu-miR-376c-5p	miRNA	0.113782	0.321135	1.00527	0.321752	0.989147
MIMAT0017268	mmu-miR-874-5p	miRNA	0.113551	0.66426	0.571427	0.571408	0.989147
MIMAT0029867	mmu-miR-1191b-3p	miRNA	0.113543	0.374287	0.934741	0.356407	0.989147
MIMAT0017344	mmu-miR-1948-5p	miRNA	0.112945	0.26655	0.945027	0.351206	0.989147
MIMAT0025126	mmu-miR-6380	miRNA	0.112939	0.497803	0.957024	0.345202	0.989147
MIMAT0028001	mmu-miR-7048-3p	miRNA	0.112827	0.439339	1.04797	0.301926	0.989147
MIMAT0001537	mmu-miR-429-3p	miRNA	0.112819	0.670251	0.801922	0.428077	0.989147
MIMAT0004876	mmu-miR-466b-3p	miRNA	0.112576	0.119842	0.886783	0.381325	0.989147
MIMAT0004878	mmu-miR-466c-3p	miRNA	0.112576	0.119842	0.886783	0.381325	0.989147
MIMAT0014892	mmu-miR-466p-3p	miRNA	0.112576	0.119842	0.886783	0.381325	0.989147
MIMAT0001076	mmu-miR-384-3p	miRNA	0.112324	0.0798911	0.789263	0.43534	0.989147
MIMAT0029843	mmu-miR-7668-3p	miRNA	0.112179	0.580899	0.533992	0.596766	0.989147
MIMAT0027711	mmu-miR-6905-3p	miRNA	0.112018	0.526758	0.67672	0.503088	0.989147
MIMAT0001090	mmu-miR-409-3p	miRNA	0.111897	0.554308	0.687238	0.496519	0.989147
MIMAT0000518	mmu-miR-196a-5p	miRNA	0.111451	0.669256	0.714853	0.479501	0.989147
MIMAT0003459	mmu-miR-682	miRNA	0.111283	0.666569	0.707697	0.483879	0.989147
MIMAT0027780	mmu-miR-6940-5p	miRNA	0.111264	0.578013	0.655446	0.51652	0.989147
MIMAT0028410	mmu-miR-7221-5p	miRNA	0.110824	0.159808	0.992204	0.327994	0.989147
MIMAT0027720	mmu-miR-6910-5p	miRNA	0.110669	0.650925	0.498874	0.621029	0.989147
MIMAT0004853	mmu-miR-874-3p	miRNA	0.110336	0.727542	0.440869	0.662054	0.989147
MIMAT0004886	mmu-miR-467d-5p	miRNA	0.110035	0.496333	0.744704	0.461484	0.989147
MIMAT0009400	mmu-miR-1936	miRNA	0.109507	0.801578	0.564111	0.576321	0.989147
MIMAT0009404	mmu-miR-1940	miRNA	0.10939	0.448441	0.353361	0.725964	0.989147
MIMAT0000711	mmu-miR-365-3p	miRNA	0.109018	0.667025	0.68272	0.499335	0.989147
MIMAT0027732	mmu-miR-6916-5p	miRNA	0.108492	0.454959	0.742618	0.462731	0.989147
MIMAT0004704	mmu-miR-335-3p	miRNA	0.108305	0.344894	0.836147	0.408816	0.989147
MIMAT0027710	mmu-miR-6905-5p	miRNA	0.108302	0.624739	0.756513	0.454468	0.989147
MIMAT0025165	mmu-miR-6412	miRNA	0.108199	0.378687	1.05306	0.29962	0.989147
MIMAT0027923	mmu-miR-7009-3p	miRNA	0.107822	0.545239	0.595616	0.555312	0.989147
MIMAT0031417	mmu-miR-8111	miRNA	0.107734	0.485204	0.853541	0.399237	0.989147
MIMAT0003190	mmu-miR-291b-3p	miRNA	0.1068	0.400747	0.862054	0.3946	0.989147
MIMAT0000551	mmu-miR-323-3p	miRNA	0.106371	0.140051	0.782982	0.43897	0.989147
MIMAT0027719	mmu-miR-6909-3p	miRNA	0.105491	0.274763	0.923649	0.362073	0.989147
MIMAT0004529	mmu-miR-125b-2-3p	miRNA	0.105169	0.30521	0.914825	0.366622	0.989147
MIMAT0000521	mmu-let-7a-5p	miRNA	0.105118	5.40032	0.0646846	0.948798	0.994946
MIMAT0031426	mmu-miR-8120	miRNA	0.104658	0.581223	0.842421	0.405344	0.989147
MIMAT0028396	mmu-miR-7214-5p	miRNA	0.104561	0.39571	1.03621	0.307299	0.989147
MIMAT0004932	mmu-miR-878-5p	miRNA	0.104226	0.460761	0.859187	0.396158	0.989147
MIMAT0009407	mmu-miR-1942	miRNA	0.10372	0.739002	0.603823	0.549904	0.989147
MIMAT0025102	mmu-miR-6359	miRNA	0.103264	0.525041	0.847708	0.402433	0.989147
MIMAT0028400	mmu-miR-7216-5p	miRNA	0.103161	1.00313	0.540547	0.592287	0.989147
MIMAT0014909	mmu-miR-3094-5p	miRNA	0.103094	0.5836	0.810514	0.423191	0.989147
MIMAT0009413	mmu-miR-1947-5p	miRNA	0.102566	0.8052	0.615327	0.54237	0.989147
MIMAT0014802	mmu-miR-1264-5p	miRNA	0.102322	0.301204	1.02326	0.313292	0.989147
MIMAT0028033	mmu-miR-7064-3p	miRNA	0.102212	0.0746096	1.0002	0.324164	0.989147
MIMAT0025147	mmu-miR-6396	miRNA	0.102175	0.714499	0.515233	0.60967	0.989147
MIMAT0004934	mmu-miR-872-5p	miRNA	0.101947	0.535807	0.672261	0.505887	0.989147
MIMAT0005833	mmu-miR-669d-5p	miRNA	0.10185	0.449851	0.690847	0.494276	0.989147
MIMAT0029897	mmu-miR-7685-3p	miRNA	0.101323	0.306243	0.867969	0.391398	0.989147
MIMAT0020540	mmu-miR-5046	miRNA	0.101121	1.18823	0.4076	0.686081	0.989147
MIMAT0014893	mmu-miR-466n-5p	miRNA	0.100721	0.581065	0.741705	0.463277	0.989147
MIMAT0003511	mmu-miR-450b-5p	miRNA	0.100576	0.47328	0.620799	0.538804	0.989147
MIMAT0014881	mmu-miR-3086-3p	miRNA	0.100489	0.642291	0.411577	0.683191	0.989147
MIMAT0028081	mmu-miR-7087-3p	miRNA	0.100203	0.440942	0.818547	0.418653	0.989147
MIMAT0027702	mmu-miR-6901-5p	miRNA	0.0998627	0.39863	0.662433	0.512087	0.989147
MIMAT0029899	mmu-miR-7686-3p	miRNA	0.0998144	0.334726	0.619253	0.539811	0.989147
MIMAT0000164	mmu-miR-154-5p	miRNA	0.0997662	0.405358	0.875152	0.387533	0.989147
MIMAT0004581	mmu-miR-34b-3p	miRNA	0.0992745	0.68224	0.645776	0.522689	0.989147
MIMAT0020622	mmu-miR-5114	miRNA	0.0988569	0.68653	0.567864	0.573798	0.989147
MIMAT0014927	mmu-miR-344c-5p	miRNA	0.0986878	0.4583	0.708697	0.483266	0.989147
MIMAT0017056	mmu-miR-223-5p	miRNA	0.0986114	0.273897	0.971154	0.338219	0.989147
MIMAT0016987	mmu-miR-138-2-3p	miRNA	0.0981665	0.271322	0.684891	0.497981	0.989147
MIMAT0009424	mmu-miR-1953	miRNA	0.0980178	0.652028	0.620601	0.538934	0.989147
MIMAT0009459	mmu-miR-1982-5p	miRNA	0.0978961	0.737289	0.453031	0.653358	0.989147
MIMAT0003735	mmu-miR-672-5p	miRNA	0.0974465	0.46945	0.723458	0.474267	0.989147
MIMAT0005854	mmu-miR-467g	miRNA	0.0971162	0.637907	0.6521	0.51865	0.989147
MIMAT0017249	mmu-miR-495-5p	miRNA	0.0969347	0.100453	0.638648	0.527262	0.989147
MIMAT0019344	mmu-miR-3964	miRNA	0.096763	0.161971	0.659976	0.513644	0.989147
MIMAT0000656	mmu-miR-139-5p	miRNA	0.0966074	0.928997	0.200074	0.842596	0.989147
MIMAT0027715	mmu-miR-6907-3p	miRNA	0.096282	0.463346	0.634812	0.529731	0.989147
MIMAT0029853	mmu-miR-7673-3p	miRNA	0.0961488	0.607105	0.60384	0.549893	0.989147
MIMAT0007872	mmu-miR-1906	miRNA	0.0956307	0.654063	0.591965	0.557727	0.989147
MIMAT0027809	mmu-miR-6954-3p	miRNA	0.0952451	0.681318	0.637685	0.527881	0.989147
MIMAT0020626	mmu-miR-5118	miRNA	0.095229	0.359837	0.659246	0.514107	0.989147
MIMAT0014932	mmu-miR-344f-3p	miRNA	0.0948663	0.988114	0.490395	0.626953	0.989147
MIMAT0004883	mmu-miR-466g	miRNA	0.0947861	0.134724	0.851006	0.400624	0.989147
MIMAT0025159	mmu-miR-6406	miRNA	0.0947018	0.525359	0.632369	0.531307	0.989147
MIMAT0029807	mmu-miR-219b-3p	miRNA	0.0945567	0.274852	0.699882	0.488685	0.989147
MIMAT0028440	mmu-miR-7236-5p	miRNA	0.0937582	0.407098	0.62375	0.536887	0.989147
MIMAT0000144	mmu-miR-132-3p	miRNA	0.0936834	1.35387	0.167404	0.868028	0.99088
MIMAT0017003	mmu-miR-205-3p	miRNA	0.0931187	0.373694	0.634534	0.529911	0.989147
MIMAT0017078	mmu-miR-375-5p	miRNA	0.0928656	0.450839	0.784199	0.438265	0.989147
MIMAT0000142	mmu-miR-9-5p	miRNA	0.0923722	0.417119	0.644944	0.523221	0.989147
MIMAT0017053	mmu-miR-212-5p	miRNA	0.0922389	0.36189	0.513813	0.610653	0.989147
MIMAT0003450	mmu-miR-488-3p	miRNA	0.0922116	0.43983	0.820905	0.417327	0.989147
MIMAT0007876	mmu-miR-1907	miRNA	0.0921396	0.509005	0.738354	0.465284	0.989147
MIMAT0000578	mmu-miR-337-3p	miRNA	0.0920032	0.37439	0.728078	0.47147	0.989147
MIMAT0014911	mmu-miR-3095-5p	miRNA	0.0914855	0.404063	0.766967	0.448309	0.989147
MIMAT0004578	mmu-miR-300-5p	miRNA	0.0914297	0.385094	0.650993	0.519356	0.989147
MIMAT0000237	mmu-miR-204-5p	miRNA	0.0906475	0.616966	0.560691	0.578625	0.989147
MIMAT0029798	mmu-miR-7648-5p	miRNA	0.090642	0.826687	0.541004	0.591975	0.989147
MIMAT0027729	mmu-miR-6914-3p	miRNA	0.0900502	0.355396	0.761056	0.451785	0.989147
MIMAT0028388	mmu-miR-7210-5p	miRNA	0.0895811	0.628713	0.616298	0.541736	0.989147
MIMAT0004544	mmu-miR-193a-5p	miRNA	0.0891718	0.806793	0.520647	0.605933	0.989147
MIMAT0004745	mmu-miR-384-5p	miRNA	0.088894	0.88309	0.468026	0.642704	0.989147
MIMAT0004840	mmu-miR-743b-3p	miRNA	0.0883695	0.170652	0.804267	0.42674	0.989147
MIMAT0004644	mmu-miR-337-5p	miRNA	0.0882846	0.447768	0.501364	0.619294	0.989147
MIMAT0027826	mmu-miR-6963-5p	miRNA	0.0881219	0.704362	0.27505	0.784916	0.989147
MIMAT0020636	mmu-miR-3572-3p	miRNA	0.0876273	0.458812	0.63158	0.531817	0.989147
MIMAT0000234	mmu-miR-201-5p	miRNA	0.087577	0.571516	0.395494	0.694909	0.989147
MIMAT0022699	mmu-miR-468-5p	miRNA	0.0875436	0.383064	0.560721	0.578605	0.989147
MIMAT0004826	mmu-miR-146b-3p	miRNA	0.0872097	0.741254	0.56763	0.573955	0.989147
MIMAT0027716	mmu-miR-6908-5p	miRNA	0.0869586	0.962293	0.445719	0.65858	0.989147
MIMAT0004936	mmu-miR-873a-5p	miRNA	0.0866687	0.239269	0.739505	0.464594	0.989147
MIMAT0000653	mmu-miR-28a-5p	miRNA	0.0865337	0.421636	0.801615	0.428253	0.989147
MIMAT0014800	mmu-miR-1247-5p	miRNA	0.0865269	0.366857	0.717878	0.477657	0.989147
MIMAT0027757	mmu-miR-6928-3p	miRNA	0.0864994	0.119736	0.539702	0.592863	0.989147
MIMAT0014817	mmu-miR-3106-5p	miRNA	0.0863003	0.349819	0.69764	0.49007	0.989147
MIMAT0028006	mmu-miR-7051-5p	miRNA	0.0862862	0.565299	0.565017	0.575712	0.989147
MIMAT0003510	mmu-miR-717	miRNA	0.0860416	0.17381	0.681165	0.500306	0.989147
MIMAT0031410	mmu-miR-3535	miRNA	0.0856798	2.25436	0.0837194	0.933763	0.994083
MIMAT0027707	mmu-miR-6903-3p	miRNA	0.0855922	0.606816	0.571053	0.571659	0.989147
MIMAT0016995	mmu-miR-182-3p	miRNA	0.0851872	0.479221	0.644186	0.523707	0.989147
MIMAT0028062	mmu-miR-7078-5p	miRNA	0.0847737	0.556465	0.639972	0.52641	0.989147
MIMAT0017208	mmu-miR-539-3p	miRNA	0.0847014	0.439526	0.66895	0.507971	0.989147
MIMAT0027708	mmu-miR-6904-5p	miRNA	0.0839688	0.288146	0.718432	0.47732	0.989147
MIMAT0029818	mmu-miR-7656-5p	miRNA	0.0834581	0.21952	0.697436	0.490196	0.989147
MIMAT0004188	mmu-miR-802-5p	miRNA	0.0826482	0.304231	0.729584	0.470561	0.989147
MIMAT0000745	mmu-miR-380-3p	miRNA	0.0824264	0.427351	0.67804	0.502261	0.989147
MIMAT0029847	mmu-miR-7670-3p	miRNA	0.0820987	0.421709	0.582673	0.563896	0.989147
MIMAT0004621	mmu-let-7b-3p	miRNA	0.0820059	0.736931	0.553495	0.583487	0.989147
MIMAT0027905	mmu-miR-7001-3p	miRNA	0.0819218	0.313708	0.723121	0.474471	0.989147
MIMAT0004824	mmu-miR-673-3p	miRNA	0.0813988	0.418105	0.61866	0.540197	0.989147
MIMAT0028013	mmu-miR-7054-3p	miRNA	0.0807854	0.519652	0.59975	0.552585	0.989147
MIMAT0020606	mmu-miR-5099	miRNA	0.0806163	0.322973	0.487738	0.628815	0.989147
MIMAT0000233	mmu-miR-200b-3p	miRNA	0.0805076	0.693908	0.52788	0.600956	0.989147
MIMAT0007868	mmu-miR-1903	miRNA	0.0802677	0.231275	0.641201	0.525622	0.989147
MIMAT0027946	mmu-miR-7021-5p	miRNA	0.0802463	0.327529	0.751912	0.457194	0.989147
MIMAT0031411	mmu-miR-8106	miRNA	0.0801524	0.541318	0.570783	0.57184	0.989147
MIMAT0014842	mmu-miR-3068-5p	miRNA	0.0796447	0.812618	0.459018	0.649095	0.989147
MIMAT0029813	mmu-miR-7653-3p	miRNA	0.0795762	0.582185	0.392428	0.697152	0.989147
MIMAT0014935	mmu-miR-3102-3p.2-3p	miRNA	0.0792845	0.591461	0.580047	0.565645	0.989147
MIMAT0027973	mmu-miR-7034-3p	miRNA	0.0791346	0.419478	0.555557	0.582092	0.989147
MIMAT0001420	mmu-miR-433-3p	miRNA	0.079022	0.71389	0.479775	0.63441	0.989147
MIMAT0027815	mmu-miR-6957-3p	miRNA	0.0785879	0.472301	0.544833	0.589367	0.989147
MIMAT0027699	mmu-miR-6899-3p	miRNA	0.0783054	0.336952	0.635767	0.529116	0.989147
MIMAT0014860	mmu-miR-3076-5p	miRNA	0.0778717	0.474213	0.506899	0.615445	0.989147
MIMAT0017036	mmu-miR-148b-5p	miRNA	0.0772367	0.704991	0.468672	0.642246	0.989147
MIMAT0003376	mmu-miR-302c-3p	miRNA	0.0770781	0.120065	0.715877	0.478876	0.989147
MIMAT0029852	mmu-miR-7673-5p	miRNA	0.0768207	0.473751	0.721584	0.475404	0.989147
MIMAT0017240	mmu-miR-802-3p	miRNA	0.0768153	0.543059	0.536768	0.594867	0.989147
MIMAT0000218	mmu-miR-24-1-5p	miRNA	0.0767859	0.358646	0.712646	0.480848	0.989147
MIMAT0004189	mmu-miR-693-3p	miRNA	0.0763958	0.344695	0.620014	0.539315	0.989147
MIMAT0025582	mmu-miR-6537-3p	miRNA	0.0763922	0.373165	0.599909	0.55248	0.989147
MIMAT0014870	mmu-miR-3081-5p	miRNA	0.0762765	1.10243	0.244493	0.808295	0.989147
MIMAT0031404	mmu-miR-497b	miRNA	0.0762691	0.401241	0.600694	0.551963	0.989147
MIMAT0028096	mmu-miR-7094b-2-5p	miRNA	0.0762236	0.628282	0.536629	0.594962	0.989147
MIMAT0029872	mmu-miR-7679-5p	miRNA	0.0759456	0.498673	0.606215	0.548333	0.989147
MIMAT0029904	mmu-miR-1258-5p	miRNA	0.0758768	0.723688	0.580131	0.56559	0.989147
MIMAT0020628	mmu-miR-5120	miRNA	0.0757913	0.788286	0.412331	0.682643	0.989147
MIMAT0029864	mmu-miR-292b-5p	miRNA	0.0753318	0.555359	0.449216	0.65608	0.989147
MIMAT0004930	mmu-miR-466d-5p	miRNA	0.0752363	0.449458	0.596619	0.55465	0.989147
MIMAT0027777	mmu-miR-6938-3p	miRNA	0.0750901	0.471359	0.556492	0.58146	0.989147
MIMAT0003172	mmu-miR-542-3p	miRNA	0.0746801	0.317728	0.536225	0.595237	0.989147
MIMAT0028401	mmu-miR-7216-3p	miRNA	0.0743807	0.506106	0.48094	0.63359	0.989147
MIMAT0017225	mmu-miR-302d-5p	miRNA	0.0743644	0.426472	0.527242	0.601394	0.989147
MIMAT0004632	mmu-miR-29c-5p	miRNA	0.0742881	0.446651	0.632202	0.531415	0.989147
MIMAT0003129	mmu-miR-485-3p	miRNA	0.0742578	0.548591	0.593311	0.556836	0.989147
MIMAT0027979	mmu-miR-7037-3p	miRNA	0.0742012	0.522789	0.516891	0.608524	0.989147
MIMAT0003477	mmu-miR-669a-5p	miRNA	0.0741579	0.502939	0.56383	0.576511	0.989147
MIMAT0014889	mmu-miR-669p-5p	miRNA	0.0741579	0.502939	0.56383	0.576511	0.989147
MIMAT0025081	mmu-miR-6338	miRNA	0.0739982	0.461134	0.423636	0.674456	0.989147
MIMAT0028011	mmu-miR-7053-3p	miRNA	0.0739708	0.485716	0.531766	0.59829	0.989147
MIMAT0017258	mmu-miR-500-5p	miRNA	0.0738393	0.378359	0.572895	0.570424	0.989147
MIMAT0000240	mmu-miR-207	miRNA	0.0737931	0.398294	0.469302	0.641801	0.989147
MIMAT0005842	mmu-miR-669h-3p	miRNA	0.0737618	0.780003	0.321687	0.749627	0.989147
MIMAT0014928	mmu-miR-344c-3p	miRNA	0.073638	0.678824	0.437333	0.664591	0.989147
MIMAT0017174	mmu-miR-370-5p	miRNA	0.0735996	0.421592	0.669983	0.507321	0.989147
MIMAT0022729	mmu-miR-1929-3p	miRNA	0.0733626	0.341039	0.610404	0.545588	0.989147
MIMAT0014948	mmu-miR-3108-3p	miRNA	0.0728613	0.399868	0.659471	0.513964	0.989147
MIMAT0005841	mmu-miR-669h-5p	miRNA	0.0724206	0.281836	0.629686	0.533041	0.989147
MIMAT0025098	mmu-miR-6355	miRNA	0.0721743	0.473249	0.612063	0.544502	0.989147
MIMAT0027988	mmu-miR-7042-5p	miRNA	0.0721662	0.34674	0.518503	0.607411	0.989147
MIMAT0004931	mmu-miR-466d-3p	miRNA	0.0720861	0.750121	0.402915	0.689493	0.989147
MIMAT0027339	mmu-miR-6481	miRNA	0.0719943	0.307715	0.686076	0.497242	0.989147
MIMAT0000247	mmu-miR-143-3p	miRNA	0.0713736	0.324597	0.62	0.539324	0.989147
MIMAT0027895	mmu-miR-6996-3p	miRNA	0.0709639	0.387676	0.663882	0.511171	0.989147
MIMAT0031398	mmu-miR-8096	miRNA	0.0706324	0.691274	0.389667	0.699174	0.989147
MIMAT0028084	mmu-miR-7089-5p	miRNA	0.070513	0.668467	0.578647	0.566579	0.989147
MIMAT0027971	mmu-miR-7033-3p	miRNA	0.0702091	0.33739	0.428171	0.671183	0.989147
MIMAT0014955	mmu-miR-3112-5p	miRNA	0.0701457	0.680457	0.475077	0.637721	0.989147
MIMAT0025085	mmu-miR-6342	miRNA	0.0686258	0.309626	0.712259	0.481085	0.989147
MIMAT0020624	mmu-miR-5116	miRNA	0.0685509	0.711958	0.362596	0.719115	0.989147
MIMAT0017046	mmu-miR-101b-5p	miRNA	0.0683942	0.411199	0.542489	0.590963	0.989147
MIMAT0017248	mmu-miR-679-3p	miRNA	0.0683267	0.460005	0.586574	0.561302	0.989147
MIMAT0027763	mmu-miR-6931-3p	miRNA	0.0680174	0.459575	0.480188	0.634119	0.989147
MIMAT0027698	mmu-miR-6899-5p	miRNA	0.0680155	0.878541	0.282132	0.779525	0.989147
MIMAT0027919	mmu-miR-7007-3p	miRNA	0.0680075	0.259931	0.547226	0.58774	0.989147
MIMAT0000372	mmu-miR-294-3p	miRNA	0.0677139	0.149542	0.629557	0.533125	0.989147
MIMAT0003504	mmu-miR-713	miRNA	0.067138	0.264957	0.580161	0.565569	0.989147
MIMAT0009418	mmu-miR-669l-5p	miRNA	0.0670181	0.549704	0.526505	0.6019	0.989147
MIMAT0022988	mmu-miR-5132-3p	miRNA	0.0667837	0.292343	0.599746	0.552588	0.989147
MIMAT0028012	mmu-miR-7054-5p	miRNA	0.066596	0.683742	0.529862	0.599595	0.989147
MIMAT0028389	mmu-miR-7210-3p	miRNA	0.0661236	0.515941	0.584394	0.562751	0.989147
MIMAT0027731	mmu-miR-6915-3p	miRNA	0.0660009	0.627179	0.322431	0.749069	0.989147
MIMAT0027969	mmu-miR-7032-3p	miRNA	0.0657033	0.528954	0.391408	0.697898	0.989147
MIMAT0004583	mmu-miR-130b-5p	miRNA	0.065439	0.41856	0.482322	0.632618	0.989147
MIMAT0017065	mmu-miR-19b-1-5p	miRNA	0.0652681	0.539568	0.546633	0.588143	0.989147
MIMAT0005835	mmu-miR-1b-5p	miRNA	0.0651872	0.632848	0.49225	0.625655	0.989147
MIMAT0003513	mmu-miR-505-3p	miRNA	0.065039	0.421404	0.679719	0.50121	0.989147
MIMAT0020644	mmu-miR-5133	miRNA	0.0648127	0.659003	0.3246	0.74744	0.989147
MIMAT0004821	mmu-miR-671-3p	miRNA	0.0647865	0.558992	0.488014	0.628622	0.989147
MIMAT0004892	mmu-miR-568	miRNA	0.0645927	0.547082	0.533194	0.597311	0.989147
MIMAT0027985	mmu-miR-7040-3p	miRNA	0.064558	0.333476	0.401912	0.690223	0.989147
MIMAT0000674	mmu-miR-181c-5p	miRNA	0.0641861	0.72329	0.435137	0.666168	0.989147
MIMAT0004640	mmu-miR-325-3p	miRNA	0.0636054	0.555657	0.518729	0.607256	0.989147
MIMAT0004848	mmu-miR-883a-5p	miRNA	0.0635207	0.56367	0.407764	0.685962	0.989147
MIMAT0014931	mmu-miR-344f-5p	miRNA	0.063314	0.420374	0.545911	0.588634	0.989147
MIMAT0000582	mmu-miR-338-3p	miRNA	0.0631151	0.531571	0.43742	0.664528	0.989147
MIMAT0004937	mmu-miR-875-5p	miRNA	0.0629562	0.378481	0.461235	0.64752	0.989147
MIMAT0017012	mmu-miR-192-3p	miRNA	0.0628418	0.413406	0.562145	0.577645	0.989147
MIMAT0025111	mmu-miR-6367	miRNA	0.062656	0.416082	0.565503	0.575385	0.989147
MIMAT0004187	mmu-miR-744-5p	miRNA	0.0625389	5.18	0.0399693	0.968348	0.998216
MIMAT0022353	mmu-miR-3544-5p	miRNA	0.0623974	0.603127	0.439697	0.662894	0.989147
MIMAT0027965	mmu-miR-7030-3p	miRNA	0.0620663	0.524077	0.452725	0.653576	0.989147
MIMAT0025168	mmu-miR-6414	miRNA	0.0619833	0.471734	0.437548	0.664436	0.989147
MIMAT0014897	mmu-miR-3088-5p	miRNA	0.0618882	0.406507	0.467092	0.643366	0.989147
MIMAT0014946	mmu-miR-3074-2-3p	miRNA	0.0615576	0.538579	0.437303	0.664612	0.989147
MIMAT0022382	mmu-miR-5626-3p	miRNA	0.0614036	0.450032	0.528005	0.60087	0.989147
MIMAT0027812	mmu-miR-6956-5p	miRNA	0.060902	0.938453	0.343366	0.733403	0.989147
MIMAT0031400	mmu-miR-8098	miRNA	0.0602517	0.336729	0.640344	0.526172	0.989147
MIMAT0005855	mmu-miR-467h	miRNA	0.059431	0.646289	0.356443	0.723676	0.989147
MIMAT0028041	mmu-miR-6769b-3p	miRNA	0.0592867	0.56694	0.275088	0.784886	0.989147
MIMAT0014838	mmu-miR-3066-5p	miRNA	0.0590564	0.243398	0.712798	0.480756	0.989147
MIMAT0014854	mmu-miR-3073a-5p	miRNA	0.0588955	0.519023	0.45966	0.648639	0.989147
MIMAT0027756	mmu-miR-6928-5p	miRNA	0.0585556	0.485655	0.402727	0.689629	0.989147
MIMAT0031424	mmu-miR-8118	miRNA	0.0585444	0.524017	0.44289	0.660605	0.989147
MIMAT0025145	mmu-miR-1957b	miRNA	0.0584561	0.198074	0.492699	0.625341	0.989147
MIMAT0029839	mmu-miR-7666-3p	miRNA	0.0583648	1.23006	0.168488	0.867181	0.99088
MIMAT0004842	mmu-miR-879-5p	miRNA	0.0582619	0.279919	0.482215	0.632693	0.989147
MIMAT0009415	mmu-miR-1948-3p	miRNA	0.0582523	0.650733	0.407649	0.686046	0.989147
MIMAT0009397	mmu-miR-1933-3p	miRNA	0.0581956	0.159909	0.602206	0.550968	0.989147
MIMAT0027930	mmu-miR-7013-5p	miRNA	0.0578758	0.450057	0.457647	0.650071	0.989147
MIMAT0017326	mmu-miR-1b-3p	miRNA	0.0577727	0.507042	0.466231	0.643976	0.989147
MIMAT0029885	mmu-miR-7682-3p	miRNA	0.0577537	0.675026	0.200663	0.842138	0.989147
MIMAT0000235	mmu-miR-202-3p	miRNA	0.0576687	0.513706	0.496491	0.622691	0.989147
MIMAT0022361	mmu-miR-5617-5p	miRNA	0.0576024	0.684719	0.302741	0.763902	0.989147
MIMAT0004618	mmu-miR-196a-2-3p	miRNA	0.0573381	0.338717	0.368116	0.715032	0.989147
MIMAT0003508	mmu-miR-501-5p	miRNA	0.0571445	0.362899	0.497753	0.621811	0.989147
MIMAT0017263	mmu-miR-743a-5p	miRNA	0.056819	0.599724	0.410577	0.683917	0.989147
MIMAT0014886	mmu-miR-466o-3p	miRNA	0.0564638	0.412524	0.410086	0.684273	0.989147
MIMAT0004898	mmu-miR-654-3p	miRNA	0.0564321	0.682747	0.342165	0.734299	0.989147
MIMAT0004522	mmu-miR-27b-5p	miRNA	0.0561238	0.135894	0.384245	0.703151	0.989147
MIMAT0003167	mmu-miR-540-3p	miRNA	0.0560468	0.524246	0.499991	0.62025	0.989147
MIMAT0003485	mmu-miR-455-5p	miRNA	0.055921	0.221638	0.543818	0.590058	0.989147
MIMAT0027849	mmu-miR-6973a-3p	miRNA	0.0558118	0.630111	0.325662	0.746643	0.989147
MIMAT0004521	mmu-miR-15b-3p	miRNA	0.0553877	0.556642	0.397311	0.693581	0.989147
MIMAT0004899	mmu-miR-92b-3p	miRNA	0.0553793	2.12104	0.0672017	0.946808	0.994227
MIMAT0027964	mmu-miR-7030-5p	miRNA	0.055146	0.831835	0.208884	0.835765	0.989147
MIMAT0027701	mmu-miR-6900-3p	miRNA	0.054957	0.262442	0.414612	0.680988	0.989147
MIMAT0020608	mmu-miR-5101	miRNA	0.0539873	0.325453	0.39345	0.696404	0.989147
MIMAT0017280	mmu-miR-208b-5p	miRNA	0.053614	0.25807	0.446523	0.658005	0.989147
MIMAT0009412	mmu-miR-1946a	miRNA	0.0536029	1.0212	0.216367	0.829974	0.989147
MIMAT0025122	mmu-miR-6377	miRNA	0.0528591	0.656992	0.386319	0.701628	0.989147
MIMAT0028051	mmu-miR-7072-3p	miRNA	0.0527801	0.526219	0.322072	0.749338	0.989147
MIMAT0017179	mmu-miR-365-2-5p	miRNA	0.0526924	0.437055	0.302936	0.763755	0.989147
MIMAT0004747	mmu-miR-411-5p	miRNA	0.0525776	0.518062	0.383001	0.704065	0.989147
MIMAT0004758	mmu-miR-463-3p	miRNA	0.0525027	0.454026	0.420583	0.676663	0.989147
MIMAT0029838	mmu-miR-7666-5p	miRNA	0.0521365	0.298946	0.386386	0.70158	0.989147
MIMAT0029870	mmu-miR-7678-5p	miRNA	0.0516761	0.707201	0.317603	0.752697	0.989147
MIMAT0003889	mmu-miR-758-3p	miRNA	0.051443	0.054429	0.600863	0.551852	0.989147
MIMAT0027722	mmu-miR-6911-5p	miRNA	0.0512353	0.820788	0.253665	0.801257	0.989147
MIMAT0016983	mmu-miR-130a-5p	miRNA	0.0509954	0.322068	0.452662	0.653621	0.989147
MIMAT0017172	mmu-miR-410-5p	miRNA	0.0506476	0.512286	0.470758	0.640771	0.989147
MIMAT0022362	mmu-miR-5617-3p	miRNA	0.0498623	0.503629	0.341451	0.734832	0.989147
MIMAT0017233	mmu-miR-216b-3p	miRNA	0.0494299	0.361799	0.301817	0.7646	0.989147
MIMAT0028429	mmu-miR-7230-3p	miRNA	0.0493684	0.619922	0.347593	0.730254	0.989147
MIMAT0017274	mmu-miR-466h-3p	miRNA	0.0492881	0.438403	0.370368	0.713368	0.989147
MIMAT0027713	mmu-miR-6906-3p	miRNA	0.048952	0.238395	0.438688	0.663618	0.989147
MIMAT0000246	mmu-miR-122-5p	miRNA	0.0488379	0.245598	0.367003	0.715855	0.989147
MIMAT0014863	mmu-miR-3077-3p	miRNA	0.0482934	0.242161	0.442878	0.660614	0.989147
MIMAT0000216	mmu-miR-187-3p	miRNA	0.0479487	0.317071	0.438608	0.663675	0.989147
MIMAT0025580	mmu-let-7k	miRNA	0.0474702	0.696095	0.0939423	0.925698	0.994083
MIMAT0000220	mmu-miR-190a-5p	miRNA	0.0469637	0.372151	0.420938	0.676406	0.989147
MIMAT0014847	mmu-miR-3070a-3p	miRNA	0.0469214	0.682528	0.245624	0.807426	0.989147
MIMAT0025170	mmu-miR-6416-5p	miRNA	0.0468842	0.488139	0.307091	0.760617	0.989147
MIMAT0022504	mmu-miR-5709-5p	miRNA	0.0463582	0.49295	0.412811	0.682295	0.989147
MIMAT0028009	mmu-miR-7052-3p	miRNA	0.0458016	0.411879	0.385783	0.702022	0.989147
MIMAT0014849	mmu-miR-3070b-3p	miRNA	0.045744	0.431282	0.309477	0.758817	0.989147
MIMAT0028030	mmu-miR-7063-5p	miRNA	0.0457334	0.499699	0.273961	0.785745	0.989147
MIMAT0016993	mmu-miR-155-3p	miRNA	0.0454865	0.650368	0.210714	0.834348	0.989147
MIMAT0025101	mmu-miR-6358	miRNA	0.0453445	0.469074	0.327271	0.745437	0.989147
MIMAT0017050	mmu-miR-32-3p	miRNA	0.0451624	0.413774	0.339749	0.736102	0.989147
MIMAT0017328	mmu-miR-1188-3p	miRNA	0.0450598	0.743655	0.219074	0.827881	0.989147
MIMAT0005294	mmu-miR-467e-3p	miRNA	0.0449216	0.528888	0.332761	0.741325	0.989147
MIMAT0028063	mmu-miR-7078-3p	miRNA	0.0449088	0.603195	0.344206	0.732777	0.989147
MIMAT0000208	mmu-miR-10b-5p	miRNA	0.0448513	0.655305	0.278242	0.782484	0.989147
MIMAT0027951	mmu-miR-7023-3p	miRNA	0.0447201	0.396158	0.235084	0.815531	0.989147
MIMAT0017048	mmu-miR-107-5p	miRNA	0.0446163	0.172421	0.360192	0.720896	0.989147
MIMAT0027893	mmu-miR-6995-3p	miRNA	0.0444634	0.30419	0.311802	0.757064	0.989147
MIMAT0004624	mmu-miR-15a-3p	miRNA	0.0443205	0.590785	0.330935	0.742691	0.989147
MIMAT0027912	mmu-miR-7004-5p	miRNA	0.0442082	0.567555	0.271015	0.787991	0.989147
MIMAT0022704	mmu-miR-489-5p	miRNA	0.0433707	0.380316	0.384755	0.702777	0.989147
MIMAT0028434	mmu-miR-7233-5p	miRNA	0.0432872	0.298965	0.346534	0.731043	0.989147
MIMAT0029819	mmu-miR-7656-3p	miRNA	0.0430905	0.585221	0.315367	0.754379	0.989147
MIMAT0003509	mmu-miR-501-3p	miRNA	0.0427075	1.53595	0.0707614	0.943996	0.994083
MIMAT0004186	mmu-miR-301b-3p	miRNA	0.0424903	0.497961	0.320247	0.750709	0.989147
MIMAT0014958	mmu-miR-1912-3p	miRNA	0.0424622	0.16218	0.398647	0.692606	0.989147
MIMAT0027961	mmu-miR-7028-3p	miRNA	0.0423482	0.493031	0.281928	0.77968	0.989147
MIMAT0000211	mmu-miR-182-5p	miRNA	0.042094	0.784396	0.266971	0.791078	0.989147
MIMAT0028406	mmu-miR-7219-5p	miRNA	0.0419954	0.475747	0.374673	0.710193	0.989147
MIMAT0016991	mmu-miR-152-5p	miRNA	0.041939	0.396779	0.347871	0.730047	0.989147
MIMAT0027874	mmu-miR-6986-5p	miRNA	0.0416942	0.858438	0.159059	0.874548	0.991467
MIMAT0028034	mmu-miR-7065-5p	miRNA	0.0412725	0.376138	0.2835	0.778485	0.989147
MIMAT0003738	mmu-miR-496a-3p	miRNA	0.0410539	0.723951	0.202912	0.840394	0.989147
MIMAT0029816	mmu-miR-7655-5p	miRNA	0.041049	0.413098	0.326133	0.74629	0.989147
MIMAT0027854	mmu-miR-6976-5p	miRNA	0.0406696	0.438596	0.427611	0.671587	0.989147
MIMAT0003169	mmu-miR-539-5p	miRNA	0.0404515	0.612663	0.246362	0.806859	0.989147
MIMAT0004634	mmu-miR-31-3p	miRNA	0.0400958	0.550237	0.274681	0.785197	0.989147
MIMAT0000659	mmu-miR-212-3p	miRNA	0.0398953	0.492439	0.228258	0.820791	0.989147
MIMAT0004616	mmu-miR-30c-1-3p	miRNA	0.0398941	0.304844	0.37127	0.712703	0.989147
MIMAT0003451	mmu-miR-677-5p	miRNA	0.0398543	0.302675	0.302551	0.764046	0.989147
MIMAT0004895	mmu-miR-590-5p	miRNA	0.0396878	0.278529	0.332098	0.741821	0.989147
MIMAT0028085	mmu-miR-7089-3p	miRNA	0.0395897	0.526521	0.266924	0.791114	0.989147
MIMAT0027980	mmu-miR-7038-5p	miRNA	0.0394614	0.549348	0.259049	0.797134	0.989147
MIMAT0004647	mmu-miR-338-5p	miRNA	0.0391784	0.266904	0.336743	0.738347	0.989147
MIMAT0027941	mmu-miR-7018-3p	miRNA	0.0390946	0.509229	0.19571	0.845983	0.989147
MIMAT0017209	mmu-miR-541-3p	miRNA	0.0388853	0.237288	0.314944	0.754698	0.989147
MIMAT0014891	mmu-miR-466p-5p	miRNA	0.0388386	0.658869	0.27684	0.783552	0.989147
MIMAT0004535	mmu-miR-150-3p	miRNA	0.0387549	0.576646	0.218568	0.828272	0.989147
MIMAT0029803	mmu-miR-7650-3p	miRNA	0.0383898	0.405048	0.267587	0.790608	0.989147
MIMAT0017044	mmu-miR-135b-3p	miRNA	0.0382771	0.554261	0.258583	0.797491	0.989147
MIMAT0014919	mmu-miR-3100-5p	miRNA	0.0381929	0.505199	0.226116	0.822443	0.989147
MIMAT0027846	mmu-miR-6972-5p	miRNA	0.0380586	0.976037	0.201059	0.841831	0.989147
MIMAT0009402	mmu-miR-1938	miRNA	0.0380543	0.270511	0.377431	0.708161	0.989147
MIMAT0009446	mmu-miR-1971	miRNA	0.0378565	0.743285	0.179048	0.858945	0.989147
MIMAT0025086	mmu-miR-6343	miRNA	0.0376424	0.535309	0.255629	0.799752	0.989147
MIMAT0025112	mmu-miR-6368	miRNA	0.037635	0.79567	0.0964585	0.923714	0.994083
MIMAT0017013	mmu-miR-196a-1-3p	miRNA	0.037343	0.145622	0.284416	0.777789	0.989147
MIMAT0028043	mmu-miR-7068-3p	miRNA	0.0372724	0.33431	0.393745	0.696188	0.989147
MIMAT0009444	mmu-miR-1970	miRNA	0.0369658	0.538995	0.0918229	0.927369	0.994083
MIMAT0027810	mmu-miR-6955-5p	miRNA	0.0369208	0.566166	0.246521	0.806737	0.989147
MIMAT0012771	mmu-miR-432	miRNA	0.036706	0.148915	0.360725	0.720501	0.989147
MIMAT0014830	mmu-miR-3062-5p	miRNA	0.0366345	0.423241	0.307891	0.760013	0.989147
MIMAT0027770	mmu-miR-6935-5p	miRNA	0.0365726	0.494258	0.230594	0.81899	0.989147
MIMAT0027901	mmu-miR-6999-3p	miRNA	0.0364413	0.19811	0.305431	0.76187	0.989147
MIMAT0003488	mmu-miR-698-3p	miRNA	0.0357712	0.337037	0.26912	0.789437	0.989147
MIMAT0017182	mmu-miR-450a-1-3p	miRNA	0.0354339	0.604742	0.300357	0.765704	0.989147
MIMAT0028421	mmu-miR-7226-3p	miRNA	0.035332	0.505096	0.28135	0.780119	0.989147
MIMAT0014890	mmu-miR-669p-3p	miRNA	0.0349746	0.422732	0.283736	0.778306	0.989147
MIMAT0003894	mmu-miR-764-5p	miRNA	0.0347961	0.524812	0.262357	0.794604	0.989147
MIMAT0027734	mmu-miR-6917-5p	miRNA	0.0347161	0.764272	0.181488	0.857044	0.989147
MIMAT0005853	mmu-miR-669e-5p	miRNA	0.0344538	0.709538	0.179262	0.858779	0.989147
MIMAT0003512	mmu-miR-450b-3p	miRNA	0.0341802	0.512674	0.238808	0.812665	0.989147
MIMAT0028026	mmu-miR-7061-5p	miRNA	0.0337995	0.67977	0.234287	0.816145	0.989147
MIMAT0031408	mmu-miR-8104	miRNA	0.0336776	0.340109	0.279309	0.781673	0.989147
MIMAT0009419	mmu-miR-669m-3p	miRNA	0.0336586	0.510452	0.224629	0.823591	0.989147
MIMAT0014855	mmu-miR-3073a-3p	miRNA	0.0335177	0.446256	0.279334	0.781653	0.989147
MIMAT0014960	mmu-miR-3113-3p	miRNA	0.0333924	0.43712	0.238451	0.812939	0.989147
MIMAT0017070	mmu-miR-7a-2-3p	miRNA	0.032887	0.692991	0.19119	0.849496	0.989147
MIMAT0025080	mmu-miR-6337	miRNA	0.0325658	1.2669	0.145342	0.885286	0.993357
MIMAT0004940	mmu-miR-511-5p	miRNA	0.032106	0.703193	0.188309	0.851736	0.989147
MIMAT0027974	mmu-miR-7035-5p	miRNA	0.0318348	0.618882	0.161947	0.87229	0.991411
MIMAT0003375	mmu-miR-302c-5p	miRNA	0.0315664	0.521456	0.285864	0.776689	0.989147
MIMAT0017071	mmu-miR-7b-3p	miRNA	0.0314274	0.559021	0.22748	0.821391	0.989147
MIMAT0005447	mmu-miR-449b	miRNA	0.0312134	0.42574	0.234198	0.816213	0.989147
MIMAT0029861	mmu-miR-7676-3p	miRNA	0.0310316	0.325841	0.254357	0.800727	0.989147
MIMAT0022371	mmu-miR-5622-5p	miRNA	0.0308385	0.523257	0.223883	0.824167	0.989147
MIMAT0000679	mmu-miR-217-5p	miRNA	0.0307651	0.505372	0.212086	0.833286	0.989147
MIMAT0017241	mmu-miR-672-3p	miRNA	0.0306805	0.127662	0.313458	0.755816	0.989147
MIMAT0009436	mmu-miR-1963	miRNA	0.0303909	0.63115	0.203233	0.840144	0.989147
MIMAT0017214	mmu-miR-367-5p	miRNA	0.0300738	0.347249	0.286231	0.77641	0.989147
MIMAT0014874	mmu-miR-3083-5p	miRNA	0.0300504	0.565566	0.218101	0.828633	0.989147
MIMAT0029896	mmu-miR-7685-5p	miRNA	0.0297747	0.698255	0.167885	0.867652	0.99088
MIMAT0027704	mmu-miR-6902-5p	miRNA	0.0297595	0.237814	0.281012	0.780377	0.989147
MIMAT0000593	mmu-miR-344-3p	miRNA	0.0296987	0.428288	0.193494	0.847705	0.989147
MIMAT0031399	mmu-miR-8097	miRNA	0.0296165	0.603904	0.204758	0.838962	0.989147
MIMAT0000584	mmu-miR-339-5p	miRNA	0.0294973	1.01324	0.092746	0.926641	0.994083
MIMAT0025166	mmu-miR-6413	miRNA	0.0294	-0.0192435	0.316016	0.753891	0.989147
MIMAT0014910	mmu-miR-3094-3p	miRNA	0.0293726	0.432098	0.256284	0.799251	0.989147
MIMAT0017242	mmu-miR-670-3p	miRNA	0.0293169	0.634905	0.216533	0.829845	0.989147
MIMAT0025152	mmu-miR-6400	miRNA	0.0292205	0.331392	0.251092	0.80323	0.989147
MIMAT0004890	mmu-miR-509-5p	miRNA	0.0287173	0.0610089	0.25968	0.796652	0.989147
MIMAT0004933	mmu-miR-878-3p	miRNA	0.0287095	0.430325	0.224238	0.823893	0.989147
MIMAT0031422	mmu-miR-8116	miRNA	0.0281743	1.5537	0.0744065	0.941116	0.994083
MIMAT0029911	mmu-miR-7243-3p	miRNA	0.0279039	0.433603	0.238248	0.813096	0.989147
MIMAT0017251	mmu-miR-669a-3-3p	miRNA	0.0277283	0.442473	0.231912	0.817974	0.989147
MIMAT0017001	mmu-miR-201-3p	miRNA	0.0274112	0.645926	0.19312	0.847995	0.989147
MIMAT0017058	mmu-miR-26a-2-3p	miRNA	0.027322	0.35412	0.204992	0.838781	0.989147
MIMAT0017324	mmu-miR-669d-3p	miRNA	0.0272621	0.677504	0.14156	0.888249	0.993423
MIMAT0031413	mmu-miR-8108	miRNA	0.0272151	0.803285	0.145126	0.885454	0.993357
MIMAT0027962	mmu-miR-7029-5p	miRNA	0.0264669	0.43948	0.234227	0.81619	0.989147
MIMAT0027888	mmu-miR-6993-5p	miRNA	0.0261874	0.6012	0.190494	0.850037	0.989147
MIMAT0027891	mmu-miR-6994-3p	miRNA	0.0261445	0.547506	0.242705	0.809668	0.989147
MIMAT0004897	mmu-miR-654-5p	miRNA	0.0252785	0.246841	0.2216	0.825929	0.989147
MIMAT0017284	mmu-miR-653-3p	miRNA	0.0252618	0.225508	0.254725	0.800445	0.989147
MIMAT0019339	mmu-miR-28c	miRNA	0.025003	0.285849	0.229644	0.819722	0.989147
MIMAT0022989	mmu-miR-5134-3p	miRNA	0.024804	0.553706	0.169886	0.866091	0.99088
MIMAT0029886	mmu-miR-7683-5p	miRNA	0.0247252	0.349245	0.140566	0.889029	0.993463
MIMAT0022380	mmu-miR-5625-3p	miRNA	0.0239652	0.491813	0.152418	0.879744	0.993357
MIMAT0027771	mmu-miR-6935-3p	miRNA	0.023842	0.451621	0.191543	0.849221	0.989147
MIMAT0014869	mmu-miR-3080-3p	miRNA	0.0237468	0.448081	0.181951	0.856684	0.989147
MIMAT0014916	mmu-miR-3097-3p	miRNA	0.0234741	0.555073	0.200965	0.841904	0.989147
MIMAT0000661	mmu-miR-214-3p	miRNA	0.0232078	0.573169	0.129786	0.897488	0.993463
MIMAT0017235	mmu-miR-758-5p	miRNA	0.0231527	0.513043	0.187022	0.852737	0.989147
MIMAT0027977	mmu-miR-7036-3p	miRNA	0.0231487	0.54024	0.166431	0.868788	0.99088
MIMAT0028397	mmu-miR-7214-3p	miRNA	0.023113	0.750566	0.14018	0.889332	0.993463
MIMAT0004530	mmu-miR-127-5p	miRNA	0.0229504	0.484359	0.184089	0.855019	0.989147
MIMAT0027803	mmu-miR-6951-3p	miRNA	0.0228332	0.663349	0.161757	0.872439	0.991411
MIMAT0028015	mmu-miR-7055-3p	miRNA	0.0228031	0.446119	0.126073	0.900405	0.993463
MIMAT0003739	mmu-miR-673-5p	miRNA	0.0222846	0.426217	0.178283	0.859542	0.989147
MIMAT0028423	mmu-miR-7227-3p	miRNA	0.0221632	0.508024	0.187732	0.852185	0.989147
MIMAT0017332	mmu-miR-1198-3p	miRNA	0.0220135	0.170882	0.213566	0.83214	0.989147
MIMAT0019349	mmu-miR-101c	miRNA	0.0217346	0.45217	0.146346	0.884499	0.993357
MIMAT0027766	mmu-miR-6933-5p	miRNA	0.0217003	0.554624	0.13005	0.897281	0.993463
MIMAT0029855	mmu-miR-3569-3p	miRNA	0.0216567	0.403666	0.139411	0.889934	0.993463
MIMAT0017254	mmu-miR-499-3p	miRNA	0.0216174	0.441566	0.176082	0.861257	0.989927
MIMAT0025077	mmu-miR-6335	miRNA	0.0215809	0.040635	0.2423	0.80998	0.989147
MIMAT0007880	mmu-miR-1901	miRNA	0.021567	0.378218	0.187091	0.852683	0.989147
MIMAT0029824	mmu-miR-7659-5p	miRNA	0.0212626	0.4367	0.188425	0.851646	0.989147
MIMAT0017250	mmu-miR-669b-3p	miRNA	0.0208726	0.463266	0.166026	0.869104	0.99088
MIMAT0017351	mmu-miR-1981-3p	miRNA	0.0205511	0.430153	0.134772	0.893574	0.993463
MIMAT0004642	mmu-miR-330-5p	miRNA	0.0201192	0.317699	0.15978	0.873985	0.991417
MIMAT0017231	mmu-miR-1224-3p	miRNA	0.0199073	0.810466	0.0999015	0.921	0.994083
MIMAT0014814	mmu-miR-3058-3p	miRNA	0.0198947	0.920644	0.0976764	0.922754	0.994083
MIMAT0014873	mmu-miR-3082-3p	miRNA	0.0194918	0.250989	0.165282	0.869685	0.99088
MIMAT0029792	mmu-miR-6546-5p	miRNA	0.0194178	0.487781	0.151123	0.880757	0.993357
MIMAT0017341	mmu-miR-1934-3p	miRNA	0.0193526	3.392	0.0146042	0.988432	0.998936
MIMAT0025179	mmu-miR-30f	miRNA	0.0191943	0.523173	0.178434	0.859424	0.989147
MIMAT0020610	mmu-miR-5103	miRNA	0.0190219	0.578737	0.161116	0.87294	0.991411
MIMAT0028395	mmu-miR-7213-3p	miRNA	0.0189466	0.485464	0.115286	0.908886	0.994083
MIMAT0004649	mmu-miR-339-3p	miRNA	0.0187232	0.385446	0.0908688	0.928121	0.994083
MIMAT0002108	mmu-miR-467a-3p	miRNA	0.0184077	0.511302	0.158195	0.875224	0.991643
MIMAT0029893	mmu-miR-219c-3p	miRNA	0.0182204	0.205627	0.185246	0.854119	0.989147
MIMAT0009406	mmu-miR-1941-3p	miRNA	0.01817	0.621574	0.129404	0.897788	0.993463
MIMAT0029826	mmu-miR-7660-5p	miRNA	0.018152	0.326764	0.132633	0.895253	0.993463
MIMAT0017350	mmu-miR-1968-3p	miRNA	0.0180566	0.243286	0.164895	0.869987	0.99088
MIMAT0014840	mmu-miR-3067-5p	miRNA	0.0178157	0.681743	0.115827	0.90846	0.994083
MIMAT0004545	mmu-miR-200b-5p	miRNA	0.0177941	0.721004	0.0871116	0.931086	0.994083
MIMAT0027873	mmu-miR-6985-3p	miRNA	0.0176553	0.322468	0.150693	0.881094	0.993357
MIMAT0000541	mmu-miR-96-5p	miRNA	0.0175671	0.705034	0.093854	0.925767	0.994083
MIMAT0007873	mmu-miR-1896	miRNA	0.0167075	0.822061	0.103803	0.917925	0.994083
MIMAT0011287	mmu-miR-2183	miRNA	0.0163632	0.497279	0.133261	0.89476	0.993463
MIMAT0017343	mmu-miR-1947-3p	miRNA	0.0161867	0.255894	0.125568	0.900802	0.993463
MIMAT0002111	mmu-miR-470-5p	miRNA	0.0160739	0.950534	0.0718784	0.943113	0.994083
MIMAT0027900	mmu-miR-6999-5p	miRNA	0.0160007	0.786894	0.0453512	0.964088	0.998216
MIMAT0014829	mmu-miR-3061-3p	miRNA	0.0154204	0.331688	0.123505	0.902423	0.99355
MIMAT0028135	mmu-miR-7119-5p	miRNA	0.0153035	0.735327	0.0838821	0.933634	0.994083
MIMAT0000230	mmu-miR-199a-3p	miRNA	0.0149455	0.450034	0.118016	0.906738	0.994083
MIMAT0004667	mmu-miR-199b-3p	miRNA	0.0149455	0.450034	0.118016	0.906738	0.994083
MIMAT0000544	mmu-miR-129-2-3p	miRNA	0.014917	0.580245	0.0927511	0.926637	0.994083
MIMAT0025167	mmu-miR-378d	miRNA	0.0148563	1.1079	0.033422	0.97353	0.998216
MIMAT0027848	mmu-miR-6973a-5p	miRNA	0.0144265	1.31817	0.0339783	0.97309	0.998216
MIMAT0020614	mmu-miR-3473c	miRNA	0.0143457	0.540784	0.0812976	0.935674	0.994083
MIMAT0000147	mmu-miR-135a-5p	miRNA	0.0140116	0.280055	0.119857	0.90529	0.994083
MIMAT0017349	mmu-miR-1964-5p	miRNA	0.0136577	0.32747	0.0877644	0.93057	0.994083
MIMAT0029876	mmu-miR-6715-5p	miRNA	0.0134769	0.591211	0.0973436	0.923016	0.994083
MIMAT0028092	mmu-miR-7093-5p	miRNA	0.0134498	0.130033	0.124931	0.901302	0.993463
MIMAT0004820	mmu-miR-744-3p	miRNA	0.0134163	0.440677	0.0932811	0.926219	0.994083
MIMAT0009423	mmu-miR-1952	miRNA	0.0133177	0.589359	0.0825181	0.934711	0.994083
MIMAT0004868	mmu-miR-343	miRNA	0.0132808	0.440581	0.116938	0.907586	0.994083
MIMAT0004839	mmu-miR-743b-5p	miRNA	0.0129498	0.491296	0.0890926	0.929523	0.994083
MIMAT0029834	mmu-miR-7664-5p	miRNA	0.0125801	0.246493	0.12516	0.901122	0.993463
MIMAT0004786	mmu-miR-540-5p	miRNA	0.0116575	0.57414	0.0767794	0.939242	0.994083
MIMAT0025091	mmu-miR-6348	miRNA	0.0114993	0.378074	0.0886186	0.929897	0.994083
MIMAT0004857	mmu-miR-147-3p	miRNA	0.0113824	0.567524	0.0760671	0.939804	0.994083
MIMAT0000741	mmu-miR-377-3p	miRNA	0.0106673	0.366036	0.0717198	0.943238	0.994083
MIMAT0027717	mmu-miR-6908-3p	miRNA	0.0104574	0.27736	0.0946433	0.925145	0.994083
MIMAT0000769	mmu-miR-133b-3p	miRNA	0.0101417	0.321388	0.0694125	0.945061	0.994083
MIMAT0017075	mmu-miR-361-3p	miRNA	0.00987128	0.446198	0.0699924	0.944603	0.994083
MIMAT0025141	mmu-miR-6392-5p	miRNA	0.00894624	0.461183	0.0696595	0.944866	0.994083
MIMAT0028075	mmu-miR-7084-3p	miRNA	0.00888839	0.59968	0.0646497	0.948825	0.994946
MIMAT0000371	mmu-miR-293-3p	miRNA	0.00879627	0.308638	0.0724955	0.942625	0.994083
MIMAT0000135	mmu-miR-125a-5p	miRNA	0.00869956	0.927563	0.0239516	0.981029	0.998936
MIMAT0027931	mmu-miR-7013-3p	miRNA	0.00866591	0.667685	0.0546192	0.956756	0.998216
MIMAT0025087	mmu-miR-6344	miRNA	0.00845057	0.567969	0.0698722	0.944698	0.994083
MIMAT0005443	mmu-miR-181a-2-3p	miRNA	0.00843047	0.255953	0.0748224	0.940787	0.994083
MIMAT0025162	mmu-miR-6409	miRNA	0.00814728	1.42161	0.0156594	0.987596	0.998936
MIMAT0005831	mmu-miR-669k-3p	miRNA	0.00762317	0.620195	0.048458	0.96163	0.998216
MIMAT0028061	mmu-miR-7077-3p	miRNA	0.00747175	0.471735	0.0732834	0.942003	0.994083
MIMAT0031392	mmu-miR-8091	miRNA	0.00737524	0.668966	0.0429884	0.965958	0.998216
MIMAT0025171	mmu-miR-6416-3p	miRNA	0.00704757	0.601153	0.0428769	0.966046	0.998216
MIMAT0017023	mmu-miR-98-3p	miRNA	0.00685268	0.55756	0.0445661	0.96471	0.998216
MIMAT0016986	mmu-miR-137-5p	miRNA	0.00678484	0.271418	0.0531285	0.957935	0.998216
MIMAT0027956	mmu-miR-7026-5p	miRNA	0.00677991	0.501236	0.0489387	0.96125	0.998216
MIMAT0003387	mmu-miR-376a-5p	miRNA	0.0066993	0.670753	0.0550186	0.95644	0.998216
MIMAT0027889	mmu-miR-6993-3p	miRNA	0.00655513	0.357785	0.0527249	0.958255	0.998216
MIMAT0017262	mmu-miR-741-5p	miRNA	0.00633051	0.659731	0.0468404	0.96291	0.998216
MIMAT0027837	mmu-miR-6967-3p	miRNA	0.00617224	0.536046	0.0506554	0.959892	0.998216
MIMAT0028058	mmu-miR-7076-5p	miRNA	0.00559364	0.88431	0.0239577	0.981024	0.998936
MIMAT0027881	mmu-miR-6989-3p	miRNA	0.00486745	0.41183	0.0419861	0.966751	0.998216
MIMAT0027807	mmu-miR-6953-3p	miRNA	0.00431831	0.667146	0.0314408	0.975099	0.998634
MIMAT0031394	mmu-miR-8093	miRNA	0.0040392	0.626798	0.0152034	0.987957	0.998936
MIMAT0004536	mmu-miR-151-5p	miRNA	0.00337329	1.88881	0.00363198	0.997123	0.999648
MIMAT0027944	mmu-miR-7020-5p	miRNA	0.00334896	1.10787	0.0131955	0.989548	0.998936
MIMAT0027344	mmu-miR-6516-3p	miRNA	0.00277964	0.216394	0.0264265	0.979069	0.998936
MIMAT0004871	mmu-miR-465b-5p	miRNA	0.00267332	0.537793	0.0204598	0.983794	0.998936
MIMAT0003780	mmu-miR-490-3p	miRNA	0.0024082	0.517267	0.0180582	0.985696	0.998936
MIMAT0000381	mmu-miR-34c-5p	miRNA	0.00239136	0.520728	0.0182207	0.985568	0.998936
MIMAT0011212	mmu-miR-2136	miRNA	0.00229523	0.543888	0.0169019	0.986612	0.998936
MIMAT0001421	mmu-miR-434-5p	miRNA	0.0021546	0.169364	0.0161178	0.987233	0.998936
MIMAT0025076	mmu-miR-195b	miRNA	0.00205698	0.668928	0.0147346	0.988329	0.998936
MIMAT0000677	mmu-miR-7a-5p	miRNA	0.00195512	0.417726	0.0167415	0.986739	0.998936
MIMAT0027823	mmu-miR-6961-3p	miRNA	0.00188034	0.229661	0.0147102	0.988348	0.998936
MIMAT0027793	mmu-miR-6946-3p	miRNA	0.00169779	0.643519	0.0136906	0.989156	0.998936
MIMAT0000678	mmu-miR-7b-5p	miRNA	0.00153221	0.550295	0.00996191	0.992109	0.998936
MIMAT0004889	mmu-miR-504-5p	miRNA	0.00137701	0.388704	0.0126364	0.989991	0.998936
MIMAT0028094	mmu-miR-7094-1-5p	miRNA	0.00132859	0.432283	0.0101606	0.991952	0.998936
MIMAT0000148	mmu-miR-136-5p	miRNA	0.00121826	0.57213	0.00927461	0.992653	0.998936
MIMAT0029820	mmu-miR-7657-5p	miRNA	0.00120795	0.346871	0.0110265	0.991266	0.998936
MIMAT0025104	mmu-miR-6361	miRNA	0.000769422	0.553874	0.00582307	0.995387	0.999578
MIMAT0029821	mmu-miR-7657-3p	miRNA	0.00049059	0.450674	0.00455424	0.996392	0.999648
MIMAT0028053	mmu-miR-7073-3p	miRNA	0.000444303	0.522312	0.0029357	0.997675	0.999648
MIMAT0000134	mmu-miR-124-3p	miRNA	0.00041154	0.439559	0.00286198	0.997733	0.999648
MIMAT0000904	mmu-miR-215-5p	miRNA	0.000335326	0.525844	0.00242841	0.998076	0.999648
MIMAT0028433	mmu-miR-7232-3p	miRNA	0.000144475	0.698481	0.000990516	0.999215	0.999794
MIMAT0002104	mmu-miR-463-5p	miRNA	4.89033e-05	0.574468	0.000260205	0.999794	0.999794
MIMAT0000548	mmu-miR-322-5p	miRNA	2.9324e-05	0.264961	0.000321762	0.999745	0.999794
MIMAT0017273	mmu-miR-421-5p	miRNA	-0.00113547	0.0981488	-0.011699	0.990733	0.998936
MIMAT0029836	mmu-miR-7665-5p	miRNA	-0.00113904	0.203766	-0.00741617	0.994125	0.999363
MIMAT0022381	mmu-miR-5626-5p	miRNA	-0.00115319	0.709383	-0.00646266	0.994881	0.999578
MIMAT0027693	mmu-miR-6896-3p	miRNA	-0.00173731	0.441715	-0.00813937	0.993553	0.999314
MIMAT0025078	mmu-miR-133c	miRNA	-0.00176974	0.770896	-0.0102697	0.991865	0.998936
MIMAT0025113	mmu-miR-6369	miRNA	-0.00177442	0.269119	-0.0176039	0.986056	0.998936
MIMAT0000664	mmu-miR-219a-5p	miRNA	-0.00223682	0.336864	-0.0216324	0.982866	0.998936
MIMAT0027949	mmu-miR-7022-3p	miRNA	-0.00238574	0.932937	-0.00983009	0.992213	0.998936
MIMAT0014956	mmu-miR-3112-3p	miRNA	-0.0027137	0.334937	-0.021794	0.982738	0.998936
MIMAT0027879	mmu-miR-6988-3p	miRNA	-0.00299101	0.42323	-0.0266045	0.978928	0.998936
MIMAT0028018	mmu-miR-7057-5p	miRNA	-0.00319011	0.0275254	-0.0290385	0.977001	0.998936
MIMAT0028031	mmu-miR-7063-3p	miRNA	-0.00366902	0.316792	-0.0357559	0.971683	0.998216
MIMAT0017283	mmu-miR-598-5p	miRNA	-0.00399446	0.965171	-0.0121632	0.990365	0.998936
MIMAT0003373	mmu-miR-302b-5p	miRNA	-0.0044458	0.513991	-0.0333001	0.973627	0.998216
MIMAT0000163	mmu-miR-153-3p	miRNA	-0.00459787	0.49801	-0.0350416	0.972248	0.998216
MIMAT0028093	mmu-miR-7093-3p	miRNA	-0.0047397	0.275644	-0.0468256	0.962922	0.998216
MIMAT0014917	mmu-miR-3098-5p	miRNA	-0.00520003	0.194929	-0.0446995	0.964604	0.998216
MIMAT0017066	mmu-miR-92a-1-5p	miRNA	-0.00523811	0.504375	-0.0358215	0.971631	0.998216
MIMAT0029845	mmu-miR-7669-3p	miRNA	-0.00549326	2.46089	-0.00958056	0.992411	0.998936
MIMAT0014940	mmu-miR-3104-3p	miRNA	-0.0055221	0.448308	-0.0463585	0.963291	0.998216
MIMAT0025581	mmu-miR-6537-5p	miRNA	-0.00560254	0.524986	-0.0382683	0.969694	0.998216
MIMAT0028412	mmu-miR-7222-5p	miRNA	-0.00570992	0.430562	-0.0541907	0.957095	0.998216
MIMAT0028402	mmu-miR-7217-5p	miRNA	-0.00589175	0.665238	-0.0395795	0.968656	0.998216
MIMAT0028418	mmu-miR-7225-5p	miRNA	-0.0059348	0.429141	-0.0463243	0.963318	0.998216
MIMAT0025140	mmu-miR-6391	miRNA	-0.00621088	0.564881	-0.031101	0.975368	0.998634
MIMAT0014816	mmu-miR-3099-3p	miRNA	-0.00641114	0.389254	-0.0540887	0.957176	0.998216
MIMAT0027695	mmu-miR-6897-3p	miRNA	-0.00644925	0.436323	-0.0389632	0.969144	0.998216
MIMAT0027840	mmu-miR-6969-5p	miRNA	-0.00654383	0.57968	-0.0402305	0.968141	0.998216
MIMAT0027853	mmu-miR-6975-3p	miRNA	-0.00666716	0.804943	-0.0344732	0.972698	0.998216
MIMAT0000655	mmu-miR-100-5p	miRNA	-0.00703498	0.502386	-0.0485103	0.961589	0.998216
MIMAT0004523	mmu-miR-29b-1-5p	miRNA	-0.00727403	0.286189	-0.0690656	0.945335	0.994083
MIMAT0005851	mmu-miR-1193-3p	miRNA	-0.00744787	0.575687	-0.0534026	0.957719	0.998216
MIMAT0004941	mmu-miR-544-3p	miRNA	-0.00753346	0.408594	-0.0764768	0.939481	0.994083
MIMAT0027960	mmu-miR-7028-5p	miRNA	-0.00787445	0.728659	-0.0412142	0.967362	0.998216
MIMAT0028131	mmu-miR-7117-5p	miRNA	-0.00792307	0.660423	-0.047998	0.961994	0.998216
MIMAT0031415	mmu-miR-8109	miRNA	-0.00829962	0.495534	-0.0482658	0.961782	0.998216
MIMAT0025108	mmu-miR-6364	miRNA	-0.0084272	0.509731	-0.0483795	0.961692	0.998216
MIMAT0017216	mmu-miR-487b-5p	miRNA	-0.00851218	0.442484	-0.058085	0.954015	0.998216
MIMAT0025148	mmu-miR-21c	miRNA	-0.00913343	0.136944	-0.0787166	0.937712	0.994083
MIMAT0027986	mmu-miR-7041-5p	miRNA	-0.00931543	0.670447	-0.0680348	0.94615	0.994083
MIMAT0025588	mmu-miR-6541	miRNA	-0.00937414	0.25349	-0.0940155	0.92564	0.994083
MIMAT0014947	mmu-miR-3108-5p	miRNA	-0.00960714	0.5632	-0.0643563	0.949057	0.994946
MIMAT0029900	mmu-miR-290b-5p	miRNA	-0.00967851	0.194152	-0.105166	0.916852	0.994083
MIMAT0014856	mmu-miR-3074-5p	miRNA	-0.010381	0.572786	-0.0696099	0.944905	0.994083
MIMAT0029909	mmu-miR-7689-3p	miRNA	-0.0104645	0.572325	-0.0683018	0.945939	0.994083
MIMAT0003185	mmu-miR-369-5p	miRNA	-0.011057	0.606537	-0.0744399	0.94109	0.994083
MIMAT0019341	mmu-miR-3963	miRNA	-0.011436	0.28864	-0.0843915	0.933232	0.994083
MIMAT0027839	mmu-miR-6968-3p	miRNA	-0.0115011	0.573439	-0.0693566	0.945105	0.994083
MIMAT0014934	mmu-miR-3102-5p.2-5p	miRNA	-0.0121929	0.983999	-0.0273374	0.978348	0.998936
MIMAT0005860	mmu-miR-1199-5p	miRNA	-0.0124895	0.301134	-0.108564	0.914176	0.994083
MIMAT0017243	mmu-miR-669a-3p	miRNA	-0.0128107	0.475792	-0.106123	0.916098	0.994083
MIMAT0017347	mmu-miR-669o-3p	miRNA	-0.0128107	0.475792	-0.106123	0.916098	0.994083
MIMAT0028130	mmu-miR-7116-3p	miRNA	-0.0130029	0.677199	-0.0927477	0.92664	0.994083
MIMAT0014868	mmu-miR-3080-5p	miRNA	-0.0130108	0.556226	-0.0865874	0.931499	0.994083
MIMAT0003186	mmu-miR-369-3p	miRNA	-0.0131791	0.27681	-0.0926815	0.926692	0.994083
MIMAT0029882	mmu-miR-7681-5p	miRNA	-0.0132447	0.449236	-0.104805	0.917137	0.994083
MIMAT0022503	mmu-miR-344i	miRNA	-0.0135298	0.490893	-0.0993151	0.921462	0.994083
MIMAT0027968	mmu-miR-7032-5p	miRNA	-0.0135524	0.49811	-0.1194	0.90565	0.994083
MIMAT0004526	mmu-miR-101a-5p	miRNA	-0.013662	0.650934	-0.0901224	0.92871	0.994083
MIMAT0003173	mmu-miR-547-3p	miRNA	-0.0143137	0.580294	-0.102888	0.918646	0.994083
MIMAT0027811	mmu-miR-6955-3p	miRNA	-0.0143881	0.375777	-0.111951	0.91151	0.994083
MIMAT0028408	mmu-miR-7220-5p	miRNA	-0.0146869	0.373286	-0.123542	0.902393	0.99355
MIMAT0027963	mmu-miR-7029-3p	miRNA	-0.0148648	0.347608	-0.127708	0.89912	0.993463
MIMAT0003515	mmu-miR-721	miRNA	-0.0158402	0.446677	-0.101979	0.919363	0.994083
MIMAT0000123	mmu-miR-1a-3p	miRNA	-0.0166236	0.601234	-0.13338	0.894666	0.993463
MIMAT0028024	mmu-miR-7060-5p	miRNA	-0.0166443	0.572647	-0.122481	0.903227	0.993863
MIMAT0004855	mmu-miR-876-3p	miRNA	-0.0168249	0.438825	-0.15257	0.879625	0.993357
MIMAT0025118	mmu-miR-6374	miRNA	-0.0169702	0.420122	-0.133045	0.894929	0.993463
MIMAT0022836	mmu-miR-299b-5p	miRNA	-0.0171568	0.449488	-0.115824	0.908463	0.994083
MIMAT0027784	mmu-miR-6942-5p	miRNA	-0.0172657	0.522526	-0.128368	0.898602	0.993463
MIMAT0027920	mmu-miR-7008-5p	miRNA	-0.0174517	0.751896	-0.110723	0.912477	0.994083
MIMAT0003470	mmu-miR-691	miRNA	-0.0179802	0.410848	-0.130555	0.896884	0.993463
MIMAT0004574	mmu-miR-294-5p	miRNA	-0.0181204	0.396911	-0.136683	0.892075	0.993463
MIMAT0003480	mmu-miR-297b-5p	miRNA	-0.0181431	0.265265	-0.164372	0.870395	0.99088
MIMAT0029802	mmu-miR-7650-5p	miRNA	-0.0181853	0.28749	-0.142354	0.887627	0.993357
MIMAT0003460	mmu-miR-449c-5p	miRNA	-0.018596	0.444635	-0.133845	0.894302	0.993463
MIMAT0004935	mmu-miR-872-3p	miRNA	-0.0188313	0.338859	-0.157058	0.876113	0.992062
MIMAT0004888	mmu-miR-493-3p	miRNA	-0.0190986	0.143788	-0.192534	0.848451	0.989147
MIMAT0014850	mmu-miR-3071-5p	miRNA	-0.0192685	0.390464	-0.147202	0.883828	0.993357
MIMAT0027813	mmu-miR-6956-3p	miRNA	-0.0193137	0.523917	-0.184165	0.85496	0.989147
MIMAT0005850	mmu-miR-1192	miRNA	-0.0196476	0.984822	-0.0415311	0.967111	0.998216
MIMAT0031391	mmu-miR-8090	miRNA	-0.0196642	0.403008	-0.173878	0.862975	0.990113
MIMAT0022986	mmu-miR-3572-5p	miRNA	-0.0200369	1.11017	-0.0685567	0.945738	0.994083
MIMAT0027902	mmu-miR-7000-5p	miRNA	-0.0202567	0.431611	-0.173921	0.862942	0.990113
MIMAT0027957	mmu-miR-7026-3p	miRNA	-0.020469	0.520849	-0.145879	0.884864	0.993357
MIMAT0000739	mmu-miR-375-3p	miRNA	-0.0205361	0.541633	-0.184232	0.854908	0.989147
MIMAT0003449	mmu-miR-488-5p	miRNA	-0.0207482	0.504629	-0.150049	0.881598	0.993357
MIMAT0028445	mmu-miR-7238-3p	miRNA	-0.0208413	0.682177	-0.109183	0.913689	0.994083
MIMAT0027791	mmu-miR-6945-3p	miRNA	-0.0208776	0.682807	-0.155809	0.87709	0.992519
MIMAT0000673	mmu-miR-181b-5p	miRNA	-0.0209998	1.7039	-0.0367246	0.970916	0.998216
MIMAT0004666	mmu-miR-33-3p	miRNA	-0.0213072	0.387335	-0.129125	0.898007	0.993463
MIMAT0029877	mmu-miR-6715-3p	miRNA	-0.0214666	0.544102	-0.142748	0.887318	0.993357
MIMAT0027885	mmu-miR-6991-3p	miRNA	-0.0215423	0.787257	-0.13238	0.895451	0.993463
MIMAT0004822	mmu-miR-770-5p	miRNA	-0.022153	0.40149	-0.179255	0.858784	0.989147
MIMAT0017079	mmu-miR-377-5p	miRNA	-0.022322	0.346851	-0.186625	0.853046	0.989147
MIMAT0016981	mmu-miR-99a-3p	miRNA	-0.0225057	0.424815	-0.178525	0.859353	0.989147
MIMAT0027933	mmu-miR-7014-3p	miRNA	-0.0227374	0.215542	-0.257074	0.798646	0.989147
MIMAT0027723	mmu-miR-6911-3p	miRNA	-0.0227425	0.531346	-0.166743	0.868544	0.99088
MIMAT0027692	mmu-miR-6896-5p	miRNA	-0.0228767	0.807861	-0.0775072	0.938667	0.994083
MIMAT0014905	mmu-miR-3092-5p	miRNA	-0.0229502	0.590834	-0.105683	0.916445	0.994083
MIMAT0005846	mmu-miR-467f	miRNA	-0.0231102	0.538372	-0.182339	0.856382	0.989147
MIMAT0005845	mmu-miR-466k	miRNA	-0.0234424	0.458519	-0.181097	0.85735	0.989147
MIMAT0029832	mmu-miR-7663-5p	miRNA	-0.023674	-0.0803887	-0.22884	0.820342	0.989147
MIMAT0027727	mmu-miR-6913-3p	miRNA	-0.0237339	0.361874	-0.191629	0.849154	0.989147
MIMAT0017276	mmu-miR-493-5p	miRNA	-0.0238566	0.276155	-0.21173	0.833561	0.989147
MIMAT0004827	mmu-miR-297b-3p	miRNA	-0.0239685	0.365309	-0.200321	0.842404	0.989147
MIMAT0004864	mmu-miR-297a-3p	miRNA	-0.0239685	0.365309	-0.200321	0.842404	0.989147
MIMAT0004866	mmu-miR-297c-3p	miRNA	-0.0239685	0.365309	-0.200321	0.842404	0.989147
MIMAT0027913	mmu-miR-7004-3p	miRNA	-0.0241847	0.802516	-0.0834826	0.933949	0.994083
MIMAT0027753	mmu-miR-6926-3p	miRNA	-0.0245175	0.201556	-0.220772	0.826569	0.989147
MIMAT0004629	mmu-miR-22-5p	miRNA	-0.0246934	0.243117	-0.183501	0.855477	0.989147
MIMAT0004519	mmu-let-7g-3p	miRNA	-0.0248046	0.530744	-0.209215	0.835509	0.989147
MIMAT0009442	mmu-miR-1969	miRNA	-0.0248308	0.301978	-0.193251	0.847893	0.989147
MIMAT0028003	mmu-miR-7049-3p	miRNA	-0.0253807	0.391375	-0.204006	0.839545	0.989147
MIMAT0000382	mmu-miR-34b-5p	miRNA	-0.0254133	0.666731	-0.190887	0.849731	0.989147
MIMAT0003458	mmu-miR-681	miRNA	-0.0255665	0.471845	-0.253862	0.801107	0.989147
MIMAT0027938	mmu-miR-7017-5p	miRNA	-0.0258311	0.715003	-0.188091	0.851905	0.989147
MIMAT0017018	mmu-miR-16-2-3p	miRNA	-0.0259931	0.443055	-0.184553	0.854658	0.989147
MIMAT0027820	mmu-miR-6960-5p	miRNA	-0.0264074	0.29844	-0.199553	0.842999	0.989147
MIMAT0001533	mmu-miR-448-3p	miRNA	-0.026488	0.683034	-0.194982	0.846549	0.989147
MIMAT0028427	mmu-miR-7229-3p	miRNA	-0.0267889	0.246358	-0.234607	0.815898	0.989147
MIMAT0000667	mmu-miR-33-5p	miRNA	-0.0269466	0.351612	-0.203331	0.840069	0.989147
MIMAT0014839	mmu-miR-3066-3p	miRNA	-0.0270471	0.431473	-0.216921	0.829545	0.989147
MIMAT0028007	mmu-miR-7051-3p	miRNA	-0.027565	0.353823	-0.241436	0.810644	0.989147
MIMAT0027982	mmu-miR-7039-5p	miRNA	-0.0283524	0.56329	-0.160165	0.873684	0.991417
MIMAT0029851	mmu-miR-7672-3p	miRNA	-0.028643	0.566175	-0.208386	0.836151	0.989147
MIMAT0027989	mmu-miR-7042-3p	miRNA	-0.0288045	0.297088	-0.259747	0.7966	0.989147
MIMAT0009439	mmu-miR-1966-5p	miRNA	-0.0290358	0.650593	-0.208009	0.836443	0.989147
MIMAT0025158	mmu-miR-496b	miRNA	-0.0293975	0.35823	-0.244875	0.808002	0.989147
MIMAT0003493	mmu-miR-703	miRNA	-0.0300807	0.580301	-0.242723	0.809654	0.989147
MIMAT0022690	mmu-miR-184-5p	miRNA	-0.030336	0.0838755	-0.341213	0.735009	0.989147
MIMAT0022505	mmu-miR-5710	miRNA	-0.0304012	0.540904	-0.246453	0.80679	0.989147
MIMAT0027867	mmu-miR-6982-3p	miRNA	-0.030864	0.332319	-0.228849	0.820335	0.989147
MIMAT0016980	mmu-miR-23b-5p	miRNA	-0.0309095	0.646527	-0.189588	0.850741	0.989147
MIMAT0029890	mmu-miR-7684-5p	miRNA	-0.0310034	0.497764	-0.163368	0.87118	0.991181
MIMAT0001418	mmu-miR-431-5p	miRNA	-0.0312359	0.54842	-0.258625	0.797459	0.989147
MIMAT0017178	mmu-miR-429-5p	miRNA	-0.0314479	0.636782	-0.206116	0.83791	0.989147
MIMAT0003732	mmu-miR-668-3p	miRNA	-0.0315908	0.60956	-0.1843	0.854855	0.989147
MIMAT0014942	mmu-miR-3105-3p	miRNA	-0.0317093	0.573554	-0.221077	0.826333	0.989147
MIMAT0027738	mmu-miR-6919-5p	miRNA	-0.0318374	0.340301	-0.231166	0.818549	0.989147
MIMAT0009457	mmu-miR-1839-3p	miRNA	-0.0320418	0.316379	-0.333061	0.7411	0.989147
MIMAT0027927	mmu-miR-7011-3p	miRNA	-0.0326113	0.43346	-0.208591	0.835992	0.989147
MIMAT0014806	mmu-miR-1843a-3p	miRNA	-0.0326259	0.567753	-0.210547	0.834477	0.989147
MIMAT0027705	mmu-miR-6902-3p	miRNA	-0.0329074	0.394043	-0.271919	0.787302	0.989147
MIMAT0004663	mmu-miR-200c-5p	miRNA	-0.0329101	0.443991	-0.284007	0.778099	0.989147
MIMAT0025146	mmu-miR-6395	miRNA	-0.0329741	1.51251	-0.0632598	0.949924	0.995308
MIMAT0027829	mmu-miR-6964-3p	miRNA	-0.0332499	0.464704	-0.299821	0.76611	0.989147
MIMAT0025128	mmu-miR-6382	miRNA	-0.0332646	0.422599	-0.210577	0.834454	0.989147
MIMAT0031421	mmu-miR-8115	miRNA	-0.0332866	0.547909	-0.18941	0.85088	0.989147
MIMAT0004790	mmu-miR-503-3p	miRNA	-0.0332948	0.509738	-0.23826	0.813086	0.989147
MIMAT0017025	mmu-miR-103-2-5p	miRNA	-0.0335442	0.587178	-0.234409	0.816051	0.989147
MIMAT0014813	mmu-miR-3058-5p	miRNA	-0.0339148	0.627149	-0.188183	0.851834	0.989147
MIMAT0028443	mmu-miR-7237-3p	miRNA	-0.0343515	0.403341	-0.265503	0.792199	0.989147
MIMAT0004575	mmu-miR-295-5p	miRNA	-0.0344652	0.331177	-0.300373	0.765692	0.989147
MIMAT0003181	mmu-miR-367-3p	miRNA	-0.0349701	0.268023	-0.285647	0.776853	0.989147
MIMAT0017270	mmu-miR-18b-3p	miRNA	-0.0350775	0.580283	-0.278743	0.782103	0.989147
MIMAT0025094	mmu-miR-6351	miRNA	-0.0352459	0.243688	-0.252799	0.801921	0.989147
MIMAT0028448	mmu-miR-7240-5p	miRNA	-0.0353132	0.595043	-0.26922	0.789361	0.989147
MIMAT0004845	mmu-miR-881-5p	miRNA	-0.0353552	0.619612	-0.259289	0.796951	0.989147
MIMAT0029884	mmu-miR-7682-5p	miRNA	-0.0355275	0.656532	-0.256989	0.798711	0.989147
MIMAT0003730	mmu-miR-592-5p	miRNA	-0.0355584	0.200049	-0.310551	0.758007	0.989147
MIMAT0000588	mmu-miR-341-3p	miRNA	-0.0355846	0.543373	-0.252144	0.802423	0.989147
MIMAT0027847	mmu-miR-6972-3p	miRNA	-0.036246	0.136568	-0.294007	0.770511	0.989147
MIMAT0017016	mmu-let-7e-3p	miRNA	-0.0364244	0.4612	-0.217856	0.828823	0.989147
MIMAT0019356	mmu-miR-3971	miRNA	-0.0365016	0.635453	-0.277405	0.783122	0.989147
MIMAT0019353	mmu-miR-3969	miRNA	-0.0366791	0.0174379	-0.380028	0.70625	0.989147
MIMAT0014825	mmu-miR-1251-3p	miRNA	-0.0366891	0.514088	-0.279426	0.781584	0.989147
MIMAT0025155	mmu-miR-6403	miRNA	-0.0367254	0.168029	-0.282228	0.779452	0.989147
MIMAT0028054	mmu-miR-7074-5p	miRNA	-0.0369933	0.717921	-0.211226	0.833951	0.989147
MIMAT0014951	mmu-miR-3110-5p	miRNA	-0.0370972	0.492235	-0.341252	0.73498	0.989147
MIMAT0028451	mmu-miR-7241-3p	miRNA	-0.0374285	0.54626	-0.291284	0.772575	0.989147
MIMAT0009426	mmu-miR-1955-5p	miRNA	-0.0374377	0.681877	-0.201188	0.841731	0.989147
MIMAT0029842	mmu-miR-7668-5p	miRNA	-0.0374679	0.290548	-0.296088	0.768935	0.989147
MIMAT0004844	mmu-miR-880-3p	miRNA	-0.0375197	0.240087	-0.327977	0.744908	0.989147
MIMAT0027939	mmu-miR-7017-3p	miRNA	-0.0375736	0.474572	-0.248316	0.805359	0.989147
MIMAT0014925	mmu-miR-344b-5p	miRNA	-0.0378156	0.608803	-0.217326	0.829232	0.989147
MIMAT0003453	mmu-miR-497-5p	miRNA	-0.0380842	0.402414	-0.28097	0.780409	0.989147
MIMAT0028090	mmu-miR-7092-5p	miRNA	-0.0382383	1.2233	-0.0989559	0.921745	0.994083
MIMAT0029908	mmu-miR-7689-5p	miRNA	-0.0383936	0.384081	-0.276877	0.783524	0.989147
MIMAT0029894	mmu-miR-126b-5p	miRNA	-0.0385968	0.796616	-0.219566	0.827501	0.989147
MIMAT0000239	mmu-miR-206-3p	miRNA	-0.0386937	0.243066	-0.323945	0.747932	0.989147
MIMAT0005292	mmu-miR-582-3p	miRNA	-0.0387397	0.404991	-0.374039	0.71066	0.989147
MIMAT0004896	mmu-miR-590-3p	miRNA	-0.038871	0.718081	-0.18938	0.850903	0.989147
MIMAT0027779	mmu-miR-6939-3p	miRNA	-0.0388762	0.460368	-0.313748	0.755599	0.989147
MIMAT0014922	mmu-miR-3101-3p	miRNA	-0.0389049	0.146625	-0.355465	0.724401	0.989147
MIMAT0028060	mmu-miR-7077-5p	miRNA	-0.0396292	0.442203	-0.209605	0.835207	0.989147
MIMAT0027887	mmu-miR-6992-3p	miRNA	-0.0397929	0.28005	-0.344661	0.732438	0.989147
MIMAT0027940	mmu-miR-7018-5p	miRNA	-0.0401368	1.02095	-0.0929625	0.92647	0.994083
MIMAT0004538	mmu-miR-10b-3p	miRNA	-0.0402481	0.252309	-0.363073	0.718761	0.989147
MIMAT0022375	mmu-miR-3073b-5p	miRNA	-0.0407253	0.221443	-0.35078	0.727883	0.989147
MIMAT0027903	mmu-miR-7000-3p	miRNA	-0.0408503	0.51244	-0.293358	0.771003	0.989147
MIMAT0017007	mmu-miR-298-3p	miRNA	-0.0409338	0.242688	-0.309664	0.758676	0.989147
MIMAT0003507	mmu-miR-500-3p	miRNA	-0.0409959	1.40959	-0.0902209	0.928633	0.994083
MIMAT0017019	mmu-miR-23a-5p	miRNA	-0.0414004	0.48461	-0.167914	0.867629	0.99088
MIMAT0027935	mmu-miR-7015-3p	miRNA	-0.0414539	0.47324	-0.317472	0.752796	0.989147
MIMAT0000153	mmu-miR-141-3p	miRNA	-0.0414648	0.506863	-0.317362	0.752878	0.989147
MIMAT0028420	mmu-miR-7226-5p	miRNA	-0.0415988	0.411968	-0.333895	0.740476	0.989147
MIMAT0020641	mmu-miR-5130	miRNA	-0.0416296	4.06067	-0.0308018	0.975605	0.998634
MIMAT0027929	mmu-miR-7012-3p	miRNA	-0.0420613	0.444282	-0.414815	0.680841	0.989147
MIMAT0003736	mmu-miR-670-5p	miRNA	-0.0421729	0.455972	-0.341266	0.734969	0.989147
MIMAT0017081	mmu-miR-381-5p	miRNA	-0.0421835	0.617068	-0.302334	0.76421	0.989147
MIMAT0016982	mmu-miR-128-1-5p	miRNA	-0.0423176	0.417305	-0.369465	0.714036	0.989147
MIMAT0027898	mmu-miR-6998-5p	miRNA	-0.0426293	0.571166	-0.247988	0.805611	0.989147
MIMAT0019340	mmu-miR-3962	miRNA	-0.0428274	0.735149	-0.233337	0.816876	0.989147
MIMAT0000542	mmu-miR-34a-5p	miRNA	-0.0429254	0.435646	-0.327792	0.745046	0.989147
MIMAT0000536	mmu-miR-29c-3p	miRNA	-0.0432258	0.488947	-0.344801	0.732334	0.989147
MIMAT0025177	mmu-miR-873b	miRNA	-0.0434607	0.136668	-0.352048	0.72694	0.989147
MIMAT0003502	mmu-miR-712-5p	miRNA	-0.0436024	0.759361	-0.270436	0.788434	0.989147
MIMAT0022377	mmu-miR-5624-5p	miRNA	-0.043665	0.574919	-0.292918	0.771336	0.989147
MIMAT0028452	mmu-miR-7242-5p	miRNA	-0.043828	0.429797	-0.362788	0.718973	0.989147
MIMAT0028065	mmu-miR-7079-3p	miRNA	-0.0440018	0.321757	-0.373159	0.711309	0.989147
MIMAT0000609	mmu-miR-351-5p	miRNA	-0.0440223	1.28719	-0.119956	0.905213	0.994083
MIMAT0014937	mmu-miR-3103-5p	miRNA	-0.0440696	0.530892	-0.318589	0.751956	0.989147
MIMAT0027906	mmu-miR-7002-5p	miRNA	-0.0442805	1.27764	-0.176552	0.860891	0.989927
MIMAT0014822	mmu-miR-3057-5p	miRNA	-0.0443176	0.481577	-0.244738	0.808107	0.989147
MIMAT0029795	mmu-miR-7646-3p	miRNA	-0.0444437	0.329141	-0.320344	0.750636	0.989147
MIMAT0003729	mmu-miR-216b-5p	miRNA	-0.0445247	0.451172	-0.361654	0.719812	0.989147
MIMAT0014819	mmu-miR-344d-1-5p	miRNA	-0.0447247	0.57031	-0.283912	0.778172	0.989147
MIMAT0004532	mmu-miR-136-3p	miRNA	-0.0447273	0.528664	-0.413203	0.68201	0.989147
MIMAT0028426	mmu-miR-7229-5p	miRNA	-0.0448681	0.654828	-0.308867	0.759277	0.989147
MIMAT0017173	mmu-miR-412-5p	miRNA	-0.0450474	0.674228	-0.297136	0.768141	0.989147
MIMAT0003494	mmu-miR-704	miRNA	-0.04531	0.425149	-0.339126	0.736567	0.989147
MIMAT0020616	mmu-miR-5108	miRNA	-0.045386	0.394273	-0.339517	0.736275	0.989147
MIMAT0004684	mmu-miR-362-3p	miRNA	-0.0457503	0.328887	-0.398719	0.692553	0.989147
MIMAT0017333	mmu-miR-1199-3p	miRNA	-0.045756	0.461589	-0.230408	0.819134	0.989147
MIMAT0014851	mmu-miR-3071-3p	miRNA	-0.0460843	0.705887	-0.271531	0.787598	0.989147
MIMAT0014859	mmu-miR-3075-3p	miRNA	-0.0462082	0.677174	-0.310288	0.758206	0.989147
MIMAT0000143	mmu-miR-9-3p	miRNA	-0.0462743	0.647283	-0.368321	0.71488	0.989147
MIMAT0004867	mmu-miR-327	miRNA	-0.0463184	0.44814	-0.295497	0.769382	0.989147
MIMAT0027835	mmu-miR-6966-3p	miRNA	-0.0463636	0.633694	-0.320857	0.750251	0.989147
MIMAT0014912	mmu-miR-3095-3p	miRNA	-0.0465746	0.262046	-0.462672	0.646499	0.989147
MIMAT0028428	mmu-miR-7230-5p	miRNA	-0.0466225	0.203637	-0.3618	0.719705	0.989147
MIMAT0029857	mmu-miR-7674-3p	miRNA	-0.0468245	0.571868	-0.3093	0.758951	0.989147
MIMAT0004753	mmu-miR-431-3p	miRNA	-0.047346	0.455765	-0.352254	0.726787	0.989147
MIMAT0017054	mmu-miR-216a-3p	miRNA	-0.0483768	0.180129	-0.417756	0.67871	0.989147
MIMAT0014811	mmu-miR-3059-5p	miRNA	-0.0487646	0.947982	-0.226806	0.821911	0.989147
MIMAT0017266	mmu-miR-880-5p	miRNA	-0.0488237	0.612294	-0.285343	0.777084	0.989147
MIMAT0020605	mmu-miR-5098	miRNA	-0.0494812	0.415727	-0.37107	0.71285	0.989147
MIMAT0004542	mmu-miR-191-3p	miRNA	-0.0494814	0.249844	-0.452466	0.65376	0.989147
MIMAT0027741	mmu-miR-6920-3p	miRNA	-0.0497023	0.652035	-0.26672	0.79127	0.989147
MIMAT0000743	mmu-miR-379-5p	miRNA	-0.050061	0.416281	-0.406813	0.686653	0.989147
MIMAT0003733	mmu-miR-665-3p	miRNA	-0.0500782	0.448593	-0.434468	0.666649	0.989147
MIMAT0027953	mmu-miR-7024-3p	miRNA	-0.0506636	0.489874	-0.320084	0.750832	0.989147
MIMAT0014901	mmu-miR-3090-5p	miRNA	-0.0506754	1.04271	-0.105362	0.916697	0.994083
MIMAT0029903	mmu-miR-7687-3p	miRNA	-0.050809	0.440531	-0.394788	0.695425	0.989147
MIMAT0014896	mmu-miR-3087-3p	miRNA	-0.0517803	0.664112	-0.358527	0.72213	0.989147
MIMAT0004942	mmu-miR-598-3p	miRNA	-0.0518392	0.427833	-0.428545	0.670914	0.989147
MIMAT0000370	mmu-miR-292-3p	miRNA	-0.0521891	0.6498	-0.317466	0.7528	0.989147
MIMAT0004617	mmu-miR-148a-5p	miRNA	-0.0522038	0.498578	-0.447474	0.657325	0.989147
MIMAT0003487	mmu-miR-697	miRNA	-0.0522399	0.277841	-0.447359	0.657407	0.989147
MIMAT0000236	mmu-miR-203-3p	miRNA	-0.0524486	0.512963	-0.357543	0.722859	0.989147
MIMAT0004843	mmu-miR-879-3p	miRNA	-0.0524604	0.478023	-0.469198	0.641875	0.989147
MIMAT0005839	mmu-miR-669f-3p	miRNA	-0.052511	0.562186	-0.333357	0.740879	0.989147
MIMAT0027736	mmu-miR-6918-5p	miRNA	-0.05273	0.33656	-0.358788	0.721936	0.989147
MIMAT0004236	mmu-miR-741-3p	miRNA	-0.0530359	0.549084	-0.448232	0.656783	0.989147
MIMAT0017060	mmu-miR-221-5p	miRNA	-0.0533433	0.523284	-0.37928	0.7068	0.989147
MIMAT0017234	mmu-miR-592-3p	miRNA	-0.0533908	0.378001	-0.478568	0.63526	0.989147
MIMAT0004854	mmu-miR-876-5p	miRNA	-0.0537621	0.723222	-0.276362	0.783916	0.989147
MIMAT0028415	mmu-miR-7223-3p	miRNA	-0.0539125	0.363959	-0.449625	0.655788	0.989147
MIMAT0000133	mmu-miR-101a-3p	miRNA	-0.0540483	0.409869	-0.389248	0.69948	0.989147
MIMAT0027860	mmu-miR-6979-5p	miRNA	-0.0542061	0.250823	-0.397717	0.693285	0.989147
MIMAT0027817	mmu-miR-6958-3p	miRNA	-0.0545351	0.30066	-0.629949	0.532871	0.989147
MIMAT0000740	mmu-miR-376a-3p	miRNA	-0.0545939	0.409186	-0.407073	0.686464	0.989147
MIMAT0027865	mmu-miR-6981-3p	miRNA	-0.0547757	0.663822	-0.358156	0.722405	0.989147
MIMAT0022369	mmu-miR-5621-5p	miRNA	-0.0548507	0.480516	-0.341656	0.734679	0.989147
MIMAT0028404	mmu-miR-7218-5p	miRNA	-0.0554027	0.652327	-0.397415	0.693505	0.989147
MIMAT0027785	mmu-miR-6942-3p	miRNA	-0.0554195	0.0617435	-0.486143	0.629934	0.989147
MIMAT0029849	mmu-miR-7671-3p	miRNA	-0.0556339	2.59555	-0.0765896	0.939392	0.994083
MIMAT0000378	mmu-miR-300-3p	miRNA	-0.0559265	0.488035	-0.531645	0.598372	0.989147
MIMAT0029901	mmu-miR-290b-3p	miRNA	-0.056141	0.51578	-0.455788	0.651393	0.989147
MIMAT0028431	mmu-miR-7231-3p	miRNA	-0.0562085	0.47957	-0.467744	0.642903	0.989147
MIMAT0017047	mmu-miR-1a-2-5p	miRNA	-0.0564038	0.287649	-0.507318	0.615153	0.989147
MIMAT0004841	mmu-miR-871-5p	miRNA	-0.0564288	0.564163	-0.421865	0.675736	0.989147
MIMAT0017067	mmu-miR-181b-1-3p	miRNA	-0.0564609	0.385633	-0.449502	0.655876	0.989147
MIMAT0004894	mmu-miR-574-3p	miRNA	-0.0566705	0.689589	-0.227021	0.821745	0.989147
MIMAT0027827	mmu-miR-6963-3p	miRNA	-0.0571705	0.731346	-0.316477	0.753544	0.989147
MIMAT0004539	mmu-miR-183-3p	miRNA	-0.057444	0.519452	-0.422449	0.675314	0.989147
MIMAT0003128	mmu-miR-485-5p	miRNA	-0.0576916	0.388769	-0.367906	0.715187	0.989147
MIMAT0027856	mmu-miR-6977-5p	miRNA	-0.0577876	0.923904	-0.143977	0.886355	0.993357
MIMAT0014836	mmu-miR-3065-5p	miRNA	-0.0579048	0.590145	-0.373023	0.711409	0.989147
MIMAT0027733	mmu-miR-6916-3p	miRNA	-0.0584715	0.446868	-0.44469	0.659316	0.989147
MIMAT0027997	mmu-miR-7046-3p	miRNA	-0.0584795	0.736749	-0.320128	0.750798	0.989147
MIMAT0003170	mmu-miR-541-5p	miRNA	-0.0585818	0.662814	-0.378531	0.707351	0.989147
MIMAT0005438	mmu-miR-30c-2-3p	miRNA	-0.0586194	0.541898	-0.449057	0.656194	0.989147
MIMAT0004656	mmu-miR-345-3p	miRNA	-0.0599309	1.24562	-0.230173	0.819314	0.989147
MIMAT0000747	mmu-miR-382-5p	miRNA	-0.0605723	0.481712	-0.384879	0.702685	0.989147
MIMAT0001422	mmu-miR-434-3p	miRNA	-0.0607861	0.821496	-0.286206	0.776429	0.989147
MIMAT0025079	mmu-miR-6336	miRNA	-0.0609708	0.467723	-0.38397	0.703353	0.989147
MIMAT0027828	mmu-miR-6964-5p	miRNA	-0.061874	0.00171721	-0.554609	0.582734	0.989147
MIMAT0000139	mmu-miR-127-3p	miRNA	-0.0620708	0.493575	-0.551667	0.584726	0.989147
MIMAT0027958	mmu-miR-7027-5p	miRNA	-0.0628792	0.275435	-0.493822	0.624556	0.989147
MIMAT0027947	mmu-miR-7021-3p	miRNA	-0.0629794	0.135228	-0.534909	0.596138	0.989147
MIMAT0014867	mmu-miR-3079-3p	miRNA	-0.0630138	0.426444	-0.527759	0.601039	0.989147
MIMAT0003498	mmu-miR-708-3p	miRNA	-0.0631782	0.341873	-0.446056	0.658339	0.989147
MIMAT0027841	mmu-miR-6969-3p	miRNA	-0.0633264	0.109689	-0.550407	0.58558	0.989147
MIMAT0025127	mmu-miR-6381	miRNA	-0.0633735	0.704198	-0.376692	0.708706	0.989147
MIMAT0027697	mmu-miR-6898-3p	miRNA	-0.063581	0.39656	-0.50521	0.616618	0.989147
MIMAT0003474	mmu-miR-694	miRNA	-0.0637087	0.526197	-0.456313	0.65102	0.989147
MIMAT0028399	mmu-miR-7215-3p	miRNA	-0.0638227	0.647527	-0.325852	0.746501	0.989147
MIMAT0017325	mmu-miR-466i-5p	miRNA	-0.0640517	1.67178	-0.145546	0.885126	0.993357
MIMAT0027730	mmu-miR-6915-5p	miRNA	-0.0641084	0.530918	-0.463773	0.645718	0.989147
MIMAT0014959	mmu-miR-3113-5p	miRNA	-0.0642454	0.491874	-0.551718	0.584691	0.989147
MIMAT0003461	mmu-miR-683	miRNA	-0.0643583	0.671848	-0.452718	0.653581	0.989147
MIMAT0017207	mmu-miR-543-5p	miRNA	-0.0646762	0.106594	-0.61904	0.539949	0.989147
MIMAT0003112	mmu-miR-489-3p	miRNA	-0.0648461	0.72651	-0.421965	0.675664	0.989147
MIMAT0027721	mmu-miR-6910-3p	miRNA	-0.0650099	0.550677	-0.50869	0.614202	0.989147
MIMAT0004580	mmu-miR-34c-3p	miRNA	-0.0651834	0.652783	-0.364877	0.717426	0.989147
MIMAT0000150	mmu-miR-138-5p	miRNA	-0.0656545	0.12098	-0.611279	0.545015	0.989147
MIMAT0003896	mmu-miR-763	miRNA	-0.0659854	0.473035	-0.45697	0.650552	0.989147
MIMAT0028044	mmu-miR-7069-5p	miRNA	-0.0662546	1.52542	-0.102864	0.918665	0.994083
MIMAT0014957	mmu-miR-1912-5p	miRNA	-0.0662882	0.434636	-0.573269	0.570174	0.989147
MIMAT0017052	mmu-miR-210-5p	miRNA	-0.0663718	0.760267	-0.307707	0.760152	0.989147
MIMAT0014900	mmu-miR-3089-3p	miRNA	-0.0663749	0.351543	-0.492516	0.625469	0.989147
MIMAT0027794	mmu-miR-6947-5p	miRNA	-0.0665441	0.426992	-0.563396	0.576803	0.989147
MIMAT0027909	mmu-miR-6973b-3p	miRNA	-0.0666348	0.502869	-0.516112	0.609063	0.989147
MIMAT0025149	mmu-miR-6397	miRNA	-0.0668532	0.29407	-0.512003	0.611905	0.989147
MIMAT0017265	mmu-miR-871-3p	miRNA	-0.0671496	0.563912	-0.378223	0.707578	0.989147
MIMAT0022715	mmu-miR-449c-3p	miRNA	-0.067951	0.406008	-0.588726	0.559873	0.989147
MIMAT0017169	mmu-miR-215-3p	miRNA	-0.0680684	0.424865	-0.520484	0.606045	0.989147
MIMAT0027797	mmu-miR-6948-3p	miRNA	-0.0682721	0.420916	-0.520035	0.606354	0.989147
MIMAT0000558	mmu-miR-325-5p	miRNA	-0.0687896	0.439511	-0.473408	0.638899	0.989147
MIMAT0027104	mmu-miR-5709-3p	miRNA	-0.0689005	0.422565	-0.628702	0.533677	0.989147
MIMAT0014895	mmu-miR-3087-5p	miRNA	-0.0692475	1.24823	-0.128844	0.898228	0.993463
MIMAT0029840	mmu-miR-7667-5p	miRNA	-0.0693992	0.452058	-0.436214	0.665394	0.989147
MIMAT0028078	mmu-miR-7086-5p	miRNA	-0.0696581	0.761519	-0.457755	0.649993	0.989147
MIMAT0029814	mmu-miR-7654-5p	miRNA	-0.0698374	0.538219	-0.542618	0.590875	0.989147
MIMAT0004631	mmu-miR-29a-5p	miRNA	-0.0698726	0.665033	-0.395546	0.694871	0.989147
MIMAT0025133	mmu-miR-6386	miRNA	-0.0700159	0.618336	-0.40038	0.691341	0.989147
MIMAT0004838	mmu-miR-742-5p	miRNA	-0.0703	0.396554	-0.57216	0.570917	0.989147
MIMAT0029883	mmu-miR-7681-3p	miRNA	-0.07084	0.672762	-0.300589	0.765529	0.989147
MIMAT0000665	mmu-miR-223-3p	miRNA	-0.0712389	0.737693	-0.319781	0.751059	0.989147
MIMAT0028002	mmu-miR-7049-5p	miRNA	-0.0714832	0.595826	-0.473396	0.638907	0.989147
MIMAT0000127	mmu-miR-29b-3p	miRNA	-0.0721937	0.445474	-0.726751	0.472272	0.989147
MIMAT0019338	mmu-miR-3961	miRNA	-0.0722649	0.370466	-0.667765	0.508718	0.989147
MIMAT0027726	mmu-miR-6913-5p	miRNA	-0.072742	0.449399	-0.51322	0.611063	0.989147
MIMAT0003741	mmu-miR-674-3p	miRNA	-0.0729138	0.629129	-0.495456	0.623414	0.989147
MIMAT0005852	mmu-miR-1194	miRNA	-0.072974	0.388957	-0.732131	0.469024	0.989147
MIMAT0017260	mmu-miR-652-5p	miRNA	-0.0731125	0.430599	-0.399018	0.692335	0.989147
MIMAT0027967	mmu-miR-7031-3p	miRNA	-0.0742189	0.377856	-0.614266	0.543062	0.989147
MIMAT0009434	mmu-miR-1961	miRNA	-0.0743435	0.586832	-0.545794	0.588714	0.989147
MIMAT0027852	mmu-miR-6975-5p	miRNA	-0.0745517	0.571839	-0.464088	0.645494	0.989147
MIMAT0019346	mmu-miR-1843b-3p	miRNA	-0.0751119	0.690304	-0.509328	0.613759	0.989147
MIMAT0009395	mmu-miR-1932	miRNA	-0.0751607	0.824635	-0.396169	0.694416	0.989147
MIMAT0001542	mmu-miR-449a-5p	miRNA	-0.0756636	0.396075	-0.533578	0.597049	0.989147
MIMAT0025172	mmu-miR-6417	miRNA	-0.075737	0.400373	-0.675217	0.50403	0.989147
MIMAT0004885	mmu-miR-467c-5p	miRNA	-0.0759936	0.408545	-0.72506	0.473296	0.989147
MIMAT0017021	mmu-miR-96-3p	miRNA	-0.0760204	0.378835	-0.660807	0.513117	0.989147
MIMAT0022384	mmu-miR-344h-3p	miRNA	-0.0761069	0.590488	-0.611233	0.545045	0.989147
MIMAT0027899	mmu-miR-6998-3p	miRNA	-0.0771104	0.67251	-0.56922	0.572888	0.989147
MIMAT0000223	mmu-miR-193a-3p	miRNA	-0.0772755	0.226093	-0.686572	0.496933	0.989147
MIMAT0016985	mmu-miR-134-3p	miRNA	-0.0774526	0.383808	-0.661183	0.512878	0.989147
MIMAT0029829	mmu-miR-7661-3p	miRNA	-0.0774781	0.658916	-0.607747	0.547328	0.989147
MIMAT0025121	mmu-miR-21b	miRNA	-0.0776568	0.323919	-0.581603	0.564608	0.989147
MIMAT0025109	mmu-miR-6365	miRNA	-0.0780155	0.49789	-0.593814	0.556504	0.989147
MIMAT0022366	mmu-miR-5619-3p	miRNA	-0.0783486	0.440598	-0.503804	0.617595	0.989147
MIMAT0027890	mmu-miR-6994-5p	miRNA	-0.0791414	0.975133	-0.33191	0.741961	0.989147
MIMAT0003497	mmu-miR-707	miRNA	-0.0792133	0.728036	-0.627721	0.534313	0.989147
MIMAT0014918	mmu-miR-3098-3p	miRNA	-0.0792446	0.559055	-0.414135	0.681334	0.989147
MIMAT0014826	mmu-miR-3060-5p	miRNA	-0.0794986	0.611517	-0.607709	0.547353	0.989147
MIMAT0014906	mmu-miR-3092-3p	miRNA	-0.0801505	0.647534	-0.43715	0.664722	0.989147
MIMAT0029823	mmu-miR-7658-3p	miRNA	-0.0808788	0.845722	-0.279634	0.781425	0.989147
MIMAT0025163	mmu-miR-6410	miRNA	-0.0815921	0.447939	-0.679504	0.501345	0.989147
MIMAT0003455	mmu-miR-679-5p	miRNA	-0.0816003	0.600999	-0.659143	0.514172	0.989147
MIMAT0029800	mmu-miR-7649-5p	miRNA	-0.081802	0.670379	-0.588601	0.559956	0.989147
MIMAT0028088	mmu-miR-7091-5p	miRNA	-0.0820392	0.559675	-0.710314	0.482275	0.989147
MIMAT0027990	mmu-miR-7043-5p	miRNA	-0.0821959	0.609614	-0.671734	0.506219	0.989147
MIMAT0025157	mmu-miR-6405	miRNA	-0.0823316	0.267387	-0.709144	0.482992	0.989147
MIMAT0027808	mmu-miR-6954-5p	miRNA	-0.0825435	1.89349	-0.151587	0.880394	0.993357
MIMAT0004638	mmu-miR-323-5p	miRNA	-0.0828488	0.570895	-0.589605	0.559291	0.989147
MIMAT0029797	mmu-miR-7647-3p	miRNA	-0.0830365	0.3535	-0.729192	0.470797	0.989147
MIMAT0000165	mmu-miR-155-5p	miRNA	-0.0833436	0.563043	-0.484764	0.630902	0.989147
MIMAT0022376	mmu-miR-3073b-3p	miRNA	-0.0838041	0.43191	-0.722819	0.474654	0.989147
MIMAT0028134	mmu-miR-7118-3p	miRNA	-0.0838069	0.617977	-0.525423	0.602644	0.989147
MIMAT0003479	mmu-miR-669c-5p	miRNA	-0.0838223	1.05116	-0.33449	0.740031	0.989147
MIMAT0025103	mmu-miR-6360	miRNA	-0.0838489	0.399381	-0.75047	0.45805	0.989147
MIMAT0000580	mmu-miR-148b-3p	miRNA	-0.0845835	0.787727	-0.430792	0.669295	0.989147
MIMAT0028086	mmu-miR-7090-5p	miRNA	-0.0848241	0.680107	-0.597171	0.554285	0.989147
MIMAT0027833	mmu-miR-3547-3p	miRNA	-0.0851492	0.331311	-0.735765	0.466838	0.989147
MIMAT0000377	mmu-miR-299a-5p	miRNA	-0.0853303	0.692452	-0.651765	0.518864	0.989147
MIMAT0004865	mmu-miR-297c-5p	miRNA	-0.0853762	0.676814	-0.597516	0.554058	0.989147
MIMAT0000567	mmu-miR-329-3p	miRNA	-0.0855666	0.706236	-0.558738	0.579943	0.989147
MIMAT0028439	mmu-miR-7235-3p	miRNA	-0.0856451	0.637843	-0.588255	0.560186	0.989147
MIMAT0027787	mmu-miR-6943-3p	miRNA	-0.0857923	0.428117	-0.73354	0.468176	0.989147
MIMAT0027822	mmu-miR-6961-5p	miRNA	-0.0860194	0.549576	-0.650977	0.519366	0.989147
MIMAT0004850	mmu-miR-883b-5p	miRNA	-0.0861026	0.656147	-0.627726	0.534309	0.989147
MIMAT0007869	mmu-miR-1899	miRNA	-0.0861414	0.489853	-0.65522	0.516664	0.989147
MIMAT0029871	mmu-miR-7678-3p	miRNA	-0.0864628	0.57643	-0.68869	0.495616	0.989147
MIMAT0027789	mmu-miR-6944-3p	miRNA	-0.0874566	0.357002	-0.646291	0.52236	0.989147
MIMAT0016984	mmu-miR-132-5p	miRNA	-0.0875893	0.423268	-0.710867	0.481937	0.989147
MIMAT0027987	mmu-miR-7041-3p	miRNA	-0.0877322	0.665405	-0.480755	0.63372	0.989147
MIMAT0005849	mmu-miR-1191	miRNA	-0.0877823	0.544012	-0.589133	0.559603	0.989147
MIMAT0027743	mmu-miR-6921-3p	miRNA	-0.0878787	0.410238	-0.852441	0.399838	0.989147
MIMAT0027984	mmu-miR-7040-5p	miRNA	-0.0881386	1.37408	-0.211355	0.833851	0.989147
MIMAT0031418	mmu-miR-8112	miRNA	-0.0881485	0.575012	-0.514652	0.610072	0.989147
MIMAT0028035	mmu-miR-7065-3p	miRNA	-0.0882834	0.421102	-0.675722	0.503714	0.989147
MIMAT0024862	mmu-miR-6241	miRNA	-0.0889064	0.680585	-0.381415	0.70523	0.989147
MIMAT0004527	mmu-miR-124-5p	miRNA	-0.089457	0.521814	-0.55613	0.581705	0.989147
MIMAT0000368	mmu-miR-291a-3p	miRNA	-0.0897618	0.384642	-0.721335	0.475555	0.989147
MIMAT0005838	mmu-miR-669j	miRNA	-0.0899795	0.340619	-0.60081	0.551886	0.989147
MIMAT0000146	mmu-miR-134-5p	miRNA	-0.0901085	0.462905	-0.65752	0.515202	0.989147
MIMAT0003500	mmu-miR-710	miRNA	-0.0902936	0.560065	-0.622482	0.53771	0.989147
MIMAT0022987	mmu-miR-5129-3p	miRNA	-0.0907715	0.5443	-0.770948	0.445977	0.989147
MIMAT0027918	mmu-miR-7007-5p	miRNA	-0.0907783	0.492836	-0.681945	0.499819	0.989147
MIMAT0022358	mmu-miR-1231-3p	miRNA	-0.0908709	0.290034	-0.769814	0.44664	0.989147
MIMAT0014938	mmu-miR-3103-3p	miRNA	-0.0909336	0.207363	-0.764807	0.449577	0.989147
MIMAT0000559	mmu-miR-326-3p	miRNA	-0.0916978	1.27494	-0.224916	0.823369	0.989147
MIMAT0028022	mmu-miR-7059-5p	miRNA	-0.09171	0.66525	-0.48625	0.629859	0.989147
MIMAT0031395	mmu-miR-8094	miRNA	-0.0919887	0.5355	-0.526636	0.60181	0.989147
MIMAT0014866	mmu-miR-3079-5p	miRNA	-0.092108	0.212198	-0.85354	0.399237	0.989147
MIMAT0000374	mmu-miR-296-5p	miRNA	-0.092111	0.752202	-0.552406	0.584225	0.989147
MIMAT0027892	mmu-miR-6995-5p	miRNA	-0.0921611	0.578661	-0.542063	0.591253	0.989147
MIMAT0000746	mmu-miR-381-3p	miRNA	-0.0923064	0.500034	-0.897231	0.375803	0.989147
MIMAT0028430	mmu-miR-7231-5p	miRNA	-0.0927164	1.0021	-0.248202	0.805447	0.989147
MIMAT0028042	mmu-miR-7068-5p	miRNA	-0.0927215	0.444713	-0.591239	0.558208	0.989147
MIMAT0004533	mmu-miR-141-5p	miRNA	-0.0930151	0.526222	-0.657338	0.515318	0.989147
MIMAT0014899	mmu-miR-3089-5p	miRNA	-0.0930921	0.396799	-0.749454	0.458655	0.989147
MIMAT0000616	mmu-miR-101b-3p	miRNA	-0.0933031	0.513776	-0.890411	0.379402	0.989147
MIMAT0029892	mmu-miR-219c-5p	miRNA	-0.0933062	0.585404	-0.661805	0.512485	0.989147
MIMAT0017005	mmu-miR-122-3p	miRNA	-0.0933347	0.201453	-0.724051	0.473907	0.989147
MIMAT0029905	mmu-miR-1258-3p	miRNA	-0.0934949	0.69247	-0.758107	0.453525	0.989147
MIMAT0000212	mmu-miR-183-5p	miRNA	-0.094218	0.489938	-0.645593	0.522807	0.989147
MIMAT0019136	mmu-miR-1306-5p	miRNA	-0.094226	0.824486	-0.448681	0.656462	0.989147
MIMAT0004625	mmu-miR-16-1-3p	miRNA	-0.0943224	0.631474	-0.519226	0.606912	0.989147
MIMAT0009421	mmu-miR-669o-5p	miRNA	-0.0943614	0.694054	-0.561139	0.578323	0.989147
MIMAT0009422	mmu-miR-1951	miRNA	-0.0943945	0.494878	-0.730442	0.470043	0.989147
MIMAT0027751	mmu-miR-6925-3p	miRNA	-0.0945343	0.483264	-0.731708	0.469279	0.989147
MIMAT0003473	mmu-miR-133a-5p	miRNA	-0.0945377	0.463208	-0.834472	0.409746	0.989147
MIMAT0027744	mmu-miR-6922-5p	miRNA	-0.0945714	0.881006	-0.438474	0.663771	0.989147
MIMAT0028083	mmu-miR-7088-3p	miRNA	-0.0952725	0.85098	-0.604628	0.549375	0.989147
MIMAT0027776	mmu-miR-6938-5p	miRNA	-0.0953584	0.441201	-0.863071	0.394048	0.989147
MIMAT0025173	mmu-miR-6418-5p	miRNA	-0.0960445	0.575694	-0.563934	0.576441	0.989147
MIMAT0004210	mmu-miR-804	miRNA	-0.0972544	0.370174	-0.968457	0.339545	0.989147
MIMAT0003466	mmu-miR-687	miRNA	-0.0979044	0.153308	-0.955548	0.345937	0.989147
MIMAT0016989	mmu-miR-146a-3p	miRNA	-0.0982977	0.403952	-0.843905	0.404526	0.989147
MIMAT0017073	mmu-miR-194-2-3p	miRNA	-0.0983499	0.541317	-0.623193	0.537249	0.989147
MIMAT0025120	mmu-miR-6376	miRNA	-0.098536	0.538346	-0.868179	0.391285	0.989147
MIMAT0022837	mmu-miR-299b-3p	miRNA	-0.0989276	0.283763	-0.823435	0.415907	0.989147
MIMAT0028014	mmu-miR-7055-5p	miRNA	-0.0991509	0.330243	-0.818109	0.4189	0.989147
MIMAT0003478	mmu-miR-467b-3p	miRNA	-0.0994102	0.560241	-0.675088	0.504111	0.989147
MIMAT0028089	mmu-miR-7091-3p	miRNA	-0.0998506	0.618677	-0.632738	0.531069	0.989147
MIMAT0029889	mmu-miR-216c-3p	miRNA	-0.100381	0.14003	-0.755437	0.455104	0.989147
MIMAT0017059	mmu-miR-211-3p	miRNA	-0.100709	2.96247	-0.096725	0.923504	0.994083
MIMAT0022363	mmu-miR-5618-5p	miRNA	-0.100783	0.422124	-0.786938	0.436681	0.989147
MIMAT0025100	mmu-miR-6357	miRNA	-0.100785	0.476354	-0.882163	0.383783	0.989147
MIMAT0004852	mmu-miR-190b-5p	miRNA	-0.101351	0.354259	-0.839327	0.407054	0.989147
MIMAT0004576	mmu-miR-296-3p	miRNA	-0.101831	0.591558	-0.593665	0.556602	0.989147
MIMAT0027863	mmu-miR-6980-3p	miRNA	-0.102061	0.316718	-0.82019	0.417729	0.989147
MIMAT0029808	mmu-miR-7036b-5p	miRNA	-0.102859	0.165793	-0.701906	0.487438	0.989147
MIMAT0027861	mmu-miR-6979-3p	miRNA	-0.10293	0.332552	-0.762509	0.450929	0.989147
MIMAT0000369	mmu-miR-292-5p	miRNA	-0.102934	0.596218	-0.563098	0.577003	0.989147
MIMAT0014926	mmu-miR-344b-3p	miRNA	-0.103321	0.41237	-0.95785	0.344791	0.989147
MIMAT0025139	mmu-miR-6390	miRNA	-0.103649	0.602964	-0.782543	0.439224	0.989147
MIMAT0014803	mmu-miR-1264-3p	miRNA	-0.103974	0.167658	-0.994711	0.32679	0.989147
MIMAT0014884	mmu-miR-669d-2-3p	miRNA	-0.104814	0.203017	-0.924297	0.36174	0.989147
MIMAT0025089	mmu-miR-6346	miRNA	-0.105297	0.312736	-0.798702	0.429918	0.989147
MIMAT0004668	mmu-miR-138-1-3p	miRNA	-0.105551	0.713306	-0.686101	0.497227	0.989147
MIMAT0000138	mmu-miR-126a-3p	miRNA	-0.106046	0.674933	-0.47958	0.634547	0.989147
MIMAT0001419	mmu-miR-433-5p	miRNA	-0.106264	0.213446	-0.807848	0.424704	0.989147
MIMAT0025175	mmu-miR-6419	miRNA	-0.106637	0.0865067	-0.928317	0.359681	0.989147
MIMAT0007874	mmu-miR-1904	miRNA	-0.106817	0.536167	-0.808724	0.424206	0.989147
MIMAT0004849	mmu-miR-883a-3p	miRNA	-0.107151	0.55347	-0.784542	0.438066	0.989147
MIMAT0020631	mmu-miR-466q	miRNA	-0.107371	0.279998	-0.909775	0.369242	0.989147
MIMAT0014827	mmu-miR-3060-3p	miRNA	-0.10785	0.140737	-0.696057	0.491048	0.989147
MIMAT0003388	mmu-miR-376b-5p	miRNA	-0.108367	0.321723	-1.0107	0.319182	0.989147
MIMAT0003728	mmu-miR-374b-3p	miRNA	-0.109041	0.484036	-0.992661	0.327774	0.989147
MIMAT0019354	mmu-miR-28b	miRNA	-0.109383	0.307469	-0.663455	0.511441	0.989147
MIMAT0027748	mmu-miR-6924-5p	miRNA	-0.11024	0.656225	-0.564015	0.576386	0.989147
MIMAT0027855	mmu-miR-6976-3p	miRNA	-0.111292	0.690899	-0.674743	0.504328	0.989147
MIMAT0028059	mmu-miR-7076-3p	miRNA	-0.111688	0.228896	-1.20263	0.237294	0.989147
MIMAT0014852	mmu-miR-3072-5p	miRNA	-0.111955	1.05099	-0.203657	0.839816	0.989147
MIMAT0020613	mmu-miR-5106	miRNA	-0.112323	0.707107	-0.827632	0.413557	0.989147
MIMAT0027921	mmu-miR-7008-3p	miRNA	-0.11244	0.571762	-0.566506	0.574711	0.989147
MIMAT0017011	mmu-miR-30d-3p	miRNA	-0.112447	0.360448	-0.919434	0.364242	0.989147
MIMAT0000379	mmu-miR-301a-3p	miRNA	-0.112575	0.169285	-0.945524	0.350955	0.989147
MIMAT0019345	mmu-miR-1843b-5p	miRNA	-0.112633	0.404551	-0.999871	0.324322	0.989147
MIMAT0009427	mmu-miR-669n	miRNA	-0.112655	1.15557	-0.39983	0.691742	0.989147
MIMAT0004664	mmu-miR-214-5p	miRNA	-0.112784	0.563704	-0.731533	0.469385	0.989147
MIMAT0003168	mmu-miR-543-3p	miRNA	-0.114167	0.409575	-1.07795	0.28852	0.989147
MIMAT0027922	mmu-miR-7009-5p	miRNA	-0.114646	1.22341	-0.439727	0.662872	0.989147
MIMAT0014807	mmu-miR-344d-3-5p	miRNA	-0.114717	0.370185	-0.784317	0.438197	0.989147
MIMAT0014920	mmu-miR-3100-3p	miRNA	-0.115024	0.445761	-0.780755	0.440262	0.989147
MIMAT0009435	mmu-miR-1962	miRNA	-0.115095	1.1228	-0.342015	0.73441	0.989147
MIMAT0000373	mmu-miR-295-3p	miRNA	-0.115185	0.245154	-0.98387	0.332017	0.989147
MIMAT0029804	mmu-miR-7651-5p	miRNA	-0.115654	0.45213	-0.732032	0.469084	0.989147
MIMAT0007863	mmu-miR-1902	miRNA	-0.11575	0.599051	-0.445402	0.658807	0.989147
MIMAT0027739	mmu-miR-6919-3p	miRNA	-0.1161	0.549661	-0.95791	0.344762	0.989147
MIMAT0001637	mmu-miR-452-5p	miRNA	-0.116388	0.324708	-0.943643	0.351902	0.989147
MIMAT0000520	mmu-miR-208a-3p	miRNA	-0.11706	0.524765	-0.900095	0.374299	0.989147
MIMAT0025088	mmu-miR-6345	miRNA	-0.117827	0.695732	-0.851822	0.400177	0.989147
MIMAT0027778	mmu-miR-6939-5p	miRNA	-0.117865	1.35993	-0.323232	0.748467	0.989147
MIMAT0000215	mmu-miR-186-5p	miRNA	-0.117887	0.412979	-0.669538	0.507601	0.989147
MIMAT0027897	mmu-miR-6997-3p	miRNA	-0.118274	0.416531	-0.896565	0.376154	0.989147
MIMAT0028436	mmu-miR-7234-5p	miRNA	-0.118576	0.357769	-1.11374	0.273078	0.989147
MIMAT0027932	mmu-miR-7014-5p	miRNA	-0.11893	0.791305	-0.563946	0.576432	0.989147
MIMAT0029866	mmu-miR-1191b-5p	miRNA	-0.118951	0.727192	-0.729521	0.470598	0.989147
MIMAT0000155	mmu-miR-142-3p	miRNA	-0.119561	0.444418	-1.21898	0.231108	0.989147
MIMAT0000571	mmu-miR-331-3p	miRNA	-0.119707	0.828462	-0.442122	0.661155	0.989147
MIMAT0000249	mmu-miR-30e-3p	miRNA	-0.119762	0.553924	-0.907803	0.370269	0.989147
MIMAT0000366	mmu-miR-290a-5p	miRNA	-0.119797	0.546438	-0.783108	0.438897	0.989147
MIMAT0031414	mmu-miR-1668	miRNA	-0.119812	0.275157	-1.16636	0.251454	0.989147
MIMAT0003491	mmu-miR-701-5p	miRNA	-0.120106	0.77912	-0.729369	0.47069	0.989147
MIMAT0014808	mmu-miR-344d-3p	miRNA	-0.120262	0.422202	-1.00756	0.320666	0.989147
MIMAT0027805	mmu-miR-6952-3p	miRNA	-0.1203	0.551749	-0.917917	0.365024	0.989147
MIMAT0000744	mmu-miR-380-5p	miRNA	-0.120371	0.354746	-0.939063	0.354215	0.989147
MIMAT0003184	mmu-miR-487b-3p	miRNA	-0.120849	0.271963	-1.08046	0.287421	0.989147
MIMAT0004525	mmu-miR-99b-3p	miRNA	-0.120899	0.437074	-1.19644	0.239669	0.989147
MIMAT0027907	mmu-miR-7002-3p	miRNA	-0.120986	0.667165	-0.680407	0.50078	0.989147
MIMAT0000516	mmu-miR-148a-3p	miRNA	-0.121123	0.563686	-0.793756	0.432754	0.989147
MIMAT0007870	mmu-miR-1900	miRNA	-0.121159	0.702343	-0.74423	0.461768	0.989147
MIMAT0003726	mmu-miR-675-3p	miRNA	-0.121251	0.293852	-0.995966	0.326189	0.989147
MIMAT0017282	mmu-miR-544-5p	miRNA	-0.121864	0.381499	-0.735748	0.466848	0.989147
MIMAT0028450	mmu-miR-7241-5p	miRNA	-0.122248	0.871054	-0.593633	0.556623	0.989147
MIMAT0028057	mmu-miR-7075-3p	miRNA	-0.122713	0.364959	-0.850893	0.400686	0.989147
MIMAT0017006	mmu-miR-143-5p	miRNA	-0.122941	0.514364	-0.87127	0.389619	0.989147
MIMAT0019355	mmu-miR-3970	miRNA	-0.122984	0.529836	-0.857322	0.397173	0.989147
MIMAT0002107	mmu-miR-466a-3p	miRNA	-0.123215	0.62404	-0.846076	0.403331	0.989147
MIMAT0004880	mmu-miR-466e-3p	miRNA	-0.123215	0.62404	-0.846076	0.403331	0.989147
MIMAT0028391	mmu-miR-7211-3p	miRNA	-0.123455	0.468013	-1.02599	0.312023	0.989147
MIMAT0028095	mmu-miR-7094-3p	miRNA	-0.123647	0.641562	-0.832513	0.410835	0.989147
MIMAT0003727	mmu-miR-374b-5p	miRNA	-0.12418	0.227789	-1.19541	0.240064	0.989147
MIMAT0028416	mmu-miR-7224-5p	miRNA	-0.125336	0.391137	-0.773704	0.444366	0.989147
MIMAT0029906	mmu-miR-7688-5p	miRNA	-0.125522	1.00158	-0.502025	0.618833	0.989147
MIMAT0031425	mmu-miR-8119	miRNA	-0.125775	0.921495	-0.401241	0.690713	0.989147
MIMAT0028052	mmu-miR-7073-5p	miRNA	-0.126426	0.774828	-0.662052	0.512328	0.989147
MIMAT0027908	mmu-miR-6973b-5p	miRNA	-0.126556	0.728191	-0.585793	0.561821	0.989147
MIMAT0025142	mmu-miR-6392-3p	miRNA	-0.126788	0.428946	-0.591971	0.557723	0.989147
MIMAT0017030	mmu-miR-328-5p	miRNA	-0.127468	2.88911	-0.126897	0.899757	0.993463
MIMAT0015641	mmu-miR-3470b	miRNA	-0.127579	0.440445	-0.897424	0.375702	0.989147
MIMAT0003462	mmu-miR-684	miRNA	-0.12792	0.241606	-1.10227	0.277963	0.989147
MIMAT0025116	mmu-miR-6372	miRNA	-0.127957	0.38084	-0.994435	0.326923	0.989147
MIMAT0029856	mmu-miR-7674-5p	miRNA	-0.128013	0.53822	-0.58486	0.562441	0.989147
MIMAT0031402	mmu-miR-142b	miRNA	-0.128576	0.523945	-0.921779	0.363034	0.989147
MIMAT0028067	mmu-miR-7080-3p	miRNA	-0.12885	0.291885	-1.14074	0.261823	0.989147
MIMAT0004628	mmu-miR-21a-3p	miRNA	-0.129096	0.565498	-0.773107	0.444714	0.989147
MIMAT0000158	mmu-miR-146a-5p	miRNA	-0.129823	0.164103	-1.18404	0.244475	0.989147
MIMAT0009460	mmu-miR-1982-3p	miRNA	-0.130293	0.362287	-1.46243	0.152657	0.989147
MIMAT0029811	mmu-miR-7652-3p	miRNA	-0.130402	0.2031	-1.1512	0.257552	0.989147
MIMAT0028403	mmu-miR-7217-3p	miRNA	-0.130779	0.563397	-0.983446	0.332223	0.989147
MIMAT0017232	mmu-miR-301b-5p	miRNA	-0.130946	0.549296	-1.08415	0.285804	0.989147
MIMAT0028066	mmu-miR-7080-5p	miRNA	-0.131381	0.710183	-0.684468	0.498244	0.989147
MIMAT0029835	mmu-miR-7664-3p	miRNA	-0.131545	0.197417	-1.06779	0.293015	0.989147
MIMAT0000376	mmu-miR-298-5p	miRNA	-0.131548	1.02708	-0.382761	0.704241	0.989147
MIMAT0009431	mmu-miR-1958	miRNA	-0.131601	0.359377	-1.10902	0.275078	0.989147
MIMAT0000131	mmu-miR-99a-5p	miRNA	-0.131694	0.538734	-0.946174	0.350628	0.989147
MIMAT0029910	mmu-miR-7243-5p	miRNA	-0.132053	0.550246	-1.014	0.31763	0.989147
MIMAT0028045	mmu-miR-7069-3p	miRNA	-0.132208	0.558028	-0.814989	0.420659	0.989147
MIMAT0027917	mmu-miR-7006-3p	miRNA	-0.132566	0.151473	-1.15709	0.255169	0.989147
MIMAT0004547	mmu-miR-203-5p	miRNA	-0.133137	0.38141	-0.781488	0.439836	0.989147
MIMAT0028023	mmu-miR-7059-3p	miRNA	-0.133944	0.726018	-0.861975	0.394643	0.989147
MIMAT0004579	mmu-miR-302a-5p	miRNA	-0.134319	0.575348	-0.641767	0.525258	0.989147
MIMAT0014832	mmu-miR-3063-5p	miRNA	-0.13628	0.109726	-1.45142	0.15568	0.989147
MIMAT0009437	mmu-miR-1964-3p	miRNA	-0.136446	0.698126	-0.409001	0.685063	0.989147
MIMAT0000662	mmu-miR-216a-5p	miRNA	-0.137028	0.544686	-0.970283	0.338647	0.989147
MIMAT0014907	mmu-miR-3093-5p	miRNA	-0.13721	0.49653	-0.96519	0.341155	0.989147
MIMAT0004837	mmu-miR-615-5p	miRNA	-0.137327	0.551824	-0.930523	0.358555	0.989147
MIMAT0025099	mmu-miR-6356	miRNA	-0.137672	0.523479	-0.805847	0.425841	0.989147
MIMAT0017281	mmu-miR-511-3p	miRNA	-0.138463	0.601166	-0.952426	0.347495	0.989147
MIMAT0027972	mmu-miR-7034-5p	miRNA	-0.13853	0.454269	-1.07428	0.29014	0.989147
MIMAT0027993	mmu-miR-7044-3p	miRNA	-0.138578	0.43085	-0.956965	0.345231	0.989147
MIMAT0028128	mmu-miR-7115-3p	miRNA	-0.139151	0.429019	-0.905878	0.371273	0.989147
MIMAT0009391	mmu-miR-1928	miRNA	-0.139316	0.456886	-1.14293	0.260923	0.989147
MIMAT0027764	mmu-miR-6932-5p	miRNA	-0.139361	0.561564	-1.1084	0.275344	0.989147
MIMAT0028047	mmu-miR-7070-3p	miRNA	-0.139484	0.495334	-1.18927	0.242438	0.989147
MIMAT0027706	mmu-miR-6903-5p	miRNA	-0.139595	0.515146	-1.00494	0.321909	0.989147
MIMAT0001091	mmu-miR-410-3p	miRNA	-0.139882	0.320473	-0.937479	0.355018	0.989147
MIMAT0000157	mmu-miR-145a-5p	miRNA	-0.140181	0.565194	-0.610736	0.54537	0.989147
MIMAT0004856	mmu-miR-105	miRNA	-0.141065	0.54805	-1.20447	0.236593	0.989147
MIMAT0028411	mmu-miR-7221-3p	miRNA	-0.141096	5.52108	-0.0955368	0.92444	0.994083
MIMAT0000668	mmu-miR-211-5p	miRNA	-0.141218	0.495053	-1.29004	0.205603	0.989147
MIMAT0014923	mmu-miR-344e-5p	miRNA	-0.141406	0.344715	-0.709974	0.482483	0.989147
MIMAT0022383	mmu-miR-344h-5p	miRNA	-0.141406	0.344715	-0.709974	0.482483	0.989147
MIMAT0020638	mmu-miR-5127	miRNA	-0.141408	0.643624	-0.899551	0.374584	0.989147
MIMAT0003501	mmu-miR-711	miRNA	-0.141566	0.840614	-0.505892	0.616144	0.989147
MIMAT0027769	mmu-miR-6934-3p	miRNA	-0.141569	0.661656	-0.571121	0.571613	0.989147
MIMAT0025082	mmu-miR-6339	miRNA	-0.141605	0.546337	-0.87248	0.388968	0.989147
MIMAT0004620	mmu-let-7a-1-3p	miRNA	-0.141787	0.29156	-1.34556	0.187205	0.989147
MIMAT0005439	mmu-let-7c-2-3p	miRNA	-0.141787	0.29156	-1.34556	0.187205	0.989147
MIMAT0017002	mmu-miR-204-3p	miRNA	-0.142077	0.731594	-0.682845	0.499256	0.989147
MIMAT0003130	mmu-miR-486-5p	miRNA	-0.142952	10.7344	-0.189375	0.850907	0.989147
MIMAT0014943	mmu-miR-3107-5p	miRNA	-0.142952	10.7344	-0.189375	0.850907	0.989147
MIMAT0000660	mmu-miR-181a-1-3p	miRNA	-0.142984	0.278061	-1.00022	0.324158	0.989147
MIMAT0025178	mmu-miR-451b	miRNA	-0.143	0.44227	-1.07513	0.289764	0.989147
MIMAT0002109	mmu-miR-468-3p	miRNA	-0.143014	0.54073	-0.897778	0.375516	0.989147
MIMAT0028049	mmu-miR-7071-3p	miRNA	-0.143131	0.367645	-1.04633	0.302671	0.989147
MIMAT0027925	mmu-miR-7010-3p	miRNA	-0.143483	0.305111	-1.16218	0.253127	0.989147
MIMAT0028056	mmu-miR-7075-5p	miRNA	-0.143938	0.391954	-1.05579	0.298387	0.989147
MIMAT0028442	mmu-miR-7237-5p	miRNA	-0.144357	0.665585	-0.86762	0.391587	0.989147
MIMAT0027745	mmu-miR-6922-3p	miRNA	-0.145506	0.297556	-1.42149	0.164135	0.989147
MIMAT0025176	mmu-miR-6420	miRNA	-0.145579	0.535915	-0.921295	0.363283	0.989147
MIMAT0029907	mmu-miR-7688-3p	miRNA	-0.146155	0.650253	-0.801404	0.428373	0.989147
MIMAT0014936	mmu-miR-3102-3p	miRNA	-0.146702	0.519171	-1.03046	0.30995	0.989147
MIMAT0000209	mmu-miR-129-5p	miRNA	-0.147633	0.690138	-0.715249	0.479259	0.989147
MIMAT0003492	mmu-miR-702-3p	miRNA	-0.149019	0.827273	-0.678259	0.502124	0.989147
MIMAT0017180	mmu-miR-449a-3p	miRNA	-0.149194	0.123268	-1.41044	0.167346	0.989147
MIMAT0000595	mmu-miR-345-5p	miRNA	-0.149488	1.26502	-0.4916	0.62611	0.989147
MIMAT0014902	mmu-miR-3090-3p	miRNA	-0.149869	0.476415	-1.21153	0.233912	0.989147
MIMAT0028425	mmu-miR-7228-3p	miRNA	-0.15091	0.367633	-0.95583	0.345796	0.989147
MIMAT0027772	mmu-miR-6936-5p	miRNA	-0.151744	0.418129	-1.23207	0.226238	0.989147
MIMAT0000706	mmu-miR-362-5p	miRNA	-0.151793	0.39356	-1.1194	0.27069	0.989147
MIMAT0017027	mmu-miR-326-5p	miRNA	-0.151856	0.94961	-0.393249	0.696551	0.989147
MIMAT0025132	mmu-miR-130c	miRNA	-0.151867	0.232798	-1.33322	0.191183	0.989147
MIMAT0017195	mmu-miR-471-3p	miRNA	-0.152216	0.462361	-1.08893	0.283719	0.989147
MIMAT0009433	mmu-miR-1960	miRNA	-0.152794	0.374789	-1.16975	0.250105	0.989147
MIMAT0004237	mmu-miR-742-3p	miRNA	-0.152871	0.680528	-1.0525	0.299874	0.989147
MIMAT0004938	mmu-miR-875-3p	miRNA	-0.153102	0.636069	-0.85034	0.400988	0.989147
MIMAT0017057	mmu-miR-320-5p	miRNA	-0.153264	0.323847	-1.29165	0.205048	0.989147
MIMAT0028079	mmu-miR-7086-3p	miRNA	-0.153466	0.291047	-1.4152	0.165958	0.989147
MIMAT0027999	mmu-miR-7047-3p	miRNA	-0.153997	0.663863	-0.919848	0.364028	0.989147
MIMAT0004537	mmu-miR-154-3p	miRNA	-0.154166	0.208525	-1.38562	0.17474	0.989147
MIMAT0025084	mmu-miR-6341	miRNA	-0.154199	0.285999	-1.33101	0.1919	0.989147
MIMAT0012773	mmu-miR-767	miRNA	-0.155433	0.495499	-1.37404	0.178276	0.989147
MIMAT0025134	mmu-miR-6387	miRNA	-0.155688	0.370947	-1.06602	0.293806	0.989147
MIMAT0004524	mmu-miR-30b-3p	miRNA	-0.155765	0.635436	-1.08212	0.286691	0.989147
MIMAT0028073	mmu-miR-7083-3p	miRNA	-0.156743	0.260632	-1.27812	0.209723	0.989147
MIMAT0028447	mmu-miR-7239-3p	miRNA	-0.157004	0.462997	-1.0561	0.298249	0.989147
MIMAT0022841	mmu-miR-219a-2-3p	miRNA	-0.157243	0.411696	-1.07062	0.291761	0.989147
MIMAT0028132	mmu-miR-7117-3p	miRNA	-0.157284	0.837663	-0.811249	0.422775	0.989147
MIMAT0003495	mmu-miR-705	miRNA	-0.157519	2.64075	-0.1423	0.887669	0.993357
MIMAT0000162	mmu-miR-152-3p	miRNA	-0.158441	0.174946	-1.28748	0.206481	0.989147
MIMAT0003166	mmu-miR-546	miRNA	-0.158765	1.58793	-0.311435	0.75734	0.989147
MIMAT0014908	mmu-miR-3093-3p	miRNA	-0.158867	0.72566	-0.634916	0.529664	0.989147
MIMAT0029806	mmu-miR-219b-5p	miRNA	-0.158976	0.421674	-1.38815	0.173976	0.989147
MIMAT0027916	mmu-miR-7006-5p	miRNA	-0.159191	0.514458	-1.13362	0.264757	0.989147
MIMAT0017004	mmu-miR-206-5p	miRNA	-0.159509	0.448932	-1.39247	0.172675	0.989147
MIMAT0009394	mmu-miR-1931	miRNA	-0.159568	4.8444	-0.135915	0.892677	0.993463
MIMAT0022378	mmu-miR-5624-3p	miRNA	-0.159931	0.6856	-1.1501	0.257998	0.989147
MIMAT0028398	mmu-miR-7215-5p	miRNA	-0.159958	0.408905	-1.16664	0.251342	0.989147
MIMAT0017330	mmu-miR-669e-3p	miRNA	-0.160169	0.495568	-1.08868	0.283829	0.989147
MIMAT0029827	mmu-miR-7660-3p	miRNA	-0.160498	0.530416	-1.18226	0.245173	0.989147
MIMAT0028432	mmu-miR-7232-5p	miRNA	-0.160612	0.678325	-0.963749	0.341867	0.989147
MIMAT0027978	mmu-miR-7037-5p	miRNA	-0.160841	0.732856	-0.985506	0.331225	0.989147
MIMAT0029846	mmu-miR-7670-5p	miRNA	-0.161316	0.553231	-0.962419	0.342525	0.989147
MIMAT0014824	mmu-miR-1251-5p	miRNA	-0.161354	0.490248	-1.29384	0.204299	0.989147
MIMAT0029817	mmu-miR-7655-3p	miRNA	-0.163974	0.674649	-1.08569	0.285132	0.989147
MIMAT0027709	mmu-miR-6904-3p	miRNA	-0.163994	0.768188	-0.905051	0.371704	0.989147
MIMAT0020633	mmu-miR-5123	miRNA	-0.164233	0.206569	-1.71468	0.095359	0.978695
MIMAT0027945	mmu-miR-7020-3p	miRNA	-0.164538	0.601592	-1.357	0.183577	0.989147
MIMAT0004781	mmu-miR-532-3p	miRNA	-0.165617	1.80434	-0.274241	0.785532	0.989147
MIMAT0017239	mmu-miR-667-5p	miRNA	-0.166148	1.45419	-0.334059	0.740354	0.989147
MIMAT0029887	mmu-miR-7683-3p	miRNA	-0.166669	0.451249	-0.924819	0.361472	0.989147
MIMAT0007865	mmu-miR-1897-3p	miRNA	-0.166801	0.419578	-1.19787	0.239118	0.989147
MIMAT0029863	mmu-miR-129b-3p	miRNA	-0.167859	1.08251	-0.64596	0.522572	0.989147
MIMAT0028136	mmu-miR-7119-3p	miRNA	-0.168451	1.24796	-0.270134	0.788664	0.989147
MIMAT0027868	mmu-miR-6983-5p	miRNA	-0.168481	0.914982	-0.323174	0.748511	0.989147
MIMAT0027836	mmu-miR-6967-5p	miRNA	-0.168592	0.557974	-0.88118	0.384307	0.989147
MIMAT0027750	mmu-miR-6925-5p	miRNA	-0.16868	0.652234	-0.866837	0.392009	0.989147
MIMAT0027966	mmu-miR-7031-5p	miRNA	-0.168692	0.575814	-1.04258	0.304381	0.989147
MIMAT0000742	mmu-miR-378a-5p	miRNA	-0.168783	1.0398	-0.406019	0.687232	0.989147
MIMAT0027758	mmu-miR-6929-5p	miRNA	-0.16948	0.704217	-0.845447	0.403676	0.989147
MIMAT0014878	mmu-miR-3085-5p	miRNA	-0.169571	0.890833	-0.895511	0.376709	0.989147
MIMAT0025153	mmu-miR-6401	miRNA	-0.170513	0.469646	-1.35133	0.185369	0.989147
MIMAT0003452	mmu-miR-678	miRNA	-0.170815	0.589123	-0.977015	0.335351	0.989147
MIMAT0000137	mmu-miR-126a-5p	miRNA	-0.170979	0.614277	-0.991621	0.328274	0.989147
MIMAT0000648	mmu-miR-10a-5p	miRNA	-0.171107	0.395505	-1.2296	0.227152	0.989147
MIMAT0017022	mmu-miR-34a-3p	miRNA	-0.171192	0.559812	-1.37838	0.176945	0.989147
MIMAT0028050	mmu-miR-7072-5p	miRNA	-0.171565	0.716607	-0.747017	0.460106	0.989147
MIMAT0022364	mmu-miR-5618-3p	miRNA	-0.171741	0.357118	-1.10447	0.277021	0.989147
MIMAT0000672	mmu-miR-199b-5p	miRNA	-0.171778	0.407535	-1.59546	0.119713	0.989147
MIMAT0027845	mmu-miR-6971-3p	miRNA	-0.171988	0.565528	-1.35163	0.185274	0.989147
MIMAT0028422	mmu-miR-7227-5p	miRNA	-0.172292	0.168016	-1.52796	0.135623	0.989147
MIMAT0004531	mmu-miR-135a-1-3p	miRNA	-0.173042	0.557118	-0.962638	0.342416	0.989147
MIMAT0001546	mmu-miR-450a-5p	miRNA	-0.174185	0.535923	-1.12542	0.268167	0.989147
MIMAT0014837	mmu-miR-3065-3p	miRNA	-0.17468	0.194973	-1.8381	0.0746557	0.978695
MIMAT0027869	mmu-miR-6983-3p	miRNA	-0.174829	0.325973	-1.30086	0.201914	0.989147
MIMAT0017264	mmu-miR-181d-3p	miRNA	-0.175324	0.839919	-0.842392	0.405361	0.989147
MIMAT0017194	mmu-miR-452-3p	miRNA	-0.17589	0.30321	-1.4336	0.160672	0.989147
MIMAT0003731	mmu-miR-671-5p	miRNA	-0.176163	1.10396	-0.411907	0.682951	0.989147
MIMAT0027767	mmu-miR-6933-3p	miRNA	-0.176471	0.504283	-1.08233	0.286598	0.989147
MIMAT0027814	mmu-miR-6957-5p	miRNA	-0.176512	0.375636	-1.28504	0.207324	0.989147
MIMAT0022365	mmu-miR-5619-5p	miRNA	-0.177322	0.606208	-1.02991	0.310205	0.989147
MIMAT0003891	mmu-miR-770-3p	miRNA	-0.178309	0.831661	-1.03594	0.307424	0.989147
MIMAT0015642	mmu-miR-3471	miRNA	-0.178395	0.462639	-0.965473	0.341015	0.989147
MIMAT0025105	mmu-miR-145b	miRNA	-0.179171	0.423017	-1.51218	0.139578	0.989147
MIMAT0004877	mmu-miR-466c-5p	miRNA	-0.179757	0.783802	-0.941587	0.352939	0.989147
MIMAT0004858	mmu-miR-18b-5p	miRNA	-0.18008	0.170575	-1.65305	0.107377	0.989147
MIMAT0016979	mmu-miR-1a-1-5p	miRNA	-0.182033	0.632387	-1.26316	0.214987	0.989147
MIMAT0031403	mmu-miR-8100	miRNA	-0.182452	0.92548	-0.786176	0.437122	0.989147
MIMAT0017340	mmu-miR-1930-3p	miRNA	-0.182562	0.538521	-1.40436	0.169134	0.989147
MIMAT0004760	mmu-miR-470-3p	miRNA	-0.182919	0.7044	-0.939122	0.354185	0.989147
MIMAT0017080	mmu-miR-379-3p	miRNA	-0.182979	0.565542	-1.49683	0.143516	0.989147
MIMAT0028417	mmu-miR-7224-3p	miRNA	-0.183157	0.750434	-1.18463	0.244245	0.989147
MIMAT0019347	mmu-miR-3965	miRNA	-0.183679	0.85005	-0.972737	0.337443	0.989147
MIMAT0031419	mmu-miR-8113	miRNA	-0.183721	1.80545	-0.302501	0.764084	0.989147
MIMAT0027991	mmu-miR-7043-3p	miRNA	-0.18428	0.529009	-1.32097	0.195191	0.989147
MIMAT0017331	mmu-miR-1197-5p	miRNA	-0.184336	0.365238	-1.52715	0.135825	0.989147
MIMAT0004630	mmu-miR-26b-3p	miRNA	-0.185242	0.69046	-1.29937	0.20242	0.989147
MIMAT0003742	mmu-miR-455-3p	miRNA	-0.185404	1.25589	-0.277259	0.783233	0.989147
MIMAT0017275	mmu-miR-467c-3p	miRNA	-0.186024	0.528651	-1.05456	0.298941	0.989147
MIMAT0004627	mmu-miR-20a-3p	miRNA	-0.186148	0.627519	-1.49487	0.144025	0.989147
MIMAT0014953	mmu-miR-374c-5p	miRNA	-0.186767	0.447598	-1.68776	0.100463	0.989147
MIMAT0019350	mmu-miR-3966	miRNA	-0.186996	0.302154	-1.51351	0.139242	0.989147
MIMAT0003409	mmu-miR-467a-5p	miRNA	-0.187362	0.346137	-1.3568	0.183642	0.989147
MIMAT0019352	mmu-miR-3968	miRNA	-0.18737	0.781884	-1.0774	0.288765	0.989147
MIMAT0027866	mmu-miR-6982-5p	miRNA	-0.187461	0.932071	-0.655065	0.516763	0.989147
MIMAT0029810	mmu-miR-7652-5p	miRNA	-0.187688	0.227915	-1.85486	0.0721629	0.976502
MIMAT0017342	mmu-miR-1943-3p	miRNA	-0.189619	0.209006	-1.52743	0.135755	0.989147
MIMAT0019351	mmu-miR-3967	miRNA	-0.189718	0.881878	-1.04858	0.30165	0.989147
MIMAT0027800	mmu-miR-6950-5p	miRNA	-0.190437	0.257011	-1.56828	0.125927	0.989147
MIMAT0014809	mmu-miR-1298-5p	miRNA	-0.191127	0.410539	-1.53897	0.132917	0.989147
MIMAT0003464	mmu-miR-686	miRNA	-0.191707	0.904543	-1.00884	0.320062	0.989147
MIMAT0029854	mmu-miR-3569-5p	miRNA	-0.192225	0.379337	-1.27762	0.209898	0.989147
MIMAT0000140	mmu-miR-128-3p	miRNA	-0.192575	0.692788	-0.787757	0.436209	0.989147
MIMAT0028438	mmu-miR-7235-5p	miRNA	-0.192601	2.76707	-0.142442	0.887558	0.993357
MIMAT0017267	mmu-miR-190b-3p	miRNA	-0.193307	0.523845	-1.37335	0.178488	0.989147
MIMAT0027746	mmu-miR-6923-5p	miRNA	-0.193704	0.729404	-0.728187	0.471404	0.989147
MIMAT0016994	mmu-miR-129-1-3p	miRNA	-0.193832	0.509034	-1.28624	0.206908	0.989147
MIMAT0017257	mmu-miR-701-3p	miRNA	-0.19505	0.472791	-1.4961	0.143704	0.989147
MIMAT0028394	mmu-miR-7213-5p	miRNA	-0.19802	0.205109	-2.04522	0.0485061	0.944365
MIMAT0005858	mmu-miR-1197-3p	miRNA	-0.198033	0.575392	-1.54714	0.130939	0.989147
MIMAT0017037	mmu-miR-341-5p	miRNA	-0.198124	0.658255	-1.34714	0.186701	0.989147
MIMAT0028046	mmu-miR-7070-5p	miRNA	-0.198905	1.00249	-0.534851	0.596178	0.989147
MIMAT0004643	mmu-miR-331-5p	miRNA	-0.198992	0.954004	-0.822613	0.416368	0.989147
MIMAT0020611	mmu-miR-5104	miRNA	-0.199397	0.593147	-1.12786	0.267148	0.989147
MIMAT0031397	mmu-miR-1291	miRNA	-0.199709	0.919016	-0.575244	0.568853	0.989147
MIMAT0017076	mmu-miR-363-5p	miRNA	-0.200945	0.86974	-1.37087	0.179251	0.989147
MIMAT0028419	mmu-miR-7225-3p	miRNA	-0.201815	0.172075	-1.47696	0.14874	0.989147
MIMAT0004846	mmu-miR-881-3p	miRNA	-0.202257	0.387395	-1.27936	0.209294	0.989147
MIMAT0000556	mmu-miR-324-3p	miRNA	-0.202612	1.23934	-0.422053	0.6756	0.989147
MIMAT0017277	mmu-miR-504-3p	miRNA	-0.202721	0.744431	-0.715156	0.479316	0.989147
MIMAT0007875	mmu-miR-1898	miRNA	-0.20284	0.924215	-0.667648	0.508792	0.989147
MIMAT0014865	mmu-miR-3078-3p	miRNA	-0.203154	0.324512	-2.0786	0.0451451	0.944365
MIMAT0027825	mmu-miR-6962-3p	miRNA	-0.203551	0.420112	-1.58692	0.121638	0.989147
MIMAT0004789	mmu-miR-450a-2-3p	miRNA	-0.204108	0.704772	-1.42629	0.162756	0.989147
MIMAT0029902	mmu-miR-7687-5p	miRNA	-0.204235	1.58043	-0.429224	0.670424	0.989147
MIMAT0014904	mmu-miR-3091-3p	miRNA	-0.20588	0.362005	-1.41232	0.166798	0.989147
MIMAT0000517	mmu-miR-192-5p	miRNA	-0.20652	0.799626	-1.2173	0.231737	0.989147
MIMAT0027795	mmu-miR-6947-3p	miRNA	-0.206564	0.278349	-1.976	0.0561801	0.944365
MIMAT0017170	mmu-miR-196b-3p	miRNA	-0.208391	0.675434	-1.00776	0.320575	0.989147
MIMAT0014858	mmu-miR-3075-5p	miRNA	-0.209779	0.578717	-1.38558	0.174752	0.989147
MIMAT0004669	mmu-miR-125b-1-3p	miRNA	-0.210117	0.49338	-1.48585	0.146384	0.989147
MIMAT0017084	mmu-miR-181b-2-3p	miRNA	-0.211281	0.703407	-1.15979	0.254085	0.989147
MIMAT0029875	mmu-miR-7680-3p	miRNA	-0.211486	0.322058	-1.76873	0.0857637	0.978695
MIMAT0027842	mmu-miR-6970-5p	miRNA	-0.211506	5.20926	-0.148706	0.88265	0.993357
MIMAT0009398	mmu-miR-1934-5p	miRNA	-0.212032	0.608856	-1.27863	0.209548	0.989147
MIMAT0004660	mmu-miR-19a-5p	miRNA	-0.213118	0.315725	-1.47712	0.148699	0.989147
MIMAT0012772	mmu-miR-599	miRNA	-0.213182	0.422586	-1.64764	0.10849	0.989147
MIMAT0007877	mmu-miR-1894-5p	miRNA	-0.213473	0.197875	-1.42434	0.163315	0.989147
MIMAT0004651	mmu-miR-340-5p	miRNA	-0.213524	0.599944	-1.51778	0.138165	0.989147
MIMAT0028446	mmu-miR-7239-5p	miRNA	-0.213883	0.274277	-1.8765	0.0690504	0.960317
MIMAT0028074	mmu-miR-7084-5p	miRNA	-0.214009	0.216714	-1.88221	0.0682488	0.957491
MIMAT0027742	mmu-miR-6921-5p	miRNA	-0.214028	0.996758	-0.872818	0.388786	0.989147
MIMAT0007867	mmu-miR-1895	miRNA	-0.214318	1.00026	-0.777101	0.442386	0.989147
MIMAT0028441	mmu-miR-7236-3p	miRNA	-0.215582	0.67985	-1.4644	0.152122	0.989147
MIMAT0029812	mmu-miR-7653-5p	miRNA	-0.21581	2.18126	-0.401298	0.690671	0.989147
MIMAT0027950	mmu-miR-7023-5p	miRNA	-0.216204	1.0023	-0.497973	0.621657	0.989147
MIMAT0000238	mmu-miR-205-5p	miRNA	-0.217036	0.656782	-1.44716	0.156863	0.989147
MIMAT0025169	mmu-miR-6415	miRNA	-0.217767	1.0725	-1.06825	0.292814	0.989147
MIMAT0014929	mmu-miR-344g-5p	miRNA	-0.218031	0.695737	-0.75845	0.453323	0.989147
MIMAT0014924	mmu-miR-344e-3p	miRNA	-0.218608	0.514881	-1.73252	0.092098	0.978695
MIMAT0027774	mmu-miR-6937-5p	miRNA	-0.219146	6.6014	-0.174697	0.862337	0.990113
MIMAT0025129	mmu-miR-6383	miRNA	-0.21998	0.588678	-1.43995	0.158878	0.989147
MIMAT0029850	mmu-miR-7672-5p	miRNA	-0.220243	0.875664	-1.01827	0.315624	0.989147
MIMAT0004635	mmu-miR-92a-2-5p	miRNA	-0.22094	0.984004	-0.56065	0.578653	0.989147
MIMAT0020642	mmu-miR-5131	miRNA	-0.223127	0.511591	-2.06521	0.0464672	0.944365
MIMAT0027796	mmu-miR-6948-5p	miRNA	-0.223386	0.33151	-1.76453	0.0864788	0.978695
MIMAT0027894	mmu-miR-6996-5p	miRNA	-0.224352	0.3122	-2.06099	0.0468919	0.944365
MIMAT0024857	mmu-miR-6236	miRNA	-0.224862	0.605984	-1.15538	0.255859	0.989147
MIMAT0027983	mmu-miR-7039-3p	miRNA	-0.225085	0.207202	-1.78092	0.0837163	0.978695
MIMAT0031401	mmu-miR-8099	miRNA	-0.22554	0.90687	-0.981396	0.333218	0.989147
MIMAT0022356	mmu-miR-5615-3p	miRNA	-0.22745	0.316949	-1.11229	0.273691	0.989147
MIMAT0000136	mmu-miR-125b-5p	miRNA	-0.229162	0.840884	-0.984946	0.331496	0.989147
MIMAT0004661	mmu-miR-28a-3p	miRNA	-0.229576	0.288914	-2.14115	0.0393951	0.931064
MIMAT0004217	mmu-miR-465a-3p	miRNA	-0.23069	0.444569	-1.58799	0.121396	0.989147
MIMAT0004872	mmu-miR-465b-3p	miRNA	-0.23069	0.444569	-1.58799	0.121396	0.989147
MIMAT0004874	mmu-miR-465c-3p	miRNA	-0.23069	0.444569	-1.58799	0.121396	0.989147
MIMAT0017017	mmu-let-7f-2-3p	miRNA	-0.231057	0.576201	-1.76228	0.0868649	0.978695
MIMAT0009425	mmu-miR-1954	miRNA	-0.232847	0.354945	-1.64172	0.109717	0.989147
MIMAT0027910	mmu-miR-7003-5p	miRNA	-0.233648	1.66478	-0.463653	0.645803	0.989147
MIMAT0014941	mmu-miR-3105-5p	miRNA	-0.234951	0.45887	-1.72038	0.0943072	0.978695
MIMAT0005837	mmu-miR-1187	miRNA	-0.234972	1.0075	-0.730273	0.470145	0.989147
MIMAT0029793	mmu-miR-6546-3p	miRNA	-0.235052	0.476902	-1.43289	0.160872	0.989147
MIMAT0027883	mmu-miR-6990-3p	miRNA	-0.236259	0.621209	-1.78139	0.0836386	0.978695
MIMAT0017236	mmu-miR-551b-5p	miRNA	-0.237529	0.538369	-1.57935	0.123366	0.989147
MIMAT0001093	mmu-miR-411-3p	miRNA	-0.238745	0.451564	-1.92737	0.0621851	0.944365
MIMAT0027871	mmu-miR-6984-3p	miRNA	-0.239243	0.611951	-1.82675	0.0763845	0.978695
MIMAT0005293	mmu-miR-467e-5p	miRNA	-0.239658	0.714887	-1.53026	0.135054	0.989147
MIMAT0025110	mmu-miR-6366	miRNA	-0.241363	3.84953	-0.193031	0.848065	0.989147
MIMAT0014843	mmu-miR-3068-3p	miRNA	-0.241745	0.618008	-1.2953	0.203801	0.989147
MIMAT0014828	mmu-miR-3061-5p	miRNA	-0.243551	0.82958	-1.20506	0.236367	0.989147
MIMAT0027792	mmu-miR-6946-5p	miRNA	-0.243898	0.834437	-1.23218	0.226198	0.989147
MIMAT0029815	mmu-miR-7654-3p	miRNA	-0.244067	0.675574	-1.30083	0.201923	0.989147
MIMAT0005840	mmu-miR-669i	miRNA	-0.245633	0.754418	-1.15974	0.254104	0.989147
MIMAT0003737	mmu-miR-666-5p	miRNA	-0.247671	0.274956	-2.67841	0.0112432	0.669787
MIMAT0000129	mmu-miR-30a-3p	miRNA	-0.252704	0.68601	-1.7807	0.0837532	0.978695
MIMAT0014834	mmu-miR-3064-5p	miRNA	-0.253099	0.53902	-1.23858	0.223847	0.989147
MIMAT0029868	mmu-miR-7677-5p	miRNA	-0.253112	0.864683	-1.02869	0.310773	0.989147
MIMAT0027942	mmu-miR-7019-5p	miRNA	-0.253778	0.796804	-0.954819	0.3463	0.989147
MIMAT0027799	mmu-miR-6949-3p	miRNA	-0.254817	0.91929	-1.56343	0.127063	0.989147
MIMAT0022379	mmu-miR-5625-5p	miRNA	-0.2559	0.673186	-1.54426	0.131633	0.989147
MIMAT0003740	mmu-miR-674-5p	miRNA	-0.257457	4.19306	-0.155211	0.877558	0.992519
MIMAT0015640	mmu-miR-3470a	miRNA	-0.257555	0.818293	-1.56228	0.127333	0.989147
MIMAT0017253	mmu-miR-669c-3p	miRNA	-0.258458	0.351342	-1.83912	0.0745015	0.978695
MIMAT0029862	mmu-miR-129b-5p	miRNA	-0.260112	0.336718	-2.14196	0.0393249	0.931064
MIMAT0017038	mmu-miR-344-5p	miRNA	-0.260403	0.602025	-1.58886	0.1212	0.989147
MIMAT0000126	mmu-miR-27b-3p	miRNA	-0.262383	0.588676	-1.04864	0.301621	0.989147
MIMAT0027725	mmu-miR-6912-3p	miRNA	-0.262504	0.392834	-1.75433	0.0882383	0.978695
MIMAT0028025	mmu-miR-7060-3p	miRNA	-0.263617	0.0571746	-2.47069	0.0185684	0.734323
MIMAT0027834	mmu-miR-6966-5p	miRNA	-0.263744	0.269208	-1.2051	0.23635	0.989147
MIMAT0028072	mmu-miR-7083-5p	miRNA	-0.265077	1.08603	-0.806372	0.425542	0.989147
MIMAT0005844	mmu-miR-466f	miRNA	-0.266377	0.628781	-1.15447	0.256229	0.989147
MIMAT0003457	mmu-miR-680	miRNA	-0.269453	0.62087	-1.72297	0.0938323	0.978695
MIMAT0014841	mmu-miR-3067-3p	miRNA	-0.270073	0.73873	-0.821318	0.417095	0.989147
MIMAT0001095	mmu-miR-370-3p	miRNA	-0.271167	0.334826	-1.90187	0.0655494	0.946763
MIMAT0003725	mmu-miR-675-5p	miRNA	-0.271498	0.420963	-1.93406	0.0613273	0.944365
MIMAT0017072	mmu-miR-217-3p	miRNA	-0.271582	0.830184	-1.81259	0.0785893	0.978695
MIMAT0004324	mmu-miR-181d-5p	miRNA	-0.272972	0.782939	-0.81155	0.422604	0.989147
MIMAT0027976	mmu-miR-7036-5p	miRNA	-0.273722	1.8718	-0.395819	0.694671	0.989147
MIMAT0031427	mmu-miR-3473g	miRNA	-0.274495	1.23533	-0.782689	0.43914	0.989147
MIMAT0028413	mmu-miR-7222-3p	miRNA	-0.275052	0.773449	-1.07819	0.288415	0.989147
MIMAT0017051	mmu-miR-100-3p	miRNA	-0.275388	0.283831	-2.71114	0.0103698	0.65952
MIMAT0003171	mmu-miR-542-5p	miRNA	-0.276678	0.775332	-0.972433	0.337592	0.989147
MIMAT0022385	mmu-miR-5627-5p	miRNA	-0.278009	0.676778	-1.38643	0.174494	0.989147
MIMAT0014961	mmu-miR-344d-2-5p	miRNA	-0.278373	0.780468	-1.71269	0.0957291	0.978695
MIMAT0027882	mmu-miR-6990-5p	miRNA	-0.278446	0.282412	-1.81145	0.0787686	0.978695
MIMAT0028127	mmu-miR-7115-5p	miRNA	-0.278595	0.578548	-1.16127	0.253489	0.989147
MIMAT0028076	mmu-miR-7085-5p	miRNA	-0.28035	1.45251	-0.341266	0.73497	0.989147
MIMAT0000145	mmu-miR-133a-3p	miRNA	-0.280459	0.350602	-1.97421	0.0563928	0.944365
MIMAT0028032	mmu-miR-7064-5p	miRNA	-0.282614	0.714202	-1.20687	0.23568	0.989147
MIMAT0029891	mmu-miR-7684-3p	miRNA	-0.283007	1.12524	-0.790776	0.434468	0.989147
MIMAT0026642	mmu-miR-3475-5p	miRNA	-0.283698	0.786128	-1.58344	0.12243	0.989147
MIMAT0002106	mmu-miR-465a-5p	miRNA	-0.287128	0.535543	-2.01935	0.0512592	0.944365
MIMAT0027714	mmu-miR-6907-5p	miRNA	-0.287413	0.597741	-2.08017	0.0449914	0.944365
MIMAT0014915	mmu-miR-3097-5p	miRNA	-0.287962	0.815625	-1.73745	0.0912134	0.978695
MIMAT0015646	mmu-miR-3474	miRNA	-0.288521	0.655237	-1.2999	0.202238	0.989147
MIMAT0005291	mmu-miR-582-5p	miRNA	-0.289249	0.652989	-1.91759	0.0634576	0.946763
MIMAT0029841	mmu-miR-7667-3p	miRNA	-0.289939	0.162703	-2.62585	0.0127892	0.697192
MIMAT0027804	mmu-miR-6952-5p	miRNA	-0.291726	1.04135	-0.881725	0.384016	0.989147
MIMAT0009416	mmu-miR-1949	miRNA	-0.293836	0.600257	-1.48566	0.146433	0.989147
MIMAT0022372	mmu-miR-5622-3p	miRNA	-0.299164	1.37721	-0.855043	0.398416	0.989147
MIMAT0027915	mmu-miR-7005-3p	miRNA	-0.300945	0.272601	-2.41937	0.0209524	0.734323
MIMAT0000586	mmu-miR-340-3p	miRNA	-0.301112	0.640537	-2.42854	0.0205069	0.734323
MIMAT0014882	mmu-miR-466m-5p	miRNA	-0.301208	1.33147	-1.10499	0.276797	0.989147
MIMAT0017346	mmu-miR-669m-5p	miRNA	-0.301208	1.33147	-1.10499	0.276797	0.989147
MIMAT0029831	mmu-miR-7662-3p	miRNA	-0.303176	1.67765	-0.489165	0.627815	0.989147
MIMAT0025114	mmu-miR-6370	miRNA	-0.30325	0.373451	-3.0308	0.00459805	0.584872
MIMAT0003475	mmu-miR-146b-5p	miRNA	-0.305123	0.861011	-1.65049	0.107903	0.989147
MIMAT0004546	mmu-miR-202-5p	miRNA	-0.305413	0.946983	-1.00383	0.322435	0.989147
MIMAT0017077	mmu-miR-365-1-5p	miRNA	-0.307037	1.12512	-1.06676	0.293474	0.989147
MIMAT0017269	mmu-miR-147-5p	miRNA	-0.308695	0.592919	-1.95154	0.0591351	0.944365
MIMAT0028409	mmu-miR-7220-3p	miRNA	-0.310903	0.822417	-1.66616	0.104721	0.989147
MIMAT0025092	mmu-miR-6349	miRNA	-0.31223	0.769564	-0.844446	0.404228	0.989147
MIMAT0022355	mmu-miR-5615-5p	miRNA	-0.315223	0.308565	-2.72992	0.00989777	0.65952
MIMAT0025106	mmu-miR-6362	miRNA	-0.317261	0.603763	-2.13963	0.0395263	0.931064
MIMAT0015645	mmu-miR-3473a	miRNA	-0.31875	1.60915	-0.795298	0.431868	0.989147
MIMAT0029873	mmu-miR-7679-3p	miRNA	-0.321772	0.904819	-1.19843	0.238904	0.989147
MIMAT0017014	mmu-miR-208a-5p	miRNA	-0.321853	0.489956	-2.66626	0.0115844	0.669787
MIMAT0014952	mmu-miR-3110-3p	miRNA	-0.322411	0.515427	-1.77354	0.0849516	0.978695
MIMAT0027790	mmu-miR-6945-5p	miRNA	-0.331152	0.631374	-1.99657	0.053796	0.944365
MIMAT0028392	mmu-miR-7212-5p	miRNA	-0.333131	0.643963	-1.90401	0.0652606	0.946763
MIMAT0003782	mmu-miR-676-3p	miRNA	-0.33324	2.115	-0.371509	0.712526	0.989147
MIMAT0003188	mmu-miR-503-5p	miRNA	-0.334236	1.20823	-0.753376	0.456326	0.989147
MIMAT0009430	mmu-miR-1957a	miRNA	-0.334444	0.811304	-1.25971	0.216214	0.989147
MIMAT0027782	mmu-miR-6941-5p	miRNA	-0.336124	1.12145	-0.940439	0.353519	0.989147
MIMAT0027872	mmu-miR-6985-5p	miRNA	-0.339087	0.747281	-1.66632	0.104689	0.989147
MIMAT0020630	mmu-miR-5122	miRNA	-0.339404	0.794996	-0.714536	0.479694	0.989147
MIMAT0027786	mmu-miR-6943-5p	miRNA	-0.341463	0.646853	-1.98877	0.05469	0.944365
MIMAT0009408	mmu-miR-1943-5p	miRNA	-0.343397	0.579568	-2.1233	0.040966	0.941725
MIMAT0009428	mmu-miR-1956	miRNA	-0.344195	0.922726	-1.09557	0.280844	0.989147
MIMAT0000159	mmu-miR-149-5p	miRNA	-0.346527	0.665157	-1.5911	0.120694	0.989147
MIMAT0005440	mmu-miR-24-2-5p	miRNA	-0.3494	0.69564	-2.32137	0.0262914	0.799215
MIMAT0027798	mmu-miR-6949-5p	miRNA	-0.350216	4.14937	-0.287695	0.775299	0.989147
MIMAT0024858	mmu-miR-6237	miRNA	-0.353767	0.600937	-2.79953	0.00831651	0.65952
MIMAT0014857	mmu-miR-3074-1-3p	miRNA	-0.355153	0.635335	-1.02063	0.314519	0.989147
MIMAT0004665	mmu-miR-218-1-3p	miRNA	-0.359239	0.218421	-2.50404	0.0171549	0.727368
MIMAT0004869	mmu-miR-421-3p	miRNA	-0.361104	1.69323	-0.584932	0.562393	0.989147
MIMAT0027995	mmu-miR-7045-3p	miRNA	-0.363684	1.98856	-0.469977	0.641323	0.989147
MIMAT0000650	mmu-miR-17-3p	miRNA	-0.364225	3.38408	-0.275808	0.784338	0.989147
MIMAT0020620	mmu-miR-5112	miRNA	-0.36428	3.29654	-0.328246	0.744706	0.989147
MIMAT0020621	mmu-miR-5113	miRNA	-0.366749	0.849594	-1.72848	0.0928281	0.978695
MIMAT0027858	mmu-miR-6978-5p	miRNA	-0.371526	0.771669	-0.983359	0.332265	0.989147
MIMAT0017278	mmu-miR-92b-5p	miRNA	-0.372726	0.837725	-1.31411	0.197466	0.989147
MIMAT0029898	mmu-miR-7686-5p	miRNA	-0.376073	5.31673	-0.234692	0.815833	0.989147
MIMAT0028008	mmu-miR-7052-5p	miRNA	-0.376842	1.38781	-0.717368	0.477968	0.989147
MIMAT0004825	mmu-miR-423-5p	miRNA	-0.378462	4.24042	-0.261949	0.794916	0.989147
MIMAT0027788	mmu-miR-6944-5p	miRNA	-0.386829	3.00761	-0.335148	0.739539	0.989147
MIMAT0027760	mmu-miR-6930-5p	miRNA	-0.389162	0.890509	-2.21503	0.0334468	0.875091
MIMAT0000704	mmu-miR-361-5p	miRNA	-0.393446	1.42657	-0.677182	0.502798	0.989147
MIMAT0029858	mmu-miR-7675-5p	miRNA	-0.39392	0.607967	-2.00897	0.0524027	0.944365
MIMAT0007879	mmu-miR-1893	miRNA	-0.397986	2.16303	-0.568654	0.573268	0.989147
MIMAT0027884	mmu-miR-6991-5p	miRNA	-0.400824	2.15483	-0.408473	0.685446	0.989147
MIMAT0017327	mmu-miR-669f-5p	miRNA	-0.401594	0.946997	-1.09899	0.27937	0.989147
MIMAT0017042	mmu-miR-351-3p	miRNA	-0.402382	0.977888	-1.21864	0.231234	0.989147
MIMAT0014810	mmu-miR-1298-3p	miRNA	-0.403582	0.574557	-1.51798	0.138115	0.989147
MIMAT0028040	mmu-miR-6769b-5p	miRNA	-0.410629	1.92307	-0.596612	0.554655	0.989147
MIMAT0025090	mmu-miR-6347	miRNA	-0.416473	3.33764	-0.420015	0.677075	0.989147
MIMAT0014939	mmu-miR-3104-5p	miRNA	-0.420411	1.38058	-0.704006	0.486146	0.989147
MIMAT0000569	mmu-miR-330-3p	miRNA	-0.421056	0.890219	-0.914604	0.366737	0.989147
MIMAT0020646	mmu-miR-5135	miRNA	-0.423112	1.48376	-0.949043	0.349188	0.989147
MIMAT0000141	mmu-miR-130a-3p	miRNA	-0.431685	0.474275	-2.04608	0.0484167	0.944365
MIMAT0025095	mmu-miR-6352	miRNA	-0.438047	0.643708	-2.94453	0.00574984	0.65952
MIMAT0004861	mmu-miR-877-5p	miRNA	-0.448599	3.34663	-0.490542	0.626851	0.989147
MIMAT0025131	mmu-miR-6385	miRNA	-0.457135	0.877447	-1.66291	0.105375	0.989147
MIMAT0029809	mmu-miR-7036b-3p	miRNA	-0.460773	0.938268	-1.38084	0.176192	0.989147
MIMAT0027747	mmu-miR-6923-3p	miRNA	-0.465812	1.02133	-1.27443	0.211014	0.989147
MIMAT0027700	mmu-miR-6900-5p	miRNA	-0.474374	0.978636	-1.70999	0.0962328	0.978695
MIMAT0014804	mmu-miR-1249-5p	miRNA	-0.474616	1.20852	-1.4132	0.16654	0.989147
MIMAT0004881	mmu-miR-466f-5p	miRNA	-0.491561	0.742684	-1.94554	0.0598792	0.944365
MIMAT0027775	mmu-miR-6937-3p	miRNA	-0.50184	0.637569	-2.43873	0.0200219	0.734323
MIMAT0027904	mmu-miR-7001-5p	miRNA	-0.504012	3.60342	-0.512288	0.611708	0.989147
MIMAT0031406	mmu-miR-8102	miRNA	-0.508489	1.34867	-1.58415	0.122268	0.989147
MIMAT0027936	mmu-miR-7016-5p	miRNA	-0.509503	1.07294	-0.932106	0.357748	0.989147
MIMAT0009441	mmu-miR-1968-5p	miRNA	-0.516385	0.673237	-1.71541	0.095224	0.978695
MIMAT0027832	mmu-miR-3547-5p	miRNA	-0.523073	5.58378	-0.414085	0.681371	0.989147
MIMAT0028133	mmu-miR-7118-5p	miRNA	-0.528134	3.05594	-0.497241	0.622168	0.989147
MIMAT0000651	mmu-miR-19a-3p	miRNA	-0.528939	0.815167	-2.00368	0.0529932	0.944365
MIMAT0000654	mmu-miR-32-5p	miRNA	-0.531821	0.62389	-1.56295	0.127175	0.989147
MIMAT0029822	mmu-miR-7658-5p	miRNA	-0.532839	2.8762	-0.522842	0.60442	0.989147
MIMAT0000154	mmu-miR-142-5p	miRNA	-0.536639	0.284515	-3.1918	0.00300757	0.521676
MIMAT0027862	mmu-miR-6980-5p	miRNA	-0.543233	1.4767	-1.11246	0.273619	0.989147
MIMAT0020637	mmu-miR-5126	miRNA	-0.548699	10.5312	-1.00977	0.319624	0.989147
MIMAT0000545	mmu-miR-98-5p	miRNA	-0.550436	1.08115	-1.05432	0.299053	0.989147
MIMAT0009456	mmu-miR-1839-5p	miRNA	-0.555795	0.608246	-3.05788	0.00428401	0.583849
MIMAT0004859	mmu-miR-193b-3p	miRNA	-0.555983	1.74286	-0.738888	0.464964	0.989147
MIMAT0031420	mmu-miR-8114	miRNA	-0.560048	1.3195	-1.30383	0.200908	0.989147
MIMAT0000534	mmu-miR-26b-5p	miRNA	-0.5667	0.62898	-1.92599	0.0623637	0.944365
MIMAT0025587	mmu-miR-3473e	miRNA	-0.572573	2.02584	-0.741278	0.463532	0.989147
MIMAT0009393	mmu-miR-1930-5p	miRNA	-0.57446	1.01256	-2.07243	0.0457505	0.944365
MIMAT0017353	mmu-miR-664-5p	miRNA	-0.579249	1.27932	-1.65209	0.107574	0.989147
MIMAT0027844	mmu-miR-6971-5p	miRNA	-0.584914	1.06839	-1.27129	0.212114	0.989147
MIMAT0003151	mmu-miR-378a-3p	miRNA	-0.608469	3.27213	-0.516525	0.608777	0.989147
MIMAT0029879	mmu-miR-3620-3p	miRNA	-0.613219	1.24296	-1.08438	0.285702	0.989147
MIMAT0000537	mmu-miR-27a-3p	miRNA	-0.615485	0.502886	-3.09235	0.00391354	0.574387
MIMAT0022373	mmu-miR-5623-5p	miRNA	-0.626653	1.06932	-2.69353	0.0108315	0.66666
MIMAT0000151	mmu-miR-140-5p	miRNA	-0.644831	0.411928	-4.77711	3.22283e-05	0.0307458
MIMAT0000213	mmu-miR-184-3p	miRNA	-0.646632	0.633127	-2.58841	0.0140076	0.72234
MIMAT0027914	mmu-miR-7005-5p	miRNA	-0.651428	1.03278	-1.29492	0.203931	0.989147
MIMAT0027752	mmu-miR-6926-5p	miRNA	-0.654188	1.03596	-1.77214	0.0851882	0.978695
MIMAT0020632	mmu-miR-3473d	miRNA	-0.654803	1.85493	-1.18362	0.24464	0.989147
MIMAT0017245	mmu-miR-760-5p	miRNA	-0.6549	1.02849	-2.29342	0.0280246	0.82263
MIMAT0003505	mmu-miR-714	miRNA	-0.65492	1.57422	-1.34187	0.188388	0.989147
MIMAT0003127	mmu-miR-484	miRNA	-0.666532	2.16629	-0.780401	0.440467	0.989147
MIMAT0003490	mmu-miR-700-3p	miRNA	-0.67248	1.598	-1.29878	0.20262	0.989147
MIMAT0003481	mmu-miR-695	miRNA	-0.674703	1.68306	-1.01327	0.317971	0.989147
MIMAT0001342	mmu-miR-425-3p	miRNA	-0.676318	1.12474	-1.96234	0.0578142	0.944365
MIMAT0000160	mmu-miR-150-5p	miRNA	-0.68773	3.02706	-0.554027	0.583127	0.989147
MIMAT0015643	mmu-miR-3472	miRNA	-0.69398	0.811749	-1.50036	0.142602	0.989147
MIMAT0014933	mmu-miR-3102-5p	miRNA	-0.711027	3.7516	-0.563038	0.577044	0.989147
MIMAT0013803	mmu-miR-2861	miRNA	-0.71787	9.27393	-1.05007	0.300974	0.989147
MIMAT0004626	mmu-miR-18a-3p	miRNA	-0.736463	1.26842	-1.45765	0.153964	0.989147
MIMAT0014862	mmu-miR-3077-5p	miRNA	-0.750602	6.35086	-0.604084	0.549733	0.989147
MIMAT0027838	mmu-miR-6968-5p	miRNA	-0.755563	3.75063	-0.627261	0.53461	0.989147
MIMAT0020367	mmu-miR-3473b	miRNA	-0.762669	3.31689	-0.828374	0.413143	0.989147
MIMAT0025123	mmu-let-7j	miRNA	-0.771487	1.22018	-1.98668	0.0549311	0.944365
MIMAT0000383	mmu-let-7d-5p	miRNA	-0.784336	7.57235	-0.549414	0.586254	0.989147
MIMAT0027724	mmu-miR-6912-5p	miRNA	-0.79244	0.677706	-1.90185	0.0655517	0.946763
MIMAT0031405	mmu-miR-8101	miRNA	-0.797737	3.54999	-0.672352	0.50583	0.989147
MIMAT0016988	mmu-miR-144-5p	miRNA	-0.797967	0.914645	-2.83846	0.00753818	0.65952
MIMAT0000524	mmu-let-7e-5p	miRNA	-0.838891	2.15825	-0.986147	0.330915	0.989147
MIMAT0000605	mmu-miR-350-3p	miRNA	-0.854697	0.700978	-3.36845	0.00186852	0.406773
MIMAT0000539	mmu-miR-92a-3p	miRNA	-0.856068	7.57017	-0.556423	0.581507	0.989147
MIMAT0019348	mmu-miR-378b	miRNA	-0.857373	1.61692	-1.39557	0.171745	0.989147
MIMAT0014944	mmu-miR-3107-3p	miRNA	-0.860533	5.39811	-0.55044	0.585558	0.989147
MIMAT0003711	mmu-miR-652-3p	miRNA	-0.88091	4.56594	-0.516462	0.608821	0.989147
MIMAT0017206	mmu-miR-486-3p	miRNA	-0.891802	5.35608	-0.565136	0.575631	0.989147
MIMAT0025138	mmu-miR-378c	miRNA	-0.891986	1.91007	-1.29308	0.204561	0.989147
MIMAT0031416	mmu-miR-8110	miRNA	-0.923486	6.06537	-0.675104	0.504101	0.989147
MIMAT0024864	mmu-miR-6244	miRNA	-0.930477	1.22972	-2.19823	0.0347242	0.876807
MIMAT0007878	mmu-miR-1894-3p	miRNA	-0.93383	1.61975	-1.71462	0.0953711	0.978695
MIMAT0017246	mmu-miR-677-3p	miRNA	-0.943426	1.21868	-1.73299	0.0920121	0.978695
MIMAT0016990	mmu-miR-149-3p	miRNA	-0.972859	8.04965	-1.02089	0.314401	0.989147
MIMAT0027998	mmu-miR-7047-5p	miRNA	-0.992101	6.63096	-0.736536	0.466375	0.989147
MIMAT0000590	mmu-miR-342-3p	miRNA	-1.01667	1.86015	-1.07378	0.290361	0.989147
MIMAT0007871	mmu-miR-1892	miRNA	-1.04336	2.71513	-1.13007	0.26623	0.989147
MIMAT0017259	mmu-miR-505-5p	miRNA	-1.05524	2.84666	-1.07456	0.290015	0.989147
MIMAT0017237	mmu-miR-668-5p	miRNA	-1.07966	3.39318	-1.01115	0.318973	0.989147
MIMAT0000125	mmu-miR-23b-3p	miRNA	-1.08809	1.91138	-1.51152	0.139748	0.989147
MIMAT0027994	mmu-miR-7045-5p	miRNA	-1.10174	4.17299	-0.867911	0.39143	0.989147
MIMAT0000132	mmu-miR-99b-5p	miRNA	-1.13885	1.75872	-1.39786	0.171063	0.989147
MIMAT0000546	mmu-miR-103-3p	miRNA	-1.18032	6.45006	-0.820712	0.417435	0.989147
MIMAT0000538	mmu-miR-31-5p	miRNA	-1.18246	2.73228	-1.10278	0.277744	0.989147
MIMAT0027926	mmu-miR-7011-5p	miRNA	-1.19196	1.27513	-2.0239	0.0507652	0.944365
MIMAT0000666	mmu-miR-320-3p	miRNA	-1.21231	7.26553	-0.999478	0.32451	0.989147
MIMAT0000535	mmu-miR-29a-3p	miRNA	-1.22177	1.37018	-1.57261	0.124919	0.989147
MIMAT0000130	mmu-miR-30b-5p	miRNA	-1.22179	1.2667	-2.51908	0.01655	0.727368
MIMAT0028020	mmu-miR-7058-5p	miRNA	-1.23095	0.969035	-3.3587	0.00191874	0.406773
MIMAT0000525	mmu-let-7f-5p	miRNA	-1.23888	2.85444	-1.14947	0.258256	0.989147
MIMAT0000156	mmu-miR-144-3p	miRNA	-1.27334	0.940932	-3.38391	0.00179142	0.406773
MIMAT0002889	mmu-miR-532-5p	miRNA	-1.28401	1.04471	-3.1083	0.0037526	0.574387
MIMAT0000224	mmu-miR-194-5p	miRNA	-1.30008	1.28048	-2.47571	0.0183489	0.734323
MIMAT0000669	mmu-miR-221-3p	miRNA	-1.30266	2.95414	-1.16529	0.251882	0.989147
MIMAT0000532	mmu-miR-23a-3p	miRNA	-1.30759	2.61988	-1.50234	0.142091	0.989147
MIMAT0000647	mmu-miR-107-3p	miRNA	-1.30902	5.50324	-0.9003	0.374191	0.989147
MIMAT0004636	mmu-miR-93-3p	miRNA	-1.33876	1.85753	-1.70968	0.0962897	0.978695
MIMAT0000514	mmu-miR-30c-5p	miRNA	-1.34272	2.77797	-1.15216	0.257162	0.989147
MIMAT0000221	mmu-miR-191-5p	miRNA	-1.41977	7.02083	-1.10311	0.277601	0.989147
MIMAT0000515	mmu-miR-30d-5p	miRNA	-1.44525	2.62104	-1.444	0.157744	0.989147
MIMAT0000122	mmu-let-7i-5p	miRNA	-1.47955	4.26217	-0.948163	0.34963	0.989147
MIMAT0000219	mmu-miR-24-3p	miRNA	-1.49364	4.5935	-1.05821	0.297302	0.989147
MIMAT0000121	mmu-let-7g-5p	miRNA	-1.51691	3.08266	-1.46723	0.151354	0.989147
MIMAT0000214	mmu-miR-185-5p	miRNA	-1.62208	4.9874	-1.00237	0.323131	0.989147
MIMAT0000530	mmu-miR-21a-5p	miRNA	-1.6243	0.815288	-3.30618	0.00221242	0.422129
MIMAT0004750	mmu-miR-425-5p	miRNA	-1.70081	3.40921	-1.28385	0.207734	0.989147
MIMAT0000657	mmu-miR-200c-3p	miRNA	-1.74734	3.46365	-1.31485	0.197217	0.989147
MIMAT0000225	mmu-miR-195a-5p	miRNA	-1.76547	1.07674	-2.76089	0.00916247	0.65952
MIMAT0000385	mmu-miR-106a-5p	miRNA	-1.76574	2.67336	-1.74128	0.0905298	0.978695
MIMAT0000248	mmu-miR-30e-5p	miRNA	-1.77859	0.760136	-4.41058	9.57362e-05	0.0608882
MIMAT0011213	mmu-miR-2137	miRNA	-1.79004	7.21689	-1.89857	0.0659955	0.946763
MIMAT0000670	mmu-miR-222-3p	miRNA	-1.7936	4.29407	-1.26094	0.215777	0.989147
MIMAT0000531	mmu-miR-22-3p	miRNA	-1.79615	2.89356	-1.5458	0.131262	0.989147
MIMAT0004582	mmu-miR-106b-3p	miRNA	-1.84558	5.1461	-1.08403	0.285855	0.989147
MIMAT0000649	mmu-miR-17-5p	miRNA	-1.8986	5.05935	-1.37912	0.176716	0.989147
MIMAT0000128	mmu-miR-30a-5p	miRNA	-1.90931	2.51155	-1.89009	0.0671551	0.953334
MIMAT0000658	mmu-miR-210-3p	miRNA	-1.9551	2.38884	-2.24832	0.0310387	0.866375
MIMAT0000652	mmu-miR-25-3p	miRNA	-1.97628	4.64446	-1.31852	0.196	0.989147
MIMAT0003187	mmu-miR-20b-5p	miRNA	-1.98108	0.803886	-3.63145	0.000903873	0.344918
MIMAT0000387	mmu-miR-130b-3p	miRNA	-2.00432	2.71837	-2.10206	0.0429066	0.944365
MIMAT0005460	mmu-miR-1224-5p	miRNA	-2.08102	5.69749	-1.51441	0.139014	0.989147
MIMAT0000533	mmu-miR-26a-5p	miRNA	-2.27414	3.93033	-1.57059	0.125389	0.989147
MIMAT0000528	mmu-miR-18a-5p	miRNA	-2.37087	2.03003	-2.88131	0.00676072	0.65952
MIMAT0000513	mmu-miR-19b-3p	miRNA	-2.47046	0.914075	-3.96911	0.000346671	0.165362
MIMAT0027970	mmu-miR-7033-5p	miRNA	-2.52493	1.95639	-2.55794	0.0150771	0.727368
MIMAT0000152	mmu-miR-140-3p	miRNA	-2.6395	6.14401	-1.73225	0.0921459	0.978695
MIMAT0000540	mmu-miR-93-5p	miRNA	-2.69736	7.66921	-1.94081	0.0604727	0.944365
MIMAT0000527	mmu-miR-16-5p	miRNA	-2.78893	7.27742	-1.9078	0.0647531	0.946763
MIMAT0000526	mmu-miR-15a-5p	miRNA	-2.79449	1.52301	-3.42589	0.00159717	0.406773
MIMAT0000386	mmu-miR-106b-5p	miRNA	-3.42464	3.77785	-2.20848	0.0339396	0.875091
MIMAT0000529	mmu-miR-20a-5p	miRNA	-3.50715	3.85825	-2.50963	0.0169275	0.727368
MIMAT0001632	mmu-miR-451a	miRNA	-3.71041	5.93282	-2.60393	0.0134901	0.714973

## Sheet: Blood_50_ICRR_vs_AL
Accession	Transcript.ID.Array.Design.	Sequence.Type	logFC	AveExpr	t	P.Value	adj.P.Val
MIMAT0000565	mmu-miR-328-3p	miRNA	4.66757	4.43358	2.67982	0.0112041	0.319065
MIMAT0003499	mmu-miR-709	miRNA	3.96463	6.63719	2.47723	0.0182831	0.390745
MIMAT0028129	mmu-miR-7116-5p	miRNA	3.53677	4.77427	1.91471	0.0638361	0.651333
MIMAT0000210	mmu-miR-181a-5p	miRNA	3.35225	2.69817	3.12638	0.00357778	0.189622
MIMAT0025583	mmu-miR-6538	miRNA	3.16839	8.67707	3.77137	0.000609595	0.0808901
MIMAT0017049	mmu-miR-25-5p	miRNA	3.16466	2.29443	3.45087	0.00149138	0.127797
MIMAT0027762	mmu-miR-6931-5p	miRNA	3.07506	2.71064	2.90541	0.0063572	0.236748
MIMAT0004825	mmu-miR-423-5p	miRNA	3.01394	4.24042	2.08607	0.0444213	0.592698
MIMAT0004899	mmu-miR-92b-3p	miRNA	2.86783	2.12104	3.48006	0.00137628	0.127797
MIMAT0003182	mmu-miR-494-3p	miRNA	2.85928	2.4035	4.42553	9.16056e-05	0.0291306
MIMAT0027728	mmu-miR-6914-5p	miRNA	2.75734	2.61885	2.59433	0.0138081	0.346093
MIMAT0000161	mmu-miR-151-3p	miRNA	2.6692	2.52288	2.64372	0.0122426	0.332489
MIMAT0003454	mmu-miR-423-3p	miRNA	2.66807	2.79428	2.49265	0.017626	0.390743
MIMAT0003740	mmu-miR-674-5p	miRNA	2.62968	4.19306	1.58534	0.121998	0.750061
MIMAT0024860	mmu-miR-6239	miRNA	2.5859	2.24119	3.40863	0.00167448	0.127797
MIMAT0028070	mmu-miR-7082-5p	miRNA	2.30004	2.02736	2.89215	0.00657633	0.236748
MIMAT0000135	mmu-miR-125a-5p	miRNA	2.19739	0.927563	6.04986	6.96633e-07	0.000505875
MIMAT0025146	mmu-miR-6395	miRNA	2.17542	1.51251	4.17348	0.000191855	0.0519377
MIMAT0003496	mmu-miR-706	miRNA	2.17248	3.42228	1.40851	0.167913	0.785242
MIMAT0005859	mmu-miR-1198-5p	miRNA	2.1342	2.94937	1.92229	0.0628434	0.648728
MIMAT0009458	mmu-miR-1981-5p	miRNA	2.12613	3.3521	2.05923	0.047069	0.603433
MIMAT0028048	mmu-miR-7071-5p	miRNA	2.11054	0.790916	7.49096	9.72098e-09	1.85476e-05
MIMAT0000376	mmu-miR-298-5p	miRNA	2.0641	1.02708	6.00584	7.95401e-07	0.000505875
MIMAT0024861	mmu-miR-6240	miRNA	2.05166	5.40663	1.20429	0.236659	0.833899
MIMAT0004187	mmu-miR-744-5p	miRNA	2.03293	5.18	1.29927	0.202453	0.821897
MIMAT0027992	mmu-miR-7044-5p	miRNA	1.96822	5.44693	1.44838	0.156524	0.780676
MIMAT0025580	mmu-let-7k	miRNA	1.93165	0.696095	3.82267	0.00052699	0.0808901
MIMAT0029878	mmu-miR-3620-5p	miRNA	1.88911	5.08942	1.22682	0.228183	0.832452
MIMAT0029799	mmu-miR-7648-3p	miRNA	1.88507	5.71634	1.28986	0.205665	0.821897
MIMAT0020641	mmu-miR-5130	miRNA	1.87928	4.06067	1.39048	0.173274	0.791858
MIMAT0017039	mmu-miR-346-3p	miRNA	1.83422	6.62506	1.40666	0.168458	0.785863
MIMAT0004781	mmu-miR-532-3p	miRNA	1.77707	1.80434	2.94261	0.0057783	0.234574
MIMAT0017030	mmu-miR-328-5p	miRNA	1.75085	2.88911	1.743	0.0902248	0.710552
MIMAT0000384	mmu-let-7d-3p	miRNA	1.71484	0.726932	3.45454	0.00147641	0.127797
MIMAT0003495	mmu-miR-705	miRNA	1.69904	2.64075	1.53488	0.133917	0.750061
MIMAT0003509	mmu-miR-501-3p	miRNA	1.69301	1.53595	2.80511	0.0082004	0.268756
MIMAT0000539	mmu-miR-92a-3p	miRNA	1.6659	7.57017	1.08279	0.286397	0.855502
MIMAT0005856	mmu-miR-1195	miRNA	1.64675	1.94855	2.24437	0.0313165	0.493817
MIMAT0020643	mmu-miR-5132-5p	miRNA	1.63052	1.47945	2.60636	0.0134106	0.346093
MIMAT0016996	mmu-miR-185-3p	miRNA	1.60165	0.921708	3.93376	0.000383704	0.0808901
MIMAT0009411	mmu-miR-1306-3p	miRNA	1.56311	1.5507	2.4073	0.0215521	0.419607
MIMAT0029849	mmu-miR-7671-3p	miRNA	1.54835	2.59555	2.13157	0.0402312	0.575692
MIMAT0000650	mmu-miR-17-3p	miRNA	1.54597	3.38408	1.17068	0.249734	0.833899
MIMAT0000524	mmu-let-7e-5p	miRNA	1.53488	2.15825	1.8043	0.0799045	0.698705
MIMAT0027838	mmu-miR-6968-5p	miRNA	1.5217	3.75063	1.2633	0.214938	0.825795
MIMAT0028068	mmu-miR-7081-5p	miRNA	1.49795	2.09642	2.44697	0.0196376	0.394405
MIMAT0007879	mmu-miR-1893	miRNA	1.47861	2.16303	2.11267	0.0419269	0.575692
MIMAT0027806	mmu-miR-6953-5p	miRNA	1.478	2.28577	2.134	0.0400175	0.575692
MIMAT0000666	mmu-miR-320-3p	miRNA	1.47205	7.26553	1.21363	0.233119	0.833899
MIMAT0000569	mmu-miR-330-3p	miRNA	1.46487	0.890219	3.18194	0.0030876	0.188055
MIMAT0017059	mmu-miR-211-3p	miRNA	1.44593	2.96247	1.38873	0.173799	0.791858
MIMAT0000124	mmu-miR-15b-5p	miRNA	1.40821	5.60219	0.742107	0.463036	0.934125
MIMAT0003130	mmu-miR-486-5p	miRNA	1.40263	10.7344	1.85812	0.0716869	0.683893
MIMAT0014943	mmu-miR-3107-5p	miRNA	1.40263	10.7344	1.85812	0.0716869	0.683893
MIMAT0020645	mmu-miR-5134-5p	miRNA	1.38331	1.09044	3.11144	0.00372165	0.191916
MIMAT0009437	mmu-miR-1964-3p	miRNA	1.37778	0.698126	4.12993	0.000217768	0.0519377
MIMAT0027788	mmu-miR-6944-5p	miRNA	1.37511	3.00761	1.19139	0.241617	0.833899
MIMAT0028438	mmu-miR-7235-5p	miRNA	1.35962	2.76707	1.00554	0.321627	0.86553
MIMAT0020607	mmu-miR-5100	miRNA	1.32962	2.27828	1.27258	0.211663	0.82419
MIMAT0027832	mmu-miR-3547-5p	miRNA	1.32919	5.58378	1.05224	0.299991	0.862023
MIMAT0027996	mmu-miR-7046-5p	miRNA	1.32392	1.29149	2.45814	0.0191272	0.392564
MIMAT0003127	mmu-miR-484	miRNA	1.29961	2.16629	1.52163	0.137199	0.750234
MIMAT0000522	mmu-let-7b-5p	miRNA	1.29847	8.7851	1.10621	0.276277	0.844606
MIMAT0003892	mmu-miR-762	miRNA	1.28216	7.36168	1.34415	0.187656	0.808522
MIMAT0000559	mmu-miR-326-3p	miRNA	1.27682	1.27494	3.13178	0.00352703	0.189622
MIMAT0027754	mmu-miR-6927-5p	miRNA	1.26502	0.990572	4.4577	8.33026e-05	0.0291306
MIMAT0031420	mmu-miR-8114	miRNA	1.24497	1.3195	2.89839	0.0064723	0.236748
MIMAT0025124	mmu-miR-6378	miRNA	1.20363	0.924718	2.53655	0.0158724	0.36053
MIMAT0017341	mmu-miR-1934-3p	miRNA	1.19036	3.392	0.898291	0.375246	0.890382
MIMAT0029898	mmu-miR-7686-5p	miRNA	1.17788	5.31673	0.735065	0.467259	0.934125
MIMAT0003469	mmu-miR-690	miRNA	1.17177	2.76896	1.04485	0.303343	0.86553
MIMAT0017256	mmu-miR-700-5p	miRNA	1.16449	0.937772	3.80421	0.00055538	0.0808901
MIMAT0019336	mmu-miR-3960	miRNA	1.15967	9.08485	1.73937	0.09087	0.710552
MIMAT0003151	mmu-miR-378a-3p	miRNA	1.13098	3.27213	0.960079	0.343684	0.87629
MIMAT0027842	mmu-miR-6970-5p	miRNA	1.12899	5.20926	0.79377	0.432745	0.925648
MIMAT0031405	mmu-miR-8101	miRNA	1.1267	3.54999	0.949606	0.348906	0.878182
MIMAT0028411	mmu-miR-7221-3p	miRNA	1.10343	5.52108	0.747135	0.460035	0.934125
MIMAT0014934	mmu-miR-3102-5p.2-5p	miRNA	1.09961	0.983999	2.4654	0.0188022	0.392564
MIMAT0029902	mmu-miR-7687-5p	miRNA	1.04411	1.58043	2.19432	0.0350275	0.53466
MIMAT0024859	mmu-miR-6238	miRNA	1.04403	1.44489	1.8144	0.0783048	0.691871
MIMAT0003782	mmu-miR-676-3p	miRNA	1.0435	2.115	1.16334	0.252662	0.833899
MIMAT0014862	mmu-miR-3077-5p	miRNA	1.03347	6.35086	0.831735	0.411268	0.918736
MIMAT0017027	mmu-miR-326-5p	miRNA	1.01923	0.94961	2.63941	0.0123725	0.332489
MIMAT0000545	mmu-miR-98-5p	miRNA	0.996636	1.08115	1.90898	0.0645963	0.655584
MIMAT0025167	mmu-miR-378d	miRNA	0.968706	1.1079	2.17928	0.036217	0.54411
MIMAT0000538	mmu-miR-31-5p	miRNA	0.967017	2.73228	0.901856	0.373376	0.889389
MIMAT0029822	mmu-miR-7658-5p	miRNA	0.965945	2.8762	0.947823	0.3498	0.878182
MIMAT0000766	mmu-miR-335-5p	miRNA	0.964761	0.99355	1.50135	0.142345	0.754836
MIMAT0031422	mmu-miR-8116	miRNA	0.941838	1.5537	2.48733	0.0178501	0.390743
MIMAT0003479	mmu-miR-669c-5p	miRNA	0.886247	1.05116	3.53654	0.00117735	0.124799
MIMAT0000556	mmu-miR-324-3p	miRNA	0.879028	1.23934	1.83106	0.0757235	0.691328
MIMAT0027976	mmu-miR-7036-5p	miRNA	0.862904	1.8718	1.24782	0.220487	0.828128
MIMAT0027698	mmu-miR-6899-5p	miRNA	0.856441	0.878541	3.55256	0.00112616	0.124799
MIMAT0004893	mmu-miR-574-5p	miRNA	0.850391	1.71445	1.57256	0.124932	0.750061
MIMAT0022931	mmu-miR-702-5p	miRNA	0.849854	1.1156	2.14443	0.039112	0.574044
MIMAT0027998	mmu-miR-7047-5p	miRNA	0.831173	6.63096	0.617063	0.541237	0.942698
MIMAT0017206	mmu-miR-486-3p	miRNA	0.818606	5.35608	0.518752	0.60724	0.967856
MIMAT0020618	mmu-miR-5110	miRNA	0.800114	0.873724	2.12001	0.0412614	0.575692
MIMAT0014901	mmu-miR-3090-5p	miRNA	0.794245	1.04271	1.65136	0.107724	0.73406
MIMAT0009444	mmu-miR-1970	miRNA	0.781759	0.538995	1.94188	0.0603373	0.643666
MIMAT0027848	mmu-miR-6973a-5p	miRNA	0.757246	1.31817	1.78351	0.0832865	0.698705
MIMAT0027994	mmu-miR-7045-5p	miRNA	0.754627	4.17299	0.594465	0.556073	0.947475
MIMAT0028076	mmu-miR-7085-5p	miRNA	0.744345	1.45251	0.906078	0.371168	0.889235
MIMAT0014944	mmu-miR-3107-3p	miRNA	0.736232	5.39811	0.470931	0.640649	0.969356
MIMAT0017259	mmu-miR-505-5p	miRNA	0.729606	2.84666	0.742969	0.462521	0.934125
MIMAT0005850	mmu-miR-1192	miRNA	0.69718	0.984822	1.4737	0.149612	0.775308
MIMAT0020615	mmu-miR-5107-5p	miRNA	0.692102	1.29326	1.51769	0.138188	0.750234
MIMAT0028044	mmu-miR-7069-5p	miRNA	0.691649	1.52542	1.07383	0.290341	0.855502
MIMAT0027774	mmu-miR-6937-5p	miRNA	0.688976	6.6014	0.549231	0.586378	0.961375
MIMAT0017325	mmu-miR-466i-5p	miRNA	0.686101	1.67178	1.55904	0.128098	0.750061
MIMAT0013803	mmu-miR-2861	miRNA	0.681981	9.27393	0.99757	0.325421	0.86553
MIMAT0003742	mmu-miR-455-3p	miRNA	0.671834	1.25589	1.00468	0.322032	0.86553
MIMAT0028133	mmu-miR-7118-5p	miRNA	0.671185	3.05594	0.631924	0.531594	0.942101
MIMAT0017019	mmu-miR-23a-5p	miRNA	0.662698	0.48461	2.68781	0.0109855	0.319065
MIMAT0028444	mmu-miR-7238-5p	miRNA	0.648262	3.29508	0.746879	0.460188	0.934125
MIMAT0000214	mmu-miR-185-5p	miRNA	0.647772	4.9874	0.400294	0.691404	0.973722
MIMAT0000523	mmu-let-7c-5p	miRNA	0.644101	7.65493	0.483706	0.631645	0.969356
MIMAT0025162	mmu-miR-6409	miRNA	0.643295	1.42161	1.23644	0.224632	0.829852
MIMAT0000656	mmu-miR-139-5p	miRNA	0.642607	0.928997	1.33084	0.191956	0.817527
MIMAT0017052	mmu-miR-210-5p	miRNA	0.62795	0.760267	2.91125	0.0062628	0.236748
MIMAT0004861	mmu-miR-877-5p	miRNA	0.626905	3.34663	0.685518	0.49759	0.934125
MIMAT0029830	mmu-miR-7662-5p	miRNA	0.621933	0.941468	1.6065	0.117263	0.750061
MIMAT0028082	mmu-miR-7088-5p	miRNA	0.621789	1.0549	1.43052	0.161547	0.785242
MIMAT0028038	mmu-miR-7067-5p	miRNA	0.614071	0.840581	2.00459	0.0528909	0.634691
MIMAT0027940	mmu-miR-7018-5p	miRNA	0.589261	1.02095	1.36481	0.181133	0.803985
MIMAT0027718	mmu-miR-6909-5p	miRNA	0.571341	1.89955	0.816181	0.419987	0.920806
MIMAT0029823	mmu-miR-7658-3p	miRNA	0.561542	0.845722	1.9415	0.0603859	0.643666
MIMAT0027937	mmu-miR-7016-3p	miRNA	0.542669	0.452855	2.66344	0.0116646	0.322552
MIMAT0000673	mmu-miR-181b-5p	miRNA	0.538706	1.7039	0.942093	0.352684	0.881941
MIMAT0027950	mmu-miR-7023-5p	miRNA	0.534897	1.0023	1.232	0.226264	0.829852
MIMAT0014841	mmu-miR-3067-3p	miRNA	0.520041	0.73873	1.58149	0.122875	0.750061
MIMAT0029812	mmu-miR-7653-5p	miRNA	0.518026	2.18126	0.963269	0.342104	0.876154
MIMAT0003188	mmu-miR-503-5p	miRNA	0.500147	1.20823	1.12734	0.267363	0.836278
MIMAT0022357	mmu-miR-1231-5p	miRNA	0.481328	0.637189	2.47382	0.0184314	0.390745
MIMAT0017239	mmu-miR-667-5p	miRNA	0.477683	1.45419	0.960432	0.343509	0.87629
MIMAT0028042	mmu-miR-7068-5p	miRNA	0.470275	0.444713	2.99871	0.00499844	0.221791
MIMAT0031423	mmu-miR-8117	miRNA	0.468834	0.671848	3.07468	0.00409956	0.205841
MIMAT0000580	mmu-miR-148b-3p	miRNA	0.466905	0.787727	2.37799	0.0230736	0.444691
MIMAT0025135	mmu-miR-6388	miRNA	0.46101	1.17719	1.38319	0.175478	0.795277
MIMAT0027709	mmu-miR-6904-3p	miRNA	0.460321	0.768188	2.54042	0.0157256	0.36053
MIMAT0022989	mmu-miR-5134-3p	miRNA	0.45782	0.553706	3.13566	0.00349106	0.189622
MIMAT0025112	mmu-miR-6368	miRNA	0.454099	0.79567	1.16386	0.252454	0.833899
MIMAT0028046	mmu-miR-7070-5p	miRNA	0.448922	1.00249	1.20714	0.235575	0.833899
MIMAT0004894	mmu-miR-574-3p	miRNA	0.443828	0.689589	1.77797	0.0842091	0.70162
MIMAT0000609	mmu-miR-351-5p	miRNA	0.443596	1.28719	1.20875	0.234965	0.833899
MIMAT0028399	mmu-miR-7215-3p	miRNA	0.44209	0.647527	2.25713	0.0304282	0.493817
MIMAT0028039	mmu-miR-7067-3p	miRNA	0.441271	0.528713	3.02274	0.00469574	0.218524
MIMAT0031403	mmu-miR-8100	miRNA	0.438202	0.92548	1.88818	0.067419	0.66956
MIMAT0027952	mmu-miR-7024-5p	miRNA	0.436742	0.698424	1.75601	0.0879466	0.710552
MIMAT0027944	mmu-miR-7020-5p	miRNA	0.43526	1.10787	1.715	0.0952989	0.710552
MIMAT0007867	mmu-miR-1895	miRNA	0.43397	1.00026	1.57354	0.124704	0.750061
MIMAT0019348	mmu-miR-378b	miRNA	0.433516	1.61692	0.705648	0.485136	0.934125
MIMAT0027856	mmu-miR-6977-5p	miRNA	0.429605	0.923904	1.07036	0.291877	0.855502
MIMAT0029809	mmu-miR-7036b-3p	miRNA	0.42489	0.938268	1.27331	0.211406	0.82419
MIMAT0028034	mmu-miR-7065-5p	miRNA	0.423094	0.376138	2.90622	0.00634396	0.236748
MIMAT0003183	mmu-miR-376c-3p	miRNA	0.422132	0.585127	2.50174	0.0172489	0.387187
MIMAT0027984	mmu-miR-7040-5p	miRNA	0.417712	1.37408	1.00167	0.323465	0.86553
MIMAT0000525	mmu-let-7f-5p	miRNA	0.414865	2.85444	0.384921	0.702654	0.973722
MIMAT0016998	mmu-miR-190a-3p	miRNA	0.413315	1.38158	0.588498	0.560024	0.949597
MIMAT0027722	mmu-miR-6911-5p	miRNA	0.412407	0.820788	2.04182	0.0488606	0.60932
MIMAT0017060	mmu-miR-221-5p	miRNA	0.411262	0.523284	2.92415	0.0060591	0.236748
MIMAT0004867	mmu-miR-327	miRNA	0.408635	0.44814	2.60697	0.0133908	0.346093
MIMAT0014870	mmu-miR-3081-5p	miRNA	0.408311	1.10243	1.30878	0.199245	0.81931
MIMAT0009412	mmu-miR-1946a	miRNA	0.404006	1.0212	1.63076	0.112022	0.742144
MIMAT0003483	mmu-miR-696	miRNA	0.40111	0.405278	2.81715	0.0079554	0.266296
MIMAT0027755	mmu-miR-6927-3p	miRNA	0.399871	0.684723	2.1461	0.0389687	0.574044
MIMAT0017283	mmu-miR-598-5p	miRNA	0.399575	0.965171	1.21671	0.231957	0.833899
MIMAT0003731	mmu-miR-671-5p	miRNA	0.39695	1.10396	0.928151	0.359766	0.889235
MIMAT0014921	mmu-miR-3101-5p	miRNA	0.390102	0.70603	1.87561	0.0691761	0.676861
MIMAT0027922	mmu-miR-7009-5p	miRNA	0.388004	1.22341	1.4882	0.145767	0.765268
MIMAT0027988	mmu-miR-7042-5p	miRNA	0.386196	0.34674	2.77476	0.00885003	0.268756
MIMAT0029883	mmu-miR-7681-3p	miRNA	0.383157	0.672762	1.62582	0.113074	0.743949
MIMAT0009417	mmu-miR-1950	miRNA	0.379783	0.600729	1.68569	0.100866	0.719868
MIMAT0007871	mmu-miR-1892	miRNA	0.378869	2.71513	0.410354	0.684079	0.973722
MIMAT0014801	mmu-miR-1247-3p	miRNA	0.373743	1.29442	0.823926	0.415631	0.920806
MIMAT0004859	mmu-miR-193b-3p	miRNA	0.372185	1.74286	0.494625	0.623994	0.969356
MIMAT0014852	mmu-miR-3072-5p	miRNA	0.367833	1.05099	0.669122	0.507863	0.937929
MIMAT0017277	mmu-miR-504-3p	miRNA	0.363119	0.744431	1.281	0.208721	0.821897
MIMAT0028080	mmu-miR-7087-5p	miRNA	0.362581	0.614589	2.34725	0.0247733	0.467994
MIMAT0017000	mmu-miR-195a-3p	miRNA	0.361367	0.947959	1.76468	0.086454	0.704932
MIMAT0000647	mmu-miR-107-3p	miRNA	0.360128	5.50324	0.247684	0.805844	0.984531
MIMAT0027955	mmu-miR-7025-3p	miRNA	0.358336	0.75558	1.69968	0.0981765	0.715293
MIMAT0020629	mmu-miR-5121	miRNA	0.356694	0.599124	1.38705	0.174308	0.791858
MIMAT0009435	mmu-miR-1962	miRNA	0.355672	1.1228	1.05691	0.297885	0.85964
MIMAT0027898	mmu-miR-6998-5p	miRNA	0.35389	0.571166	2.05869	0.0471234	0.603433
MIMAT0027934	mmu-miR-7015-5p	miRNA	0.352302	0.311251	2.86158	0.00710893	0.251182
MIMAT0022367	mmu-miR-5620-5p	miRNA	0.350349	0.491261	1.99354	0.0541422	0.638482
MIMAT0009413	mmu-miR-1947-5p	miRNA	0.344354	0.8052	2.0659	0.0463987	0.603433
MIMAT0004643	mmu-miR-331-5p	miRNA	0.343285	0.954004	1.4191	0.164825	0.785242
MIMAT0027746	mmu-miR-6923-5p	miRNA	0.342166	0.729404	1.2863	0.20689	0.821897
MIMAT0020644	mmu-miR-5133	miRNA	0.342155	0.659003	1.71361	0.0955585	0.710552
MIMAT0014939	mmu-miR-3104-5p	miRNA	0.338111	1.38058	0.56619	0.574923	0.957892
MIMAT0028040	mmu-miR-6769b-5p	miRNA	0.337011	1.92307	0.489651	0.627475	0.969356
MIMAT0004662	mmu-miR-139-3p	miRNA	0.332222	1.01661	1.18622	0.243624	0.833899
MIMAT0003486	mmu-miR-491-5p	miRNA	0.329511	0.768263	1.19038	0.242008	0.833899
MIMAT0028400	mmu-miR-7216-5p	miRNA	0.327812	1.00313	1.71768	0.0948031	0.710552
MIMAT0027735	mmu-miR-6917-3p	miRNA	0.325734	0.366006	2.02802	0.0503217	0.615473
MIMAT0014804	mmu-miR-1249-5p	miRNA	0.32031	1.20852	0.953744	0.346836	0.87629
MIMAT0004879	mmu-miR-466e-5p	miRNA	0.317024	0.382799	2.58408	0.014155	0.346093
MIMAT0027773	mmu-miR-6936-3p	miRNA	0.316723	0.643764	1.81589	0.0780703	0.691871
MIMAT0000571	mmu-miR-331-3p	miRNA	0.315948	0.828462	1.16691	0.251236	0.833899
MIMAT0025090	mmu-miR-6347	miRNA	0.315777	3.33764	0.318463	0.75205	0.980729
MIMAT0027778	mmu-miR-6939-5p	miRNA	0.314049	1.35993	0.861241	0.395041	0.911619
MIMAT0027759	mmu-miR-6929-3p	miRNA	0.308546	0.5675	1.75049	0.0889071	0.710552
MIMAT0028011	mmu-miR-7053-3p	miRNA	0.308148	0.485716	2.21524	0.0334312	0.514409
MIMAT0003189	mmu-miR-291b-5p	miRNA	0.301201	0.60723	1.26469	0.214445	0.825795
MIMAT0022930	mmu-miR-698-5p	miRNA	0.300253	0.813243	1.4808	0.147719	0.771655
MIMAT0000138	mmu-miR-126a-3p	miRNA	0.298505	0.674933	1.34995	0.185807	0.807561
MIMAT0009392	mmu-miR-1929-5p	miRNA	0.296599	0.763291	1.5935	0.120153	0.750061
MIMAT0027943	mmu-miR-7019-3p	miRNA	0.296557	0.501394	1.68441	0.101114	0.719868
MIMAT0014875	mmu-miR-3083-3p	miRNA	0.295498	0.522028	1.96546	0.0574369	0.640674
MIMAT0003459	mmu-miR-682	miRNA	0.294523	0.666569	1.87301	0.0695452	0.677002
MIMAT0004545	mmu-miR-200b-5p	miRNA	0.293092	0.721004	1.43485	0.160319	0.785242
MIMAT0017251	mmu-miR-669a-3-3p	miRNA	0.292827	0.442473	2.44913	0.0195381	0.394405
MIMAT0029850	mmu-miR-7672-5p	miRNA	0.287484	0.875664	1.32915	0.192506	0.81778
MIMAT0027924	mmu-miR-7010-5p	miRNA	0.287219	0.755344	1.54231	0.132105	0.750061
MIMAT0025161	mmu-miR-6408	miRNA	0.285712	0.624305	1.59499	0.119819	0.750061
MIMAT0014927	mmu-miR-344c-5p	miRNA	0.28528	0.4583	2.04865	0.0481506	0.607857
MIMAT0003481	mmu-miR-695	miRNA	0.285249	1.68306	0.428389	0.671026	0.972151
MIMAT0027964	mmu-miR-7030-5p	miRNA	0.284067	0.831835	1.076	0.289382	0.855502
MIMAT0027768	mmu-miR-6934-5p	miRNA	0.283985	0.437546	1.83838	0.0746137	0.691328
MIMAT0027734	mmu-miR-6917-5p	miRNA	0.280397	0.764272	1.46586	0.151726	0.780676
MIMAT0028072	mmu-miR-7083-5p	miRNA	0.279888	1.08603	0.851426	0.400394	0.914912
MIMAT0004862	mmu-miR-877-3p	miRNA	0.279486	0.628647	1.53483	0.13393	0.750061
MIMAT0014936	mmu-miR-3102-3p	miRNA	0.279406	0.519171	1.9626	0.0577822	0.640674
MIMAT0022729	mmu-miR-1929-3p	miRNA	0.277493	0.341039	2.30884	0.0270559	0.489748
MIMAT0003507	mmu-miR-500-3p	miRNA	0.276676	1.40959	0.608889	0.546579	0.944036
MIMAT0028016	mmu-miR-7056-5p	miRNA	0.276246	0.465054	2.13288	0.0401159	0.575692
MIMAT0003172	mmu-miR-542-3p	miRNA	0.275832	0.317728	1.98056	0.0556444	0.638482
MIMAT0027819	mmu-miR-6959-3p	miRNA	0.275796	0.411324	2.26769	0.0297102	0.493817
MIMAT0025144	mmu-miR-6394	miRNA	0.274855	0.81914	1.69769	0.0985536	0.715293
MIMAT0028413	mmu-miR-7222-3p	miRNA	0.273955	0.773449	1.0739	0.29031	0.855502
MIMAT0022988	mmu-miR-5132-3p	miRNA	0.273704	0.292343	2.45798	0.0191344	0.392564
MIMAT0004877	mmu-miR-466c-5p	miRNA	0.267194	0.783802	1.3996	0.170546	0.788968
MIMAT0029831	mmu-miR-7662-3p	miRNA	0.266543	1.67765	0.430058	0.669823	0.972151
MIMAT0004623	mmu-let-7f-1-3p	miRNA	0.265441	0.506339	2.23706	0.0318353	0.497882
MIMAT0029839	mmu-miR-7666-3p	miRNA	0.265177	1.23006	0.765516	0.449161	0.934125
MIMAT0027748	mmu-miR-6924-5p	miRNA	0.265146	0.656225	1.35655	0.18372	0.803985
MIMAT0027868	mmu-miR-6983-5p	miRNA	0.26235	0.914982	0.50323	0.617995	0.967856
MIMAT0003735	mmu-miR-672-5p	miRNA	0.26161	0.46945	1.94223	0.0602937	0.643666
MIMAT0027792	mmu-miR-6946-5p	miRNA	0.259851	0.834437	1.31278	0.197909	0.81931
MIMAT0022365	mmu-miR-5619-5p	miRNA	0.259596	0.606208	1.50777	0.1407	0.754089
MIMAT0031418	mmu-miR-8112	miRNA	0.258994	0.575012	1.51213	0.139592	0.750258
MIMAT0016980	mmu-miR-23b-5p	miRNA	0.258425	0.646527	1.58508	0.122056	0.750061
MIMAT0027343	mmu-miR-6516-5p	miRNA	0.256655	0.345819	1.69393	0.0992726	0.715293
MIMAT0009398	mmu-miR-1934-5p	miRNA	0.255077	0.608856	1.5382	0.133106	0.750061
MIMAT0009428	mmu-miR-1956	miRNA	0.254879	0.922726	0.811275	0.42276	0.920806
MIMAT0025101	mmu-miR-6358	miRNA	0.25327	0.469074	1.82796	0.0761984	0.691328
MIMAT0004759	mmu-miR-466a-5p	miRNA	0.252508	0.302798	1.91755	0.0634622	0.650999
MIMAT0028012	mmu-miR-7054-5p	miRNA	0.250158	0.683742	1.99035	0.054508	0.638482
MIMAT0004574	mmu-miR-294-5p	miRNA	0.249051	0.396911	1.8786	0.0687555	0.676214
MIMAT0027737	mmu-miR-6918-3p	miRNA	0.245083	0.470705	1.94431	0.0600332	0.643666
MIMAT0025138	mmu-miR-378c	miRNA	0.243829	1.91007	0.353469	0.725884	0.973722
MIMAT0028030	mmu-miR-7063-5p	miRNA	0.243084	0.499699	1.45617	0.154371	0.780676
MIMAT0005843	mmu-miR-1188-5p	miRNA	0.24307	0.592814	0.99463	0.326829	0.86553
MIMAT0007880	mmu-miR-1901	miRNA	0.242472	0.378218	2.10341	0.0427808	0.575692
MIMAT0016993	mmu-miR-155-3p	miRNA	0.240894	0.650368	1.11593	0.27215	0.841591
MIMAT0025076	mmu-miR-195b	miRNA	0.240246	0.668928	1.72095	0.0942027	0.710552
MIMAT0003377	mmu-miR-302d-3p	miRNA	0.239302	0.572813	1.67257	0.103442	0.726638
MIMAT0014822	mmu-miR-3057-5p	miRNA	0.237455	0.481577	1.31131	0.198398	0.81931
MIMAT0019355	mmu-miR-3970	miRNA	0.237368	0.529836	1.65469	0.107042	0.73406
MIMAT0029845	mmu-miR-7669-3p	miRNA	0.236935	2.46089	0.413229	0.681992	0.973722
MIMAT0000132	mmu-miR-99b-5p	miRNA	0.236591	1.75872	0.290399	0.773247	0.982514
MIMAT0022356	mmu-miR-5615-3p	miRNA	0.235707	0.316949	1.15267	0.256958	0.833899
MIMAT0027884	mmu-miR-6991-5p	miRNA	0.235605	2.15483	0.240101	0.811671	0.984531
MIMAT0022353	mmu-miR-3544-5p	miRNA	0.234532	0.603127	1.65268	0.107452	0.73406
MIMAT0027720	mmu-miR-6910-5p	miRNA	0.234278	0.650925	1.05607	0.298261	0.85964
MIMAT0004535	mmu-miR-150-3p	miRNA	0.233777	0.576646	1.31844	0.196026	0.81906
MIMAT0014929	mmu-miR-344g-5p	miRNA	0.232349	0.695737	0.808255	0.424472	0.921546
MIMAT0004653	mmu-miR-342-5p	miRNA	0.232236	0.425958	1.44817	0.156581	0.780676
MIMAT0005448	mmu-miR-467b-5p	miRNA	0.232163	0.269853	2.046	0.0484246	0.607857
MIMAT0014861	mmu-miR-3076-3p	miRNA	0.231526	0.461795	1.78935	0.0823251	0.698705
MIMAT0004633	mmu-miR-27a-5p	miRNA	0.231361	0.716192	1.54205	0.132168	0.750061
MIMAT0007873	mmu-miR-1896	miRNA	0.230526	0.822061	1.43225	0.161054	0.785242
MIMAT0027906	mmu-miR-7002-5p	miRNA	0.229505	1.27764	0.915066	0.366498	0.889235
MIMAT0004931	mmu-miR-466d-3p	miRNA	0.228617	0.750121	1.27782	0.209829	0.823771
MIMAT0028136	mmu-miR-7119-3p	miRNA	0.226878	1.24796	0.363829	0.718202	0.973722
MIMAT0004642	mmu-miR-330-5p	miRNA	0.226305	0.317699	1.79723	0.0810418	0.698705
MIMAT0025080	mmu-miR-6337	miRNA	0.226261	1.2669	1.0098	0.319607	0.86553
MIMAT0014906	mmu-miR-3092-3p	miRNA	0.226259	0.647534	1.23404	0.225512	0.829852
MIMAT0027779	mmu-miR-6939-3p	miRNA	0.226196	0.460368	1.8255	0.0765766	0.691328
MIMAT0028000	mmu-miR-7048-5p	miRNA	0.226195	1.01675	0.574197	0.569553	0.953456
MIMAT0027900	mmu-miR-6999-5p	miRNA	0.225676	0.786894	0.639641	0.526623	0.942101
MIMAT0017210	mmu-miR-547-5p	miRNA	0.22493	0.39591	1.69506	0.0990574	0.715293
MIMAT0004582	mmu-miR-106b-3p	miRNA	0.224715	5.1461	0.13199	0.895758	0.993175
MIMAT0027812	mmu-miR-6956-5p	miRNA	0.223669	0.938453	1.26105	0.215737	0.825795
MIMAT0027959	mmu-miR-7027-3p	miRNA	0.223371	0.41955	1.54352	0.131813	0.750061
MIMAT0019136	mmu-miR-1306-5p	miRNA	0.222353	0.824486	1.05879	0.297038	0.858711
MIMAT0028066	mmu-miR-7080-5p	miRNA	0.222082	0.710183	1.157	0.255207	0.833899
MIMAT0000131	mmu-miR-99a-5p	miRNA	0.221615	0.538734	1.59223	0.12044	0.750061
MIMAT0005833	mmu-miR-669d-5p	miRNA	0.221604	0.449851	1.50313	0.141888	0.754836
MIMAT0000234	mmu-miR-201-5p	miRNA	0.221481	0.571516	1.0002	0.324167	0.86553
MIMAT0027981	mmu-miR-7038-3p	miRNA	0.220894	0.468322	1.56972	0.125592	0.750061
MIMAT0005444	mmu-miR-218-2-3p	miRNA	0.220479	0.555359	1.85256	0.0725005	0.684807
MIMAT0029797	mmu-miR-7647-3p	miRNA	0.219665	0.3535	1.92901	0.0619742	0.648728
MIMAT0020627	mmu-miR-5119	miRNA	0.219479	0.798233	0.615133	0.542496	0.942698
MIMAT0027862	mmu-miR-6980-5p	miRNA	0.219424	1.4767	0.449347	0.655987	0.970893
MIMAT0014853	mmu-miR-3072-3p	miRNA	0.219144	0.739936	1.24033	0.223209	0.829852
MIMAT0014950	mmu-miR-3109-3p	miRNA	0.218917	0.648622	1.63664	0.11078	0.741646
MIMAT0000121	mmu-let-7g-5p	miRNA	0.217517	3.08266	0.210393	0.834596	0.99273
MIMAT0028430	mmu-miR-7231-5p	miRNA	0.216867	1.0021	0.580554	0.565307	0.953456
MIMAT0029872	mmu-miR-7679-5p	miRNA	0.215696	0.498673	1.72173	0.094058	0.710552
MIMAT0004520	mmu-let-7i-3p	miRNA	0.213711	0.635916	1.23176	0.226353	0.829852
MIMAT0007876	mmu-miR-1907	miRNA	0.212583	0.509005	1.70352	0.0974477	0.715293
MIMAT0029837	mmu-miR-7665-3p	miRNA	0.211622	0.508332	1.11407	0.272937	0.84237
MIMAT0027694	mmu-miR-6897-5p	miRNA	0.211309	0.528064	1.34394	0.187723	0.808522
MIMAT0027866	mmu-miR-6982-5p	miRNA	0.2111	0.932071	0.737669	0.465695	0.934125
MIMAT0017176	mmu-miR-448-5p	miRNA	0.210805	0.30008	1.80075	0.0804738	0.698705
MIMAT0027732	mmu-miR-6916-5p	miRNA	0.210801	0.454959	1.44291	0.158048	0.781886
MIMAT0028396	mmu-miR-7214-5p	miRNA	0.208187	0.39571	2.06316	0.0466734	0.603433
MIMAT0014864	mmu-miR-3078-5p	miRNA	0.208166	0.721028	1.26246	0.215235	0.825795
MIMAT0027339	mmu-miR-6481	miRNA	0.207913	0.307715	1.98133	0.0555547	0.638482
MIMAT0004891	mmu-miR-509-3p	miRNA	0.207751	0.410501	1.5661	0.126437	0.750061
MIMAT0027880	mmu-miR-6989-5p	miRNA	0.205564	0.840624	0.870925	0.389804	0.909226
MIMAT0025102	mmu-miR-6359	miRNA	0.204648	0.525041	1.67999	0.101978	0.723323
MIMAT0000380	mmu-miR-302a-3p	miRNA	0.202338	0.542649	1.29358	0.20439	0.821897
MIMAT0011212	mmu-miR-2136	miRNA	0.201975	0.543888	1.48733	0.145995	0.765268
MIMAT0027692	mmu-miR-6896-5p	miRNA	0.201636	0.807861	0.683153	0.499064	0.934125
MIMAT0029891	mmu-miR-7684-3p	miRNA	0.201253	1.12524	0.56234	0.577514	0.959005
MIMAT0000381	mmu-miR-34c-5p	miRNA	0.199757	0.520728	1.52203	0.1371	0.750234
MIMAT0028451	mmu-miR-7241-3p	miRNA	0.199138	0.54626	1.54978	0.130305	0.750061
MIMAT0028393	mmu-miR-7212-3p	miRNA	0.198607	0.485736	1.6311	0.111951	0.742144
MIMAT0027872	mmu-miR-6985-5p	miRNA	0.196654	0.747281	0.966383	0.340566	0.874951
MIMAT0009459	mmu-miR-1982-5p	miRNA	0.196408	0.737289	0.908912	0.369691	0.889235
MIMAT0017024	mmu-miR-103-1-5p	miRNA	0.196286	0.233415	1.18563	0.243857	0.833899
MIMAT0004541	mmu-miR-188-3p	miRNA	0.19548	0.569206	1.30389	0.200889	0.821897
MIMAT0003482	mmu-miR-499-5p	miRNA	0.195411	0.468849	1.33225	0.191497	0.817395
MIMAT0027749	mmu-miR-6924-3p	miRNA	0.195092	0.641879	0.909825	0.369216	0.889235
MIMAT0017046	mmu-miR-101b-5p	miRNA	0.194905	0.411199	1.54595	0.131226	0.750061
MIMAT0029867	mmu-miR-1191b-3p	miRNA	0.193214	0.374287	1.59063	0.120798	0.750061
MIMAT0009446	mmu-miR-1971	miRNA	0.193208	0.743285	0.913806	0.36715	0.889235
MIMAT0020640	mmu-miR-5129-5p	miRNA	0.192058	0.42916	1.4234	0.163584	0.785242
MIMAT0017324	mmu-miR-669d-3p	miRNA	0.191581	0.677504	0.994795	0.32675	0.86553
MIMAT0027870	mmu-miR-6984-5p	miRNA	0.190054	0.862579	0.776122	0.442956	0.931819
MIMAT0020646	mmu-miR-5135	miRNA	0.18807	1.48376	0.421841	0.675753	0.973722
MIMAT0009419	mmu-miR-669m-3p	miRNA	0.187794	0.510452	1.25329	0.218513	0.825795
MIMAT0014919	mmu-miR-3100-5p	miRNA	0.18547	0.505199	1.09805	0.279773	0.850011
MIMAT0027928	mmu-miR-7012-5p	miRNA	0.185088	1.30269	0.708862	0.483164	0.934125
MIMAT0027829	mmu-miR-6964-3p	miRNA	0.184761	0.464704	1.66603	0.104747	0.732081
MIMAT0022386	mmu-miR-5627-3p	miRNA	0.183859	0.259355	1.53524	0.133829	0.750061
MIMAT0000669	mmu-miR-221-3p	miRNA	0.183791	2.95414	0.16441	0.870366	0.993175
MIMAT0004930	mmu-miR-466d-5p	miRNA	0.18372	0.449458	1.45689	0.154173	0.780676
MIMAT0028004	mmu-miR-7050-5p	miRNA	0.183699	0.759315	1.02061	0.31453	0.86553
MIMAT0027941	mmu-miR-7018-3p	miRNA	0.183037	0.509229	0.916296	0.365861	0.889235
MIMAT0003898	mmu-miR-760-3p	miRNA	0.182981	0.564501	1.21084	0.23417	0.833899
MIMAT0025582	mmu-miR-6537-3p	miRNA	0.182349	0.373165	1.43199	0.161128	0.785242
MIMAT0025107	mmu-miR-6363	miRNA	0.181686	0.421443	1.31247	0.198012	0.81931
MIMAT0003450	mmu-miR-488-3p	miRNA	0.181396	0.43983	1.61486	0.115435	0.750061
MIMAT0011215	mmu-miR-2139	miRNA	0.181237	0.434757	1.53294	0.134395	0.750061
MIMAT0031417	mmu-miR-8111	miRNA	0.180473	0.485204	1.42982	0.161746	0.785242
MIMAT0027816	mmu-miR-6958-5p	miRNA	0.180001	0.578703	1.15501	0.256008	0.833899
MIMAT0029842	mmu-miR-7668-5p	miRNA	0.178872	0.290548	1.41353	0.166445	0.785242
MIMAT0027982	mmu-miR-7039-5p	miRNA	0.178327	0.56329	1.00738	0.320754	0.86553
MIMAT0020635	mmu-miR-5125	miRNA	0.178024	0.259962	1.55073	0.130075	0.750061
MIMAT0022361	mmu-miR-5617-5p	miRNA	0.177973	0.684719	0.935378	0.356084	0.885771
MIMAT0017281	mmu-miR-511-3p	miRNA	0.177421	0.601166	1.2204	0.230575	0.833899
MIMAT0028009	mmu-miR-7052-3p	miRNA	0.177088	0.411879	1.4916	0.144876	0.763599
MIMAT0027839	mmu-miR-6968-3p	miRNA	0.176094	0.573439	1.06193	0.295631	0.858546
MIMAT0017247	mmu-miR-497-3p	miRNA	0.174179	0.389508	1.79022	0.0821828	0.698705
MIMAT0009427	mmu-miR-669n	miRNA	0.17334	1.15557	0.615212	0.542445	0.942698
MIMAT0022360	mmu-miR-5616-3p	miRNA	0.173126	0.425446	1.25239	0.218837	0.825795
MIMAT0029860	mmu-miR-7676-5p	miRNA	0.172801	0.571032	1.05927	0.296824	0.858711
MIMAT0022704	mmu-miR-489-5p	miRNA	0.172078	0.380316	1.52655	0.135972	0.750234
MIMAT0028002	mmu-miR-7049-5p	miRNA	0.171501	0.595826	1.13576	0.263872	0.836278
MIMAT0005837	mmu-miR-1187	miRNA	0.171476	1.0075	0.532932	0.597491	0.965437
MIMAT0011287	mmu-miR-2183	miRNA	0.171164	0.497279	1.39395	0.172231	0.791858
MIMAT0004572	mmu-miR-290a-3p	miRNA	0.170932	0.541113	1.30222	0.201454	0.821897
MIMAT0017282	mmu-miR-544-5p	miRNA	0.17005	0.381499	1.02667	0.311708	0.86553
MIMAT0027701	mmu-miR-6900-3p	miRNA	0.168412	0.262442	1.27055	0.212375	0.82455
MIMAT0027740	mmu-miR-6920-5p	miRNA	0.168251	0.435015	1.28343	0.207882	0.821897
MIMAT0027809	mmu-miR-6954-3p	miRNA	0.167934	0.681318	1.12435	0.268613	0.837441
MIMAT0025093	mmu-miR-6350	miRNA	0.167798	0.630914	1.15647	0.255419	0.833899
MIMAT0025584	mmu-miR-6539	miRNA	0.167417	0.313945	1.32211	0.194817	0.81906
MIMAT0000519	mmu-miR-200a-3p	miRNA	0.167411	0.660558	0.989471	0.32931	0.86553
MIMAT0029903	mmu-miR-7687-3p	miRNA	0.165784	0.440531	1.28815	0.206252	0.821897
MIMAT0000593	mmu-miR-344-3p	miRNA	0.164933	0.428288	1.07457	0.290011	0.855502
MIMAT0031394	mmu-miR-8093	miRNA	0.164561	0.626798	0.619401	0.539714	0.942101
MIMAT0017343	mmu-miR-1947-3p	miRNA	0.164436	0.255894	1.27561	0.210602	0.82386
MIMAT0014823	mmu-miR-3057-3p	miRNA	0.164304	0.646614	1.0111	0.318993	0.86553
MIMAT0000584	mmu-miR-339-5p	miRNA	0.163458	1.01324	0.513949	0.610558	0.967856
MIMAT0000141	mmu-miR-130a-3p	miRNA	0.163238	0.474275	0.773707	0.444364	0.932725
MIMAT0027730	mmu-miR-6915-5p	miRNA	0.162657	0.530918	1.1767	0.247357	0.833899
MIMAT0017323	mmu-miR-669k-5p	miRNA	0.162517	0.416522	1.12901	0.266667	0.836278
MIMAT0017020	mmu-miR-26a-1-3p	miRNA	0.161774	0.697489	0.86256	0.394325	0.911619
MIMAT0029804	mmu-miR-7651-5p	miRNA	0.160499	0.45213	1.01588	0.316745	0.86553
MIMAT0003895	mmu-miR-764-3p	miRNA	0.160403	0.59101	1.00015	0.324189	0.86553
MIMAT0009404	mmu-miR-1940	miRNA	0.160211	0.448441	0.517529	0.608084	0.967856
MIMAT0014814	mmu-miR-3058-3p	miRNA	0.159763	0.920644	0.784381	0.43816	0.92684
MIMAT0028045	mmu-miR-7069-3p	miRNA	0.15959	0.558028	0.983785	0.332059	0.86553
MIMAT0000211	mmu-miR-182-5p	miRNA	0.159379	0.784396	1.01082	0.319127	0.86553
MIMAT0004881	mmu-miR-466f-5p	miRNA	0.15909	0.742684	0.629662	0.533057	0.942101
MIMAT0017002	mmu-miR-204-3p	miRNA	0.158122	0.731594	0.759963	0.45243	0.934125
MIMAT0031412	mmu-miR-8107	miRNA	0.158089	0.579183	0.734231	0.46776	0.934125
MIMAT0027968	mmu-miR-7032-5p	miRNA	0.15805	0.49811	1.39246	0.172678	0.791858
MIMAT0003471	mmu-miR-692	miRNA	0.157882	0.38303	0.998889	0.324791	0.86553
MIMAT0017174	mmu-miR-370-5p	miRNA	0.157539	0.421592	1.43409	0.160533	0.785242
MIMAT0025110	mmu-miR-6366	miRNA	0.157392	3.84953	0.125875	0.90056	0.993175
MIMAT0004577	mmu-miR-299a-3p	miRNA	0.157246	0.807833	0.90287	0.372845	0.889235
MIMAT0027843	mmu-miR-6970-3p	miRNA	0.157147	0.38257	1.15248	0.257032	0.833899
MIMAT0000588	mmu-miR-341-3p	miRNA	0.155037	0.543373	1.09856	0.279555	0.850011
MIMAT0005845	mmu-miR-466k	miRNA	0.154628	0.458519	1.19453	0.240404	0.833899
MIMAT0028424	mmu-miR-7228-5p	miRNA	0.154575	0.132565	1.17406	0.248398	0.833899
MIMAT0028017	mmu-miR-7056-3p	miRNA	0.153643	0.541995	1.10303	0.277636	0.846213
MIMAT0014872	mmu-miR-3082-5p	miRNA	0.152819	1.13066	0.515197	0.609695	0.967856
MIMAT0004886	mmu-miR-467d-5p	miRNA	0.151723	0.496333	1.02684	0.311628	0.86553
MIMAT0031425	mmu-miR-8119	miRNA	0.151461	0.921495	0.483184	0.632012	0.969356
MIMAT0025122	mmu-miR-6377	miRNA	0.151235	0.656992	1.1053	0.276666	0.844606
MIMAT0003514	mmu-miR-718	miRNA	0.150525	0.557844	0.953358	0.347029	0.87629
MIMAT0028084	mmu-miR-7089-5p	miRNA	0.150019	0.668467	1.23109	0.2266	0.829852
MIMAT0004529	mmu-miR-125b-2-3p	miRNA	0.149296	0.30521	1.29867	0.202657	0.821897
MIMAT0025587	mmu-miR-3473e	miRNA	0.148814	2.02584	0.192661	0.848352	0.99273
MIMAT0029803	mmu-miR-7650-3p	miRNA	0.148756	0.405048	1.03687	0.306998	0.86553
MIMAT0003733	mmu-miR-665-3p	miRNA	0.14848	0.448593	1.28818	0.206241	0.821897
MIMAT0000671	mmu-miR-224-5p	miRNA	0.148292	0.529572	1.21724	0.231759	0.833899
MIMAT0029815	mmu-miR-7654-3p	miRNA	0.148215	0.675574	0.789957	0.434939	0.92684
MIMAT0004644	mmu-miR-337-5p	miRNA	0.148079	0.447768	0.840935	0.406165	0.917495
MIMAT0029870	mmu-miR-7678-5p	miRNA	0.14721	0.707201	0.904757	0.371858	0.889235
MIMAT0025585	mmu-miR-6540-5p	miRNA	0.147151	0.706272	0.89351	0.377764	0.893152
MIMAT0000147	mmu-miR-135a-5p	miRNA	0.14705	0.280055	1.25788	0.216867	0.825795
MIMAT0003502	mmu-miR-712-5p	miRNA	0.14622	0.759361	0.906905	0.370737	0.889235
MIMAT0017261	mmu-miR-490-5p	miRNA	0.145943	0.401115	1.11063	0.274397	0.84237
MIMAT0003739	mmu-miR-673-5p	miRNA	0.145805	0.426217	1.16648	0.251408	0.833899
MIMAT0014810	mmu-miR-1298-3p	miRNA	0.145661	0.574557	0.547867	0.587304	0.961375
MIMAT0005830	mmu-miR-466l-3p	miRNA	0.145178	0.712605	0.819392	0.418178	0.920806
MIMAT0004635	mmu-miR-92a-2-5p	miRNA	0.145041	0.984004	0.368049	0.715081	0.973722
MIMAT0028421	mmu-miR-7226-3p	miRNA	0.144631	0.505096	1.1517	0.257347	0.833899
MIMAT0004883	mmu-miR-466g	miRNA	0.144179	0.134724	1.29446	0.204089	0.821897
MIMAT0031390	mmu-miR-3473f	miRNA	0.143331	0.310768	1.37801	0.177056	0.800528
MIMAT0025168	mmu-miR-6414	miRNA	0.143081	0.471734	1.01003	0.3195	0.86553
MIMAT0004847	mmu-miR-882	miRNA	0.143079	0.384276	1.244	0.221869	0.828349
MIMAT0017040	mmu-miR-350-5p	miRNA	0.141888	0.532453	1.13187	0.265483	0.836278
MIMAT0028081	mmu-miR-7087-3p	miRNA	0.14139	0.440942	1.155	0.256014	0.833899
MIMAT0009426	mmu-miR-1955-5p	miRNA	0.141377	0.681877	0.759754	0.452553	0.934125
MIMAT0005839	mmu-miR-669f-3p	miRNA	0.141237	0.562186	0.896618	0.376126	0.890382
MIMAT0016999	mmu-miR-194-1-3p	miRNA	0.140795	0.397376	1.40011	0.170394	0.788968
MIMAT0017262	mmu-miR-741-5p	miRNA	0.140438	0.659731	1.03912	0.305963	0.86553
MIMAT0029801	mmu-miR-7649-3p	miRNA	0.140421	0.318268	1.17955	0.246234	0.833899
MIMAT0020606	mmu-miR-5099	miRNA	0.140167	0.322973	0.848025	0.402259	0.917495
MIMAT0027939	mmu-miR-7017-3p	miRNA	0.139721	0.474572	0.92339	0.362206	0.889235
MIMAT0003166	mmu-miR-546	miRNA	0.139253	1.58793	0.27316	0.786356	0.982514
MIMAT0016992	mmu-miR-153-5p	miRNA	0.138746	0.783393	0.798258	0.430172	0.921546
MIMAT0017058	mmu-miR-26a-2-3p	miRNA	0.138353	0.35412	1.03804	0.306459	0.86553
MIMAT0014912	mmu-miR-3095-3p	miRNA	0.137849	0.262046	1.36939	0.179711	0.803985
MIMAT0012774	mmu-miR-664-3p	miRNA	0.137312	0.461499	0.898564	0.375102	0.890382
MIMAT0002109	mmu-miR-468-3p	miRNA	0.137158	0.54073	0.861017	0.395163	0.911619
MIMAT0017270	mmu-miR-18b-3p	miRNA	0.136071	0.580283	1.08128	0.287058	0.855502
MIMAT0004530	mmu-miR-127-5p	miRNA	0.135838	0.484359	1.08958	0.283435	0.852988
MIMAT0014916	mmu-miR-3097-3p	miRNA	0.135827	0.555073	1.16283	0.252865	0.833899
MIMAT0025147	mmu-miR-6396	miRNA	0.135632	0.714499	0.683943	0.498571	0.934125
MIMAT0004583	mmu-miR-130b-5p	miRNA	0.135486	0.41856	0.998609	0.324925	0.86553
MIMAT0009441	mmu-miR-1968-5p	miRNA	0.135094	0.673237	0.448776	0.656394	0.970893
MIMAT0027946	mmu-miR-7021-5p	miRNA	0.133175	0.327529	1.24786	0.220472	0.828128
MIMAT0028412	mmu-miR-7222-5p	miRNA	0.132481	0.430562	1.25733	0.217063	0.825795
MIMAT0027890	mmu-miR-6994-5p	miRNA	0.131087	0.975133	0.549764	0.586016	0.961375
MIMAT0017082	mmu-miR-383-3p	miRNA	0.130374	0.67951	0.866087	0.392415	0.910862
MIMAT0028131	mmu-miR-7117-5p	miRNA	0.129875	0.660423	0.786785	0.436769	0.92684
MIMAT0014838	mmu-miR-3066-5p	miRNA	0.129673	0.243398	1.56512	0.126666	0.750061
MIMAT0022375	mmu-miR-3073b-5p	miRNA	0.128885	0.221443	1.11013	0.274609	0.84237
MIMAT0025126	mmu-miR-6380	miRNA	0.128878	0.497803	1.09209	0.282348	0.852816
MIMAT0028087	mmu-miR-7090-3p	miRNA	0.127955	0.354257	0.919905	0.363998	0.889235
MIMAT0027865	mmu-miR-6981-3p	miRNA	0.127641	0.663822	0.834591	0.40968	0.918736
MIMAT0029793	mmu-miR-6546-3p	miRNA	0.127342	0.476902	0.776289	0.442858	0.931819
MIMAT0014946	mmu-miR-3074-2-3p	miRNA	0.127125	0.538579	0.903095	0.372727	0.889235
MIMAT0004890	mmu-miR-509-5p	miRNA	0.126399	0.0610089	1.14298	0.260904	0.835242
MIMAT0017050	mmu-miR-32-3p	miRNA	0.125563	0.413774	0.944586	0.351427	0.881108
MIMAT0029851	mmu-miR-7672-3p	miRNA	0.125423	0.566175	0.912488	0.367833	0.889235
MIMAT0028423	mmu-miR-7227-3p	miRNA	0.124533	0.508024	1.05485	0.298812	0.859929
MIMAT0003467	mmu-miR-688	miRNA	0.124233	0.477972	0.978706	0.334526	0.870773
MIMAT0014903	mmu-miR-3091-5p	miRNA	0.12421	1.38855	0.334794	0.739804	0.973813
MIMAT0004663	mmu-miR-200c-5p	miRNA	0.123675	0.443991	1.06729	0.293238	0.855502
MIMAT0027830	mmu-miR-6965-5p	miRNA	0.123329	0.868206	0.737267	0.465936	0.934125
MIMAT0027876	mmu-miR-6987-5p	miRNA	0.123027	1.29926	0.3619	0.71963	0.973722
MIMAT0027960	mmu-miR-7028-5p	miRNA	0.122199	0.728659	0.639581	0.526662	0.942101
MIMAT0028418	mmu-miR-7225-5p	miRNA	0.121975	0.429141	0.952078	0.347668	0.87629
MIMAT0017329	mmu-miR-1193-5p	miRNA	0.121678	0.649109	0.889086	0.380104	0.896462
MIMAT0027699	mmu-miR-6899-3p	miRNA	0.121616	0.336952	0.987409	0.330305	0.86553
MIMAT0017260	mmu-miR-652-5p	miRNA	0.121394	0.430599	0.662516	0.512035	0.937929
MIMAT0004576	mmu-miR-296-3p	miRNA	0.121321	0.591558	0.707296	0.484125	0.934125
MIMAT0017284	mmu-miR-653-3p	miRNA	0.120624	0.225508	1.2163	0.232111	0.833899
MIMAT0031426	mmu-miR-8120	miRNA	0.120481	0.581223	0.969792	0.338889	0.874951
MIMAT0031416	mmu-miR-8110	miRNA	0.119946	6.06537	0.0876852	0.930633	0.994577
MIMAT0004885	mmu-miR-467c-5p	miRNA	0.119909	0.408545	1.14406	0.260459	0.835242
MIMAT0001421	mmu-miR-434-5p	miRNA	0.119117	0.169364	0.89107	0.379053	0.895091
MIMAT0017070	mmu-miR-7a-2-3p	miRNA	0.119106	0.692991	0.692429	0.493295	0.934125
MIMAT0022362	mmu-miR-5617-3p	miRNA	0.118947	0.503629	0.814532	0.420918	0.920806
MIMAT0017016	mmu-let-7e-3p	miRNA	0.117389	0.4612	0.702111	0.487312	0.934125
MIMAT0005846	mmu-miR-467f	miRNA	0.116831	0.538372	0.921795	0.363026	0.889235
MIMAT0027787	mmu-miR-6943-3p	miRNA	0.116568	0.428117	0.996681	0.325846	0.86553
MIMAT0027993	mmu-miR-7044-3p	miRNA	0.116147	0.43085	0.802065	0.427996	0.921546
MIMAT0014955	mmu-miR-3112-5p	miRNA	0.115923	0.680457	0.785111	0.437738	0.92684
MIMAT0017032	mmu-miR-329-5p	miRNA	0.115179	0.820989	0.624859	0.536168	0.942101
MIMAT0004895	mmu-miR-590-5p	miRNA	0.114495	0.278529	0.958069	0.344682	0.87629
MIMAT0029877	mmu-miR-6715-3p	miRNA	0.113487	0.544102	0.754661	0.455564	0.934125
MIMAT0028447	mmu-miR-7239-3p	miRNA	0.113384	0.462997	0.762686	0.450825	0.934125
MIMAT0004578	mmu-miR-300-5p	miRNA	0.113192	0.385094	0.805942	0.425787	0.921546
MIMAT0004821	mmu-miR-671-3p	miRNA	0.113072	0.558992	0.851734	0.400225	0.914912
MIMAT0027710	mmu-miR-6905-5p	miRNA	0.112739	0.624739	0.787507	0.436353	0.92684
MIMAT0004875	mmu-miR-466b-5p	miRNA	0.112414	0.481413	1.01729	0.316085	0.86553
MIMAT0014885	mmu-miR-466o-5p	miRNA	0.112414	0.481413	1.01729	0.316085	0.86553
MIMAT0004882	mmu-miR-466f-3p	miRNA	0.112412	0.280644	0.733739	0.468056	0.934125
MIMAT0031413	mmu-miR-8108	miRNA	0.112241	0.803285	0.598531	0.553388	0.946964
MIMAT0020622	mmu-miR-5114	miRNA	0.111984	0.68653	0.643272	0.524293	0.941453
MIMAT0014940	mmu-miR-3104-3p	miRNA	0.111521	0.448308	0.936227	0.355652	0.885771
MIMAT0028096	mmu-miR-7094b-2-5p	miRNA	0.110712	0.628282	0.779438	0.441027	0.930805
MIMAT0029798	mmu-miR-7648-5p	miRNA	0.11057	0.826687	0.659945	0.513663	0.937929
MIMAT0020605	mmu-miR-5098	miRNA	0.110452	0.415727	0.828304	0.413182	0.920806
MIMAT0028062	mmu-miR-7078-5p	miRNA	0.110422	0.556465	0.8336	0.410231	0.918736
MIMAT0025130	mmu-miR-6384	miRNA	0.110355	0.235169	1.09075	0.282931	0.852816
MIMAT0005831	mmu-miR-669k-3p	miRNA	0.109942	0.620195	0.698864	0.489314	0.934125
MIMAT0031411	mmu-miR-8106	miRNA	0.109916	0.541318	0.782735	0.439113	0.927827
MIMAT0014930	mmu-miR-344g-3p	miRNA	0.109766	1.76946	0.336682	0.738392	0.973813
MIMAT0029910	mmu-miR-7243-5p	miRNA	0.10925	0.550246	0.838905	0.407288	0.917495
MIMAT0028402	mmu-miR-7217-5p	miRNA	0.109213	0.665238	0.733672	0.468097	0.934125
MIMAT0025079	mmu-miR-6336	miRNA	0.108869	0.467723	0.685615	0.497529	0.934125
MIMAT0031407	mmu-miR-8103	miRNA	0.107807	0.667322	0.810047	0.423455	0.921269
MIMAT0029852	mmu-miR-7673-5p	miRNA	0.107614	0.473751	1.01083	0.319124	0.86553
MIMAT0004525	mmu-miR-99b-3p	miRNA	0.107064	0.437074	1.05952	0.296712	0.858711
MIMAT0004939	mmu-miR-208b-3p	miRNA	0.106625	0.450658	0.87358	0.388376	0.907004
MIMAT0028041	mmu-miR-6769b-3p	miRNA	0.10593	0.56694	0.491511	0.626172	0.969356
MIMAT0000520	mmu-miR-208a-3p	miRNA	0.105592	0.524765	0.811916	0.422397	0.920806
MIMAT0003490	mmu-miR-700-3p	miRNA	0.105566	1.598	0.203882	0.839642	0.99273
MIMAT0025086	mmu-miR-6343	miRNA	0.105366	0.535309	0.715537	0.479084	0.934125
MIMAT0027902	mmu-miR-7000-5p	miRNA	0.104502	0.431611	0.897237	0.3758	0.890382
MIMAT0004884	mmu-miR-466h-5p	miRNA	0.104449	0.574306	0.601101	0.551695	0.946964
MIMAT0027753	mmu-miR-6926-3p	miRNA	0.104283	0.201556	0.939034	0.35423	0.884648
MIMAT0027756	mmu-miR-6928-5p	miRNA	0.104222	0.485655	0.716806	0.47831	0.934125
MIMAT0005854	mmu-miR-467g	miRNA	0.10378	0.637907	0.696847	0.490559	0.934125
MIMAT0000143	mmu-miR-9-3p	miRNA	0.103171	0.647283	0.821188	0.417168	0.920806
MIMAT0017235	mmu-miR-758-5p	miRNA	0.103146	0.513043	0.833183	0.410462	0.918736
MIMAT0027932	mmu-miR-7014-5p	miRNA	0.102887	0.791305	0.487873	0.628721	0.969356
MIMAT0014958	mmu-miR-1912-3p	miRNA	0.102874	0.16218	0.965806	0.340851	0.874951
MIMAT0009436	mmu-miR-1963	miRNA	0.102665	0.63115	0.686552	0.496946	0.934125
MIMAT0022382	mmu-miR-5626-3p	miRNA	0.102663	0.450032	0.882794	0.383447	0.898792
MIMAT0003783	mmu-miR-615-3p	miRNA	0.102481	0.793641	0.688706	0.495606	0.934125
MIMAT0004892	mmu-miR-568	miRNA	0.102414	0.547082	0.845399	0.403703	0.917495
MIMAT0014891	mmu-miR-466p-5p	miRNA	0.102156	0.658869	0.728164	0.471418	0.934125
MIMAT0009455	mmu-miR-1983	miRNA	0.101079	0.0715298	0.994279	0.326997	0.86553
MIMAT0027860	mmu-miR-6979-5p	miRNA	0.10073	0.250823	0.739067	0.464856	0.934125
MIMAT0022374	mmu-miR-5623-3p	miRNA	0.10069	0.562319	0.852244	0.399946	0.914912
MIMAT0028388	mmu-miR-7210-5p	miRNA	0.10066	0.628713	0.692519	0.493239	0.934125
MIMAT0000674	mmu-miR-181c-5p	miRNA	0.100543	0.72329	0.68161	0.500028	0.934125
MIMAT0014937	mmu-miR-3103-5p	miRNA	0.0997932	0.530892	0.721428	0.475499	0.934125
MIMAT0014855	mmu-miR-3073a-3p	miRNA	0.0997086	0.446256	0.830964	0.411698	0.918736
MIMAT0014932	mmu-miR-344f-3p	miRNA	0.0987018	0.988114	0.510222	0.613139	0.967856
MIMAT0029876	mmu-miR-6715-5p	miRNA	0.0984893	0.591211	0.711386	0.481619	0.934125
MIMAT0029884	mmu-miR-7682-5p	miRNA	0.098333	0.656532	0.711293	0.481676	0.934125
MIMAT0027784	mmu-miR-6942-5p	miRNA	0.0981925	0.522526	0.730048	0.470281	0.934125
MIMAT0000212	mmu-miR-183-5p	miRNA	0.0974785	0.489938	0.667933	0.508612	0.937929
MIMAT0010560	mmu-miR-1249-3p	miRNA	0.0972692	0.858853	0.506114	0.61599	0.967856
MIMAT0022371	mmu-miR-5622-5p	miRNA	0.0967304	0.523257	0.702248	0.487228	0.934125
MIMAT0022363	mmu-miR-5618-5p	miRNA	0.0963101	0.422124	0.752013	0.457134	0.934125
MIMAT0027765	mmu-miR-6932-3p	miRNA	0.0950947	0.535807	0.598638	0.553318	0.946964
MIMAT0004839	mmu-miR-743b-5p	miRNA	0.0950414	0.491296	0.653869	0.517524	0.937929
MIMAT0029824	mmu-miR-7659-5p	miRNA	0.0946111	0.4367	0.838427	0.407552	0.917495
MIMAT0003504	mmu-miR-713	miRNA	0.0944449	0.264957	0.816129	0.420016	0.920806
MIMAT0027918	mmu-miR-7007-5p	miRNA	0.0942042	0.492836	0.707681	0.483888	0.934125
MIMAT0028027	mmu-miR-7061-3p	miRNA	0.0939442	0.580864	0.535881	0.595473	0.965304
MIMAT0027835	mmu-miR-6966-3p	miRNA	0.0938588	0.633694	0.649546	0.52028	0.939161
MIMAT0019344	mmu-miR-3964	miRNA	0.0934189	0.161971	0.637168	0.528214	0.942101
MIMAT0029882	mmu-miR-7681-5p	miRNA	0.0931873	0.449236	0.737387	0.465864	0.934125
MIMAT0014871	mmu-miR-3081-3p	miRNA	0.0921403	0.522984	0.690639	0.494405	0.934125
MIMAT0014956	mmu-miR-3112-3p	miRNA	0.0914799	0.334937	0.734685	0.467487	0.934125
MIMAT0025115	mmu-miR-6371	miRNA	0.09141	0.81538	0.502716	0.618353	0.967856
MIMAT0027881	mmu-miR-6989-3p	miRNA	0.0909826	0.41183	0.784806	0.437914	0.92684
MIMAT0004782	mmu-miR-483-5p	miRNA	0.0909506	0.564699	0.652943	0.518113	0.937929
MIMAT0014844	mmu-miR-3069-5p	miRNA	0.0902794	0.461488	0.840674	0.406309	0.917495
MIMAT0029802	mmu-miR-7650-5p	miRNA	0.0897248	0.28749	0.702362	0.487157	0.934125
MIMAT0014883	mmu-miR-466m-3p	miRNA	0.0895482	0.619781	0.587412	0.560745	0.949597
MIMAT0017231	mmu-miR-1224-3p	miRNA	0.089398	0.810466	0.448629	0.656499	0.970893
MIMAT0001422	mmu-miR-434-3p	miRNA	0.0893618	0.821496	0.420752	0.676541	0.973722
MIMAT0027707	mmu-miR-6903-3p	miRNA	0.0892722	0.606816	0.595605	0.55532	0.947475
MIMAT0000521	mmu-let-7a-5p	miRNA	0.0891221	5.40032	0.0548414	0.956581	0.994577
MIMAT0000233	mmu-miR-200b-3p	miRNA	0.0890701	0.693908	0.584023	0.562997	0.950619
MIMAT0027769	mmu-miR-6934-3p	miRNA	0.0879214	0.661656	0.354696	0.724973	0.973722
MIMAT0027747	mmu-miR-6923-3p	miRNA	0.087911	1.02133	0.240518	0.811349	0.984531
MIMAT0014877	mmu-miR-3084-3p	miRNA	0.0873586	0.314324	0.857501	0.397076	0.912795
MIMAT0020647	mmu-miR-5136	miRNA	0.0872075	0.501514	0.671947	0.506085	0.937929
MIMAT0027907	mmu-miR-7002-3p	miRNA	0.0870292	0.667165	0.489437	0.627624	0.969356
MIMAT0029838	mmu-miR-7666-5p	miRNA	0.0868249	0.298946	0.643463	0.524171	0.941453
MIMAT0029880	mmu-miR-465d-5p	miRNA	0.0867731	0.387045	0.805983	0.425764	0.921546
MIMAT0014831	mmu-miR-3062-3p	miRNA	0.0865248	0.200636	0.734244	0.467753	0.934125
MIMAT0027887	mmu-miR-6992-3p	miRNA	0.0863201	0.28005	0.747651	0.459728	0.934125
MIMAT0005849	mmu-miR-1191	miRNA	0.0847612	0.544012	0.568857	0.573131	0.957561
MIMAT0025174	mmu-miR-6418-3p	miRNA	0.0842967	0.313392	0.61969	0.539526	0.942101
MIMAT0001418	mmu-miR-431-5p	miRNA	0.0837196	0.54842	0.693176	0.492831	0.934125
MIMAT0003476	mmu-miR-669b-5p	miRNA	0.08357	0.63814	0.565573	0.575338	0.957892
MIMAT0000366	mmu-miR-290a-5p	miRNA	0.0835648	0.546438	0.546261	0.588395	0.961375
MIMAT0001081	mmu-miR-196b-5p	miRNA	0.0828064	0.292155	0.752085	0.457092	0.934125
MIMAT0028452	mmu-miR-7242-5p	miRNA	0.08265	0.429797	0.684137	0.49845	0.934125
MIMAT0029874	mmu-miR-7680-5p	miRNA	0.0818491	0.311284	0.75203	0.457124	0.934125
MIMAT0014835	mmu-miR-3064-3p	miRNA	0.081283	0.526542	0.521606	0.605271	0.967856
MIMAT0031408	mmu-miR-8104	miRNA	0.0804061	0.340109	0.666856	0.509292	0.937929
MIMAT0004870	mmu-miR-453	miRNA	0.0802676	0.411614	0.621397	0.538416	0.942101
MIMAT0004519	mmu-let-7g-3p	miRNA	0.0801507	0.530744	0.676032	0.503519	0.936383
MIMAT0003743	mmu-miR-712-3p	miRNA	0.0795911	0.600684	0.542106	0.591224	0.962427
MIMAT0003738	mmu-miR-496a-3p	miRNA	0.0793456	0.723951	0.392171	0.69734	0.973722
MIMAT0000597	mmu-miR-346-5p	miRNA	0.078948	0.71136	0.506673	0.615602	0.967856
MIMAT0027797	mmu-miR-6948-3p	miRNA	0.0788562	0.420916	0.600655	0.551988	0.946964
MIMAT0017344	mmu-miR-1948-5p	miRNA	0.0783739	0.26655	0.655765	0.516317	0.937929
MIMAT0005832	mmu-miR-669g	miRNA	0.0782798	0.507568	0.509483	0.613652	0.967856
MIMAT0027908	mmu-miR-6973b-5p	miRNA	0.078239	0.728191	0.362147	0.719447	0.973722
MIMAT0000659	mmu-miR-212-3p	miRNA	0.0775623	0.492439	0.443767	0.659977	0.970893
MIMAT0000123	mmu-miR-1a-3p	miRNA	0.077372	0.601234	0.620801	0.538803	0.942101
MIMAT0003464	mmu-miR-686	miRNA	0.0772081	0.904543	0.4063	0.687027	0.973722
MIMAT0005838	mmu-miR-669j	miRNA	0.076851	0.340619	0.513149	0.611112	0.967856
MIMAT0000548	mmu-miR-322-5p	miRNA	0.0767174	0.264961	0.841792	0.405691	0.917495
MIMAT0028434	mmu-miR-7233-5p	miRNA	0.0766385	0.298965	0.613527	0.543545	0.942804
MIMAT0025085	mmu-miR-6342	miRNA	0.0763726	0.309626	0.792662	0.433382	0.925973
MIMAT0000209	mmu-miR-129-5p	miRNA	0.0763115	0.690138	0.369712	0.713853	0.973722
MIMAT0029795	mmu-miR-7646-3p	miRNA	0.0761536	0.329141	0.548904	0.5866	0.961375
MIMAT0017255	mmu-miR-491-3p	miRNA	0.0756447	0.151284	0.787968	0.436087	0.92684
MIMAT0003128	mmu-miR-485-5p	miRNA	0.0755318	0.388769	0.481675	0.633073	0.969356
MIMAT0025164	mmu-miR-6411	miRNA	0.0741361	0.14669	0.885204	0.382164	0.898331
MIMAT0020628	mmu-miR-5120	miRNA	0.0740615	0.788286	0.40292	0.689488	0.973722
MIMAT0014815	mmu-miR-3099-5p	miRNA	0.0730975	0.408165	0.419856	0.677189	0.973722
MIMAT0004843	mmu-miR-879-3p	miRNA	0.072917	0.478023	0.652157	0.518614	0.937929
MIMAT0014800	mmu-miR-1247-5p	miRNA	0.0724612	0.366857	0.60118	0.551643	0.946964
MIMAT0019354	mmu-miR-28b	miRNA	0.0721659	0.307469	0.437716	0.664316	0.970893
MIMAT0027980	mmu-miR-7038-5p	miRNA	0.0720772	0.549348	0.473159	0.639074	0.969356
MIMAT0004649	mmu-miR-339-3p	miRNA	0.0711004	0.385446	0.345069	0.732134	0.973813
MIMAT0009396	mmu-miR-1933-5p	miRNA	0.0708918	0.566547	0.462626	0.646532	0.970004
MIMAT0000367	mmu-miR-291a-5p	miRNA	0.0704965	0.40514	0.522888	0.604388	0.967856
MIMAT0028410	mmu-miR-7221-5p	miRNA	0.0704656	0.159808	0.630876	0.532272	0.942101
MIMAT0000678	mmu-miR-7b-5p	miRNA	0.0703203	0.550295	0.4572	0.650388	0.970004
MIMAT0004573	mmu-miR-293-5p	miRNA	0.0701222	0.312811	0.661409	0.512736	0.937929
MIMAT0031391	mmu-miR-8090	miRNA	0.0699687	0.403008	0.61869	0.540177	0.942101
MIMAT0020614	mmu-miR-3473c	miRNA	0.0699206	0.540784	0.396243	0.694361	0.973722
MIMAT0028401	mmu-miR-7216-3p	miRNA	0.0696906	0.506106	0.450615	0.655082	0.970893
MIMAT0000612	mmu-miR-135b-5p	miRNA	0.0695343	0.300875	0.496945	0.622374	0.969356
MIMAT0028021	mmu-miR-7058-3p	miRNA	0.0693506	0.438946	0.542065	0.591252	0.962427
MIMAT0017353	mmu-miR-664-5p	miRNA	0.0692653	1.27932	0.197553	0.844552	0.99273
MIMAT0005855	mmu-miR-467h	miRNA	0.0688013	0.646289	0.412641	0.682418	0.973722
MIMAT0014868	mmu-miR-3080-5p	miRNA	0.0687789	0.556226	0.457728	0.650013	0.970004
MIMAT0000662	mmu-miR-216a-5p	miRNA	0.0686436	0.544686	0.486059	0.629993	0.969356
MIMAT0029855	mmu-miR-3569-3p	miRNA	0.0685601	0.403666	0.441344	0.661713	0.970893
MIMAT0027743	mmu-miR-6921-3p	miRNA	0.0685369	0.410238	0.664822	0.510576	0.937929
MIMAT0025099	mmu-miR-6356	miRNA	0.0679834	0.523479	0.397931	0.693128	0.973722
MIMAT0027916	mmu-miR-7006-5p	miRNA	0.0673741	0.514458	0.479779	0.634407	0.969356
MIMAT0004848	mmu-miR-883a-5p	miRNA	0.067203	0.56367	0.431401	0.668856	0.972151
MIMAT0003894	mmu-miR-764-5p	miRNA	0.0669769	0.524812	0.504995	0.616767	0.967856
MIMAT0028052	mmu-miR-7073-5p	miRNA	0.0667997	0.774828	0.349808	0.728605	0.973722
MIMAT0014806	mmu-miR-1843a-3p	miRNA	0.066445	0.567753	0.428794	0.670734	0.972151
MIMAT0017333	mmu-miR-1199-3p	miRNA	0.0661377	0.461589	0.333041	0.741115	0.973813
MIMAT0027852	mmu-miR-6975-5p	miRNA	0.0654352	0.571839	0.407337	0.686272	0.973722
MIMAT0014816	mmu-miR-3099-3p	miRNA	0.0651648	0.389254	0.549773	0.58601	0.961375
MIMAT0014803	mmu-miR-1264-3p	miRNA	0.064969	0.167658	0.621552	0.538315	0.942101
MIMAT0028036	mmu-miR-7066-5p	miRNA	0.0648132	0.591986	0.429199	0.670442	0.972151
MIMAT0029813	mmu-miR-7653-3p	miRNA	0.0644663	0.582185	0.317914	0.752463	0.980729
MIMAT0028414	mmu-miR-7223-5p	miRNA	0.0637131	0.302749	0.480457	0.63393	0.969356
MIMAT0017064	mmu-miR-135a-2-3p	miRNA	0.0625232	0.661215	0.349959	0.728493	0.973722
MIMAT0028019	mmu-miR-7057-3p	miRNA	0.0624585	0.333406	0.47841	0.635371	0.969356
MIMAT0004544	mmu-miR-193a-5p	miRNA	0.0624006	0.806793	0.364338	0.717825	0.973722
MIMAT0027729	mmu-miR-6914-3p	miRNA	0.06202	0.355396	0.52416	0.603513	0.967856
MIMAT0027783	mmu-miR-6941-3p	miRNA	0.062009	0.547174	0.468529	0.642348	0.96994
MIMAT0004632	mmu-miR-29c-5p	miRNA	0.0612531	0.446651	0.521272	0.605501	0.967856
MIMAT0004624	mmu-miR-15a-3p	miRNA	0.0611872	0.590785	0.456876	0.650619	0.970004
MIMAT0000661	mmu-miR-214-3p	miRNA	0.0610989	0.573169	0.341687	0.734655	0.973813
MIMAT0000122	mmu-let-7i-5p	miRNA	0.0607994	4.26217	0.0389629	0.969144	0.994577
MIMAT0014860	mmu-miR-3076-5p	miRNA	0.0604916	0.474213	0.393764	0.696174	0.973722
MIMAT0014911	mmu-miR-3095-5p	miRNA	0.0597426	0.404063	0.500852	0.61965	0.968957
MIMAT0000217	mmu-miR-188-5p	miRNA	0.0591593	0.12402	0.586224	0.561534	0.949829
MIMAT0028069	mmu-miR-7081-3p	miRNA	0.0578669	0.674338	0.387648	0.700653	0.973722
MIMAT0014880	mmu-miR-3086-5p	miRNA	0.05779	0.485647	0.41029	0.684126	0.973722
MIMAT0003470	mmu-miR-691	miRNA	0.0576878	0.410848	0.418873	0.677901	0.973722
MIMAT0017322	mmu-miR-466l-5p	miRNA	0.0575549	0.312404	0.471497	0.640249	0.969356
MIMAT0028064	mmu-miR-7079-5p	miRNA	0.0574408	0.581703	0.333806	0.740543	0.973813
MIMAT0025157	mmu-miR-6405	miRNA	0.0569649	0.267387	0.490653	0.626772	0.969356
MIMAT0017274	mmu-miR-466h-3p	miRNA	0.056878	0.438403	0.427401	0.671738	0.97244
MIMAT0027920	mmu-miR-7008-5p	miRNA	0.0564407	0.751896	0.358089	0.722455	0.973722
MIMAT0027823	mmu-miR-6961-3p	miRNA	0.0563414	0.229661	0.440769	0.662125	0.970893
MIMAT0014894	mmu-miR-466n-3p	miRNA	0.0562393	0.338939	0.460594	0.647975	0.970004
MIMAT0017069	mmu-miR-128-2-5p	miRNA	0.0562376	0.855701	0.268753	0.789717	0.983538
MIMAT0029816	mmu-miR-7655-5p	miRNA	0.0559512	0.413098	0.44453	0.659431	0.970893
MIMAT0007864	mmu-miR-1897-5p	miRNA	0.0559178	0.453641	0.467385	0.643158	0.96994
MIMAT0004617	mmu-miR-148a-5p	miRNA	0.0556152	0.498578	0.476716	0.636565	0.969356
MIMAT0019349	mmu-miR-101c	miRNA	0.0554405	0.45217	0.373298	0.711207	0.973722
MIMAT0003472	mmu-miR-693-5p	miRNA	0.0553516	0.545866	0.345506	0.731808	0.973813
MIMAT0027974	mmu-miR-7035-5p	miRNA	0.0543942	0.618882	0.27671	0.783651	0.982514
MIMAT0003512	mmu-miR-450b-3p	miRNA	0.0543851	0.512674	0.379973	0.70629	0.973722
MIMAT0025588	mmu-miR-6541	miRNA	0.0539857	0.25349	0.541436	0.591681	0.962427
MIMAT0027696	mmu-miR-6898-5p	miRNA	0.0537219	0.771101	0.260547	0.795988	0.984531
MIMAT0020608	mmu-miR-5101	miRNA	0.0535563	0.325453	0.390308	0.698704	0.973722
MIMAT0003493	mmu-miR-703	miRNA	0.0535551	0.580301	0.43214	0.668324	0.972151
MIMAT0029909	mmu-miR-7689-3p	miRNA	0.0534572	0.572325	0.348914	0.729271	0.973722
MIMAT0004534	mmu-miR-145a-3p	miRNA	0.0532325	0.516744	0.49879	0.621088	0.968957
MIMAT0014918	mmu-miR-3098-3p	miRNA	0.053189	0.559055	0.277967	0.782693	0.982514
MIMAT0028391	mmu-miR-7211-3p	miRNA	0.0529769	0.468013	0.440273	0.662481	0.970893
MIMAT0004575	mmu-miR-295-5p	miRNA	0.0527061	0.331177	0.459346	0.648862	0.970004
MIMAT0017078	mmu-miR-375-5p	miRNA	0.0523554	0.450839	0.442113	0.661162	0.970893
MIMAT0029805	mmu-miR-7651-3p	miRNA	0.0521584	0.798869	0.337688	0.737641	0.973813
MIMAT0022366	mmu-miR-5619-3p	miRNA	0.0519423	0.440598	0.334005	0.740394	0.973813
MIMAT0025089	mmu-miR-6346	miRNA	0.0513547	0.312736	0.389536	0.69927	0.973722
MIMAT0027831	mmu-miR-6965-3p	miRNA	0.0512685	0.324039	0.43745	0.664506	0.970893
MIMAT0014948	mmu-miR-3108-3p	miRNA	0.0510766	0.399868	0.462297	0.646766	0.970004
MIMAT0029895	mmu-miR-126b-3p	miRNA	0.0510516	0.597347	0.277313	0.783192	0.982514
MIMAT0000667	mmu-miR-33-5p	miRNA	0.0507387	0.351612	0.382858	0.70417	0.973722
MIMAT0027975	mmu-miR-7035-3p	miRNA	0.0505827	0.176684	0.460675	0.647918	0.970004
MIMAT0028071	mmu-miR-7082-3p	miRNA	0.0501915	0.817643	0.257268	0.798497	0.984531
MIMAT0003373	mmu-miR-302b-5p	miRNA	0.0495744	0.513991	0.371324	0.712663	0.973722
MIMAT0005295	mmu-miR-376c-5p	miRNA	0.049504	0.321135	0.437371	0.664563	0.970893
MIMAT0027867	mmu-miR-6982-3p	miRNA	0.0494402	0.332319	0.366586	0.716163	0.973722
MIMAT0016986	mmu-miR-137-5p	miRNA	0.0492547	0.271418	0.385688	0.702092	0.973722
MIMAT0005294	mmu-miR-467e-3p	miRNA	0.0491874	0.528888	0.364361	0.717809	0.973722
MIMAT0003511	mmu-miR-450b-5p	miRNA	0.0491539	0.47328	0.3034	0.763404	0.980729
MIMAT0004640	mmu-miR-325-3p	miRNA	0.0491173	0.555657	0.400572	0.691201	0.973722
MIMAT0014886	mmu-miR-466o-3p	miRNA	0.0489122	0.412524	0.35524	0.724568	0.973722
MIMAT0022952	mmu-miR-1966-3p	miRNA	0.0486257	0.420631	0.308042	0.759899	0.980729
MIMAT0004238	mmu-miR-743a-3p	miRNA	0.0484074	0.721232	0.258871	0.79727	0.984531
MIMAT0025179	mmu-miR-30f	miRNA	0.0483814	0.523173	0.449763	0.65569	0.970893
MIMAT0027978	mmu-miR-7037-5p	miRNA	0.0483479	0.732856	0.296237	0.768822	0.981212
MIMAT0027886	mmu-miR-6992-5p	miRNA	0.0478148	0.498488	0.344712	0.7324	0.973813
MIMAT0025077	mmu-miR-6335	miRNA	0.047789	0.040635	0.536551	0.595015	0.965304
MIMAT0000555	mmu-miR-324-5p	miRNA	0.0476753	1.27604	0.0862189	0.93179	0.994577
MIMAT0025176	mmu-miR-6420	miRNA	0.0475504	0.535915	0.300922	0.765277	0.980729
MIMAT0029825	mmu-miR-7659-3p	miRNA	0.0474858	0.581657	0.299075	0.766674	0.980729
MIMAT0014834	mmu-miR-3064-5p	miRNA	0.0474303	0.53902	0.232108	0.817823	0.987312
MIMAT0017079	mmu-miR-377-5p	miRNA	0.0473218	0.346851	0.395638	0.694804	0.973722
MIMAT0024862	mmu-miR-6241	miRNA	0.047139	0.680585	0.20223	0.840923	0.99273
MIMAT0004851	mmu-miR-883b-3p	miRNA	0.0469245	0.40218	0.298774	0.766901	0.980729
MIMAT0029869	mmu-miR-7677-3p	miRNA	0.0468155	0.919608	0.307562	0.760261	0.980729
MIMAT0017003	mmu-miR-205-3p	miRNA	0.046155	0.373694	0.314512	0.755023	0.980729
MIMAT0027995	mmu-miR-7045-3p	miRNA	0.0461421	1.98856	0.059628	0.952795	0.994577
MIMAT0017345	mmu-miR-669l-3p	miRNA	0.0456043	0.273932	0.412525	0.682502	0.973722
MIMAT0031399	mmu-miR-8097	miRNA	0.0452498	0.603904	0.312842	0.756281	0.980729
MIMAT0017009	mmu-miR-106a-3p	miRNA	0.0452206	0.55627	0.358233	0.722348	0.973722
MIMAT0004823	mmu-miR-666-3p	miRNA	0.0450219	0.262942	0.364586	0.717642	0.973722
MIMAT0014942	mmu-miR-3105-3p	miRNA	0.0446999	0.573554	0.311647	0.757181	0.980729
MIMAT0017172	mmu-miR-410-5p	miRNA	0.0443915	0.512286	0.412609	0.682441	0.973722
MIMAT0029906	mmu-miR-7688-5p	miRNA	0.0443569	1.00158	0.177406	0.860225	0.99273
MIMAT0014858	mmu-miR-3075-5p	miRNA	0.0432153	0.578717	0.285435	0.777015	0.982514
MIMAT0014829	mmu-miR-3061-3p	miRNA	0.0428011	0.331688	0.342801	0.733824	0.973813
MIMAT0022380	mmu-miR-5625-3p	miRNA	0.0426761	0.491813	0.271419	0.787683	0.982514
MIMAT0000708	mmu-miR-363-3p	miRNA	0.0426509	0.605448	0.281157	0.780266	0.982514
MIMAT0005438	mmu-miR-30c-2-3p	miRNA	0.0425136	0.541898	0.325678	0.746632	0.977269
MIMAT0025151	mmu-miR-6399	miRNA	0.0420282	0.241954	0.3756	0.70951	0.973722
MIMAT0017048	mmu-miR-107-5p	miRNA	0.0419977	0.172421	0.339052	0.736622	0.973813
MIMAT0025109	mmu-miR-6365	miRNA	0.0419726	0.49789	0.319474	0.75129	0.980729
MIMAT0000165	mmu-miR-155-5p	miRNA	0.0417982	0.563043	0.243117	0.809352	0.984531
MIMAT0000208	mmu-miR-10b-5p	miRNA	0.0416825	0.655305	0.258584	0.79749	0.984531
MIMAT0028054	mmu-miR-7074-5p	miRNA	0.0410609	0.717921	0.234452	0.816017	0.987312
MIMAT0000240	mmu-miR-207	miRNA	0.0410242	0.398294	0.260902	0.795717	0.984531
MIMAT0031427	mmu-miR-3473g	miRNA	0.0403962	1.23533	0.115185	0.908965	0.994577
MIMAT0027719	mmu-miR-6909-3p	miRNA	0.0400298	0.274763	0.350491	0.728097	0.973722
MIMAT0028439	mmu-miR-7235-3p	miRNA	0.0399435	0.637843	0.274353	0.785446	0.982514
MIMAT0029796	mmu-miR-7647-5p	miRNA	0.0393122	0.915907	0.217605	0.829017	0.99273
MIMAT0027781	mmu-miR-6940-3p	miRNA	0.0391975	0.605942	0.300269	0.76577	0.980729
MIMAT0014812	mmu-miR-3059-3p	miRNA	0.0388835	0.631995	0.320791	0.750301	0.98053
MIMAT0027697	mmu-miR-6898-3p	miRNA	0.0383634	0.39656	0.304833	0.762321	0.980729
MIMAT0004619	mmu-miR-200a-5p	miRNA	0.0383576	0.521871	0.222819	0.824988	0.989363
MIMAT0004670	mmu-miR-7a-1-3p	miRNA	0.0382687	0.414706	0.242378	0.80992	0.984531
MIMAT0031400	mmu-miR-8098	miRNA	0.0382113	0.336729	0.406103	0.68717	0.973722
MIMAT0005447	mmu-miR-449b	miRNA	0.0380789	0.42574	0.285711	0.776805	0.982514
MIMAT0027857	mmu-miR-6977-3p	miRNA	0.0380765	0.407779	0.315135	0.754554	0.980729
MIMAT0025158	mmu-miR-496b	miRNA	0.0378219	0.35823	0.315047	0.75462	0.980729
MIMAT0017257	mmu-miR-701-3p	miRNA	0.0375349	0.472791	0.287906	0.775138	0.982514
MIMAT0017179	mmu-miR-365-2-5p	miRNA	0.0369912	0.437055	0.212667	0.832836	0.99273
MIMAT0017244	mmu-miR-496a-5p	miRNA	0.0369878	0.333469	0.350982	0.727733	0.973722
MIMAT0028015	mmu-miR-7055-3p	miRNA	0.0367582	0.446119	0.203227	0.84015	0.99273
MIMAT0027744	mmu-miR-6922-5p	miRNA	0.0362012	0.881006	0.167845	0.867684	0.99273
MIMAT0014850	mmu-miR-3071-5p	miRNA	0.0355936	0.390464	0.271918	0.787303	0.982514
MIMAT0014909	mmu-miR-3094-5p	miRNA	0.0354604	0.5836	0.278784	0.782072	0.982514
MIMAT0017208	mmu-miR-539-3p	miRNA	0.0353293	0.439526	0.279022	0.781891	0.982514
MIMAT0009400	mmu-miR-1936	miRNA	0.0351283	0.801578	0.180959	0.857457	0.99273
MIMAT0017061	mmu-miR-222-5p	miRNA	0.0350154	0.518683	0.298997	0.766733	0.980729
MIMAT0014931	mmu-miR-344f-5p	miRNA	0.0344324	0.420374	0.296885	0.768331	0.981212
MIMAT0017340	mmu-miR-1930-3p	miRNA	0.0339802	0.538521	0.261394	0.79534	0.984531
MIMAT0017081	mmu-miR-381-5p	miRNA	0.0339512	0.617068	0.243331	0.809187	0.984531
MIMAT0014808	mmu-miR-344d-3p	miRNA	0.033622	0.422202	0.281687	0.779863	0.982514
MIMAT0016982	mmu-miR-128-1-5p	miRNA	0.0335896	0.417305	0.293263	0.771075	0.982514
MIMAT0004855	mmu-miR-876-3p	miRNA	0.0334508	0.438825	0.303334	0.763454	0.980729
MIMAT0007872	mmu-miR-1906	miRNA	0.0331587	0.654063	0.205256	0.838576	0.99273
MIMAT0029904	mmu-miR-1258-5p	miRNA	0.0323875	0.723688	0.247625	0.80589	0.984531
MIMAT0017254	mmu-miR-499-3p	miRNA	0.0321323	0.441566	0.261729	0.795084	0.984531
MIMAT0000370	mmu-miR-292-3p	miRNA	0.0319085	0.6498	0.1941	0.847234	0.99273
MIMAT0005851	mmu-miR-1193-3p	miRNA	0.031719	0.575687	0.227431	0.821429	0.987695
MIMAT0004542	mmu-miR-191-3p	miRNA	0.0315476	0.249844	0.288477	0.774705	0.982514
MIMAT0027948	mmu-miR-7022-5p	miRNA	0.0308966	0.488923	0.232885	0.817225	0.987312
MIMAT0009424	mmu-miR-1953	miRNA	0.0304423	0.652028	0.192746	0.848286	0.99273
MIMAT0022359	mmu-miR-5616-5p	miRNA	0.0300909	0.399659	0.231745	0.818103	0.987312
MIMAT0003890	mmu-miR-551b-3p	miRNA	0.0298933	0.291536	0.205652	0.838269	0.99273
MIMAT0014876	mmu-miR-3084-5p	miRNA	0.0296766	0.60085	0.173025	0.863641	0.99273
MIMAT0000125	mmu-miR-23b-3p	miRNA	0.0294357	1.91138	0.0408904	0.967619	0.994577
MIMAT0027854	mmu-miR-6976-5p	miRNA	0.0293305	0.438596	0.308389	0.759637	0.980729
MIMAT0003485	mmu-miR-455-5p	miRNA	0.0288911	0.221638	0.280959	0.780417	0.982514
MIMAT0000150	mmu-miR-138-5p	miRNA	0.0286725	0.12098	0.266956	0.791089	0.983962
MIMAT0025092	mmu-miR-6349	miRNA	0.0282622	0.769564	0.0764367	0.939512	0.994577
MIMAT0004189	mmu-miR-693-3p	miRNA	0.0281821	0.344695	0.228721	0.820434	0.987695
MIMAT0027785	mmu-miR-6942-3p	miRNA	0.0277277	0.0617435	0.243229	0.809266	0.984531
MIMAT0027764	mmu-miR-6932-5p	miRNA	0.0276702	0.561564	0.220074	0.827109	0.991283
MIMAT0004528	mmu-miR-125a-3p	miRNA	0.0274319	0.266898	0.250392	0.803767	0.984531
MIMAT0009410	mmu-miR-1945	miRNA	0.0271551	0.794784	0.121805	0.903759	0.993874
MIMAT0028060	mmu-miR-7077-5p	miRNA	0.0270595	0.442203	0.143121	0.887026	0.993175
MIMAT0003734	mmu-miR-667-3p	miRNA	0.0266152	0.852809	0.136604	0.892137	0.993175
MIMAT0003387	mmu-miR-376a-5p	miRNA	0.0261645	0.670753	0.214878	0.831125	0.99273
MIMAT0005834	mmu-miR-466i-3p	miRNA	0.025526	0.267705	0.168831	0.866914	0.99273
MIMAT0025116	mmu-miR-6372	miRNA	0.0252629	0.38084	0.196334	0.845499	0.99273
MIMAT0000542	mmu-miR-34a-5p	miRNA	0.0250484	0.435646	0.191278	0.849427	0.99273
MIMAT0027951	mmu-miR-7023-3p	miRNA	0.0249094	0.396158	0.130943	0.89658	0.993175
MIMAT0005853	mmu-miR-669e-5p	miRNA	0.02478	0.709538	0.128929	0.898161	0.993175
MIMAT0028433	mmu-miR-7232-3p	miRNA	0.0245004	0.698481	0.167974	0.867583	0.99273
MIMAT0014960	mmu-miR-3113-3p	miRNA	0.0245001	0.43712	0.174952	0.862138	0.99273
MIMAT0027723	mmu-miR-6911-3p	miRNA	0.0243935	0.531346	0.178847	0.859102	0.99273
MIMAT0003893	mmu-miR-761	miRNA	0.0242589	0.480669	0.202559	0.840668	0.99273
MIMAT0004188	mmu-miR-802-5p	miRNA	0.0239564	0.304231	0.211477	0.833757	0.99273
MIMAT0027802	mmu-miR-6951-5p	miRNA	0.0239316	0.313585	0.249467	0.804476	0.984531
MIMAT0027715	mmu-miR-6907-3p	miRNA	0.0236187	0.463346	0.155724	0.877156	0.993175
MIMAT0017084	mmu-miR-181b-2-3p	miRNA	0.0232983	0.703407	0.127892	0.898976	0.993175
MIMAT0017077	mmu-miR-365-1-5p	miRNA	0.0232424	1.12512	0.0807529	0.936104	0.994577
MIMAT0001092	mmu-miR-376b-3p	miRNA	0.0231852	0.403389	0.19558	0.846084	0.99273
MIMAT0028007	mmu-miR-7051-3p	miRNA	0.0231465	0.353823	0.202735	0.840531	0.99273
MIMAT0004932	mmu-miR-878-5p	miRNA	0.0231405	0.460761	0.190759	0.84983	0.99273
MIMAT0017182	mmu-miR-450a-1-3p	miRNA	0.0229271	0.604742	0.194342	0.847046	0.99273
MIMAT0025154	mmu-miR-6402	miRNA	0.0227841	0.607352	0.131198	0.896379	0.993175
MIMAT0004581	mmu-miR-34b-3p	miRNA	0.022391	0.68224	0.145652	0.885042	0.993175
MIMAT0009457	mmu-miR-1839-3p	miRNA	0.0223346	0.316379	0.232159	0.817784	0.987312
MIMAT0017015	mmu-let-7a-2-3p	miRNA	0.0222952	0.375724	0.173021	0.863644	0.99273
MIMAT0017271	mmu-miR-193b-5p	miRNA	0.0218222	0.863988	0.0973634	0.923	0.994577
MIMAT0004888	mmu-miR-493-3p	miRNA	0.0211028	0.143788	0.212739	0.83278	0.99273
MIMAT0000158	mmu-miR-146a-5p	miRNA	0.0209026	0.164103	0.190641	0.849922	0.99273
MIMAT0029897	mmu-miR-7685-3p	miRNA	0.0205092	0.306243	0.17569	0.861563	0.99273
MIMAT0001533	mmu-miR-448-3p	miRNA	0.0204259	0.683034	0.150357	0.881357	0.993175
MIMAT0020630	mmu-miR-5122	miRNA	0.0203243	0.794996	0.0427881	0.966117	0.994577
MIMAT0003477	mmu-miR-669a-5p	miRNA	0.0203177	0.502939	0.154477	0.878132	0.993175
MIMAT0014889	mmu-miR-669p-5p	miRNA	0.0203177	0.502939	0.154477	0.878132	0.993175
MIMAT0000229	mmu-miR-199a-5p	miRNA	0.0201026	0.659036	0.125914	0.90053	0.993175
MIMAT0017214	mmu-miR-367-5p	miRNA	0.0199918	0.347249	0.190275	0.850207	0.99273
MIMAT0003181	mmu-miR-367-3p	miRNA	0.019892	0.268023	0.162485	0.87187	0.993175
MIMAT0028074	mmu-miR-7084-5p	miRNA	0.0197267	0.216714	0.173496	0.863273	0.99273
MIMAT0014873	mmu-miR-3082-3p	miRNA	0.0197039	0.250989	0.16708	0.868281	0.99273
MIMAT0028094	mmu-miR-7094-1-5p	miRNA	0.0191098	0.432283	0.146146	0.884655	0.993175
MIMAT0031396	mmu-miR-8095	miRNA	0.0187529	0.579967	0.13785	0.891159	0.993175
MIMAT0028426	mmu-miR-7229-5p	miRNA	0.0185008	0.654828	0.127357	0.899396	0.993175
MIMAT0024857	mmu-miR-6236	miRNA	0.0182705	0.605984	0.0938772	0.925749	0.994577
MIMAT0027794	mmu-miR-6947-5p	miRNA	0.0181418	0.426992	0.153597	0.878821	0.993175
MIMAT0022378	mmu-miR-5624-3p	miRNA	0.0181148	0.6856	0.130268	0.89711	0.993175
MIMAT0016994	mmu-miR-129-1-3p	miRNA	0.0179089	0.509034	0.118841	0.906089	0.994145
MIMAT0014897	mmu-miR-3088-5p	miRNA	0.0177712	0.406507	0.134125	0.894081	0.993175
MIMAT0005835	mmu-miR-1b-5p	miRNA	0.0174313	0.632848	0.13163	0.89604	0.993175
MIMAT0004524	mmu-miR-30b-3p	miRNA	0.0173677	0.635436	0.120656	0.904662	0.993908
MIMAT0014878	mmu-miR-3085-5p	miRNA	0.0173072	0.890833	0.0913997	0.927703	0.994577
MIMAT0029836	mmu-miR-7665-5p	miRNA	0.0170335	0.203766	0.110903	0.912335	0.994577
MIMAT0027895	mmu-miR-6996-3p	miRNA	0.0161263	0.387676	0.150865	0.880959	0.993175
MIMAT0004827	mmu-miR-297b-3p	miRNA	0.0161096	0.365309	0.134638	0.893679	0.993175
MIMAT0004864	mmu-miR-297a-3p	miRNA	0.0161096	0.365309	0.134638	0.893679	0.993175
MIMAT0004866	mmu-miR-297c-3p	miRNA	0.0161096	0.365309	0.134638	0.893679	0.993175
MIMAT0014947	mmu-miR-3108-5p	miRNA	0.0154762	0.5632	0.103672	0.918029	0.994577
MIMAT0029861	mmu-miR-7676-3p	miRNA	0.0152918	0.325841	0.125343	0.900979	0.993175
MIMAT0027711	mmu-miR-6905-3p	miRNA	0.0152125	0.526758	0.0919008	0.927307	0.994577
MIMAT0031424	mmu-miR-8118	miRNA	0.015102	0.524017	0.114247	0.909703	0.994577
MIMAT0027879	mmu-miR-6988-3p	miRNA	0.0148963	0.42323	0.132499	0.895358	0.993175
MIMAT0028406	mmu-miR-7219-5p	miRNA	0.0144074	0.475747	0.128539	0.898467	0.993175
MIMAT0000747	mmu-miR-382-5p	miRNA	0.0142556	0.481712	0.0905806	0.928349	0.994577
MIMAT0027977	mmu-miR-7036-3p	miRNA	0.0137472	0.54024	0.0988376	0.921838	0.994577
MIMAT0027807	mmu-miR-6953-3p	miRNA	0.0135666	0.667146	0.098776	0.921887	0.994577
MIMAT0017062	mmu-miR-224-3p	miRNA	0.0133999	0.41187	0.123289	0.902593	0.993175
MIMAT0027877	mmu-miR-6987-3p	miRNA	0.0132728	0.573152	0.0891386	0.929486	0.994577
MIMAT0017053	mmu-miR-212-5p	miRNA	0.0131337	0.36189	0.0731606	0.9421	0.994577
MIMAT0027929	mmu-miR-7012-3p	miRNA	0.0130767	0.444282	0.128964	0.898134	0.993175
MIMAT0027936	mmu-miR-7016-5p	miRNA	0.0130665	1.07294	0.0239045	0.981066	0.99622
MIMAT0028018	mmu-miR-7057-5p	miRNA	0.0128846	0.0275254	0.117284	0.907314	0.994345
MIMAT0003460	mmu-miR-449c-5p	miRNA	0.0122459	0.444635	0.08814	0.930274	0.994577
MIMAT0017007	mmu-miR-298-3p	miRNA	0.012019	0.242688	0.0909238	0.928078	0.994577
MIMAT0000153	mmu-miR-141-3p	miRNA	0.0118931	0.506863	0.0910268	0.927997	0.994577
MIMAT0020637	mmu-miR-5126	miRNA	0.0116707	10.5312	0.0214775	0.982988	0.99622
MIMAT0027738	mmu-miR-6919-5p	miRNA	0.0115985	0.340301	0.0842148	0.933372	0.994577
MIMAT0027766	mmu-miR-6933-5p	miRNA	0.0114713	0.554624	0.0687471	0.945587	0.994577
MIMAT0027716	mmu-miR-6908-5p	miRNA	0.0112584	0.962293	0.0577065	0.954315	0.994577
MIMAT0022986	mmu-miR-3572-5p	miRNA	0.0109439	1.11017	0.0374447	0.970346	0.994577
MIMAT0004622	mmu-let-7c-1-3p	miRNA	0.0108941	0.238446	0.10767	0.91488	0.994577
MIMAT0000220	mmu-miR-190a-5p	miRNA	0.0105798	0.372151	0.0948272	0.925	0.994577
MIMAT0027824	mmu-miR-6962-5p	miRNA	0.0102469	0.575456	0.0652563	0.948346	0.994577
MIMAT0031392	mmu-miR-8091	miRNA	0.0101765	0.668966	0.0593163	0.953042	0.994577
MIMAT0025177	mmu-miR-873b	miRNA	0.00999597	0.136668	0.0809711	0.935932	0.994577
MIMAT0028443	mmu-miR-7237-3p	miRNA	0.00974526	0.403341	0.0753212	0.940393	0.994577
MIMAT0017013	mmu-miR-196a-1-3p	miRNA	0.00967084	0.145622	0.073656	0.941709	0.994577
MIMAT0009397	mmu-miR-1933-3p	miRNA	0.00962277	0.159909	0.0995761	0.921256	0.994577
MIMAT0017215	mmu-miR-494-5p	miRNA	0.00943802	0.0940148	0.0825972	0.934648	0.994577
MIMAT0014928	mmu-miR-344c-3p	miRNA	0.00920527	0.678824	0.0546697	0.956716	0.994577
MIMAT0002104	mmu-miR-463-5p	miRNA	0.00914678	0.574468	0.0486682	0.961464	0.994577
MIMAT0000544	mmu-miR-129-2-3p	miRNA	0.00899095	0.580245	0.055904	0.95574	0.994577
MIMAT0004651	mmu-miR-340-5p	miRNA	0.00871127	0.599944	0.0619217	0.950982	0.994577
MIMAT0028425	mmu-miR-7228-3p	miRNA	0.00852696	0.367633	0.054008	0.95724	0.994577
MIMAT0027896	mmu-miR-6997-5p	miRNA	0.00832513	0.486565	0.0521366	0.95872	0.994577
MIMAT0027845	mmu-miR-6971-3p	miRNA	0.00815864	0.565528	0.0641177	0.949246	0.994577
MIMAT0004533	mmu-miR-141-5p	miRNA	0.00790868	0.526222	0.0558907	0.955751	0.994577
MIMAT0000148	mmu-miR-136-5p	miRNA	0.00787173	0.57213	0.0599275	0.952559	0.994577
MIMAT0029833	mmu-miR-7663-3p	miRNA	0.00752986	0.414928	0.0582806	0.953861	0.994577
MIMAT0029885	mmu-miR-7682-3p	miRNA	0.00742667	0.675026	0.0258037	0.979562	0.99622
MIMAT0027979	mmu-miR-7037-3p	miRNA	0.00653833	0.522789	0.0455465	0.963934	0.994577
MIMAT0003374	mmu-miR-302b-3p	miRNA	0.0063779	0.297034	0.0627722	0.95031	0.994577
MIMAT0027863	mmu-miR-6980-3p	miRNA	0.00621388	0.316718	0.0499362	0.960461	0.994577
MIMAT0027957	mmu-miR-7026-3p	miRNA	0.00617542	0.520849	0.0440113	0.965149	0.994577
MIMAT0000239	mmu-miR-206-3p	miRNA	0.0060696	0.243066	0.0508149	0.959766	0.994577
MIMAT0017263	mmu-miR-743a-5p	miRNA	0.00601061	0.599724	0.0434329	0.965606	0.994577
MIMAT0009442	mmu-miR-1969	miRNA	0.00590641	0.301978	0.045968	0.9636	0.994577
MIMAT0016995	mmu-miR-182-3p	miRNA	0.00576525	0.479221	0.0435969	0.965477	0.994577
MIMAT0027695	mmu-miR-6897-3p	miRNA	0.00566649	0.436323	0.0342341	0.972887	0.994577
MIMAT0004668	mmu-miR-138-1-3p	miRNA	0.00539446	0.713306	0.0350651	0.97223	0.994577
MIMAT0017233	mmu-miR-216b-3p	miRNA	0.00537092	0.361799	0.0327946	0.974027	0.994577
MIMAT0014846	mmu-miR-3070a-5p	miRNA	0.00478374	0.549374	0.0350432	0.972247	0.994577
MIMAT0014848	mmu-miR-3070b-5p	miRNA	0.00478374	0.549374	0.0350432	0.972247	0.994577
MIMAT0014920	mmu-miR-3100-3p	miRNA	0.00470506	0.445761	0.0319369	0.974706	0.994577
MIMAT0029819	mmu-miR-7656-3p	miRNA	0.00451379	0.585221	0.0330351	0.973837	0.994577
MIMAT0028437	mmu-miR-7234-3p	miRNA	0.00438811	0.177045	0.0359787	0.971506	0.994577
MIMAT0025125	mmu-miR-6379	miRNA	0.00427691	0.666155	0.0308339	0.975579	0.994872
MIMAT0004704	mmu-miR-335-3p	miRNA	0.00412645	0.344894	0.0318576	0.974769	0.994577
MIMAT0025121	mmu-miR-21b	miRNA	0.00326429	0.323919	0.0244475	0.980636	0.99622
MIMAT0014867	mmu-miR-3079-3p	miRNA	0.00296145	0.426444	0.024803	0.980355	0.99622
MIMAT0028427	mmu-miR-7229-3p	miRNA	0.00282171	0.246358	0.0247114	0.980427	0.99622
MIMAT0004666	mmu-miR-33-3p	miRNA	0.00276046	0.387335	0.0167289	0.986749	0.99622
MIMAT0028058	mmu-miR-7076-5p	miRNA	0.00272115	0.88431	0.0116548	0.990768	0.99622
MIMAT0005848	mmu-miR-466j	miRNA	0.00270309	0.735719	0.0123513	0.990216	0.99622
MIMAT0029857	mmu-miR-7674-3p	miRNA	0.00244865	0.571868	0.0161746	0.987188	0.99622
MIMAT0029808	mmu-miR-7036b-5p	miRNA	0.00244133	0.165793	0.0166595	0.986804	0.99622
MIMAT0017209	mmu-miR-541-3p	miRNA	0.00237021	0.237288	0.0191971	0.984794	0.99622
MIMAT0016991	mmu-miR-152-5p	miRNA	0.00215638	0.396779	0.0178866	0.985832	0.99622
MIMAT0014898	mmu-miR-3088-3p	miRNA	0.0019429	0.217413	0.0196305	0.984451	0.99622
MIMAT0022836	mmu-miR-299b-5p	miRNA	0.00183228	0.449488	0.0123696	0.990202	0.99622
MIMAT0027847	mmu-miR-6972-3p	miRNA	0.00163108	0.136568	0.0132304	0.98952	0.99622
MIMAT0003456	mmu-miR-495-3p	miRNA	0.00152656	0.195714	0.0120603	0.990447	0.99622
MIMAT0028415	mmu-miR-7223-3p	miRNA	0.00147804	0.363959	0.0123267	0.990236	0.99622
MIMAT0025091	mmu-miR-6348	miRNA	0.000978364	0.378074	0.00753968	0.994028	0.996875
MIMAT0014830	mmu-miR-3062-5p	miRNA	0.000351864	0.423241	0.0029572	0.997658	0.999753
MIMAT0027763	mmu-miR-6931-3p	miRNA	0.000129409	0.459575	0.000913603	0.999276	0.999925
MIMAT0028407	mmu-miR-7219-3p	miRNA	2.51501e-05	0.213555	0.000218826	0.999827	0.999925
MIMAT0029814	mmu-miR-7654-5p	miRNA	-1.21946e-05	0.538219	-9.47492e-05	0.999925	0.999925
MIMAT0017010	mmu-miR-19b-2-5p	miRNA	-0.000282419	0.491831	-0.00200972	0.998408	0.999925
MIMAT0000769	mmu-miR-133b-3p	miRNA	-0.00105831	0.321388	-0.00724336	0.994262	0.996875
MIMAT0016984	mmu-miR-132-5p	miRNA	-0.00135681	0.423268	-0.0110118	0.991277	0.99622
MIMAT0003449	mmu-miR-488-5p	miRNA	-0.00139341	0.504629	-0.010077	0.992018	0.99622
MIMAT0029886	mmu-miR-7683-5p	miRNA	-0.00172073	0.349245	-0.00978258	0.992251	0.99622
MIMAT0031421	mmu-miR-8115	miRNA	-0.0017241	0.547909	-0.00981063	0.992229	0.99622
MIMAT0027814	mmu-miR-6957-5p	miRNA	-0.00178805	0.375636	-0.0130173	0.989689	0.99622
MIMAT0009415	mmu-miR-1948-3p	miRNA	-0.00212464	0.650733	-0.0148682	0.988223	0.99622
MIMAT0017250	mmu-miR-669b-3p	miRNA	-0.00215281	0.463266	-0.0171239	0.986436	0.99622
MIMAT0029911	mmu-miR-7243-3p	miRNA	-0.00261133	0.433603	-0.0222959	0.98234	0.99622
MIMAT0027834	mmu-miR-6966-5p	miRNA	-0.0031964	0.269208	-0.0146051	0.988431	0.99622
MIMAT0027905	mmu-miR-7001-3p	miRNA	-0.00394897	0.313708	-0.0348574	0.972394	0.994577
MIMAT0029820	mmu-miR-7657-5p	miRNA	-0.00441602	0.346871	-0.0403107	0.968077	0.994577
MIMAT0029843	mmu-miR-7668-3p	miRNA	-0.00507871	0.580899	-0.0241755	0.980852	0.99622
MIMAT0027930	mmu-miR-7013-5p	miRNA	-0.00525074	0.450057	-0.0415196	0.967121	0.994577
MIMAT0001076	mmu-miR-384-3p	miRNA	-0.00526548	0.0798911	-0.0369985	0.970699	0.994577
MIMAT0003494	mmu-miR-704	miRNA	-0.00545219	0.425149	-0.0408073	0.967684	0.994577
MIMAT0009439	mmu-miR-1966-5p	miRNA	-0.00568051	0.650593	-0.0406946	0.967774	0.994577
MIMAT0004753	mmu-miR-431-3p	miRNA	-0.00600134	0.455765	-0.0446499	0.964643	0.994577
MIMAT0009407	mmu-miR-1942	miRNA	-0.00605736	0.739002	-0.0352638	0.972072	0.994577
MIMAT0027801	mmu-miR-6950-3p	miRNA	-0.00649002	0.629489	-0.0386803	0.969368	0.994577
MIMAT0000247	mmu-miR-143-3p	miRNA	-0.00649156	0.324597	-0.0563901	0.955356	0.994577
MIMAT0004898	mmu-miR-654-3p	miRNA	-0.00659168	0.682747	-0.0399674	0.968349	0.994577
MIMAT0003896	mmu-miR-763	miRNA	-0.00661154	0.473035	-0.045787	0.963744	0.994577
MIMAT0027971	mmu-miR-7033-3p	miRNA	-0.00676907	0.33739	-0.0412812	0.967309	0.994577
MIMAT0014917	mmu-miR-3098-5p	miRNA	-0.00718751	0.194929	-0.0617839	0.951091	0.994577
MIMAT0019347	mmu-miR-3965	miRNA	-0.00739205	0.85005	-0.0391471	0.968998	0.994577
MIMAT0022354	mmu-miR-3544-3p	miRNA	-0.00775743	0.23226	-0.0581507	0.953963	0.994577
MIMAT0027864	mmu-miR-6981-5p	miRNA	-0.00796884	0.620592	-0.0413627	0.967245	0.994577
MIMAT0028028	mmu-miR-7062-5p	miRNA	-0.00801521	0.609363	-0.0451541	0.964244	0.994577
MIMAT0025160	mmu-miR-6407	miRNA	-0.00808294	0.437741	-0.0592645	0.953083	0.994577
MIMAT0029578	mmu-miR-7578	miRNA	-0.00905464	0.404328	-0.0616563	0.951192	0.994577
MIMAT0000549	mmu-miR-322-3p	miRNA	-0.00918987	0.510351	-0.0670072	0.946962	0.994577
MIMAT0028095	mmu-miR-7094-3p	miRNA	-0.00933503	0.641562	-0.0628529	0.950246	0.994577
MIMAT0029859	mmu-miR-7675-3p	miRNA	-0.0093851	0.429416	-0.0485348	0.961569	0.994577
MIMAT0025097	mmu-miR-6354	miRNA	-0.00968765	0.327597	-0.0842071	0.933378	0.994577
MIMAT0003465	mmu-miR-719	miRNA	-0.00990033	0.796703	-0.035377	0.971983	0.994577
MIMAT0027923	mmu-miR-7009-3p	miRNA	-0.00993972	0.545239	-0.054908	0.956528	0.994577
MIMAT0003730	mmu-miR-592-5p	miRNA	-0.00994825	0.200049	-0.0868833	0.931266	0.994577
MIMAT0025139	mmu-miR-6390	miRNA	-0.0100534	0.602964	-0.0759023	0.939934	0.994577
MIMAT0031415	mmu-miR-8109	miRNA	-0.0100751	0.495534	-0.0585911	0.953615	0.994577
MIMAT0027912	mmu-miR-7004-5p	miRNA	-0.0101031	0.567555	-0.0619361	0.950971	0.994577
MIMAT0014907	mmu-miR-3093-5p	miRNA	-0.0101936	0.49653	-0.0717056	0.94325	0.994577
MIMAT0004876	mmu-miR-466b-3p	miRNA	-0.0104921	0.119842	-0.0826479	0.934608	0.994577
MIMAT0004878	mmu-miR-466c-3p	miRNA	-0.0104921	0.119842	-0.0826479	0.934608	0.994577
MIMAT0014892	mmu-miR-466p-3p	miRNA	-0.0104921	0.119842	-0.0826479	0.934608	0.994577
MIMAT0027821	mmu-miR-6960-3p	miRNA	-0.0107826	0.614676	-0.0790234	0.93747	0.994577
MIMAT0004747	mmu-miR-411-5p	miRNA	-0.0108046	0.518062	-0.0787061	0.93772	0.994577
MIMAT0025098	mmu-miR-6355	miRNA	-0.011977	0.473249	-0.101569	0.919686	0.994577
MIMAT0029875	mmu-miR-7680-3p	miRNA	-0.0121508	0.322058	-0.101622	0.919644	0.994577
MIMAT0031410	mmu-miR-3535	miRNA	-0.0121825	2.25436	-0.0119038	0.990571	0.99622
MIMAT0028001	mmu-miR-7048-3p	miRNA	-0.0124081	0.439339	-0.11525	0.908914	0.994577
MIMAT0000372	mmu-miR-294-3p	miRNA	-0.0132593	0.149542	-0.123276	0.902603	0.993175
MIMAT0000546	mmu-miR-103-3p	miRNA	-0.0134994	6.45006	-0.00938656	0.992565	0.99622
MIMAT0014859	mmu-miR-3075-3p	miRNA	-0.0136942	0.677174	-0.0919563	0.927264	0.994577
MIMAT0027892	mmu-miR-6995-5p	miRNA	-0.0141001	0.578661	-0.0829324	0.934384	0.994577
MIMAT0004540	mmu-miR-186-3p	miRNA	-0.0141085	0.581992	-0.0793846	0.937185	0.994577
MIMAT0028013	mmu-miR-7054-3p	miRNA	-0.0141905	0.519652	-0.10535	0.916707	0.994577
MIMAT0020624	mmu-miR-5116	miRNA	-0.0146559	0.711958	-0.0775215	0.938656	0.994577
MIMAT0027702	mmu-miR-6901-5p	miRNA	-0.0147595	0.39863	-0.0979063	0.922572	0.994577
MIMAT0014899	mmu-miR-3089-5p	miRNA	-0.0148781	0.396799	-0.119778	0.905352	0.993908
MIMAT0015219	mmu-miR-3475-3p	miRNA	-0.0152652	0.266336	-0.120287	0.904952	0.993908
MIMAT0004647	mmu-miR-338-5p	miRNA	-0.0153992	0.266904	-0.132358	0.895469	0.993175
MIMAT0017249	mmu-miR-495-5p	miRNA	-0.0155905	0.100453	-0.102717	0.918781	0.994577
MIMAT0004539	mmu-miR-183-3p	miRNA	-0.0155909	0.519452	-0.114657	0.90938	0.994577
MIMAT0028091	mmu-miR-7092-3p	miRNA	-0.0157501	0.533626	-0.10454	0.917345	0.994577
MIMAT0025118	mmu-miR-6374	miRNA	-0.0159062	0.420122	-0.124704	0.901481	0.993175
MIMAT0025111	mmu-miR-6367	miRNA	-0.0162102	0.416082	-0.146305	0.884531	0.993175
MIMAT0004938	mmu-miR-875-3p	miRNA	-0.0164388	0.636069	-0.0913025	0.927779	0.994577
MIMAT0031393	mmu-miR-8092	miRNA	-0.0167751	0.422455	-0.127499	0.899284	0.993175
MIMAT0014811	mmu-miR-3059-5p	miRNA	-0.0168664	0.947982	-0.0784461	0.937926	0.994577
MIMAT0028051	mmu-miR-7072-3p	miRNA	-0.0170412	0.526219	-0.103988	0.91778	0.994577
MIMAT0027777	mmu-miR-6938-3p	miRNA	-0.0172634	0.471359	-0.127939	0.898939	0.993175
MIMAT0005443	mmu-miR-181a-2-3p	miRNA	-0.0179147	0.255953	-0.158997	0.874596	0.993175
MIMAT0028395	mmu-miR-7213-3p	miRNA	-0.0182436	0.485464	-0.111009	0.912251	0.994577
MIMAT0004186	mmu-miR-301b-3p	miRNA	-0.0185284	0.497961	-0.139648	0.889749	0.993175
MIMAT0029908	mmu-miR-7689-5p	miRNA	-0.0186239	0.384081	-0.134307	0.893939	0.993175
MIMAT0004850	mmu-miR-883b-5p	miRNA	-0.018909	0.656147	-0.137855	0.891155	0.993175
MIMAT0014843	mmu-miR-3068-3p	miRNA	-0.0189613	0.618008	-0.101597	0.919664	0.994577
MIMAT0003458	mmu-miR-681	miRNA	-0.0189879	0.471845	-0.18854	0.851556	0.99273
MIMAT0025172	mmu-miR-6417	miRNA	-0.0191656	0.400373	-0.170867	0.865324	0.99273
MIMAT0009422	mmu-miR-1951	miRNA	-0.0191897	0.494878	-0.148493	0.882817	0.993175
MIMAT0017278	mmu-miR-92b-5p	miRNA	-0.0192985	0.837725	-0.06804	0.946146	0.994577
MIMAT0022837	mmu-miR-299b-3p	miRNA	-0.0194359	0.283763	-0.161777	0.872423	0.993175
MIMAT0022376	mmu-miR-3073b-3p	miRNA	-0.0195233	0.43191	-0.168391	0.867257	0.99273
MIMAT0017073	mmu-miR-194-2-3p	miRNA	-0.0196104	0.541317	-0.124261	0.901829	0.993175
MIMAT0027817	mmu-miR-6958-3p	miRNA	-0.0196658	0.30066	-0.227165	0.821634	0.987695
MIMAT0000663	mmu-miR-218-5p	miRNA	-0.0197721	0.322565	-0.166456	0.868768	0.99273
MIMAT0028093	mmu-miR-7093-3p	miRNA	-0.0198144	0.275644	-0.195755	0.845949	0.99273
MIMAT0001420	mmu-miR-433-3p	miRNA	-0.0204485	0.71389	-0.124151	0.901915	0.993175
MIMAT0025152	mmu-miR-6400	miRNA	-0.020825	0.331392	-0.178949	0.859023	0.99273
MIMAT0014954	mmu-miR-374c-3p	miRNA	-0.0211528	0.552142	-0.165709	0.869351	0.99273
MIMAT0004522	mmu-miR-27b-5p	miRNA	-0.0211849	0.135894	-0.14504	0.885522	0.993175
MIMAT0028428	mmu-miR-7230-5p	miRNA	-0.0213425	0.203637	-0.165622	0.869419	0.99273
MIMAT0000235	mmu-miR-202-3p	miRNA	-0.0213695	0.513706	-0.183978	0.855106	0.99273
MIMAT0004790	mmu-miR-503-3p	miRNA	-0.0214385	0.509738	-0.153415	0.878963	0.993175
MIMAT0025156	mmu-miR-6404	miRNA	-0.0215921	0.437402	-0.169106	0.866699	0.99273
MIMAT0000616	mmu-miR-101b-3p	miRNA	-0.0217732	0.513776	-0.207786	0.836616	0.99273
MIMAT0014819	mmu-miR-344d-1-5p	miRNA	-0.0230579	0.57031	-0.146372	0.884479	0.993175
MIMAT0017238	mmu-miR-665-5p	miRNA	-0.0232051	0.564863	-0.159337	0.874331	0.993175
MIMAT0022384	mmu-miR-344h-3p	miRNA	-0.0232653	0.590488	-0.186849	0.852871	0.99273
MIMAT0025082	mmu-miR-6339	miRNA	-0.0232663	0.546337	-0.143352	0.886845	0.993175
MIMAT0025119	mmu-miR-6375	miRNA	-0.0234319	0.372481	-0.171021	0.865205	0.99273
MIMAT0028398	mmu-miR-7215-5p	miRNA	-0.0234924	0.408905	-0.17134	0.864956	0.99273
MIMAT0027846	mmu-miR-6972-5p	miRNA	-0.0235952	0.976037	-0.124651	0.901522	0.993175
MIMAT0027919	mmu-miR-7007-3p	miRNA	-0.0238184	0.259931	-0.191656	0.849133	0.99273
MIMAT0000164	mmu-miR-154-5p	miRNA	-0.0240726	0.405358	-0.211166	0.833998	0.99273
MIMAT0028135	mmu-miR-7119-5p	miRNA	-0.0240856	0.735327	-0.132019	0.895735	0.993175
MIMAT0017025	mmu-miR-103-2-5p	miRNA	-0.0242001	0.587178	-0.169111	0.866695	0.99273
MIMAT0004820	mmu-miR-744-3p	miRNA	-0.0242439	0.440677	-0.168563	0.867123	0.99273
MIMAT0014896	mmu-miR-3087-3p	miRNA	-0.0243792	0.664112	-0.168801	0.866937	0.99273
MIMAT0014957	mmu-miR-1912-5p	miRNA	-0.0247326	0.434636	-0.213891	0.831889	0.99273
MIMAT0014851	mmu-miR-3071-3p	miRNA	-0.0251578	0.705887	-0.148231	0.883022	0.993175
MIMAT0025159	mmu-miR-6406	miRNA	-0.0251888	0.525359	-0.168198	0.867408	0.99273
MIMAT0000218	mmu-miR-24-1-5p	miRNA	-0.0254664	0.358646	-0.236352	0.814554	0.986774
MIMAT0000578	mmu-miR-337-3p	miRNA	-0.0259848	0.37439	-0.205634	0.838284	0.99273
MIMAT0004845	mmu-miR-881-5p	miRNA	-0.0261305	0.619612	-0.191637	0.849148	0.99273
MIMAT0004897	mmu-miR-654-5p	miRNA	-0.0263072	0.246841	-0.230618	0.818971	0.987695
MIMAT0005860	mmu-miR-1199-5p	miRNA	-0.0264208	0.301134	-0.229662	0.819708	0.987695
MIMAT0025081	mmu-miR-6338	miRNA	-0.0264434	0.461134	-0.151388	0.88055	0.993175
MIMAT0022368	mmu-miR-5620-3p	miRNA	-0.0267819	1.09172	-0.0970631	0.923237	0.994577
MIMAT0007877	mmu-miR-1894-5p	miRNA	-0.0269213	0.197875	-0.179625	0.858496	0.99273
MIMAT0029900	mmu-miR-290b-5p	miRNA	-0.0269821	0.194152	-0.293185	0.771134	0.982514
MIMAT0003515	mmu-miR-721	miRNA	-0.0270515	0.446677	-0.174158	0.862757	0.99273
MIMAT0025171	mmu-miR-6416-3p	miRNA	-0.0276484	0.601153	-0.16821	0.867398	0.99273
MIMAT0017349	mmu-miR-1964-5p	miRNA	-0.027652	0.32747	-0.177692	0.860002	0.99273
MIMAT0004828	mmu-miR-708-5p	miRNA	-0.0276797	0.435836	-0.203943	0.839594	0.99273
MIMAT0017001	mmu-miR-201-3p	miRNA	-0.0277339	0.645926	-0.195394	0.846229	0.99273
MIMAT0027825	mmu-miR-6962-3p	miRNA	-0.027755	0.420112	-0.216384	0.829961	0.99273
MIMAT0027761	mmu-miR-6930-3p	miRNA	-0.0278078	0.753781	-0.163733	0.870895	0.993175
MIMAT0007868	mmu-miR-1903	miRNA	-0.0282028	0.231275	-0.225292	0.823079	0.987695
MIMAT0028405	mmu-miR-7218-3p	miRNA	-0.0284695	0.639842	-0.194809	0.846683	0.99273
MIMAT0014874	mmu-miR-3083-5p	miRNA	-0.0285041	0.565566	-0.206878	0.837319	0.99273
MIMAT0025078	mmu-miR-133c	miRNA	-0.0286373	0.770896	-0.166182	0.868982	0.99273
MIMAT0017067	mmu-miR-181b-1-3p	miRNA	-0.0286574	0.385633	-0.22815	0.820874	0.987695
MIMAT0027910	mmu-miR-7003-5p	miRNA	-0.0287087	1.66478	-0.0569697	0.954897	0.994577
MIMAT0004936	mmu-miR-873a-5p	miRNA	-0.0290906	0.239269	-0.248217	0.805435	0.984531
MIMAT0003897	mmu-miR-759	miRNA	-0.0296146	0.485604	-0.204161	0.839425	0.99273
MIMAT0014890	mmu-miR-669p-3p	miRNA	-0.0298437	0.422732	-0.242111	0.810125	0.984531
MIMAT0025105	mmu-miR-145b	miRNA	-0.0298613	0.423017	-0.252026	0.802514	0.984531
MIMAT0017055	mmu-miR-219a-1-3p	miRNA	-0.0305885	0.268022	-0.239319	0.812271	0.984634
MIMAT0009418	mmu-miR-669l-5p	miRNA	-0.0308093	0.549704	-0.242043	0.810177	0.984531
MIMAT0003480	mmu-miR-297b-5p	miRNA	-0.0308107	0.265265	-0.279138	0.781802	0.982514
MIMAT0029826	mmu-miR-7660-5p	miRNA	-0.0308871	0.326764	-0.225686	0.822775	0.987695
MIMAT0028448	mmu-miR-7240-5p	miRNA	-0.0323677	0.595043	-0.246764	0.806551	0.984531
MIMAT0027899	mmu-miR-6998-3p	miRNA	-0.0325383	0.67251	-0.240194	0.811599	0.984531
MIMAT0028047	mmu-miR-7070-3p	miRNA	-0.0325936	0.495334	-0.277902	0.782743	0.982514
MIMAT0000745	mmu-miR-380-3p	miRNA	-0.0332708	0.427351	-0.273686	0.785955	0.982514
MIMAT0029901	mmu-miR-290b-3p	miRNA	-0.0334023	0.51578	-0.271181	0.787865	0.982514
MIMAT0017008	mmu-miR-301a-5p	miRNA	-0.0334278	0.455727	-0.243196	0.809291	0.984531
MIMAT0031419	mmu-miR-8113	miRNA	-0.0337333	1.80545	-0.0555427	0.956026	0.994577
MIMAT0025094	mmu-miR-6351	miRNA	-0.0337802	0.243688	-0.242287	0.80999	0.984531
MIMAT0017083	mmu-miR-133b-5p	miRNA	-0.0344997	0.443277	-0.225316	0.82306	0.987695
MIMAT0025114	mmu-miR-6370	miRNA	-0.0352372	0.373451	-0.352175	0.726845	0.973722
MIMAT0017173	mmu-miR-412-5p	miRNA	-0.0354801	0.674228	-0.234029	0.816343	0.987312
MIMAT0028043	mmu-miR-7068-3p	miRNA	-0.0355615	0.33431	-0.375671	0.709457	0.973722
MIMAT0001094	mmu-miR-412-3p	miRNA	-0.0356297	0.172436	-0.296571	0.768569	0.981212
MIMAT0028059	mmu-miR-7076-3p	miRNA	-0.0359636	0.228896	-0.387247	0.700948	0.973722
MIMAT0014824	mmu-miR-1251-5p	miRNA	-0.0361296	0.490248	-0.289712	0.773767	0.982514
MIMAT0000127	mmu-miR-29b-3p	miRNA	-0.0363612	0.445474	-0.366036	0.716569	0.973722
MIMAT0029834	mmu-miR-7664-5p	miRNA	-0.0364697	0.246493	-0.362839	0.718935	0.973722
MIMAT0004896	mmu-miR-590-3p	miRNA	-0.0365628	0.718081	-0.178134	0.859658	0.99273
MIMAT0000740	mmu-miR-376a-3p	miRNA	-0.0368132	0.409186	-0.274493	0.78534	0.982514
MIMAT0028420	mmu-miR-7226-5p	miRNA	-0.0372552	0.411968	-0.299032	0.766707	0.980729
MIMAT0003473	mmu-miR-133a-5p	miRNA	-0.0376144	0.463208	-0.332018	0.741881	0.973813
MIMAT0014869	mmu-miR-3080-3p	miRNA	-0.0381377	0.448081	-0.292216	0.771869	0.982514
MIMAT0017234	mmu-miR-592-3p	miRNA	-0.0381872	0.378001	-0.342291	0.734205	0.973813
MIMAT0009394	mmu-miR-1931	miRNA	-0.0381962	4.8444	-0.0325343	0.974233	0.994577
MIMAT0027703	mmu-miR-6901-3p	miRNA	-0.0382082	0.327098	-0.333695	0.740626	0.973813
MIMAT0025134	mmu-miR-6387	miRNA	-0.0383391	0.370947	-0.262513	0.794484	0.984531
MIMAT0016981	mmu-miR-99a-3p	miRNA	-0.0385519	0.424815	-0.30581	0.761584	0.980729
MIMAT0004826	mmu-miR-146b-3p	miRNA	-0.0390962	0.741254	-0.25447	0.800641	0.984531
MIMAT0009460	mmu-miR-1982-3p	miRNA	-0.039467	0.362287	-0.442986	0.660536	0.970893
MIMAT0029818	mmu-miR-7656-5p	miRNA	-0.0396959	0.21952	-0.331727	0.742099	0.973813
MIMAT0025178	mmu-miR-451b	miRNA	-0.0398217	0.44227	-0.299395	0.766432	0.980729
MIMAT0000904	mmu-miR-215-5p	miRNA	-0.0399058	0.525844	-0.288996	0.774311	0.982514
MIMAT0000653	mmu-miR-28a-5p	miRNA	-0.0403791	0.421636	-0.374056	0.710648	0.973722
MIMAT0014827	mmu-miR-3060-3p	miRNA	-0.040916	0.140737	-0.264069	0.793295	0.984531
MIMAT0031397	mmu-miR-1291	miRNA	-0.0409176	0.919016	-0.117859	0.906861	0.994345
MIMAT0027947	mmu-miR-7021-3p	miRNA	-0.040961	0.135228	-0.347898	0.730027	0.973813
MIMAT0028085	mmu-miR-7089-3p	miRNA	-0.0409982	0.526521	-0.276421	0.783871	0.982514
MIMAT0004618	mmu-miR-196a-2-3p	miRNA	-0.0416363	0.338717	-0.267309	0.79082	0.983962
MIMAT0022715	mmu-miR-449c-3p	miRNA	-0.0417464	0.406008	-0.36169	0.719786	0.973722
MIMAT0000216	mmu-miR-187-3p	miRNA	-0.0419636	0.317071	-0.38386	0.703434	0.973722
MIMAT0004627	mmu-miR-20a-3p	miRNA	-0.0421381	0.627519	-0.33839	0.737116	0.973813
MIMAT0003741	mmu-miR-674-3p	miRNA	-0.0424557	0.629129	-0.288491	0.774694	0.982514
MIMAT0027963	mmu-miR-7029-3p	miRNA	-0.0427161	0.347608	-0.366986	0.715867	0.973722
MIMAT0000748	mmu-miR-383-5p	miRNA	-0.0428	0.582924	-0.287288	0.775607	0.982514
MIMAT0025137	mmu-miR-6389	miRNA	-0.0431894	0.309245	-0.363855	0.718182	0.973722
MIMAT0014949	mmu-miR-3109-5p	miRNA	-0.0436296	0.527102	-0.330082	0.743331	0.974401
MIMAT0003190	mmu-miR-291b-3p	miRNA	-0.0437097	0.400747	-0.352811	0.726373	0.973722
MIMAT0020540	mmu-miR-5046	miRNA	-0.0439767	1.18823	-0.177261	0.860338	0.99273
MIMAT0028055	mmu-miR-7074-3p	miRNA	-0.0442032	0.31887	-0.36276	0.718993	0.973722
MIMAT0014863	mmu-miR-3077-3p	miRNA	-0.044289	0.242161	-0.406155	0.687132	0.973722
MIMAT0007866	mmu-miR-1905	miRNA	-0.0442921	1.02112	-0.161489	0.872649	0.993175
MIMAT0017194	mmu-miR-452-3p	miRNA	-0.0445024	0.30321	-0.362719	0.719023	0.973722
MIMAT0027808	mmu-miR-6954-5p	miRNA	-0.0446237	1.89349	-0.081949	0.93516	0.994577
MIMAT0028024	mmu-miR-7060-5p	miRNA	-0.0448127	0.572647	-0.329765	0.743568	0.974401
MIMAT0028134	mmu-miR-7118-3p	miRNA	-0.0453174	0.617977	-0.284115	0.778017	0.982514
MIMAT0025165	mmu-miR-6412	miRNA	-0.0454061	0.378687	-0.441923	0.661298	0.970893
MIMAT0027827	mmu-miR-6963-3p	miRNA	-0.0457168	0.731346	-0.253073	0.801711	0.984531
MIMAT0028031	mmu-miR-7063-3p	miRNA	-0.0462351	0.316792	-0.450579	0.655107	0.970893
MIMAT0009395	mmu-miR-1932	miRNA	-0.0463028	0.824635	-0.24406	0.808627	0.984531
MIMAT0014840	mmu-miR-3067-5p	miRNA	-0.0469736	0.681743	-0.305392	0.761899	0.980729
MIMAT0025117	mmu-miR-6373	miRNA	-0.047205	0.363997	-0.398551	0.692675	0.973722
MIMAT0028445	mmu-miR-7238-3p	miRNA	-0.0475869	0.682177	-0.249296	0.804608	0.984531
MIMAT0003184	mmu-miR-487b-3p	miRNA	-0.047915	0.271963	-0.428385	0.671029	0.972151
MIMAT0027800	mmu-miR-6950-5p	miRNA	-0.0481531	0.257011	-0.396549	0.694138	0.973722
MIMAT0022985	mmu-miR-5107-3p	miRNA	-0.0481694	0.403135	-0.277782	0.782834	0.982514
MIMAT0027793	mmu-miR-6946-3p	miRNA	-0.0482236	0.643519	-0.388865	0.699761	0.973722
MIMAT0031404	mmu-miR-497b	miRNA	-0.0485533	0.401241	-0.382405	0.704503	0.973722
MIMAT0000741	mmu-miR-377-3p	miRNA	-0.049401	0.366036	-0.332141	0.741789	0.973813
MIMAT0014923	mmu-miR-344e-5p	miRNA	-0.0496824	0.344715	-0.249446	0.804492	0.984531
MIMAT0022383	mmu-miR-344h-5p	miRNA	-0.0496824	0.344715	-0.249446	0.804492	0.984531
MIMAT0025141	mmu-miR-6392-5p	miRNA	-0.049761	0.461183	-0.387461	0.700791	0.973722
MIMAT0027878	mmu-miR-6988-5p	miRNA	-0.0500434	0.19637	-0.390398	0.698638	0.973722
MIMAT0028429	mmu-miR-7230-3p	miRNA	-0.0500474	0.619922	-0.352374	0.726698	0.973722
MIMAT0003167	mmu-miR-540-3p	miRNA	-0.0501069	0.524246	-0.447001	0.657663	0.970893
MIMAT0029892	mmu-miR-219c-5p	miRNA	-0.0502155	0.585404	-0.35617	0.723878	0.973722
MIMAT0017276	mmu-miR-493-5p	miRNA	-0.0502964	0.276155	-0.446387	0.658102	0.970893
MIMAT0014805	mmu-miR-1843a-5p	miRNA	-0.050623	0.827158	-0.305187	0.762055	0.980729
MIMAT0027836	mmu-miR-6967-5p	miRNA	-0.0514971	0.557974	-0.26916	0.789407	0.983538
MIMAT0003409	mmu-miR-467a-5p	miRNA	-0.0516177	0.346137	-0.373794	0.710841	0.973722
MIMAT0005847	mmu-miR-1190	miRNA	-0.0518019	0.71248	-0.255678	0.799715	0.984531
MIMAT0004628	mmu-miR-21a-3p	miRNA	-0.0525106	0.565498	-0.314465	0.755058	0.980729
MIMAT0014832	mmu-miR-3063-5p	miRNA	-0.052601	0.109726	-0.560214	0.578947	0.959714
MIMAT0017264	mmu-miR-181d-3p	miRNA	-0.0527293	0.839919	-0.253352	0.801497	0.984531
MIMAT0017065	mmu-miR-19b-1-5p	miRNA	-0.0527356	0.539568	-0.441671	0.661478	0.970893
MIMAT0028132	mmu-miR-7117-3p	miRNA	-0.0528566	0.837663	-0.272626	0.786763	0.982514
MIMAT0028092	mmu-miR-7093-5p	miRNA	-0.0530704	0.130033	-0.492956	0.625161	0.969356
MIMAT0004758	mmu-miR-463-3p	miRNA	-0.0531125	0.454026	-0.425468	0.673133	0.973325
MIMAT0020611	mmu-miR-5104	miRNA	-0.0531697	0.593147	-0.300747	0.765409	0.980729
MIMAT0000516	mmu-miR-148a-3p	miRNA	-0.0532543	0.563686	-0.348992	0.729212	0.973722
MIMAT0017207	mmu-miR-543-5p	miRNA	-0.0535527	0.106594	-0.512573	0.611511	0.967856
MIMAT0003474	mmu-miR-694	miRNA	-0.053764	0.526197	-0.385084	0.702535	0.973722
MIMAT0017068	mmu-miR-181c-3p	miRNA	-0.0538127	0.624297	-0.409387	0.684782	0.973722
MIMAT0025088	mmu-miR-6345	miRNA	-0.0541223	0.695732	-0.391274	0.697997	0.973722
MIMAT0027736	mmu-miR-6918-5p	miRNA	-0.0541276	0.33656	-0.368298	0.714898	0.973722
MIMAT0028057	mmu-miR-7075-3p	miRNA	-0.0547063	0.364959	-0.379335	0.70676	0.973722
MIMAT0027704	mmu-miR-6902-5p	miRNA	-0.0550062	0.237814	-0.519411	0.606785	0.967856
MIMAT0004849	mmu-miR-883a-3p	miRNA	-0.0552114	0.55347	-0.404248	0.688521	0.973722
MIMAT0001095	mmu-miR-370-3p	miRNA	-0.0552115	0.334826	-0.387234	0.700957	0.973722
MIMAT0028389	mmu-miR-7210-3p	miRNA	-0.0552775	0.515941	-0.488537	0.628255	0.969356
MIMAT0027826	mmu-miR-6963-5p	miRNA	-0.0559547	0.704362	-0.174648	0.862375	0.99273
MIMAT0003120	mmu-miR-483-3p	miRNA	-0.0559979	0.56962	-0.205929	0.838055	0.99273
MIMAT0027997	mmu-miR-7046-3p	miRNA	-0.0560434	0.736749	-0.306792	0.760842	0.980729
MIMAT0028417	mmu-miR-7224-3p	miRNA	-0.0562628	0.750434	-0.363899	0.71815	0.973722
MIMAT0027751	mmu-miR-6925-3p	miRNA	-0.0565586	0.483264	-0.437772	0.664276	0.970893
MIMAT0004788	mmu-miR-20b-3p	miRNA	-0.0566555	0.460862	-0.449856	0.655623	0.970893
MIMAT0027840	mmu-miR-6969-5p	miRNA	-0.0569223	0.57968	-0.349949	0.7285	0.973722
MIMAT0027967	mmu-miR-7031-3p	miRNA	-0.0572303	0.377856	-0.473661	0.63872	0.969356
MIMAT0000382	mmu-miR-34b-5p	miRNA	-0.0573458	0.666731	-0.430742	0.669331	0.972151
MIMAT0028026	mmu-miR-7061-5p	miRNA	-0.0574084	0.67977	-0.397936	0.693124	0.973722
MIMAT0003451	mmu-miR-677-5p	miRNA	-0.0574825	0.302675	-0.436374	0.665279	0.971196
MIMAT0004531	mmu-miR-135a-1-3p	miRNA	-0.0579666	0.557118	-0.322471	0.749039	0.979552
MIMAT0025166	mmu-miR-6413	miRNA	-0.058538	-0.0192435	-0.629218	0.533344	0.942101
MIMAT0028023	mmu-miR-7059-3p	miRNA	-0.0585532	0.726018	-0.37681	0.708619	0.973722
MIMAT0029853	mmu-miR-7673-3p	miRNA	-0.0585703	0.607105	-0.367837	0.715238	0.973722
MIMAT0004745	mmu-miR-384-5p	miRNA	-0.0588085	0.88309	-0.309627	0.758704	0.980729
MIMAT0009431	mmu-miR-1958	miRNA	-0.0593115	0.359377	-0.499826	0.620365	0.968957
MIMAT0017178	mmu-miR-429-5p	miRNA	-0.0593421	0.636782	-0.388941	0.699706	0.973722
MIMAT0000739	mmu-miR-375-3p	miRNA	-0.0593875	0.541633	-0.532774	0.597599	0.965437
MIMAT0022377	mmu-miR-5624-5p	miRNA	-0.0595218	0.574919	-0.39929	0.692136	0.973722
MIMAT0014849	mmu-miR-3070b-3p	miRNA	-0.0595879	0.431282	-0.403136	0.689331	0.973722
MIMAT0005841	mmu-miR-669h-5p	miRNA	-0.0598513	0.281836	-0.520398	0.606104	0.967856
MIMAT0022370	mmu-miR-5621-3p	miRNA	-0.0600376	0.585316	-0.404104	0.688626	0.973722
MIMAT0003466	mmu-miR-687	miRNA	-0.0601618	0.153308	-0.58718	0.5609	0.949597
MIMAT0004838	mmu-miR-742-5p	miRNA	-0.0602036	0.396554	-0.489988	0.627239	0.969356
MIMAT0000368	mmu-miR-291a-3p	miRNA	-0.0602169	0.384642	-0.48391	0.631502	0.969356
MIMAT0014866	mmu-miR-3079-5p	miRNA	-0.0604819	0.212198	-0.56047	0.578774	0.959714
MIMAT0028127	mmu-miR-7115-5p	miRNA	-0.0604853	0.578548	-0.252122	0.80244	0.984531
MIMAT0017258	mmu-miR-500-5p	miRNA	-0.0608547	0.378359	-0.472152	0.639786	0.969356
MIMAT0004634	mmu-miR-31-3p	miRNA	-0.0614883	0.550237	-0.421232	0.676194	0.973722
MIMAT0014817	mmu-miR-3106-5p	miRNA	-0.0615641	0.349819	-0.497676	0.621864	0.969356
MIMAT0029893	mmu-miR-219c-3p	miRNA	-0.0615824	0.205627	-0.626104	0.53536	0.942101
MIMAT0014925	mmu-miR-344b-5p	miRNA	-0.0617709	0.608803	-0.354998	0.724749	0.973722
MIMAT0017012	mmu-miR-192-3p	miRNA	-0.0619178	0.413406	-0.55388	0.583227	0.961329
MIMAT0014893	mmu-miR-466n-5p	miRNA	-0.0620291	0.581065	-0.456782	0.650686	0.970004
MIMAT0000551	mmu-miR-323-3p	miRNA	-0.0620457	0.140051	-0.456711	0.650736	0.970004
MIMAT0004636	mmu-miR-93-3p	miRNA	-0.062092	1.85753	-0.0792954	0.937255	0.994577
MIMAT0004889	mmu-miR-504-5p	miRNA	-0.0625514	0.388704	-0.574014	0.569675	0.953456
MIMAT0028077	mmu-miR-7085-3p	miRNA	-0.0628088	0.682186	-0.378495	0.707378	0.973722
MIMAT0004865	mmu-miR-297c-5p	miRNA	-0.0629691	0.676814	-0.440697	0.662177	0.970893
MIMAT0004868	mmu-miR-343	miRNA	-0.0631771	0.440581	-0.556278	0.581605	0.961329
MIMAT0029794	mmu-miR-7646-5p	miRNA	-0.0632958	0.257422	-0.425141	0.673369	0.973325
MIMAT0027885	mmu-miR-6991-3p	miRNA	-0.063531	0.787257	-0.390405	0.698633	0.973722
MIMAT0015642	mmu-miR-3471	miRNA	-0.0636221	0.462639	-0.344322	0.73269	0.973813
MIMAT0019345	mmu-miR-1843b-5p	miRNA	-0.0637977	0.404551	-0.566346	0.574818	0.957892
MIMAT0027987	mmu-miR-7041-3p	miRNA	-0.0639933	0.665405	-0.35067	0.727964	0.973722
MIMAT0017047	mmu-miR-1a-2-5p	miRNA	-0.0643333	0.287649	-0.578639	0.566585	0.953456
MIMAT0017241	mmu-miR-672-3p	miRNA	-0.0643881	0.127662	-0.657844	0.514996	0.937929
MIMAT0000533	mmu-miR-26a-5p	miRNA	-0.0644238	3.93033	-0.044493	0.964768	0.994577
MIMAT0027772	mmu-miR-6936-5p	miRNA	-0.0646153	0.418129	-0.524637	0.603184	0.967856
MIMAT0028450	mmu-miR-7241-5p	miRNA	-0.0646562	0.871054	-0.313969	0.755432	0.980729
MIMAT0000742	mmu-miR-378a-5p	miRNA	-0.0647909	1.0398	-0.155859	0.877051	0.993175
MIMAT0027727	mmu-miR-6913-3p	miRNA	-0.064955	0.361874	-0.524449	0.603314	0.967856
MIMAT0027741	mmu-miR-6920-3p	miRNA	-0.0651481	0.652035	-0.349608	0.728754	0.973722
MIMAT0028419	mmu-miR-7225-3p	miRNA	-0.0654081	0.172075	-0.478683	0.635179	0.969356
MIMAT0027855	mmu-miR-6976-3p	miRNA	-0.0660769	0.690899	-0.400613	0.691171	0.973722
MIMAT0017280	mmu-miR-208b-5p	miRNA	-0.0665631	0.25807	-0.554369	0.582896	0.961329
MIMAT0017056	mmu-miR-223-5p	miRNA	-0.0668575	0.273897	-0.658432	0.514623	0.937929
MIMAT0000375	mmu-miR-297a-5p	miRNA	-0.0669659	0.875092	-0.315803	0.754051	0.980729
MIMAT0004691	mmu-miR-382-3p	miRNA	-0.0674805	0.13271	-0.589841	0.559134	0.949479
MIMAT0025087	mmu-miR-6344	miRNA	-0.0680574	0.567969	-0.562722	0.577257	0.959005
MIMAT0017066	mmu-miR-92a-1-5p	miRNA	-0.0682583	0.504375	-0.466794	0.643576	0.96994
MIMAT0014807	mmu-miR-344d-3-5p	miRNA	-0.0687585	0.370185	-0.4701	0.641237	0.969477
MIMAT0029864	mmu-miR-292b-5p	miRNA	-0.0689907	0.555359	-0.411403	0.683317	0.973722
MIMAT0029890	mmu-miR-7684-5p	miRNA	-0.0690806	0.497764	-0.364012	0.718067	0.973722
MIMAT0031409	mmu-miR-8105	miRNA	-0.0691245	0.939229	-0.304085	0.762887	0.980729
MIMAT0017350	mmu-miR-1968-3p	miRNA	-0.0691716	0.243286	-0.631685	0.531749	0.942101
MIMAT0004217	mmu-miR-465a-3p	miRNA	-0.069341	0.444569	-0.47732	0.636139	0.969356
MIMAT0004872	mmu-miR-465b-3p	miRNA	-0.069341	0.444569	-0.47732	0.636139	0.969356
MIMAT0004874	mmu-miR-465c-3p	miRNA	-0.069341	0.444569	-0.47732	0.636139	0.969356
MIMAT0027721	mmu-miR-6910-3p	miRNA	-0.069354	0.550677	-0.542682	0.590832	0.962427
MIMAT0000155	mmu-miR-142-3p	miRNA	-0.0694531	0.444418	-0.708102	0.483631	0.934125
MIMAT0019356	mmu-miR-3971	miRNA	-0.0699133	0.635453	-0.531326	0.598591	0.965437
MIMAT0027782	mmu-miR-6941-5p	miRNA	-0.0699839	1.12145	-0.195807	0.845908	0.99273
MIMAT0028033	mmu-miR-7064-3p	miRNA	-0.0708712	0.0746096	-0.693515	0.492621	0.934125
MIMAT0027909	mmu-miR-6973b-3p	miRNA	-0.0711668	0.502869	-0.551214	0.585033	0.961375
MIMAT0000137	mmu-miR-126a-5p	miRNA	-0.0718572	0.614277	-0.416748	0.67944	0.973722
MIMAT0017330	mmu-miR-669e-3p	miRNA	-0.0725403	0.495568	-0.493061	0.625088	0.969356
MIMAT0025170	mmu-miR-6416-5p	miRNA	-0.0731286	0.488139	-0.47899	0.634962	0.969356
MIMAT0002107	mmu-miR-466a-3p	miRNA	-0.0733592	0.62404	-0.503731	0.617646	0.967856
MIMAT0004880	mmu-miR-466e-3p	miRNA	-0.0733592	0.62404	-0.503731	0.617646	0.967856
MIMAT0000146	mmu-miR-134-5p	miRNA	-0.0734464	0.462905	-0.535937	0.595435	0.965304
MIMAT0027859	mmu-miR-6978-3p	miRNA	-0.0735541	0.204933	-0.652612	0.518324	0.937929
MIMAT0025586	mmu-miR-6540-3p	miRNA	-0.0735845	0.203702	-0.755093	0.455308	0.934125
MIMAT0007874	mmu-miR-1904	miRNA	-0.0737276	0.536167	-0.558199	0.580307	0.961133
MIMAT0027853	mmu-miR-6975-3p	miRNA	-0.0742951	0.804943	-0.38415	0.70322	0.973722
MIMAT0017348	mmu-miR-1955-3p	miRNA	-0.0748715	0.450041	-0.457065	0.650484	0.970004
MIMAT0004621	mmu-let-7b-3p	miRNA	-0.0751504	0.736931	-0.507225	0.615219	0.967856
MIMAT0016997	mmu-miR-187-5p	miRNA	-0.0753269	1.08098	-0.192472	0.848499	0.99273
MIMAT0025128	mmu-miR-6382	miRNA	-0.0758932	0.422599	-0.480431	0.633948	0.969356
MIMAT0028063	mmu-miR-7078-3p	miRNA	-0.0762209	0.603195	-0.584199	0.56288	0.950619
MIMAT0000378	mmu-miR-300-3p	miRNA	-0.0766815	0.488035	-0.728945	0.470946	0.934125
MIMAT0000374	mmu-miR-296-5p	miRNA	-0.0770209	0.752202	-0.461908	0.647042	0.970004
MIMAT0027999	mmu-miR-7047-3p	miRNA	-0.0772004	0.663863	-0.461129	0.647595	0.970004
MIMAT0020639	mmu-miR-5128	miRNA	-0.0772462	6.59781	-0.0672059	0.946805	0.994577
MIMAT0016989	mmu-miR-146a-3p	miRNA	-0.0777095	0.403952	-0.667151	0.509106	0.937929
MIMAT0020634	mmu-miR-5124a	miRNA	-0.0779579	0.271325	-0.69962	0.488847	0.934125
MIMAT0004786	mmu-miR-540-5p	miRNA	-0.0779659	0.57414	-0.513505	0.610866	0.967856
MIMAT0004631	mmu-miR-29a-5p	miRNA	-0.0782188	0.665033	-0.442794	0.660674	0.970893
MIMAT0009425	mmu-miR-1954	miRNA	-0.0785111	0.354945	-0.553554	0.583448	0.961329
MIMAT0027962	mmu-miR-7029-5p	miRNA	-0.0785865	0.43948	-0.695475	0.491408	0.934125
MIMAT0000744	mmu-miR-380-5p	miRNA	-0.078668	0.354746	-0.613719	0.54342	0.942804
MIMAT0003510	mmu-miR-717	miRNA	-0.0786946	0.17381	-0.623001	0.537374	0.942101
MIMAT0004852	mmu-miR-190b-5p	miRNA	-0.0787945	0.354259	-0.65253	0.518376	0.937929
MIMAT0028065	mmu-miR-7079-3p	miRNA	-0.0791273	0.321757	-0.671044	0.506653	0.937929
MIMAT0009391	mmu-miR-1928	miRNA	-0.0792373	0.456886	-0.650052	0.519956	0.939161
MIMAT0003376	mmu-miR-302c-3p	miRNA	-0.0794451	0.120065	-0.737862	0.465579	0.934125
MIMAT0025150	mmu-miR-6398	miRNA	-0.0796133	0.223051	-0.631153	0.532093	0.942101
MIMAT0004940	mmu-miR-511-5p	miRNA	-0.0796365	0.703193	-0.467086	0.64337	0.96994
MIMAT0017326	mmu-miR-1b-3p	miRNA	-0.0796923	0.507042	-0.643124	0.524388	0.941453
MIMAT0014953	mmu-miR-374c-5p	miRNA	-0.0797319	0.447598	-0.720516	0.476053	0.934125
MIMAT0014884	mmu-miR-669d-2-3p	miRNA	-0.0798229	0.203017	-0.703913	0.486203	0.934125
MIMAT0022987	mmu-miR-5129-3p	miRNA	-0.0800618	0.5443	-0.679987	0.501042	0.934351
MIMAT0028435	mmu-miR-7233-3p	miRNA	-0.0803491	0.560446	-0.509988	0.613302	0.967856
MIMAT0028408	mmu-miR-7220-5p	miRNA	-0.0807596	0.373286	-0.679328	0.501455	0.934351
MIMAT0014825	mmu-miR-1251-3p	miRNA	-0.0807787	0.514088	-0.615214	0.542443	0.942698
MIMAT0017248	mmu-miR-679-3p	miRNA	-0.0809926	0.460005	-0.695309	0.491511	0.934125
MIMAT0003732	mmu-miR-668-3p	miRNA	-0.0811972	0.60956	-0.473703	0.63869	0.969356
MIMAT0025148	mmu-miR-21c	miRNA	-0.0813283	0.136944	-0.70093	0.48804	0.934125
MIMAT0027901	mmu-miR-6999-3p	miRNA	-0.0813332	0.19811	-0.681692	0.499977	0.934125
MIMAT0009434	mmu-miR-1961	miRNA	-0.0819607	0.586832	-0.601716	0.55129	0.946964
MIMAT0027985	mmu-miR-7040-3p	miRNA	-0.0822206	0.333476	-0.511873	0.611995	0.967856
MIMAT0027956	mmu-miR-7026-5p	miRNA	-0.0823361	0.501236	-0.594318	0.55617	0.947475
MIMAT0009421	mmu-miR-669o-5p	miRNA	-0.0828573	0.694054	-0.492728	0.625321	0.969356
MIMAT0017279	mmu-miR-873a-3p	miRNA	-0.0829299	0.253469	-0.912638	0.367755	0.889235
MIMAT0004841	mmu-miR-871-5p	miRNA	-0.0830251	0.564163	-0.620701	0.538869	0.942101
MIMAT0012771	mmu-miR-432	miRNA	-0.0833979	0.148915	-0.819585	0.418069	0.920806
MIMAT0004873	mmu-miR-465c-5p	miRNA	-0.083495	0.469515	-0.811707	0.422515	0.920806
MIMAT0004527	mmu-miR-124-5p	miRNA	-0.0836954	0.521814	-0.520311	0.606164	0.967856
MIMAT0000711	mmu-miR-365-3p	miRNA	-0.0840168	0.667025	-0.526151	0.602144	0.967856
MIMAT0014802	mmu-miR-1264-5p	miRNA	-0.0841342	0.301204	-0.84138	0.405919	0.917495
MIMAT0017005	mmu-miR-122-3p	miRNA	-0.0844042	0.201453	-0.654772	0.516949	0.937929
MIMAT0029828	mmu-miR-7661-5p	miRNA	-0.0848754	0.406799	-0.514214	0.610375	0.967856
MIMAT0025083	mmu-miR-6340	miRNA	-0.0851586	0.645581	-0.532849	0.597548	0.965437
MIMAT0028075	mmu-miR-7084-3p	miRNA	-0.0852515	0.59968	-0.620077	0.539275	0.942101
MIMAT0017266	mmu-miR-880-5p	miRNA	-0.0853778	0.612294	-0.498979	0.620956	0.968957
MIMAT0027693	mmu-miR-6896-3p	miRNA	-0.0853989	0.441715	-0.400097	0.691547	0.973722
MIMAT0017351	mmu-miR-1981-3p	miRNA	-0.085864	0.430153	-0.563089	0.577009	0.959005
MIMAT0027888	mmu-miR-6993-5p	miRNA	-0.0859859	0.6012	-0.625483	0.535763	0.942101
MIMAT0024858	mmu-miR-6237	miRNA	-0.0866464	0.600937	-0.685673	0.497493	0.934125
MIMAT0019352	mmu-miR-3968	miRNA	-0.0878896	0.781884	-0.505376	0.616502	0.967856
MIMAT0028050	mmu-miR-7072-5p	miRNA	-0.0879408	0.716607	-0.382906	0.704135	0.973722
MIMAT0025136	mmu-miR-5124b	miRNA	-0.0883139	0.0573983	-0.752295	0.456967	0.934125
MIMAT0027966	mmu-miR-7031-5p	miRNA	-0.0883578	0.575814	-0.546086	0.588515	0.961375
MIMAT0004664	mmu-miR-214-5p	miRNA	-0.0887163	0.563704	-0.575428	0.56873	0.953456
MIMAT0001537	mmu-miR-429-3p	miRNA	-0.0890628	0.670251	-0.633062	0.53086	0.942101
MIMAT0014826	mmu-miR-3060-5p	miRNA	-0.0894385	0.611517	-0.683693	0.498728	0.934125
MIMAT0028440	mmu-miR-7236-5p	miRNA	-0.0896835	0.407098	-0.596642	0.554635	0.947475
MIMAT0022372	mmu-miR-5622-3p	miRNA	-0.0897985	1.37721	-0.256654	0.798968	0.984531
MIMAT0027931	mmu-miR-7013-3p	miRNA	-0.0898361	0.667685	-0.566216	0.574905	0.957892
MIMAT0000704	mmu-miR-361-5p	miRNA	-0.0898472	1.42657	-0.154641	0.878004	0.993175
MIMAT0029829	mmu-miR-7661-3p	miRNA	-0.0900369	0.658916	-0.70626	0.48476	0.934125
MIMAT0000665	mmu-miR-223-3p	miRNA	-0.0902305	0.737693	-0.405032	0.68795	0.973722
MIMAT0027849	mmu-miR-6973a-3p	miRNA	-0.0902526	0.630111	-0.526624	0.601818	0.967856
MIMAT0003112	mmu-miR-489-3p	miRNA	-0.0905977	0.72651	-0.589535	0.559337	0.949479
MIMAT0000586	mmu-miR-340-3p	miRNA	-0.0909185	0.640537	-0.73328	0.468333	0.934125
MIMAT0022690	mmu-miR-184-5p	miRNA	-0.090964	0.0838755	-1.02314	0.313348	0.86553
MIMAT0027706	mmu-miR-6903-5p	miRNA	-0.0910004	0.515146	-0.655108	0.516735	0.937929
MIMAT0004856	mmu-miR-105	miRNA	-0.0911916	0.54805	-0.778626	0.441498	0.930805
MIMAT0031402	mmu-miR-142b	miRNA	-0.0917973	0.523945	-0.658107	0.514829	0.937929
MIMAT0014879	mmu-miR-3085-3p	miRNA	-0.0932608	0.670287	-0.553633	0.583394	0.961329
MIMAT0009433	mmu-miR-1960	miRNA	-0.0932735	0.374789	-0.714077	0.479975	0.934125
MIMAT0000237	mmu-miR-204-5p	miRNA	-0.0932878	0.616966	-0.577022	0.567664	0.953456
MIMAT0014882	mmu-miR-466m-5p	miRNA	-0.0933043	1.33147	-0.34229	0.734205	0.973813
MIMAT0017346	mmu-miR-669m-5p	miRNA	-0.0933043	1.33147	-0.34229	0.734205	0.973813
MIMAT0027874	mmu-miR-6986-5p	miRNA	-0.0935206	0.858438	-0.356771	0.723433	0.973722
MIMAT0004659	mmu-miR-10a-3p	miRNA	-0.0937468	0.136926	-0.95653	0.345448	0.87629
MIMAT0004943	mmu-miR-653-5p	miRNA	-0.0939465	0.446917	-0.695686	0.491277	0.934125
MIMAT0014900	mmu-miR-3089-3p	miRNA	-0.0940497	0.351543	-0.697869	0.489928	0.934125
MIMAT0014902	mmu-miR-3090-3p	miRNA	-0.0941	0.476415	-0.760697	0.451997	0.934125
MIMAT0025106	mmu-miR-6362	miRNA	-0.0947598	0.603763	-0.639067	0.526992	0.942101
MIMAT0004616	mmu-miR-30c-1-3p	miRNA	-0.0952832	0.304844	-0.886742	0.381347	0.898283
MIMAT0027833	mmu-miR-3547-3p	miRNA	-0.0953046	0.331311	-0.823517	0.41586	0.920806
MIMAT0014933	mmu-miR-3102-5p	miRNA	-0.0955145	3.7516	-0.0756346	0.940146	0.994577
MIMAT0020631	mmu-miR-466q	miRNA	-0.0958796	0.279998	-0.812404	0.422121	0.920806
MIMAT0004824	mmu-miR-673-3p	miRNA	-0.0959424	0.418105	-0.729197	0.470794	0.934125
MIMAT0000679	mmu-miR-217-5p	miRNA	-0.0961404	0.505372	-0.662766	0.511877	0.937929
MIMAT0004684	mmu-miR-362-3p	miRNA	-0.0961575	0.328887	-0.838024	0.407775	0.917495
MIMAT0027810	mmu-miR-6955-5p	miRNA	-0.096375	0.566166	-0.643499	0.524148	0.941453
MIMAT0029846	mmu-miR-7670-5p	miRNA	-0.0964827	0.553231	-0.57562	0.568601	0.953456
MIMAT0003170	mmu-miR-541-5p	miRNA	-0.0970595	0.662814	-0.627158	0.534677	0.942101
MIMAT0022381	mmu-miR-5626-5p	miRNA	-0.0971851	0.709383	-0.544642	0.589497	0.962156
MIMAT0017063	mmu-miR-29b-2-5p	miRNA	-0.0975037	0.704606	-0.60985	0.54595	0.944036
MIMAT0028404	mmu-miR-7218-5p	miRNA	-0.0976632	0.652327	-0.700558	0.488269	0.934125
MIMAT0014935	mmu-miR-3102-3p.2-3p	miRNA	-0.0981007	0.591461	-0.717707	0.477761	0.934125
MIMAT0017036	mmu-miR-148b-5p	miRNA	-0.0981754	0.704991	-0.595728	0.555238	0.947475
MIMAT0017243	mmu-miR-669a-3p	miRNA	-0.098236	0.475792	-0.813784	0.42134	0.920806
MIMAT0017347	mmu-miR-669o-3p	miRNA	-0.098236	0.475792	-0.813784	0.42134	0.920806
MIMAT0017017	mmu-let-7f-2-3p	miRNA	-0.098775	0.576201	-0.75336	0.456335	0.934125
MIMAT0028056	mmu-miR-7075-5p	miRNA	-0.0988562	0.391954	-0.725116	0.473262	0.934125
MIMAT0014837	mmu-miR-3065-3p	miRNA	-0.0990007	0.194973	-1.04175	0.30476	0.86553
MIMAT0020633	mmu-miR-5123	miRNA	-0.0990255	0.206569	-1.03388	0.308375	0.86553
MIMAT0017075	mmu-miR-361-3p	miRNA	-0.0994455	0.446198	-0.70512	0.485461	0.934125
MIMAT0025123	mmu-let-7j	miRNA	-0.0996667	1.22018	-0.256655	0.798967	0.984531
MIMAT0003173	mmu-miR-547-3p	miRNA	-0.0998147	0.580294	-0.717479	0.4779	0.934125
MIMAT0017071	mmu-miR-7b-3p	miRNA	-0.0999958	0.559021	-0.723797	0.474061	0.934125
MIMAT0028006	mmu-miR-7051-5p	miRNA	-0.100044	0.565299	-0.655105	0.516737	0.937929
MIMAT0004523	mmu-miR-29b-1-5p	miRNA	-0.100451	0.286189	-0.953764	0.346826	0.87629
MIMAT0029844	mmu-miR-7669-5p	miRNA	-0.100552	0.71897	-0.66772	0.508747	0.937929
MIMAT0025173	mmu-miR-6418-5p	miRNA	-0.100667	0.575694	-0.591077	0.558315	0.949479
MIMAT0017023	mmu-miR-98-3p	miRNA	-0.100789	0.55756	-0.655476	0.516501	0.937929
MIMAT0027828	mmu-miR-6964-5p	miRNA	-0.10108	0.00171721	-0.906032	0.371192	0.889235
MIMAT0027969	mmu-miR-7032-3p	miRNA	-0.101348	0.528954	-0.603752	0.549951	0.946964
MIMAT0000655	mmu-miR-100-5p	miRNA	-0.101453	0.502386	-0.699577	0.488874	0.934125
MIMAT0000142	mmu-miR-9-5p	miRNA	-0.101587	0.417119	-0.709286	0.482905	0.934125
MIMAT0029832	mmu-miR-7663-5p	miRNA	-0.101844	-0.0803887	-0.984458	0.331732	0.86553
MIMAT0016987	mmu-miR-138-2-3p	miRNA	-0.102001	0.271322	-0.711645	0.481461	0.934125
MIMAT0022385	mmu-miR-5627-5p	miRNA	-0.102806	0.676778	-0.512694	0.611427	0.967856
MIMAT0000371	mmu-miR-293-3p	miRNA	-0.102818	0.308638	-0.847383	0.402612	0.917495
MIMAT0004547	mmu-miR-203-5p	miRNA	-0.102991	0.38141	-0.604533	0.549438	0.946964
MIMAT0027708	mmu-miR-6904-5p	miRNA	-0.103075	0.288146	-0.881907	0.38392	0.898796
MIMAT0004660	mmu-miR-19a-5p	miRNA	-0.103195	0.315725	-0.715243	0.479263	0.934125
MIMAT0027813	mmu-miR-6956-3p	miRNA	-0.103842	0.523917	-0.990178	0.328969	0.86553
MIMAT0000134	mmu-miR-124-3p	miRNA	-0.103906	0.439559	-0.722594	0.474791	0.934125
MIMAT0028035	mmu-miR-7065-3p	miRNA	-0.104434	0.421102	-0.799338	0.429554	0.921546
MIMAT0017342	mmu-miR-1943-3p	miRNA	-0.10477	0.209006	-0.843951	0.404501	0.917495
MIMAT0028022	mmu-miR-7059-5p	miRNA	-0.104977	0.66525	-0.556591	0.581393	0.961329
MIMAT0017332	mmu-miR-1198-3p	miRNA	-0.105262	0.170882	-1.0212	0.314253	0.86553
MIMAT0009390	mmu-miR-1927	miRNA	-0.105525	0.393594	-0.840329	0.4065	0.917495
MIMAT0004661	mmu-miR-28a-3p	miRNA	-0.105576	0.288914	-0.98466	0.331634	0.86553
MIMAT0000249	mmu-miR-30e-3p	miRNA	-0.105847	0.553924	-0.802328	0.427846	0.921546
MIMAT0025104	mmu-miR-6361	miRNA	-0.106027	0.553874	-0.802422	0.427792	0.921546
MIMAT0000518	mmu-miR-196a-5p	miRNA	-0.106187	0.669256	-0.681088	0.500354	0.934125
MIMAT0027822	mmu-miR-6961-5p	miRNA	-0.106348	0.549576	-0.804819	0.426426	0.921546
MIMAT0004840	mmu-miR-743b-3p	miRNA	-0.106717	0.170652	-0.971249	0.338173	0.874951
MIMAT0028053	mmu-miR-7073-3p	miRNA	-0.107922	0.522312	-0.713089	0.480578	0.934125
MIMAT0014839	mmu-miR-3066-3p	miRNA	-0.108009	0.431473	-0.866249	0.392328	0.910862
MIMAT0004532	mmu-miR-136-3p	miRNA	-0.108436	0.528664	-1.00176	0.323422	0.86553
MIMAT0003461	mmu-miR-683	miRNA	-0.108717	0.671848	-0.76475	0.449611	0.934125
MIMAT0009423	mmu-miR-1952	miRNA	-0.109104	0.589359	-0.67602	0.503527	0.936383
MIMAT0003169	mmu-miR-539-5p	miRNA	-0.109381	0.612663	-0.666168	0.509726	0.937929
MIMAT0027815	mmu-miR-6957-3p	miRNA	-0.109465	0.472301	-0.758899	0.453057	0.934125
MIMAT0000672	mmu-miR-199b-5p	miRNA	-0.109495	0.407535	-1.01699	0.316226	0.86553
MIMAT0014881	mmu-miR-3086-3p	miRNA	-0.109516	0.642291	-0.448551	0.656555	0.970893
MIMAT0003185	mmu-miR-369-5p	miRNA	-0.109788	0.606537	-0.739133	0.464817	0.934125
MIMAT0027851	mmu-miR-6974-3p	miRNA	-0.110055	0.360577	-0.767451	0.448025	0.934125
MIMAT0025127	mmu-miR-6381	miRNA	-0.11136	0.704198	-0.661923	0.51241	0.937929
MIMAT0027989	mmu-miR-7042-3p	miRNA	-0.111464	0.297088	-1.00513	0.321818	0.86553
MIMAT0004871	mmu-miR-465b-5p	miRNA	-0.111483	0.537793	-0.853215	0.399414	0.914912
MIMAT0027780	mmu-miR-6940-5p	miRNA	-0.111596	0.578013	-0.657399	0.515279	0.937929
MIMAT0002106	mmu-miR-465a-5p	miRNA	-0.111779	0.535543	-0.786133	0.437146	0.92684
MIMAT0028049	mmu-miR-7071-3p	miRNA	-0.112019	0.367645	-0.818893	0.418458	0.920806
MIMAT0027717	mmu-miR-6908-3p	miRNA	-0.112461	0.27736	-1.01781	0.315839	0.86553
MIMAT0027871	mmu-miR-6984-3p	miRNA	-0.112542	0.611951	-0.859318	0.396086	0.911619
MIMAT0027917	mmu-miR-7006-3p	miRNA	-0.113354	0.151473	-0.989404	0.329342	0.86553
MIMAT0000541	mmu-miR-96-5p	miRNA	-0.114071	0.705034	-0.609434	0.546223	0.944036
MIMAT0003508	mmu-miR-501-5p	miRNA	-0.114121	0.362899	-0.99404	0.327112	0.86553
MIMAT0017265	mmu-miR-871-3p	miRNA	-0.114146	0.563912	-0.642934	0.52451	0.941453
MIMAT0029871	mmu-miR-7678-3p	miRNA	-0.114283	0.57643	-0.910281	0.368979	0.889235
MIMAT0029848	mmu-miR-7671-5p	miRNA	-0.114694	0.515842	-0.734349	0.467689	0.934125
MIMAT0000230	mmu-miR-199a-3p	miRNA	-0.114977	0.450034	-0.907905	0.370216	0.889235
MIMAT0004667	mmu-miR-199b-3p	miRNA	-0.114977	0.450034	-0.907905	0.370216	0.889235
MIMAT0027742	mmu-miR-6921-5p	miRNA	-0.115527	0.996758	-0.471125	0.640512	0.969356
MIMAT0029817	mmu-miR-7655-3p	miRNA	-0.115904	0.674649	-0.76741	0.448049	0.934125
MIMAT0017042	mmu-miR-351-3p	miRNA	-0.116433	0.977888	-0.352624	0.726512	0.973722
MIMAT0029810	mmu-miR-7652-5p	miRNA	-0.116518	0.227915	-1.15151	0.257425	0.833899
MIMAT0025084	mmu-miR-6341	miRNA	-0.116531	0.285999	-1.00586	0.321471	0.86553
MIMAT0003497	mmu-miR-707	miRNA	-0.116794	0.728036	-0.925525	0.361111	0.889235
MIMAT0004887	mmu-miR-467d-3p	miRNA	-0.116944	0.188032	-0.797956	0.430345	0.921546
MIMAT0009443	mmu-miR-1946b	miRNA	-0.117402	1.14611	-0.428822	0.670713	0.972151
MIMAT0017038	mmu-miR-344-5p	miRNA	-0.117728	0.602025	-0.718324	0.477386	0.934125
MIMAT0028083	mmu-miR-7088-3p	miRNA	-0.118387	0.85098	-0.75132	0.457546	0.934125
MIMAT0000677	mmu-miR-7a-5p	miRNA	-0.11861	0.417726	-1.01565	0.316855	0.86553
MIMAT0027713	mmu-miR-6906-3p	miRNA	-0.119864	0.238395	-1.07418	0.290186	0.855502
MIMAT0002112	mmu-miR-471-5p	miRNA	-0.120073	0.22246	-1.16488	0.252045	0.833899
MIMAT0003781	mmu-miR-676-5p	miRNA	-0.120292	0.592751	-0.826141	0.414391	0.920806
MIMAT0028436	mmu-miR-7234-5p	miRNA	-0.120556	0.357769	-1.13233	0.265289	0.836278
MIMAT0014842	mmu-miR-3068-5p	miRNA	-0.121102	0.812618	-0.697947	0.48988	0.934125
MIMAT0028078	mmu-miR-7086-5p	miRNA	-0.121568	0.761519	-0.798879	0.429817	0.921546
MIMAT0027861	mmu-miR-6979-3p	miRNA	-0.12159	0.332552	-0.900744	0.373959	0.889667
MIMAT0028392	mmu-miR-7212-5p	miRNA	-0.121634	0.643963	-0.695203	0.491576	0.934125
MIMAT0014818	mmu-miR-3106-3p	miRNA	-0.121774	0.543516	-0.769132	0.447039	0.934125
MIMAT0000746	mmu-miR-381-3p	miRNA	-0.12178	0.500034	-1.18372	0.244601	0.833899
MIMAT0028446	mmu-miR-7239-5p	miRNA	-0.121821	0.274277	-1.0688	0.292569	0.855502
MIMAT0020642	mmu-miR-5131	miRNA	-0.122216	0.511591	-1.1312	0.26576	0.836278
MIMAT0027726	mmu-miR-6913-5p	miRNA	-0.122361	0.449399	-0.863297	0.393926	0.911619
MIMAT0027770	mmu-miR-6935-5p	miRNA	-0.122436	0.494258	-0.771972	0.445378	0.933825
MIMAT0004746	mmu-miR-409-5p	miRNA	-0.122961	0.79104	-0.531996	0.598132	0.965437
MIMAT0028037	mmu-miR-7066-3p	miRNA	-0.124207	0.603747	-0.815926	0.42013	0.920806
MIMAT0027818	mmu-miR-6959-5p	miRNA	-0.12421	0.722041	-0.608661	0.546729	0.944036
MIMAT0000246	mmu-miR-122-5p	miRNA	-0.124794	0.245598	-0.937793	0.354858	0.885059
MIMAT0000567	mmu-miR-329-3p	miRNA	-0.124921	0.706236	-0.815716	0.420249	0.920806
MIMAT0003452	mmu-miR-678	miRNA	-0.125131	0.589123	-0.715719	0.478972	0.934125
MIMAT0014865	mmu-miR-3078-3p	miRNA	-0.125145	0.324512	-1.28043	0.20892	0.821897
MIMAT0022699	mmu-miR-468-5p	miRNA	-0.125211	0.383064	-0.801984	0.428042	0.921546
MIMAT0027965	mmu-miR-7030-3p	miRNA	-0.125313	0.524077	-0.914057	0.36702	0.889235
MIMAT0022358	mmu-miR-1231-3p	miRNA	-0.125692	0.290034	-1.0648	0.294348	0.856121
MIMAT0000221	mmu-miR-191-5p	miRNA	-0.125842	7.02083	-0.0977746	0.922676	0.994577
MIMAT0004934	mmu-miR-872-5p	miRNA	-0.126175	0.535807	-0.832028	0.411105	0.918736
MIMAT0019339	mmu-miR-28c	miRNA	-0.126597	0.285849	-1.16275	0.252895	0.833899
MIMAT0025145	mmu-miR-1957b	miRNA	-0.126694	0.198074	-1.06785	0.292992	0.855502
MIMAT0012773	mmu-miR-767	miRNA	-0.127064	0.495499	-1.12325	0.269072	0.837504
MIMAT0016983	mmu-miR-130a-5p	miRNA	-0.127103	0.322068	-1.12824	0.266991	0.836278
MIMAT0014854	mmu-miR-3073a-5p	miRNA	-0.127172	0.519023	-0.992538	0.327833	0.86553
MIMAT0029873	mmu-miR-7679-3p	miRNA	-0.12726	0.904819	-0.473975	0.638498	0.969356
MIMAT0000136	mmu-miR-125b-5p	miRNA	-0.127348	0.840884	-0.547345	0.587659	0.961375
MIMAT0027986	mmu-miR-7041-5p	miRNA	-0.12743	0.670447	-0.930679	0.358475	0.889235
MIMAT0000377	mmu-miR-299a-5p	miRNA	-0.127578	0.692452	-0.974457	0.336601	0.873789
MIMAT0027733	mmu-miR-6916-3p	miRNA	-0.128287	0.446868	-0.975653	0.336016	0.873459
MIMAT0000223	mmu-miR-193a-3p	miRNA	-0.128697	0.226093	-1.14344	0.260714	0.835242
MIMAT0003375	mmu-miR-302c-5p	miRNA	-0.128709	0.521456	-1.16559	0.251763	0.833899
MIMAT0004669	mmu-miR-125b-1-3p	miRNA	-0.128754	0.49338	-0.910494	0.368868	0.889235
MIMAT0017232	mmu-miR-301b-5p	miRNA	-0.128758	0.549296	-1.06604	0.293797	0.855825
MIMAT0001091	mmu-miR-410-3p	miRNA	-0.129576	0.320473	-0.868412	0.391159	0.910862
MIMAT0004630	mmu-miR-26b-3p	miRNA	-0.129951	0.69046	-0.911533	0.368329	0.889235
MIMAT0003453	mmu-miR-497-5p	miRNA	-0.130034	0.402414	-0.959335	0.344053	0.87629
MIMAT0003129	mmu-miR-485-3p	miRNA	-0.131308	0.548591	-1.04913	0.301398	0.864763
MIMAT0003500	mmu-miR-710	miRNA	-0.131364	0.560065	-0.905621	0.371407	0.889235
MIMAT0014856	mmu-miR-3074-5p	miRNA	-0.131926	0.572786	-0.884635	0.382466	0.898331
MIMAT0017273	mmu-miR-421-5p	miRNA	-0.132134	0.0981488	-1.3614	0.182197	0.803985
MIMAT0000139	mmu-miR-127-3p	miRNA	-0.132722	0.493575	-1.17959	0.246218	0.833899
MIMAT0017225	mmu-miR-302d-5p	miRNA	-0.132894	0.426472	-0.942213	0.352623	0.881941
MIMAT0027990	mmu-miR-7043-5p	miRNA	-0.133553	0.609614	-1.09144	0.282631	0.852816
MIMAT0025175	mmu-miR-6419	miRNA	-0.133911	0.0865067	-1.16574	0.2517	0.833899
MIMAT0027873	mmu-miR-6985-3p	miRNA	-0.134044	0.322468	-1.1441	0.260444	0.835242
MIMAT0025120	mmu-miR-6376	miRNA	-0.134277	0.538346	-1.18308	0.244851	0.833899
MIMAT0028032	mmu-miR-7064-5p	miRNA	-0.134462	0.714202	-0.574203	0.569549	0.953456
MIMAT0004842	mmu-miR-879-5p	miRNA	-0.134466	0.279919	-1.11293	0.27342	0.84237
MIMAT0017057	mmu-miR-320-5p	miRNA	-0.13508	0.323847	-1.13841	0.26278	0.836278
MIMAT0027935	mmu-miR-7015-3p	miRNA	-0.13556	0.47324	-1.03817	0.306399	0.86553
MIMAT0025149	mmu-miR-6397	miRNA	-0.135644	0.29407	-1.03885	0.306089	0.86553
MIMAT0015641	mmu-miR-3470b	miRNA	-0.136778	0.440445	-0.962131	0.342667	0.87629
MIMAT0000658	mmu-miR-210-3p	miRNA	-0.136942	2.38884	-0.157481	0.875782	0.993175
MIMAT0004935	mmu-miR-872-3p	miRNA	-0.137109	0.338859	-1.14352	0.260681	0.835242
MIMAT0025096	mmu-miR-6353	miRNA	-0.13714	0.20498	-1.32722	0.193137	0.81778
MIMAT0031395	mmu-miR-8094	miRNA	-0.137218	0.5355	-0.785574	0.437469	0.92684
MIMAT0027933	mmu-miR-7014-3p	miRNA	-0.137301	0.215542	-1.55235	0.129688	0.750061
MIMAT0003728	mmu-miR-374b-3p	miRNA	-0.137604	0.484036	-1.25269	0.21873	0.825795
MIMAT0029807	mmu-miR-219b-3p	miRNA	-0.137699	0.274852	-1.01921	0.315184	0.86553
MIMAT0028431	mmu-miR-7231-3p	miRNA	-0.13886	0.47957	-1.15554	0.255796	0.833899
MIMAT0003729	mmu-miR-216b-5p	miRNA	-0.139364	0.451172	-1.13199	0.265431	0.836278
MIMAT0028003	mmu-miR-7049-3p	miRNA	-0.139573	0.391375	-1.12186	0.269655	0.837952
MIMAT0009416	mmu-miR-1949	miRNA	-0.140235	0.600257	-0.70904	0.483056	0.934125
MIMAT0014847	mmu-miR-3070a-3p	miRNA	-0.140278	0.682528	-0.734331	0.4677	0.934125
MIMAT0000536	mmu-miR-29c-3p	miRNA	-0.141005	0.488947	-1.12476	0.268443	0.837441
MIMAT0027875	mmu-miR-6986-3p	miRNA	-0.1413	0.398208	-1.06864	0.292639	0.855502
MIMAT0000369	mmu-miR-292-5p	miRNA	-0.141703	0.596218	-0.775181	0.443504	0.931945
MIMAT0029905	mmu-miR-1258-3p	miRNA	-0.142268	0.69247	-1.15359	0.256584	0.833899
MIMAT0028130	mmu-miR-7116-3p	miRNA	-0.142403	0.677199	-1.01575	0.316809	0.86553
MIMAT0000379	mmu-miR-301a-3p	miRNA	-0.142499	0.169285	-1.19686	0.239507	0.833899
MIMAT0027844	mmu-miR-6971-5p	miRNA	-0.142686	1.06839	-0.310125	0.758328	0.980729
MIMAT0020610	mmu-miR-5103	miRNA	-0.143312	0.578737	-1.21385	0.233033	0.833899
MIMAT0000215	mmu-miR-186-5p	miRNA	-0.14345	0.412979	-0.814719	0.420812	0.920806
MIMAT0004941	mmu-miR-544-3p	miRNA	-0.143493	0.408594	-1.45669	0.154228	0.780676
MIMAT0007863	mmu-miR-1902	miRNA	-0.14353	0.599051	-0.552299	0.584298	0.961375
MIMAT0005292	mmu-miR-582-3p	miRNA	-0.143699	0.404991	-1.38744	0.174188	0.791858
MIMAT0003455	mmu-miR-679-5p	miRNA	-0.143815	0.600999	-1.16169	0.25332	0.833899
MIMAT0003388	mmu-miR-376b-5p	miRNA	-0.144353	0.321723	-1.34632	0.186962	0.808522
MIMAT0004853	mmu-miR-874-3p	miRNA	-0.144568	0.727542	-0.577649	0.567246	0.953456
MIMAT0005842	mmu-miR-669h-3p	miRNA	-0.144899	0.780003	-0.631926	0.531593	0.942101
MIMAT0028449	mmu-miR-7240-3p	miRNA	-0.145211	0.42701	-1.08694	0.284586	0.85498
MIMAT0029835	mmu-miR-7664-3p	miRNA	-0.145334	0.197417	-1.17972	0.246167	0.833899
MIMAT0004521	mmu-miR-15b-3p	miRNA	-0.145454	0.556642	-1.04338	0.304014	0.86553
MIMAT0014904	mmu-miR-3091-3p	miRNA	-0.145988	0.362005	-1.00146	0.323565	0.86553
MIMAT0022504	mmu-miR-5709-5p	miRNA	-0.147589	0.49295	-1.31426	0.197416	0.81931
MIMAT0017072	mmu-miR-217-3p	miRNA	-0.14759	0.830184	-0.985046	0.331447	0.86553
MIMAT0019340	mmu-miR-3962	miRNA	-0.147758	0.735149	-0.80503	0.426306	0.921546
MIMAT0001637	mmu-miR-452-5p	miRNA	-0.14894	0.324708	-1.20757	0.235411	0.833899
MIMAT0028397	mmu-miR-7214-3p	miRNA	-0.149401	0.750566	-0.906116	0.371149	0.889235
MIMAT0017180	mmu-miR-449a-3p	miRNA	-0.14942	0.123268	-1.41258	0.166722	0.785242
MIMAT0004546	mmu-miR-202-5p	miRNA	-0.149643	0.946983	-0.49185	0.625935	0.969356
MIMAT0000664	mmu-miR-219a-5p	miRNA	-0.149891	0.336864	-1.44961	0.156183	0.780676
MIMAT0000373	mmu-miR-295-3p	miRNA	-0.150153	0.245154	-1.28256	0.208182	0.821897
MIMAT0003488	mmu-miR-698-3p	miRNA	-0.150296	0.337037	-1.13073	0.265953	0.836278
MIMAT0003736	mmu-miR-670-5p	miRNA	-0.15087	0.455972	-1.22086	0.230404	0.833899
MIMAT0027904	mmu-miR-7001-5p	miRNA	-0.150927	3.60342	-0.153405	0.878971	0.993175
MIMAT0004580	mmu-miR-34c-3p	miRNA	-0.151065	0.652783	-0.845616	0.403583	0.917495
MIMAT0027841	mmu-miR-6969-3p	miRNA	-0.151639	0.109689	-1.31798	0.196179	0.81906
MIMAT0020638	mmu-miR-5127	miRNA	-0.152096	0.643624	-0.967548	0.339992	0.874951
MIMAT0029862	mmu-miR-129b-5p	miRNA	-0.152356	0.336718	-1.25461	0.218038	0.825795
MIMAT0029821	mmu-miR-7657-3p	miRNA	-0.152383	0.450674	-1.4146	0.166131	0.785242
MIMAT0004844	mmu-miR-880-3p	miRNA	-0.152568	0.240087	-1.33367	0.191035	0.817253
MIMAT0017328	mmu-miR-1188-3p	miRNA	-0.152579	0.743655	-0.741817	0.46321	0.934125
MIMAT0003186	mmu-miR-369-3p	miRNA	-0.153185	0.27681	-1.07727	0.288824	0.855502
MIMAT0027958	mmu-miR-7027-5p	miRNA	-0.153444	0.275435	-1.20507	0.236361	0.833899
MIMAT0027925	mmu-miR-7010-3p	miRNA	-0.153445	0.305111	-1.24287	0.222282	0.828349
MIMAT0004942	mmu-miR-598-3p	miRNA	-0.154266	0.427833	-1.27528	0.210715	0.82386
MIMAT0028029	mmu-miR-7062-3p	miRNA	-0.154429	0.455198	-0.884047	0.382779	0.898331
MIMAT0022369	mmu-miR-5621-5p	miRNA	-0.154949	0.480516	-0.965148	0.341176	0.874951
MIMAT0004625	mmu-miR-16-1-3p	miRNA	-0.155215	0.631474	-0.854429	0.398751	0.914912
MIMAT0027850	mmu-miR-6974-5p	miRNA	-0.155783	0.808286	-0.620483	0.53901	0.942101
MIMAT0029806	mmu-miR-219b-5p	miRNA	-0.155996	0.421674	-1.36212	0.181971	0.803985
MIMAT0029879	mmu-miR-3620-3p	miRNA	-0.156322	1.24296	-0.276431	0.783863	0.982514
MIMAT0017169	mmu-miR-215-3p	miRNA	-0.156652	0.424865	-1.19784	0.239131	0.833899
MIMAT0025155	mmu-miR-6403	miRNA	-0.15713	0.168029	-1.20752	0.235433	0.833899
MIMAT0005844	mmu-miR-466f	miRNA	-0.157605	0.628781	-0.683056	0.499125	0.934125
MIMAT0014833	mmu-miR-3063-3p	miRNA	-0.157667	0.582605	-0.952866	0.347275	0.87629
MIMAT0001546	mmu-miR-450a-5p	miRNA	-0.157904	0.535923	-1.02022	0.314711	0.86553
MIMAT0028453	mmu-miR-7242-3p	miRNA	-0.158169	0.544427	-0.993951	0.327155	0.86553
MIMAT0027700	mmu-miR-6900-5p	miRNA	-0.158375	0.978636	-0.570898	0.571763	0.956111
MIMAT0028086	mmu-miR-7090-5p	miRNA	-0.158731	0.680107	-1.11748	0.271496	0.841591
MIMAT0029847	mmu-miR-7670-3p	miRNA	-0.158921	0.421709	-1.1279	0.267132	0.836278
MIMAT0029888	mmu-miR-216c-5p	miRNA	-0.159038	0.475678	-0.994726	0.326783	0.86553
MIMAT0027949	mmu-miR-7022-3p	miRNA	-0.159435	0.932937	-0.656929	0.515577	0.937929
MIMAT0029856	mmu-miR-7674-5p	miRNA	-0.159714	0.53822	-0.72969	0.470497	0.934125
MIMAT0000654	mmu-miR-32-5p	miRNA	-0.160326	0.62389	-0.471176	0.640476	0.969356
MIMAT0016985	mmu-miR-134-3p	miRNA	-0.160696	0.383808	-1.3718	0.178965	0.803985
MIMAT0029881	mmu-miR-465d-3p	miRNA	-0.161141	0.537698	-0.967445	0.340043	0.874951
MIMAT0029899	mmu-miR-7686-3p	miRNA	-0.162022	0.334726	-1.00519	0.321791	0.86553
MIMAT0004620	mmu-let-7a-1-3p	miRNA	-0.162223	0.29156	-1.53951	0.132786	0.750061
MIMAT0005439	mmu-let-7c-2-3p	miRNA	-0.162223	0.29156	-1.53951	0.132786	0.750061
MIMAT0017240	mmu-miR-802-3p	miRNA	-0.162358	0.543059	-1.13452	0.264383	0.836278
MIMAT0028416	mmu-miR-7224-5p	miRNA	-0.162462	0.391137	-1.00289	0.322885	0.86553
MIMAT0027760	mmu-miR-6930-5p	miRNA	-0.162714	0.890509	-0.926134	0.360799	0.889235
MIMAT0022505	mmu-miR-5710	miRNA	-0.163032	0.540904	-1.32165	0.194967	0.81906
MIMAT0004626	mmu-miR-18a-3p	miRNA	-0.164445	1.26842	-0.325479	0.746781	0.977269
MIMAT0027739	mmu-miR-6919-3p	miRNA	-0.16457	0.549661	-1.35782	0.18332	0.803985
MIMAT0027820	mmu-miR-6960-5p	miRNA	-0.164706	0.29844	-1.24464	0.221638	0.828349
MIMAT0027803	mmu-miR-6951-3p	miRNA	-0.164956	0.663349	-1.16859	0.250564	0.833899
MIMAT0000517	mmu-miR-192-5p	miRNA	-0.165142	0.799626	-0.9734	0.337118	0.873942
MIMAT0003513	mmu-miR-505-3p	miRNA	-0.165402	0.421404	-1.72861	0.0928041	0.710552
MIMAT0028079	mmu-miR-7086-3p	miRNA	-0.165502	0.291047	-1.52619	0.136063	0.750234
MIMAT0027891	mmu-miR-6994-3p	miRNA	-0.165553	0.547506	-1.53686	0.133433	0.750061
MIMAT0003780	mmu-miR-490-3p	miRNA	-0.166955	0.517267	-1.25193	0.219	0.825795
MIMAT0004822	mmu-miR-770-5p	miRNA	-0.167118	0.40149	-1.35227	0.185073	0.806207
MIMAT0027961	mmu-miR-7028-3p	miRNA	-0.167769	0.493031	-1.1169	0.27174	0.841591
MIMAT0003889	mmu-miR-758-3p	miRNA	-0.167811	0.054429	-1.96006	0.0580905	0.640674
MIMAT0004237	mmu-miR-742-3p	miRNA	-0.167857	0.680528	-1.15567	0.255743	0.833899
MIMAT0003478	mmu-miR-467b-3p	miRNA	-0.167973	0.560241	-1.1407	0.261839	0.836278
MIMAT0025581	mmu-miR-6537-5p	miRNA	-0.168069	0.524986	-1.148	0.258853	0.835242
MIMAT0005293	mmu-miR-467e-5p	miRNA	-0.168272	0.714887	-1.07445	0.290065	0.855502
MIMAT0014813	mmu-miR-3058-5p	miRNA	-0.168415	0.627149	-0.934486	0.356537	0.885771
MIMAT0001542	mmu-miR-449a-5p	miRNA	-0.168495	0.396075	-1.18822	0.242848	0.833899
MIMAT0007869	mmu-miR-1899	miRNA	-0.169216	0.489853	-1.28711	0.206609	0.821897
MIMAT0025143	mmu-miR-6393	miRNA	-0.169395	0.701646	-1.0709	0.291636	0.855502
MIMAT0029868	mmu-miR-7677-5p	miRNA	-0.170005	0.864683	-0.690925	0.494227	0.934125
MIMAT0020367	mmu-miR-3473b	miRNA	-0.170838	3.31689	-0.185556	0.853878	0.99273
MIMAT0031398	mmu-miR-8096	miRNA	-0.171894	0.691274	-0.948308	0.349557	0.878182
MIMAT0017216	mmu-miR-487b-5p	miRNA	-0.171907	0.442484	-1.17305	0.248797	0.833899
MIMAT0000582	mmu-miR-338-3p	miRNA	-0.171907	0.531571	-1.19141	0.241612	0.833899
MIMAT0001419	mmu-miR-433-5p	miRNA	-0.172281	0.213446	-1.30972	0.198929	0.81931
MIMAT0014924	mmu-miR-344e-3p	miRNA	-0.172386	0.514881	-1.3662	0.180699	0.803985
MIMAT0028394	mmu-miR-7213-5p	miRNA	-0.173422	0.205109	-1.79116	0.0820288	0.698705
MIMAT0014961	mmu-miR-344d-2-5p	miRNA	-0.174272	0.780468	-1.07221	0.291056	0.855502
MIMAT0027889	mmu-miR-6993-3p	miRNA	-0.174294	0.357785	-1.4019	0.169863	0.788968
MIMAT0027972	mmu-miR-7034-5p	miRNA	-0.174945	0.454269	-1.35667	0.183681	0.803985
MIMAT0004933	mmu-miR-878-3p	miRNA	-0.175278	0.430325	-1.36903	0.179823	0.803985
MIMAT0029894	mmu-miR-126b-5p	miRNA	-0.175671	0.796616	-0.999338	0.324576	0.86553
MIMAT0019341	mmu-miR-3963	miRNA	-0.176265	0.28864	-1.30073	0.201956	0.821897
MIMAT0002108	mmu-miR-467a-3p	miRNA	-0.176382	0.511302	-1.51582	0.138659	0.750234
MIMAT0003487	mmu-miR-697	miRNA	-0.176854	0.277841	-1.51449	0.138993	0.750234
MIMAT0009393	mmu-miR-1930-5p	miRNA	-0.177344	1.01256	-0.639787	0.52653	0.942101
MIMAT0028090	mmu-miR-7092-5p	miRNA	-0.177398	1.2233	-0.459084	0.649048	0.970004
MIMAT0027791	mmu-miR-6945-3p	miRNA	-0.177584	0.682807	-1.3253	0.193766	0.81793
MIMAT0003501	mmu-miR-711	miRNA	-0.178025	0.840614	-0.636181	0.528849	0.942101
MIMAT0000163	mmu-miR-153-3p	miRNA	-0.179136	0.49801	-1.36524	0.180999	0.803985
MIMAT0027725	mmu-miR-6912-3p	miRNA	-0.179403	0.392834	-1.19896	0.2387	0.833899
MIMAT0027771	mmu-miR-6935-3p	miRNA	-0.179665	0.451621	-1.4434	0.157912	0.781886
MIMAT0014938	mmu-miR-3103-3p	miRNA	-0.180682	0.207363	-1.51964	0.137697	0.750234
MIMAT0027790	mmu-miR-6945-5p	miRNA	-0.181125	0.631374	-1.09203	0.282372	0.852816
MIMAT0000743	mmu-miR-379-5p	miRNA	-0.181197	0.416281	-1.47247	0.149942	0.775308
MIMAT0017236	mmu-miR-551b-5p	miRNA	-0.182019	0.538369	-1.21026	0.234391	0.833899
MIMAT0004210	mmu-miR-804	miRNA	-0.182931	0.370174	-1.82162	0.0771766	0.691328
MIMAT0025153	mmu-miR-6401	miRNA	-0.183157	0.469646	-1.45154	0.155648	0.780676
MIMAT0029800	mmu-miR-7649-5p	miRNA	-0.184383	0.670379	-1.32672	0.193301	0.81778
MIMAT0027705	mmu-miR-6902-3p	miRNA	-0.184423	0.394043	-1.52392	0.136628	0.750234
MIMAT0022503	mmu-miR-344i	miRNA	-0.184429	0.490893	-1.35379	0.184589	0.80594
MIMAT0003737	mmu-miR-666-5p	miRNA	-0.186278	0.274956	-2.01448	0.0517929	0.625449
MIMAT0017037	mmu-miR-341-5p	miRNA	-0.186757	0.658255	-1.26985	0.21262	0.82455
MIMAT0027776	mmu-miR-6938-5p	miRNA	-0.187273	0.441201	-1.69498	0.0990729	0.715293
MIMAT0017011	mmu-miR-30d-3p	miRNA	-0.187455	0.360448	-1.53273	0.134445	0.750061
MIMAT0004656	mmu-miR-345-3p	miRNA	-0.187694	1.24562	-0.720864	0.475841	0.934125
MIMAT0031414	mmu-miR-1668	miRNA	-0.188571	0.275157	-1.83573	0.0750144	0.691328
MIMAT0003168	mmu-miR-543-3p	miRNA	-0.189147	0.409575	-1.78591	0.0828907	0.698705
MIMAT0029792	mmu-miR-6546-5p	miRNA	-0.189371	0.487781	-1.47382	0.149582	0.775308
MIMAT0003492	mmu-miR-702-3p	miRNA	-0.18982	0.827273	-0.863964	0.393564	0.911619
MIMAT0028014	mmu-miR-7055-5p	miRNA	-0.189897	0.330243	-1.56687	0.126256	0.750061
MIMAT0027795	mmu-miR-6947-3p	miRNA	-0.190579	0.278349	-1.82309	0.0769494	0.691328
MIMAT0004526	mmu-miR-101a-5p	miRNA	-0.190704	0.650934	-1.258	0.216826	0.825795
MIMAT0014836	mmu-miR-3065-5p	miRNA	-0.19115	0.590145	-1.23139	0.226491	0.829852
MIMAT0029827	mmu-miR-7660-3p	miRNA	-0.191237	0.530416	-1.40869	0.167861	0.785242
MIMAT0017275	mmu-miR-467c-3p	miRNA	-0.19157	0.528651	-1.08601	0.284993	0.85498
MIMAT0017018	mmu-miR-16-2-3p	miRNA	-0.191627	0.443055	-1.36056	0.182459	0.803985
MIMAT0022364	mmu-miR-5618-3p	miRNA	-0.191961	0.357118	-1.2345	0.225344	0.829852
MIMAT0004537	mmu-miR-154-3p	miRNA	-0.192733	0.208525	-1.73225	0.0921453	0.710552
MIMAT0014845	mmu-miR-3069-3p	miRNA	-0.192857	0.511066	-1.3454	0.187256	0.808522
MIMAT0028442	mmu-miR-7237-5p	miRNA	-0.194542	0.665585	-1.16925	0.250305	0.833899
MIMAT0004324	mmu-miR-181d-5p	miRNA	-0.194729	0.782939	-0.578933	0.566389	0.953456
MIMAT0029887	mmu-miR-7683-3p	miRNA	-0.194789	0.451249	-1.08086	0.287246	0.855502
MIMAT0029865	mmu-miR-292b-3p	miRNA	-0.196039	0.372057	-1.64261	0.109533	0.741096
MIMAT0020636	mmu-miR-3572-3p	miRNA	-0.196501	0.458812	-1.4163	0.165639	0.785242
MIMAT0007875	mmu-miR-1898	miRNA	-0.196568	0.924215	-0.647004	0.521904	0.941203
MIMAT0005852	mmu-miR-1194	miRNA	-0.196641	0.388957	-1.97285	0.0565532	0.638482
MIMAT0027945	mmu-miR-7020-3p	miRNA	-0.196816	0.601592	-1.62321	0.113633	0.743993
MIMAT0025142	mmu-miR-6392-3p	miRNA	-0.197175	0.428946	-0.920608	0.363637	0.889235
MIMAT0017044	mmu-miR-135b-3p	miRNA	-0.197427	0.554261	-1.33373	0.191017	0.817253
MIMAT0014809	mmu-miR-1298-5p	miRNA	-0.198012	0.410539	-1.59441	0.119949	0.750061
MIMAT0025132	mmu-miR-130c	miRNA	-0.198026	0.232798	-1.73844	0.0910367	0.710552
MIMAT0004760	mmu-miR-470-3p	miRNA	-0.198092	0.7044	-1.01702	0.316209	0.86553
MIMAT0025100	mmu-miR-6357	miRNA	-0.198133	0.476354	-1.73425	0.0917867	0.710552
MIMAT0028403	mmu-miR-7217-3p	miRNA	-0.198423	0.563397	-1.49213	0.144738	0.763599
MIMAT0027104	mmu-miR-5709-3p	miRNA	-0.198761	0.422565	-1.81365	0.0784224	0.691871
MIMAT0025113	mmu-miR-6369	miRNA	-0.199093	0.269119	-1.97519	0.0562758	0.638482
MIMAT0017006	mmu-miR-143-5p	miRNA	-0.199755	0.514364	-1.41564	0.16583	0.785242
MIMAT0027903	mmu-miR-7000-3p	miRNA	-0.200451	0.51244	-1.4395	0.159007	0.783939
MIMAT0017021	mmu-miR-96-3p	miRNA	-0.200653	0.378835	-1.74417	0.0900184	0.710552
MIMAT0000149	mmu-miR-137-3p	miRNA	-0.200714	0.47146	-1.53426	0.13407	0.750061
MIMAT0005291	mmu-miR-582-5p	miRNA	-0.201519	0.652989	-1.33598	0.190286	0.817253
MIMAT0014926	mmu-miR-344b-3p	miRNA	-0.201636	0.41237	-1.8693	0.070073	0.677493
MIMAT0014922	mmu-miR-3101-3p	miRNA	-0.201674	0.146625	-1.84265	0.0739711	0.691328
MIMAT0002111	mmu-miR-470-5p	miRNA	-0.20221	0.950534	-0.904232	0.372133	0.889235
MIMAT0025163	mmu-miR-6410	miRNA	-0.20293	0.447939	-1.69001	0.100027	0.717489
MIMAT0029866	mmu-miR-1191b-5p	miRNA	-0.203086	0.727192	-1.24552	0.221319	0.828349
MIMAT0005840	mmu-miR-669i	miRNA	-0.204661	0.754418	-0.966296	0.340609	0.874951
MIMAT0027953	mmu-miR-7024-3p	miRNA	-0.205322	0.489874	-1.29719	0.203158	0.821897
MIMAT0022841	mmu-miR-219a-2-3p	miRNA	-0.205447	0.411696	-1.39882	0.170778	0.788968
MIMAT0017267	mmu-miR-190b-3p	miRNA	-0.205566	0.523845	-1.46044	0.153199	0.780676
MIMAT0027927	mmu-miR-7011-3p	miRNA	-0.206285	0.43346	-1.31946	0.195689	0.81906
MIMAT0003498	mmu-miR-708-3p	miRNA	-0.206353	0.341873	-1.45691	0.154167	0.780676
MIMAT0027837	mmu-miR-6967-3p	miRNA	-0.206355	0.536046	-1.69355	0.0993463	0.715293
MIMAT0017054	mmu-miR-216a-3p	miRNA	-0.206397	0.180129	-1.78233	0.0834823	0.698705
MIMAT0017170	mmu-miR-196b-3p	miRNA	-0.206409	0.675434	-0.998171	0.325134	0.86553
MIMAT0028409	mmu-miR-7220-3p	miRNA	-0.206571	0.822417	-1.10704	0.275924	0.844606
MIMAT0027344	mmu-miR-6516-3p	miRNA	-0.207924	0.216394	-1.97677	0.0560895	0.638482
MIMAT0019338	mmu-miR-3961	miRNA	-0.20798	0.370466	-1.92185	0.0629007	0.648728
MIMAT0027805	mmu-miR-6952-3p	miRNA	-0.208554	0.551749	-1.59132	0.120643	0.750061
MIMAT0014959	mmu-miR-3113-5p	miRNA	-0.208745	0.491874	-1.79264	0.0817879	0.698705
MIMAT0028088	mmu-miR-7091-5p	miRNA	-0.209277	0.559675	-1.81197	0.0786876	0.691871
MIMAT0009406	mmu-miR-1941-3p	miRNA	-0.212616	0.621574	-1.51422	0.139063	0.750234
MIMAT0012772	mmu-miR-599	miRNA	-0.213326	0.422586	-1.64875	0.10826	0.735091
MIMAT0027789	mmu-miR-6944-3p	miRNA	-0.216705	0.357002	-1.60142	0.118387	0.750061
MIMAT0014908	mmu-miR-3093-3p	miRNA	-0.216743	0.72566	-0.866222	0.392342	0.910862
MIMAT0028061	mmu-miR-7077-3p	miRNA	-0.216975	0.471735	-2.12811	0.0405371	0.575692
MIMAT0027913	mmu-miR-7004-3p	miRNA	-0.218366	0.802516	-0.753772	0.456091	0.934125
MIMAT0027758	mmu-miR-6929-5p	miRNA	-0.219337	0.704217	-1.09416	0.281453	0.852816
MIMAT0004937	mmu-miR-875-5p	miRNA	-0.219596	0.378481	-1.60882	0.116754	0.750061
MIMAT0025108	mmu-miR-6364	miRNA	-0.219613	0.509731	-1.26077	0.215836	0.825795
MIMAT0025140	mmu-miR-6391	miRNA	-0.221858	0.564881	-1.11096	0.274257	0.84237
MIMAT0004837	mmu-miR-615-5p	miRNA	-0.223393	0.551824	-1.5137	0.139194	0.750234
MIMAT0027911	mmu-miR-7003-3p	miRNA	-0.223436	0.456728	-1.29451	0.204072	0.821897
MIMAT0007870	mmu-miR-1900	miRNA	-0.223531	0.702343	-1.37306	0.178578	0.803985
MIMAT0004789	mmu-miR-450a-2-3p	miRNA	-0.223727	0.704772	-1.56339	0.127072	0.750061
MIMAT0028025	mmu-miR-7060-3p	miRNA	-0.225012	0.0571746	-2.10887	0.0422758	0.575692
MIMAT0014905	mmu-miR-3092-5p	miRNA	-0.225608	0.590834	-1.03889	0.306069	0.86553
MIMAT0014941	mmu-miR-3105-5p	miRNA	-0.226734	0.45887	-1.66021	0.10592	0.73406
MIMAT0027915	mmu-miR-7005-3p	miRNA	-0.226879	0.272601	-1.82393	0.0768189	0.691328
MIMAT0000670	mmu-miR-222-3p	miRNA	-0.227114	4.29407	-0.159665	0.874074	0.993175
MIMAT0027973	mmu-miR-7034-3p	miRNA	-0.227326	0.419478	-1.59592	0.119611	0.750061
MIMAT0004236	mmu-miR-741-3p	miRNA	-0.227856	0.549084	-1.92572	0.0623984	0.648728
MIMAT0009408	mmu-miR-1943-5p	miRNA	-0.227924	0.579568	-1.4093	0.167682	0.785242
MIMAT0017327	mmu-miR-669f-5p	miRNA	-0.228189	0.946997	-0.624455	0.53643	0.942101
MIMAT0017051	mmu-miR-100-3p	miRNA	-0.230165	0.283831	-2.26593	0.0298289	0.493817
MIMAT0022379	mmu-miR-5625-5p	miRNA	-0.230267	0.673186	-1.38958	0.173545	0.791858
MIMAT0027750	mmu-miR-6925-5p	miRNA	-0.23045	0.652234	-1.18427	0.244385	0.833899
MIMAT0029889	mmu-miR-216c-3p	miRNA	-0.230672	0.14003	-1.73596	0.0914793	0.710552
MIMAT0029840	mmu-miR-7667-5p	miRNA	-0.230729	0.452058	-1.45027	0.156	0.780676
MIMAT0000160	mmu-miR-150-5p	miRNA	-0.230757	3.02706	-0.185895	0.853614	0.99273
MIMAT0000238	mmu-miR-205-5p	miRNA	-0.231393	0.656782	-1.54288	0.131967	0.750061
MIMAT0016990	mmu-miR-149-3p	miRNA	-0.231961	8.04965	-0.243413	0.809124	0.984531
MIMAT0019346	mmu-miR-1843b-3p	miRNA	-0.232812	0.690304	-1.57868	0.12352	0.750061
MIMAT0028441	mmu-miR-7236-3p	miRNA	-0.233573	0.67985	-1.58661	0.121709	0.750061
MIMAT0017268	mmu-miR-874-5p	miRNA	-0.23424	0.66426	-1.17878	0.246538	0.833899
MIMAT0009405	mmu-miR-1941-5p	miRNA	-0.236636	1.90547	-0.410424	0.684028	0.973722
MIMAT0031406	mmu-miR-8102	miRNA	-0.237025	1.34867	-0.73843	0.465238	0.934125
MIMAT0004858	mmu-miR-18b-5p	miRNA	-0.237753	0.170575	-2.18246	0.0359625	0.54411
MIMAT0000133	mmu-miR-101a-3p	miRNA	-0.237827	0.409869	-1.7128	0.0957085	0.710552
MIMAT0028005	mmu-miR-7050-3p	miRNA	-0.23787	0.470114	-1.22847	0.227571	0.831812
MIMAT0016979	mmu-miR-1a-1-5p	miRNA	-0.238033	0.632387	-1.65175	0.107643	0.73406
MIMAT0027714	mmu-miR-6907-5p	miRNA	-0.238287	0.597741	-1.72462	0.0935298	0.710552
MIMAT0014915	mmu-miR-3097-5p	miRNA	-0.239068	0.815625	-1.44244	0.15818	0.781886
MIMAT0017022	mmu-miR-34a-3p	miRNA	-0.240167	0.559812	-1.93374	0.0613683	0.648728
MIMAT0015645	mmu-miR-3473a	miRNA	-0.240348	1.60915	-0.599681	0.55263	0.946964
MIMAT0003711	mmu-miR-652-3p	miRNA	-0.240744	4.56594	-0.141144	0.888576	0.993175
MIMAT0014910	mmu-miR-3094-3p	miRNA	-0.242062	0.432098	-2.11206	0.0419834	0.575692
MIMAT0000236	mmu-miR-203-3p	miRNA	-0.242335	0.512963	-1.652	0.107592	0.73406
MIMAT0027731	mmu-miR-6915-3p	miRNA	-0.243177	0.627179	-1.18798	0.242942	0.833899
MIMAT0028432	mmu-miR-7232-5p	miRNA	-0.24421	0.678325	-1.46537	0.151858	0.780676
MIMAT0004638	mmu-miR-323-5p	miRNA	-0.245678	0.570895	-1.7484	0.0892733	0.710552
MIMAT0029841	mmu-miR-7667-3p	miRNA	-0.245997	0.162703	-2.22788	0.0324985	0.504123
MIMAT0027897	mmu-miR-6997-3p	miRNA	-0.246381	0.416531	-1.86768	0.0703059	0.677493
MIMAT0009430	mmu-miR-1957a	miRNA	-0.24663	0.811304	-0.928951	0.359357	0.889235
MIMAT0028390	mmu-miR-7211-5p	miRNA	-0.246997	0.58621	-1.44771	0.156708	0.780676
MIMAT0017195	mmu-miR-471-3p	miRNA	-0.24761	0.462361	-1.77136	0.0853191	0.702937
MIMAT0003491	mmu-miR-701-5p	miRNA	-0.247645	0.77912	-1.50388	0.141697	0.754836
MIMAT0027869	mmu-miR-6983-3p	miRNA	-0.248048	0.325973	-1.84566	0.0735217	0.691032
MIMAT0004857	mmu-miR-147-3p	miRNA	-0.248656	0.567524	-1.66173	0.105611	0.73406
MIMAT0017253	mmu-miR-669c-3p	miRNA	-0.248717	0.351342	-1.76981	0.0855817	0.702937
MIMAT0000660	mmu-miR-181a-1-3p	miRNA	-0.249313	0.278061	-1.74401	0.0900464	0.710552
MIMAT0004854	mmu-miR-876-5p	miRNA	-0.249496	0.723222	-1.28253	0.208193	0.821897
MIMAT0027757	mmu-miR-6928-3p	miRNA	-0.249514	0.119736	-1.55681	0.128627	0.750061
MIMAT0025133	mmu-miR-6386	miRNA	-0.24977	0.618336	-1.42829	0.162183	0.785242
MIMAT0020626	mmu-miR-5118	miRNA	-0.250038	0.359837	-1.73095	0.0923805	0.710552
MIMAT0027796	mmu-miR-6948-5p	miRNA	-0.250702	0.33151	-1.9803	0.055675	0.638482
MIMAT0027882	mmu-miR-6990-5p	miRNA	-0.251103	0.282412	-1.63358	0.111426	0.742144
MIMAT0014952	mmu-miR-3110-3p	miRNA	-0.258266	0.515427	-1.42068	0.164368	0.785242
MIMAT0004629	mmu-miR-22-5p	miRNA	-0.258866	0.243117	-1.92368	0.0626622	0.648728
MIMAT0029811	mmu-miR-7652-3p	miRNA	-0.25925	0.2031	-2.28868	0.0283288	0.489748
MIMAT0000157	mmu-miR-145a-5p	miRNA	-0.260175	0.565194	-1.13352	0.264796	0.836278
MIMAT0027942	mmu-miR-7019-5p	miRNA	-0.261797	0.796804	-0.984993	0.331473	0.86553
MIMAT0029896	mmu-miR-7685-5p	miRNA	-0.26242	0.698255	-1.47966	0.148022	0.771655
MIMAT0017242	mmu-miR-670-3p	miRNA	-0.264118	0.634905	-1.95076	0.0592315	0.643666
MIMAT0027811	mmu-miR-6955-3p	miRNA	-0.264711	0.375777	-2.05966	0.0470261	0.603433
MIMAT0031401	mmu-miR-8099	miRNA	-0.265251	0.90687	-1.15419	0.256339	0.833899
MIMAT0027991	mmu-miR-7043-3p	miRNA	-0.265732	0.529009	-1.90483	0.0651503	0.657708
MIMAT0000668	mmu-miR-211-5p	miRNA	-0.266541	0.495053	-2.43488	0.0202039	0.399946
MIMAT0020621	mmu-miR-5113	miRNA	-0.266831	0.849594	-1.25757	0.216979	0.825795
MIMAT0027767	mmu-miR-6933-3p	miRNA	-0.266916	0.504283	-1.63705	0.110694	0.741646
MIMAT0019353	mmu-miR-3969	miRNA	-0.267925	0.0174379	-2.77594	0.00882383	0.268756
MIMAT0004579	mmu-miR-302a-5p	miRNA	-0.268534	0.575348	-1.28304	0.208016	0.821897
MIMAT0027893	mmu-miR-6995-3p	miRNA	-0.268939	0.30419	-1.88595	0.0677281	0.66956
MIMAT0003727	mmu-miR-374b-5p	miRNA	-0.269038	0.227789	-2.58988	0.0139577	0.346093
MIMAT0020616	mmu-miR-5108	miRNA	-0.269818	0.394273	-2.01841	0.0513618	0.624193
MIMAT0005858	mmu-miR-1197-3p	miRNA	-0.270894	0.575392	-2.11636	0.0415908	0.575692
MIMAT0029854	mmu-miR-3569-5p	miRNA	-0.275366	0.379337	-1.83022	0.0758523	0.691328
MIMAT0027799	mmu-miR-6949-3p	miRNA	-0.276884	0.91929	-1.69882	0.0983391	0.715293
MIMAT0025103	mmu-miR-6360	miRNA	-0.277456	0.399381	-2.4833	0.0180217	0.390743
MIMAT0003725	mmu-miR-675-5p	miRNA	-0.278024	0.420963	-1.98055	0.0556456	0.638482
MIMAT0014857	mmu-miR-3074-1-3p	miRNA	-0.278033	0.635335	-0.799008	0.429743	0.921546
MIMAT0027786	mmu-miR-6943-5p	miRNA	-0.278515	0.646853	-1.62214	0.113861	0.743993
MIMAT0003726	mmu-miR-675-3p	miRNA	-0.27853	0.293852	-2.28786	0.0283813	0.489748
MIMAT0017331	mmu-miR-1197-5p	miRNA	-0.279643	0.365238	-2.31672	0.0265727	0.489748
MIMAT0009402	mmu-miR-1938	miRNA	-0.279655	0.270511	-2.77367	0.00887401	0.268756
MIMAT0028073	mmu-miR-7083-3p	miRNA	-0.280256	0.260632	-2.28527	0.0285489	0.489748
MIMAT0017080	mmu-miR-379-3p	miRNA	-0.281139	0.565542	-2.29981	0.0276198	0.489748
MIMAT0009440	mmu-miR-1967	miRNA	-0.281706	0.590624	-1.67184	0.103588	0.726638
MIMAT0014951	mmu-miR-3110-5p	miRNA	-0.283011	0.492235	-2.60338	0.013508	0.346093
MIMAT0000648	mmu-miR-10a-5p	miRNA	-0.285539	0.395505	-2.05192	0.0478142	0.607857
MIMAT0028422	mmu-miR-7227-5p	miRNA	-0.286696	0.168016	-2.54254	0.0156458	0.36053
MIMAT0004538	mmu-miR-10b-3p	miRNA	-0.286885	0.252309	-2.58796	0.0140228	0.346093
MIMAT0001090	mmu-miR-409-3p	miRNA	-0.288596	0.554308	-1.77248	0.0851308	0.702937
MIMAT0014895	mmu-miR-3087-5p	miRNA	-0.289606	1.24823	-0.538849	0.593445	0.964475
MIMAT0017237	mmu-miR-668-5p	miRNA	-0.289727	3.39318	-0.271342	0.787742	0.982514
MIMAT0003457	mmu-miR-680	miRNA	-0.289767	0.62087	-1.85285	0.0724579	0.684807
MIMAT0027804	mmu-miR-6952-5p	miRNA	-0.289837	1.04135	-0.876016	0.387069	0.905059
MIMAT0029907	mmu-miR-7688-3p	miRNA	-0.290622	0.650253	-1.59355	0.120142	0.750061
MIMAT0000532	mmu-miR-23a-3p	miRNA	-0.292313	2.61988	-0.335849	0.739015	0.973813
MIMAT0003891	mmu-miR-770-3p	miRNA	-0.295385	0.831661	-1.71613	0.0950908	0.710552
MIMAT0003505	mmu-miR-714	miRNA	-0.296352	1.57422	-0.607197	0.547689	0.944837
MIMAT0000652	mmu-miR-25-3p	miRNA	-0.296683	4.64446	-0.197939	0.844252	0.99273
MIMAT0025129	mmu-miR-6383	miRNA	-0.29716	0.588678	-1.94516	0.0599271	0.643666
MIMAT0000144	mmu-miR-132-3p	miRNA	-0.298569	1.35387	-0.533516	0.597091	0.965437
MIMAT0000162	mmu-miR-152-3p	miRNA	-0.299309	0.174946	-2.43217	0.0203327	0.399946
MIMAT0027921	mmu-miR-7008-3p	miRNA	-0.303664	0.571762	-1.52995	0.135132	0.750234
MIMAT0027914	mmu-miR-7005-5p	miRNA	-0.307417	1.03278	-0.61109	0.545138	0.944036
MIMAT0029858	mmu-miR-7675-5p	miRNA	-0.308208	0.607967	-1.57184	0.125098	0.750061
MIMAT0017076	mmu-miR-363-5p	miRNA	-0.30822	0.86974	-2.10272	0.042845	0.575692
MIMAT0000126	mmu-miR-27b-3p	miRNA	-0.30928	0.588676	-1.23607	0.224768	0.829852
MIMAT0028008	mmu-miR-7052-5p	miRNA	-0.310218	1.38781	-0.59054	0.558671	0.949479
MIMAT0003462	mmu-miR-684	miRNA	-0.311306	0.241606	-2.68247	0.0111312	0.319065
MIMAT0028128	mmu-miR-7115-3p	miRNA	-0.312509	0.429019	-2.03445	0.0496357	0.611
MIMAT0007865	mmu-miR-1897-3p	miRNA	-0.312558	0.419578	-2.24462	0.0312988	0.493817
MIMAT0019351	mmu-miR-3967	miRNA	-0.313829	0.881878	-1.73455	0.0917328	0.710552
MIMAT0026642	mmu-miR-3475-5p	miRNA	-0.315146	0.786128	-1.75896	0.0874352	0.709899
MIMAT0028010	mmu-miR-7053-5p	miRNA	-0.316939	2.83274	-0.332597	0.741448	0.973813
MIMAT0017004	mmu-miR-206-5p	miRNA	-0.319201	0.448932	-2.78654	0.00859242	0.268756
MIMAT0028067	mmu-miR-7080-3p	miRNA	-0.319564	0.291885	-2.82917	0.00771758	0.262949
MIMAT0000140	mmu-miR-128-3p	miRNA	-0.321074	0.692788	-1.3134	0.1977	0.81931
MIMAT0022355	mmu-miR-5615-5p	miRNA	-0.322464	0.308565	-2.79262	0.00846205	0.268756
MIMAT0004665	mmu-miR-218-1-3p	miRNA	-0.323457	0.218421	-2.25462	0.0306008	0.493817
MIMAT0027745	mmu-miR-6922-3p	miRNA	-0.324158	0.297556	-3.16678	0.00321459	0.188055
MIMAT0014828	mmu-miR-3061-5p	miRNA	-0.325201	0.82958	-1.60905	0.116702	0.750061
MIMAT0015640	mmu-miR-3470a	miRNA	-0.326118	0.818293	-1.97818	0.0559239	0.638482
MIMAT0000558	mmu-miR-325-5p	miRNA	-0.326762	0.439511	-2.24877	0.0310076	0.493817
MIMAT0022373	mmu-miR-5623-5p	miRNA	-0.331355	1.06932	-1.42426	0.163338	0.785242
MIMAT0025169	mmu-miR-6415	miRNA	-0.3318	1.0725	-1.62764	0.112686	0.743949
MIMAT0017269	mmu-miR-147-5p	miRNA	-0.336061	0.592919	-2.12454	0.0408545	0.575692
MIMAT0017245	mmu-miR-760-5p	miRNA	-0.337204	1.02849	-1.18087	0.245717	0.833899
MIMAT0005440	mmu-miR-24-2-5p	miRNA	-0.338724	0.69564	-2.25044	0.0308909	0.493817
MIMAT0017014	mmu-miR-208a-5p	miRNA	-0.343257	0.489956	-2.84356	0.00744146	0.258151
MIMAT0000387	mmu-miR-130b-3p	miRNA	-0.348855	2.71837	-0.365866	0.716695	0.973722
MIMAT0027938	mmu-miR-7017-5p	miRNA	-0.351275	0.715003	-2.55784	0.0150808	0.355236
MIMAT0027894	mmu-miR-6996-5p	miRNA	-0.355445	0.3122	-3.26525	0.00247057	0.162546
MIMAT0028089	mmu-miR-7091-3p	miRNA	-0.360149	0.618677	-2.28221	0.0287483	0.489748
MIMAT0020613	mmu-miR-5106	miRNA	-0.361956	0.707107	-2.667	0.0115631	0.322552
MIMAT0004846	mmu-miR-881-3p	miRNA	-0.36359	0.387395	-2.29986	0.0276165	0.489748
MIMAT0015646	mmu-miR-3474	miRNA	-0.364011	0.655237	-1.64001	0.110074	0.741646
MIMAT0000595	mmu-miR-345-5p	miRNA	-0.365175	1.26502	-1.2009	0.237957	0.833899
MIMAT0027752	mmu-miR-6926-5p	miRNA	-0.369055	1.03596	-0.999736	0.324386	0.86553
MIMAT0001093	mmu-miR-411-3p	miRNA	-0.376248	0.451564	-3.03742	0.00451934	0.218145
MIMAT0027983	mmu-miR-7039-3p	miRNA	-0.379044	0.207202	-2.99908	0.00499362	0.221791
MIMAT0000159	mmu-miR-149-5p	miRNA	-0.385116	0.665157	-1.76828	0.0858409	0.702937
MIMAT0027883	mmu-miR-6990-3p	miRNA	-0.394361	0.621209	-2.97348	0.00533604	0.224253
MIMAT0028020	mmu-miR-7058-5p	miRNA	-0.395384	0.969035	-1.07882	0.28814	0.855502
MIMAT0019350	mmu-miR-3966	miRNA	-0.400202	0.302154	-3.23916	0.00264991	0.168534
MIMAT0003171	mmu-miR-542-5p	miRNA	-0.40095	0.775332	-1.40921	0.167708	0.785242
MIMAT0000515	mmu-miR-30d-5p	miRNA	-0.414364	2.62104	-0.414004	0.681429	0.973722
MIMAT0024864	mmu-miR-6244	miRNA	-0.41751	1.22972	-0.986358	0.330813	0.86553
MIMAT0003475	mmu-miR-146b-5p	miRNA	-0.424646	0.861011	-2.29702	0.0277959	0.489748
MIMAT0029863	mmu-miR-129b-3p	miRNA	-0.435784	1.08251	-1.677	0.102565	0.724796
MIMAT0004869	mmu-miR-421-3p	miRNA	-0.442239	1.69323	-0.716357	0.478583	0.934125
MIMAT0007878	mmu-miR-1894-3p	miRNA	-0.468022	1.61975	-0.85934	0.396074	0.911619
MIMAT0000219	mmu-miR-24-3p	miRNA	-0.469193	4.5935	-0.332412	0.741586	0.973813
MIMAT0000145	mmu-miR-133a-3p	miRNA	-0.487571	0.350602	-3.43211	0.00157017	0.127797
MIMAT0000129	mmu-miR-30a-3p	miRNA	-0.488528	0.68601	-3.44246	0.00152625	0.127797
MIMAT0000531	mmu-miR-22-3p	miRNA	-0.506002	2.89356	-0.435475	0.665925	0.971396
MIMAT0000706	mmu-miR-362-5p	miRNA	-0.510192	0.39356	-3.76242	0.00062524	0.0808901
MIMAT0027775	mmu-miR-6937-3p	miRNA	-0.530706	0.637569	-2.57901	0.0143298	0.346093
MIMAT0015643	mmu-miR-3472	miRNA	-0.550828	0.811749	-1.19087	0.241819	0.833899
MIMAT0000534	mmu-miR-26b-5p	miRNA	-0.559193	0.62898	-1.90047	0.065738	0.660148
MIMAT0025095	mmu-miR-6352	miRNA	-0.560341	0.643708	-3.76659	0.000617905	0.0808901
MIMAT0027954	mmu-miR-7025-5p	miRNA	-0.565947	3.79986	-0.52336	0.604064	0.967856
MIMAT0000651	mmu-miR-19a-3p	miRNA	-0.568199	0.815167	-2.1524	0.0384325	0.572884
MIMAT0025131	mmu-miR-6385	miRNA	-0.571331	0.877447	-2.07831	0.045173	0.598543
MIMAT0004536	mmu-miR-151-5p	miRNA	-0.580021	1.88881	-0.624502	0.536399	0.942101
MIMAT0000605	mmu-miR-350-3p	miRNA	-0.581176	0.700978	-2.29047	0.0282133	0.489748
MIMAT0000514	mmu-miR-30c-5p	miRNA	-0.591945	2.77797	-0.507935	0.614726	0.967856
MIMAT0000590	mmu-miR-342-3p	miRNA	-0.597943	1.86015	-0.631532	0.531848	0.942101
MIMAT0009456	mmu-miR-1839-5p	miRNA	-0.603593	0.608246	-3.32086	0.00212625	0.144888
MIMAT0001342	mmu-miR-425-3p	miRNA	-0.614256	1.12474	-1.78227	0.083493	0.698705
MIMAT0000383	mmu-let-7d-5p	miRNA	-0.626533	7.57235	-0.438875	0.663483	0.970893
MIMAT0000154	mmu-miR-142-5p	miRNA	-0.63157	0.284515	-3.75643	0.000635928	0.0808901
MIMAT0027712	mmu-miR-6906-5p	miRNA	-0.663135	5.82917	-0.515155	0.609724	0.967856
MIMAT0000537	mmu-miR-27a-3p	miRNA	-0.664979	0.502886	-3.34103	0.00201314	0.143625
MIMAT0000213	mmu-miR-184-3p	miRNA	-0.74428	0.633127	-2.97928	0.00525655	0.224253
MIMAT0000151	mmu-miR-140-5p	miRNA	-0.747378	0.411928	-5.53681	3.27561e-06	0.00156246
MIMAT0027724	mmu-miR-6912-5p	miRNA	-0.820259	0.677706	-1.96862	0.0570584	0.640396
MIMAT0020632	mmu-miR-3473d	miRNA	-0.830415	1.85493	-1.50106	0.142422	0.754836
MIMAT0017246	mmu-miR-677-3p	miRNA	-0.858719	1.21868	-1.57739	0.123815	0.750061
MIMAT0016988	mmu-miR-144-5p	miRNA	-0.889024	0.914645	-3.16236	0.00325252	0.188055
MIMAT0000657	mmu-miR-200c-3p	miRNA	-0.905564	3.46365	-0.681427	0.500142	0.934125
MIMAT0004750	mmu-miR-425-5p	miRNA	-0.915755	3.40921	-0.691257	0.494021	0.934125
MIMAT0027926	mmu-miR-7011-5p	miRNA	-0.916369	1.27513	-1.55596	0.128827	0.750061
MIMAT0000385	mmu-miR-106a-5p	miRNA	-0.916464	2.67336	-0.90377	0.372374	0.889235
MIMAT0020620	mmu-miR-5112	miRNA	-0.926759	3.29654	-0.835086	0.409405	0.918736
MIMAT0000649	mmu-miR-17-5p	miRNA	-0.990242	5.05935	-0.719303	0.47679	0.934125
MIMAT0002889	mmu-miR-532-5p	miRNA	-1.06091	1.04471	-2.56824	0.0147075	0.350773
MIMAT0000535	mmu-miR-29a-3p	miRNA	-1.10272	1.37018	-1.41938	0.164746	0.785242
MIMAT0011213	mmu-miR-2137	miRNA	-1.12681	7.21689	-1.19513	0.240174	0.833899
MIMAT0000530	mmu-miR-21a-5p	miRNA	-1.13197	0.815288	-2.30408	0.0273521	0.489748
MIMAT0000156	mmu-miR-144-3p	miRNA	-1.14125	0.940932	-3.03288	0.00457327	0.218145
MIMAT0027798	mmu-miR-6949-5p	miRNA	-1.16504	4.14937	-0.957056	0.345186	0.87629
MIMAT0000224	mmu-miR-194-5p	miRNA	-1.17859	1.28048	-2.24437	0.0313162	0.493817
MIMAT0000128	mmu-miR-30a-5p	miRNA	-1.20558	2.51155	-1.19345	0.240821	0.833899
MIMAT0000526	mmu-miR-15a-5p	miRNA	-1.26987	1.52301	-1.55679	0.128631	0.750061
MIMAT0027970	mmu-miR-7033-5p	miRNA	-1.27101	1.95639	-1.28763	0.206431	0.821897
MIMAT0000386	mmu-miR-106b-5p	miRNA	-1.27491	3.77785	-0.822162	0.416621	0.920806
MIMAT0003187	mmu-miR-20b-5p	miRNA	-1.28983	0.803886	-2.36435	0.0238144	0.454379
MIMAT0027858	mmu-miR-6978-5p	miRNA	-1.29234	0.771669	-3.42058	0.0016206	0.127797
MIMAT0000248	mmu-miR-30e-5p	miRNA	-1.42694	0.760136	-3.53855	0.00117081	0.124799
MIMAT0000130	mmu-miR-30b-5p	miRNA	-1.43972	1.2667	-2.9684	0.00540651	0.224253
MIMAT0000528	mmu-miR-18a-5p	miRNA	-1.56061	2.03003	-1.8966	0.0662639	0.661945
MIMAT0000152	mmu-miR-140-3p	miRNA	-1.58925	6.14401	-1.04299	0.304193	0.86553
MIMAT0000529	mmu-miR-20a-5p	miRNA	-1.6048	3.85825	-1.14836	0.258706	0.835242
MIMAT0000225	mmu-miR-195a-5p	miRNA	-1.72194	1.07674	-2.69281	0.0108508	0.319065
MIMAT0000540	mmu-miR-93-5p	miRNA	-1.88716	7.66921	-1.35785	0.18331	0.803985
MIMAT0000513	mmu-miR-19b-3p	miRNA	-2.07734	0.914075	-3.33751	0.00203243	0.143625
MIMAT0000527	mmu-miR-16-5p	miRNA	-2.11968	7.27742	-1.44999	0.156076	0.780676
MIMAT0001632	mmu-miR-451a	miRNA	-2.18499	5.93282	-1.5334	0.134281	0.750061
MIMAT0005460	mmu-miR-1224-5p	miRNA	-2.80048	5.69749	-2.03798	0.0492626	0.610344

## Sheet: Blood_50_ICRR_vs_CCR
Accession	Transcript.ID.Array.Design.	Sequence.Type	logFC	AveExpr	t	P.Value	adj.P.Val
MIMAT0000565	mmu-miR-328-3p	miRNA	3.61879	4.43358	2.07768	0.0452348	0.63459
MIMAT0004825	mmu-miR-423-5p	miRNA	3.3924	4.24042	2.34802	0.0247296	0.54469
MIMAT0003740	mmu-miR-674-5p	miRNA	2.88713	4.19306	1.74055	0.0906605	0.752206
MIMAT0017049	mmu-miR-25-5p	miRNA	2.81674	2.29443	3.07148	0.00413409	0.315514
MIMAT0004899	mmu-miR-92b-3p	miRNA	2.81245	2.12104	3.41286	0.00165522	0.210544
MIMAT0000666	mmu-miR-320-3p	miRNA	2.68436	7.26553	2.2131	0.033591	0.591754
MIMAT0000210	mmu-miR-181a-5p	miRNA	2.67369	2.69817	2.49354	0.017589	0.494467
MIMAT0028129	mmu-miR-7116-5p	miRNA	2.62544	4.77427	1.42134	0.16418	0.815789
MIMAT0027762	mmu-miR-6931-5p	miRNA	2.5356	2.71064	2.3957	0.0221426	0.541688
MIMAT0000539	mmu-miR-92a-3p	miRNA	2.52197	7.57017	1.63922	0.110241	0.752206
MIMAT0000524	mmu-let-7e-5p	miRNA	2.37377	2.15825	2.79045	0.00850839	0.40585
MIMAT0027838	mmu-miR-6968-5p	miRNA	2.27726	3.75063	1.89056	0.0670913	0.719158
MIMAT0000214	mmu-miR-185-5p	miRNA	2.26985	4.9874	1.40267	0.169636	0.820425
MIMAT0000533	mmu-miR-26a-5p	miRNA	2.20972	3.93033	1.5261	0.136086	0.798929
MIMAT0025146	mmu-miR-6395	miRNA	2.2084	1.51251	4.23674	0.000159512	0.0561049
MIMAT0003454	mmu-miR-423-3p	miRNA	2.20504	2.79428	2.06007	0.0469842	0.63459
MIMAT0000376	mmu-miR-298-5p	miRNA	2.19565	1.02708	6.3886	2.51872e-07	0.000284605
MIMAT0000135	mmu-miR-125a-5p	miRNA	2.1887	0.927563	6.02591	7.48735e-07	0.000476195
MIMAT0027728	mmu-miR-6914-5p	miRNA	2.15633	2.61885	2.02885	0.0502326	0.641787
MIMAT0000386	mmu-miR-106b-5p	miRNA	2.14973	3.77785	1.38632	0.174528	0.822222
MIMAT0000538	mmu-miR-31-5p	miRNA	2.14947	2.73228	2.00463	0.0528863	0.642078
MIMAT0004582	mmu-miR-106b-3p	miRNA	2.0703	5.1461	1.21602	0.232216	0.842021
MIMAT0004187	mmu-miR-744-5p	miRNA	1.97039	5.18	1.2593	0.216362	0.838118
MIMAT0003127	mmu-miR-484	miRNA	1.96614	2.16629	2.30203	0.02748	0.569368
MIMAT0028070	mmu-miR-7082-5p	miRNA	1.94615	2.02736	2.44715	0.0196291	0.527499
MIMAT0004781	mmu-miR-532-3p	miRNA	1.94269	1.80434	3.21685	0.00281299	0.243963
MIMAT0031405	mmu-miR-8101	miRNA	1.92443	3.54999	1.62196	0.113901	0.752206
MIMAT0020641	mmu-miR-5130	miRNA	1.92091	4.06067	1.42128	0.164197	0.815789
MIMAT0000650	mmu-miR-17-3p	miRNA	1.9102	3.38408	1.44649	0.157048	0.807309
MIMAT0000529	mmu-miR-20a-5p	miRNA	1.90234	3.85825	1.36127	0.182237	0.829524
MIMAT0000569	mmu-miR-330-3p	miRNA	1.88593	0.890219	4.09654	0.000239933	0.0653989
MIMAT0025580	mmu-let-7k	miRNA	1.88418	0.696095	3.72873	0.00068769	0.119283
MIMAT0017030	mmu-miR-328-5p	miRNA	1.87832	2.88911	1.8699	0.0699877	0.728547
MIMAT0007879	mmu-miR-1893	miRNA	1.87659	2.16303	2.68133	0.0111626	0.463931
MIMAT0003495	mmu-miR-705	miRNA	1.85656	2.64075	1.67718	0.10253	0.752206
MIMAT0027994	mmu-miR-7045-5p	miRNA	1.85637	4.17299	1.46238	0.152673	0.807309
MIMAT0027832	mmu-miR-3547-5p	miRNA	1.85227	5.58378	1.46632	0.1516	0.807309
MIMAT0027998	mmu-miR-7047-5p	miRNA	1.82327	6.63096	1.3536	0.184651	0.829524
MIMAT0000658	mmu-miR-210-3p	miRNA	1.81815	2.38884	2.09084	0.0439645	0.63459
MIMAT0031420	mmu-miR-8114	miRNA	1.80502	1.3195	4.20222	0.00017643	0.0561049
MIMAT0017259	mmu-miR-505-5p	miRNA	1.78484	2.84666	1.81753	0.0778137	0.738649
MIMAT0014862	mmu-miR-3077-5p	miRNA	1.78407	6.35086	1.43582	0.160043	0.811176
MIMAT0028048	mmu-miR-7071-5p	miRNA	1.78404	0.790916	6.33211	2.98328e-07	0.000284605
MIMAT0027788	mmu-miR-6944-5p	miRNA	1.76194	3.00761	1.52654	0.135976	0.798929
MIMAT0003151	mmu-miR-378a-3p	miRNA	1.73945	3.27213	1.4766	0.148836	0.807309
MIMAT0000121	mmu-let-7g-5p	miRNA	1.73443	3.08266	1.67763	0.102443	0.752206
MIMAT0017206	mmu-miR-486-3p	miRNA	1.71041	5.35608	1.08389	0.285918	0.847779
MIMAT0000652	mmu-miR-25-3p	miRNA	1.67959	4.64446	1.12058	0.270192	0.842021
MIMAT0000647	mmu-miR-107-3p	miRNA	1.66914	5.50324	1.14798	0.258859	0.842021
MIMAT0000387	mmu-miR-130b-3p	miRNA	1.65547	2.71837	1.7362	0.091437	0.752206
MIMAT0000525	mmu-let-7f-5p	miRNA	1.65375	2.85444	1.53439	0.134039	0.796717
MIMAT0003509	mmu-miR-501-3p	miRNA	1.6503	1.53595	2.73435	0.00978921	0.455556
MIMAT0017039	mmu-miR-346-3p	miRNA	1.61599	6.62506	1.2393	0.223586	0.838118
MIMAT0029849	mmu-miR-7671-3p	miRNA	1.60398	2.59555	2.20816	0.033964	0.591754
MIMAT0014944	mmu-miR-3107-3p	miRNA	1.59676	5.39811	1.02137	0.314175	0.85284
MIMAT0000670	mmu-miR-222-3p	miRNA	1.56649	4.29407	1.10127	0.278389	0.843252
MIMAT0029898	mmu-miR-7686-5p	miRNA	1.55395	5.31673	0.969756	0.338906	0.85284
MIMAT0028438	mmu-miR-7235-5p	miRNA	1.55222	2.76707	1.14798	0.258862	0.842021
MIMAT0000545	mmu-miR-98-5p	miRNA	1.54707	1.08115	2.96329	0.00547833	0.348422
MIMAT0017059	mmu-miR-211-3p	miRNA	1.54664	2.96247	1.48546	0.146488	0.807309
MIMAT0003130	mmu-miR-486-5p	miRNA	1.54558	10.7344	2.04749	0.04827	0.63459
MIMAT0014943	mmu-miR-3107-5p	miRNA	1.54558	10.7344	2.04749	0.04827	0.63459
MIMAT0000122	mmu-let-7i-5p	miRNA	1.54035	4.26217	0.987125	0.330442	0.85284
MIMAT0001632	mmu-miR-451a	miRNA	1.52543	5.93282	1.07053	0.291801	0.851053
MIMAT0000526	mmu-miR-15a-5p	miRNA	1.52462	1.52301	1.8691	0.0701015	0.728547
MIMAT0009437	mmu-miR-1964-3p	miRNA	1.51423	0.698126	4.53893	6.5498e-05	0.0312426
MIMAT0029822	mmu-miR-7658-5p	miRNA	1.49878	2.8762	1.47066	0.150428	0.807309
MIMAT0000669	mmu-miR-221-3p	miRNA	1.48645	2.95414	1.3297	0.192327	0.835833
MIMAT0000161	mmu-miR-151-3p	miRNA	1.43242	2.52288	1.41875	0.164928	0.815789
MIMAT0009411	mmu-miR-1306-3p	miRNA	1.4274	1.5507	2.19829	0.0347193	0.591754
MIMAT0007871	mmu-miR-1892	miRNA	1.42223	2.71513	1.54042	0.132565	0.795034
MIMAT0005859	mmu-miR-1198-5p	miRNA	1.41572	2.94937	1.27515	0.210762	0.838118
MIMAT0020643	mmu-miR-5132-5p	miRNA	1.41173	1.47945	2.25663	0.0304626	0.585854
MIMAT0024860	mmu-miR-6239	miRNA	1.4	2.24119	1.84542	0.0735574	0.728602
MIMAT0013803	mmu-miR-2861	miRNA	1.39985	9.27393	2.04764	0.0482551	0.63459
MIMAT0027992	mmu-miR-7044-5p	miRNA	1.3841	5.44693	1.01854	0.315501	0.85284
MIMAT0003782	mmu-miR-676-3p	miRNA	1.37674	2.115	1.53485	0.133926	0.796717
MIMAT0000132	mmu-miR-99b-5p	miRNA	1.37544	1.75872	1.68826	0.100366	0.752206
MIMAT0000559	mmu-miR-326-3p	miRNA	1.36852	1.27494	3.3567	0.00192922	0.220279
MIMAT0009458	mmu-miR-1981-5p	miRNA	1.34623	3.3521	1.30387	0.200896	0.838118
MIMAT0027842	mmu-miR-6970-5p	miRNA	1.34049	5.20926	0.942476	0.35249	0.862246
MIMAT0003496	mmu-miR-706	miRNA	1.32534	3.42228	0.859276	0.396109	0.875302
MIMAT0000221	mmu-miR-191-5p	miRNA	1.29393	7.02083	1.00534	0.321722	0.85284
MIMAT0019348	mmu-miR-378b	miRNA	1.29089	1.61692	2.10122	0.042985	0.63459
MIMAT0000531	mmu-miR-22-3p	miRNA	1.29015	2.89356	1.11032	0.274525	0.842021
MIMAT0004636	mmu-miR-93-3p	miRNA	1.27667	1.85753	1.63039	0.112101	0.752206
MIMAT0028068	mmu-miR-7081-5p	miRNA	1.27163	2.09642	2.07726	0.0452755	0.63459
MIMAT0027970	mmu-miR-7033-5p	miRNA	1.25392	1.95639	1.27031	0.212459	0.838118
MIMAT0029902	mmu-miR-7687-5p	miRNA	1.24835	1.58043	2.62354	0.0128611	0.463931
MIMAT0028411	mmu-miR-7221-3p	miRNA	1.24452	5.52108	0.842671	0.405206	0.877008
MIMAT0029799	mmu-miR-7648-3p	miRNA	1.23645	5.71634	0.846039	0.403351	0.87591
MIMAT0028133	mmu-miR-7118-5p	miRNA	1.19932	3.05594	1.12917	0.266605	0.842021
MIMAT0025583	mmu-miR-6538	miRNA	1.19803	8.67707	1.42603	0.162832	0.81544
MIMAT0029878	mmu-miR-3620-5p	miRNA	1.19684	5.08942	0.777247	0.442301	0.890234
MIMAT0017027	mmu-miR-326-5p	miRNA	1.17109	0.94961	3.03266	0.00457591	0.335802
MIMAT0017341	mmu-miR-1934-3p	miRNA	1.17101	3.392	0.883687	0.382971	0.875302
MIMAT0000546	mmu-miR-103-3p	miRNA	1.16682	6.45006	0.811326	0.422731	0.879576
MIMAT0000522	mmu-let-7b-5p	miRNA	1.15905	8.7851	0.987436	0.330292	0.85284
MIMAT0027976	mmu-miR-7036-5p	miRNA	1.13663	1.8718	1.64364	0.109319	0.752206
MIMAT0025138	mmu-miR-378c	miRNA	1.13582	1.91007	1.64655	0.108716	0.752206
MIMAT0000125	mmu-miR-23b-3p	miRNA	1.11753	1.91138	1.55241	0.129675	0.79048
MIMAT0014934	mmu-miR-3102-5p.2-5p	miRNA	1.1118	0.983999	2.49273	0.0176225	0.494467
MIMAT0003892	mmu-miR-762	miRNA	1.09284	7.36168	1.14568	0.259797	0.842021
MIMAT0000556	mmu-miR-324-3p	miRNA	1.08164	1.23934	2.25312	0.0307051	0.585854
MIMAT0004861	mmu-miR-877-5p	miRNA	1.0755	3.34663	1.17606	0.247608	0.842021
MIMAT0016996	mmu-miR-185-3p	miRNA	1.07309	0.921708	2.63559	0.0124886	0.463931
MIMAT0020607	mmu-miR-5100	miRNA	1.07269	2.27828	1.02668	0.311705	0.85284
MIMAT0000152	mmu-miR-140-3p	miRNA	1.05025	6.14401	0.68926	0.495261	0.9008
MIMAT0031416	mmu-miR-8110	miRNA	1.04343	6.06537	0.762789	0.450764	0.890234
MIMAT0000515	mmu-miR-30d-5p	miRNA	1.03089	2.62104	1.02999	0.310168	0.85284
MIMAT0019336	mmu-miR-3960	miRNA	1.02727	9.08485	1.54078	0.132478	0.795034
MIMAT0017256	mmu-miR-700-5p	miRNA	1.02557	0.937772	3.35038	0.00196266	0.220279
MIMAT0028076	mmu-miR-7085-5p	miRNA	1.0247	1.45251	1.24734	0.220658	0.838118
MIMAT0000219	mmu-miR-24-3p	miRNA	1.02444	4.5935	0.725794	0.472852	0.896561
MIMAT0000384	mmu-let-7d-3p	miRNA	1.02129	0.726932	2.05738	0.0472571	0.63459
MIMAT0000532	mmu-miR-23a-3p	miRNA	1.01528	2.61988	1.1665	0.2514	0.842021
MIMAT0027754	mmu-miR-6927-5p	miRNA	1.00988	0.990572	3.55863	0.00110734	0.162523
MIMAT0020645	mmu-miR-5134-5p	miRNA	0.988575	1.09044	2.22357	0.0328135	0.591754
MIMAT0003469	mmu-miR-690	miRNA	0.977524	2.76896	0.871644	0.389417	0.875302
MIMAT0003479	mmu-miR-669c-5p	miRNA	0.970069	1.05116	3.87103	0.000459158	0.0876073
MIMAT0003481	mmu-miR-695	miRNA	0.959952	1.68306	1.44166	0.158398	0.807309
MIMAT0025167	mmu-miR-378d	miRNA	0.953849	1.1079	2.14586	0.0389895	0.616667
MIMAT0004859	mmu-miR-193b-3p	miRNA	0.928168	1.74286	1.23351	0.225708	0.841517
MIMAT0000124	mmu-miR-15b-5p	miRNA	0.920067	5.60219	0.484861	0.630834	0.940964
MIMAT0031422	mmu-miR-8116	miRNA	0.913664	1.5537	2.41293	0.0212704	0.541688
MIMAT0000649	mmu-miR-17-5p	miRNA	0.908355	5.05935	0.659821	0.513742	0.907698
MIMAT0027774	mmu-miR-6937-5p	miRNA	0.908122	6.6014	0.723928	0.473982	0.896561
MIMAT0029809	mmu-miR-7036b-3p	miRNA	0.885663	0.938268	2.65415	0.0119337	0.463931
MIMAT0027806	mmu-miR-6953-5p	miRNA	0.884574	2.28577	1.27719	0.21005	0.838118
MIMAT0003742	mmu-miR-455-3p	miRNA	0.857238	1.25589	1.28194	0.208396	0.838118
MIMAT0000385	mmu-miR-106a-5p	miRNA	0.849277	2.67336	0.837514	0.408058	0.877762
MIMAT0014901	mmu-miR-3090-5p	miRNA	0.84492	1.04271	1.75672	0.0878225	0.752206
MIMAT0000657	mmu-miR-200c-3p	miRNA	0.841774	3.46365	0.633426	0.530625	0.909222
MIMAT0028020	mmu-miR-7058-5p	miRNA	0.835569	0.969035	2.27988	0.0289005	0.585854
MIMAT0027996	mmu-miR-7046-5p	miRNA	0.834675	1.29149	1.54975	0.130311	0.790498
MIMAT0003188	mmu-miR-503-5p	miRNA	0.834383	1.20823	1.88072	0.0684577	0.725652
MIMAT0000528	mmu-miR-18a-5p	miRNA	0.810263	2.03003	0.98471	0.33161	0.85284
MIMAT0000540	mmu-miR-93-5p	miRNA	0.810201	7.66921	0.582957	0.563707	0.922318
MIMAT0014804	mmu-miR-1249-5p	miRNA	0.794926	1.20852	2.36695	0.0236717	0.544165
MIMAT0014841	mmu-miR-3067-3p	miRNA	0.790114	0.73873	2.40281	0.0217789	0.541688
MIMAT0017237	mmu-miR-668-5p	miRNA	0.789932	3.39318	0.739804	0.464414	0.892494
MIMAT0027698	mmu-miR-6899-5p	miRNA	0.788426	0.878541	3.27043	0.00243641	0.232433
MIMAT0004750	mmu-miR-425-5p	miRNA	0.785052	3.40921	0.592596	0.557309	0.922318
MIMAT0003490	mmu-miR-700-3p	miRNA	0.778046	1.598	1.50266	0.14201	0.799951
MIMAT0027862	mmu-miR-6980-5p	miRNA	0.762657	1.4767	1.56181	0.127445	0.787704
MIMAT0014939	mmu-miR-3104-5p	miRNA	0.758522	1.38058	1.2702	0.2125	0.838118
MIMAT0028044	mmu-miR-7069-5p	miRNA	0.757904	1.52542	1.17669	0.24736	0.842021
MIMAT0027950	mmu-miR-7023-5p	miRNA	0.751101	1.0023	1.72998	0.0925566	0.752206
MIMAT0000514	mmu-miR-30c-5p	miRNA	0.75078	2.77797	0.644228	0.52368	0.909112
MIMAT0017325	mmu-miR-466i-5p	miRNA	0.750153	1.67178	1.70458	0.0972473	0.752206
MIMAT0028040	mmu-miR-6769b-5p	miRNA	0.74764	1.92307	1.08626	0.284881	0.847779
MIMAT0009444	mmu-miR-1970	miRNA	0.744793	0.538995	1.85006	0.0728694	0.728547
MIMAT0027848	mmu-miR-6973a-5p	miRNA	0.742819	1.31817	1.74954	0.0890742	0.752206
MIMAT0016990	mmu-miR-149-3p	miRNA	0.740898	8.04965	0.777475	0.442168	0.890234
MIMAT0029812	mmu-miR-7653-5p	miRNA	0.733836	2.18126	1.36457	0.181208	0.829126
MIMAT0025090	mmu-miR-6347	miRNA	0.73225	3.33764	0.738478	0.46521	0.892494
MIMAT0025587	mmu-miR-3473e	miRNA	0.721386	2.02584	0.933938	0.356815	0.868168
MIMAT0005850	mmu-miR-1192	miRNA	0.716827	0.984822	1.51523	0.138806	0.799951
MIMAT0000766	mmu-miR-335-5p	miRNA	0.711541	0.99355	1.1073	0.275813	0.842579
MIMAT0017019	mmu-miR-23a-5p	miRNA	0.704098	0.48461	2.85573	0.00721535	0.393501
MIMAT0000128	mmu-miR-30a-5p	miRNA	0.703728	2.51155	0.696645	0.490684	0.897594
MIMAT0017052	mmu-miR-210-5p	miRNA	0.694322	0.760267	3.21896	0.00279721	0.243963
MIMAT0003187	mmu-miR-20b-5p	miRNA	0.691248	0.803886	1.2671	0.21359	0.838118
MIMAT0025123	mmu-let-7j	miRNA	0.671821	1.22018	1.73003	0.0925472	0.752206
MIMAT0000527	mmu-miR-16-5p	miRNA	0.669256	7.27742	0.457812	0.649952	0.940964
MIMAT0011213	mmu-miR-2137	miRNA	0.663232	7.21689	0.703446	0.48649	0.896561
MIMAT0009441	mmu-miR-1968-5p	miRNA	0.651479	0.673237	2.16418	0.0374468	0.61067
MIMAT0004881	mmu-miR-466f-5p	miRNA	0.650651	0.742684	2.5752	0.0144622	0.48411
MIMAT0017353	mmu-miR-664-5p	miRNA	0.648514	1.27932	1.84964	0.0729311	0.728547
MIMAT0007867	mmu-miR-1895	miRNA	0.648288	1.00026	2.35064	0.0245805	0.54469
MIMAT0028046	mmu-miR-7070-5p	miRNA	0.647827	1.00249	1.74199	0.0904043	0.752206
MIMAT0017239	mmu-miR-667-5p	miRNA	0.643831	1.45419	1.29449	0.204078	0.838118
MIMAT0029823	mmu-miR-7658-3p	miRNA	0.642421	0.845722	2.22113	0.0329933	0.591754
MIMAT0003711	mmu-miR-652-3p	miRNA	0.640167	4.56594	0.375318	0.709718	0.955625
MIMAT0027884	mmu-miR-6991-5p	miRNA	0.636429	2.15483	0.648574	0.5209	0.909112
MIMAT0020618	mmu-miR-5110	miRNA	0.635614	0.873724	1.68414	0.101166	0.752206
MIMAT0025162	mmu-miR-6409	miRNA	0.635147	1.42161	1.22078	0.230432	0.842021
MIMAT0027940	mmu-miR-7018-5p	miRNA	0.629397	1.02095	1.45777	0.153931	0.807309
MIMAT0027709	mmu-miR-6904-3p	miRNA	0.624315	0.768188	3.44547	0.00151366	0.20629
MIMAT0031403	mmu-miR-8100	miRNA	0.620654	0.92548	2.67436	0.0113558	0.463931
MIMAT0014933	mmu-miR-3102-5p	miRNA	0.615513	3.7516	0.487403	0.62905	0.940964
MIMAT0020646	mmu-miR-5135	miRNA	0.611182	1.48376	1.37088	0.179248	0.828591
MIMAT0009428	mmu-miR-1956	miRNA	0.599074	0.922726	1.90684	0.0648816	0.703375
MIMAT0000141	mmu-miR-130a-3p	miRNA	0.594924	0.474275	2.81978	0.00790264	0.405116
MIMAT0020367	mmu-miR-3473b	miRNA	0.591831	3.31689	0.642818	0.524584	0.909112
MIMAT0003731	mmu-miR-671-5p	miRNA	0.573113	1.10396	1.34006	0.18897	0.835833
MIMAT0004626	mmu-miR-18a-3p	miRNA	0.572018	1.26842	1.13217	0.265357	0.842021
MIMAT0029831	mmu-miR-7662-3p	miRNA	0.569719	1.67765	0.919222	0.36435	0.868782
MIMAT0017277	mmu-miR-504-3p	miRNA	0.56584	0.744431	1.99616	0.053843	0.642078
MIMAT0028042	mmu-miR-7068-5p	miRNA	0.562996	0.444713	3.58995	0.00101493	0.161373
MIMAT0020637	mmu-miR-5126	miRNA	0.56037	10.5312	1.03124	0.309589	0.85284
MIMAT0000673	mmu-miR-181b-5p	miRNA	0.559706	1.7039	0.978817	0.334472	0.85284
MIMAT0027747	mmu-miR-6923-3p	miRNA	0.553723	1.02133	1.51495	0.138879	0.799951
MIMAT0000580	mmu-miR-148b-3p	miRNA	0.551488	0.787727	2.80878	0.00812497	0.405116
MIMAT0014810	mmu-miR-1298-3p	miRNA	0.549243	0.574557	2.06584	0.0464042	0.63459
MIMAT0028413	mmu-miR-7222-3p	miRNA	0.549007	0.773449	2.15209	0.0384587	0.616667
MIMAT0000656	mmu-miR-139-5p	miRNA	0.546	0.928997	1.13076	0.26594	0.842021
MIMAT0028072	mmu-miR-7083-5p	miRNA	0.544965	1.08603	1.6578	0.106409	0.752206
MIMAT0004643	mmu-miR-331-5p	miRNA	0.542278	0.954004	2.24172	0.0315037	0.591754
MIMAT0027746	mmu-miR-6923-5p	miRNA	0.53587	0.729404	2.01448	0.0517925	0.642078
MIMAT0027872	mmu-miR-6985-5p	miRNA	0.535741	0.747281	2.6327	0.0125769	0.463931
MIMAT0027936	mmu-miR-7016-5p	miRNA	0.522569	1.07294	0.95601	0.345707	0.857727
MIMAT0000523	mmu-let-7c-5p	miRNA	0.52249	7.65493	0.392379	0.697187	0.949725
MIMAT0024864	mmu-miR-6244	miRNA	0.512966	1.22972	1.21187	0.233782	0.842021
MIMAT0029850	mmu-miR-7672-5p	miRNA	0.507727	0.875664	2.34742	0.0247635	0.54469
MIMAT0028399	mmu-miR-7215-3p	miRNA	0.505913	0.647527	2.58298	0.0141928	0.48411
MIMAT0027984	mmu-miR-7040-5p	miRNA	0.50585	1.37408	1.21302	0.233347	0.842021
MIMAT0027792	mmu-miR-6946-5p	miRNA	0.503749	0.834437	2.54496	0.0155552	0.48411
MIMAT0027922	mmu-miR-7009-5p	miRNA	0.50265	1.22341	1.92793	0.0621134	0.693574
MIMAT0004894	mmu-miR-574-3p	miRNA	0.500498	0.689589	2.00499	0.0528466	0.642078
MIMAT0000530	mmu-miR-21a-5p	miRNA	0.492324	0.815288	1.0021	0.323258	0.85284
MIMAT0000609	mmu-miR-351-5p	miRNA	0.487618	1.28719	1.3287	0.192652	0.835833
MIMAT0027856	mmu-miR-6977-5p	miRNA	0.487392	0.923904	1.21433	0.232853	0.842021
MIMAT0029891	mmu-miR-7684-3p	miRNA	0.484261	1.12524	1.35312	0.184804	0.829524
MIMAT0014852	mmu-miR-3072-5p	miRNA	0.479788	1.05099	0.872779	0.388807	0.875302
MIMAT0028082	mmu-miR-7088-5p	miRNA	0.471187	1.0549	1.08404	0.285853	0.847779
MIMAT0009435	mmu-miR-1962	miRNA	0.470767	1.1228	1.39892	0.170746	0.820425
MIMAT0009398	mmu-miR-1934-5p	miRNA	0.467109	0.608856	2.81683	0.00796184	0.405116
MIMAT0007878	mmu-miR-1894-3p	miRNA	0.465808	1.61975	0.855275	0.398289	0.875302
MIMAT0017060	mmu-miR-221-5p	miRNA	0.464606	0.523284	3.30343	0.00222894	0.223832
MIMAT0022356	mmu-miR-5615-3p	miRNA	0.463157	0.316949	2.26496	0.0298948	0.585854
MIMAT0000160	mmu-miR-150-5p	miRNA	0.456974	3.02706	0.368132	0.71502	0.9566
MIMAT0029879	mmu-miR-3620-3p	miRNA	0.456897	1.24296	0.80795	0.424645	0.880009
MIMAT0004867	mmu-miR-327	miRNA	0.454953	0.44814	2.90246	0.00640522	0.393501
MIMAT0029883	mmu-miR-7681-3p	miRNA	0.453997	0.672762	1.92641	0.0623095	0.693574
MIMAT0014929	mmu-miR-344g-5p	miRNA	0.45038	0.695737	1.56671	0.126295	0.784921
MIMAT0004877	mmu-miR-466c-5p	miRNA	0.446951	0.783802	2.34118	0.025122	0.54469
MIMAT0027844	mmu-miR-6971-5p	miRNA	0.442227	1.06839	0.961169	0.343144	0.85284
MIMAT0025124	mmu-miR-6378	miRNA	0.438974	0.924718	0.925098	0.361329	0.868782
MIMAT0022365	mmu-miR-5619-5p	miRNA	0.436918	0.606208	2.53769	0.0158291	0.48411
MIMAT0000571	mmu-miR-331-3p	miRNA	0.435655	0.828462	1.60903	0.116708	0.758773
MIMAT0022989	mmu-miR-5134-3p	miRNA	0.433016	0.553706	2.96577	0.00544333	0.348422
MIMAT0027778	mmu-miR-6939-5p	miRNA	0.431914	1.35993	1.18447	0.244308	0.842021
MIMAT0027944	mmu-miR-7020-5p	miRNA	0.431911	1.10787	1.70181	0.0977717	0.752206
MIMAT0027868	mmu-miR-6983-5p	miRNA	0.430832	0.914982	0.826404	0.414244	0.878481
MIMAT0014936	mmu-miR-3102-3p	miRNA	0.426108	0.519171	2.99307	0.00507211	0.345628
MIMAT0000590	mmu-miR-342-3p	miRNA	0.418728	1.86015	0.442249	0.661064	0.942727
MIMAT0025112	mmu-miR-6368	miRNA	0.416464	0.79567	1.0674	0.293191	0.851053
MIMAT0029830	mmu-miR-7662-5p	miRNA	0.413964	0.941468	1.0693	0.292346	0.851053
MIMAT0027995	mmu-miR-7045-3p	miRNA	0.409826	1.98856	0.529606	0.599771	0.931962
MIMAT0005837	mmu-miR-1187	miRNA	0.406448	1.0075	1.2632	0.214971	0.838118
MIMAT0000138	mmu-miR-126a-3p	miRNA	0.40455	0.674933	1.82953	0.0759576	0.731955
MIMAT0017283	mmu-miR-598-5p	miRNA	0.403569	0.965171	1.22888	0.22742	0.842021
MIMAT0025110	mmu-miR-6366	miRNA	0.398755	3.84953	0.318906	0.751717	0.958886
MIMAT0027866	mmu-miR-6982-5p	miRNA	0.39856	0.932071	1.39273	0.172596	0.820425
MIMAT0009393	mmu-miR-1930-5p	miRNA	0.397116	1.01256	1.43264	0.160945	0.811401
MIMAT0027898	mmu-miR-6998-5p	miRNA	0.39652	0.571166	2.30668	0.0271898	0.569368
MIMAT0028038	mmu-miR-7067-5p	miRNA	0.396346	0.840581	1.29384	0.2043	0.838118
MIMAT0028136	mmu-miR-7119-3p	miRNA	0.39533	1.24796	0.633962	0.530279	0.909222
MIMAT0000513	mmu-miR-19b-3p	miRNA	0.393117	0.914075	0.631592	0.531809	0.909222
MIMAT0029815	mmu-miR-7654-3p	miRNA	0.392281	0.675574	2.09079	0.0439695	0.63459
MIMAT0022931	mmu-miR-702-5p	miRNA	0.386053	1.1156	0.974124	0.336764	0.85284
MIMAT0028034	mmu-miR-7065-5p	miRNA	0.381821	0.376138	2.62272	0.012887	0.463931
MIMAT0027718	mmu-miR-6909-5p	miRNA	0.381566	1.89955	0.545081	0.589198	0.926469
MIMAT0027748	mmu-miR-6924-5p	miRNA	0.375386	0.656225	1.92056	0.063068	0.693574
MIMAT0000654	mmu-miR-32-5p	miRNA	0.371496	0.62389	1.09178	0.282484	0.847658
MIMAT0004635	mmu-miR-92a-2-5p	miRNA	0.365981	0.984004	0.928699	0.359486	0.868782
MIMAT0029793	mmu-miR-6546-3p	miRNA	0.362394	0.476902	2.20918	0.0338864	0.591754
MIMAT0027722	mmu-miR-6911-5p	miRNA	0.361171	0.820788	1.78815	0.0825219	0.752206
MIMAT0019355	mmu-miR-3970	miRNA	0.360352	0.529836	2.51201	0.0168318	0.494467
MIMAT0020630	mmu-miR-5122	miRNA	0.359728	0.794996	0.757324	0.453988	0.890234
MIMAT0003505	mmu-miR-714	miRNA	0.358568	1.57422	0.734673	0.467495	0.894664
MIMAT0028066	mmu-miR-7080-5p	miRNA	0.353463	0.710183	1.84147	0.0741489	0.728602
MIMAT0017278	mmu-miR-92b-5p	miRNA	0.353428	0.837725	1.24607	0.221121	0.838118
MIMAT0000131	mmu-miR-99a-5p	miRNA	0.353308	0.538734	2.5384	0.0158019	0.48411
MIMAT0027904	mmu-miR-7001-5p	miRNA	0.353086	3.60342	0.358884	0.721865	0.9566
MIMAT0000248	mmu-miR-30e-5p	miRNA	0.351652	0.760136	0.872031	0.389209	0.875302
MIMAT0009412	mmu-miR-1946a	miRNA	0.350403	1.0212	1.41439	0.166192	0.815789
MIMAT0031418	mmu-miR-8112	miRNA	0.347143	0.575012	2.02678	0.050455	0.641787
MIMAT0027914	mmu-miR-7005-5p	miRNA	0.344011	1.03278	0.683831	0.498641	0.9008
MIMAT0025092	mmu-miR-6349	miRNA	0.340493	0.769564	0.920883	0.363495	0.868782
MIMAT0014870	mmu-miR-3081-5p	miRNA	0.332035	1.10243	1.06429	0.294578	0.851053
MIMAT0017077	mmu-miR-365-1-5p	miRNA	0.330279	1.12512	1.14752	0.25905	0.842021
MIMAT0017245	mmu-miR-760-5p	miRNA	0.317696	1.02849	1.11255	0.27358	0.842021
MIMAT0003507	mmu-miR-500-3p	miRNA	0.317672	1.40959	0.69911	0.489162	0.896561
MIMAT0019136	mmu-miR-1306-5p	miRNA	0.316579	0.824486	1.50747	0.140776	0.799951
MIMAT0027700	mmu-miR-6900-5p	miRNA	0.315999	0.978636	1.13909	0.262499	0.842021
MIMAT0017281	mmu-miR-511-3p	miRNA	0.315884	0.601166	2.17283	0.0367383	0.61067
MIMAT0031427	mmu-miR-3473g	miRNA	0.314891	1.23533	0.897875	0.375465	0.875302
MIMAT0027988	mmu-miR-7042-5p	miRNA	0.314029	0.34674	2.25625	0.0304885	0.585854
MIMAT0004893	mmu-miR-574-5p	miRNA	0.312872	1.71445	0.578569	0.566631	0.922867
MIMAT0028430	mmu-miR-7231-5p	miRNA	0.309584	1.0021	0.828756	0.412929	0.878481
MIMAT0014906	mmu-miR-3092-3p	miRNA	0.30641	0.647534	1.67119	0.103716	0.752206
MIMAT0000704	mmu-miR-361-5p	miRNA	0.303599	1.42657	0.522541	0.604627	0.933357
MIMAT0029797	mmu-miR-7647-3p	miRNA	0.302702	0.3535	2.6582	0.0118158	0.463931
MIMAT0014834	mmu-miR-3064-5p	miRNA	0.300529	0.53902	1.47069	0.150421	0.807309
MIMAT0017002	mmu-miR-204-3p	miRNA	0.300199	0.731594	1.44281	0.158077	0.807309
MIMAT0003166	mmu-miR-546	miRNA	0.298018	1.58793	0.584596	0.562617	0.922318
MIMAT0022373	mmu-miR-5623-5p	miRNA	0.295297	1.06932	1.26927	0.212825	0.838118
MIMAT0017282	mmu-miR-544-5p	miRNA	0.291913	0.381499	1.76242	0.0868415	0.752206
MIMAT0028045	mmu-miR-7069-3p	miRNA	0.291799	0.558028	1.79877	0.0807926	0.752206
MIMAT0016980	mmu-miR-23b-5p	miRNA	0.289334	0.646527	1.77467	0.0847615	0.752206
MIMAT0009427	mmu-miR-669n	miRNA	0.285994	1.15557	1.01504	0.317139	0.85284
MIMAT0017042	mmu-miR-351-3p	miRNA	0.285949	0.977888	0.866016	0.392454	0.875302
MIMAT0027752	mmu-miR-6926-5p	miRNA	0.285133	1.03596	0.7724	0.445128	0.890234
MIMAT0016998	mmu-miR-190a-3p	miRNA	0.282069	1.38158	0.401623	0.690434	0.947732
MIMAT0014822	mmu-miR-3057-5p	miRNA	0.281773	0.481577	1.55605	0.128807	0.787704
MIMAT0002109	mmu-miR-468-3p	miRNA	0.280172	0.54073	1.7588	0.0874644	0.752206
MIMAT0020644	mmu-miR-5133	miRNA	0.277342	0.659003	1.38901	0.173717	0.820425
MIMAT0031425	mmu-miR-8119	miRNA	0.277235	0.921495	0.884425	0.382578	0.875302
MIMAT0029804	mmu-miR-7651-5p	miRNA	0.276153	0.45213	1.74791	0.0893588	0.752206
MIMAT0027926	mmu-miR-7011-5p	miRNA	0.275588	1.27513	0.46794	0.642765	0.940964
MIMAT0004545	mmu-miR-200b-5p	miRNA	0.275298	0.721004	1.34773	0.186512	0.829524
MIMAT0003183	mmu-miR-376c-3p	miRNA	0.275129	0.585127	1.63054	0.112069	0.752206
MIMAT0027906	mmu-miR-7002-5p	miRNA	0.273785	1.27764	1.09162	0.282553	0.847658
MIMAT0000605	mmu-miR-350-3p	miRNA	0.273522	0.700978	1.07798	0.288511	0.851053
MIMAT0003483	mmu-miR-696	miRNA	0.273486	0.405278	1.92079	0.0630382	0.693574
MIMAT0031406	mmu-miR-8102	miRNA	0.271464	1.34867	0.845723	0.403525	0.87591
MIMAT0028447	mmu-miR-7239-3p	miRNA	0.270388	0.462997	1.81879	0.0776179	0.738649
MIMAT0003464	mmu-miR-686	miRNA	0.268915	0.904543	1.41514	0.165975	0.815789
MIMAT0025114	mmu-miR-6370	miRNA	0.268013	0.373451	2.67863	0.011237	0.463931
MIMAT0004574	mmu-miR-294-5p	miRNA	0.267172	0.396911	2.01528	0.051705	0.642078
MIMAT0024858	mmu-miR-6237	miRNA	0.267121	0.600937	2.11385	0.0418194	0.633265
MIMAT0027782	mmu-miR-6941-5p	miRNA	0.26614	1.12145	0.744631	0.461528	0.892494
MIMAT0028444	mmu-miR-7238-5p	miRNA	0.265263	3.29508	0.305616	0.76173	0.960596
MIMAT0017251	mmu-miR-669a-3-3p	miRNA	0.265099	0.442473	2.21722	0.0332837	0.591754
MIMAT0027779	mmu-miR-6939-3p	miRNA	0.265073	0.460368	2.13925	0.0395595	0.616667
MIMAT0027834	mmu-miR-6966-5p	miRNA	0.260547	0.269208	1.1905	0.241964	0.842021
MIMAT0027952	mmu-miR-7024-5p	miRNA	0.255463	0.698424	1.02714	0.311489	0.85284
MIMAT0027993	mmu-miR-7044-3p	miRNA	0.254725	0.43085	1.75903	0.0874239	0.752206
MIMAT0014858	mmu-miR-3075-5p	miRNA	0.252994	0.578717	1.67102	0.103751	0.752206
MIMAT0027734	mmu-miR-6917-5p	miRNA	0.245681	0.764272	1.28437	0.207555	0.838118
MIMAT0024857	mmu-miR-6236	miRNA	0.243132	0.605984	1.24926	0.219965	0.838118
MIMAT0028002	mmu-miR-7049-5p	miRNA	0.242984	0.595826	1.60915	0.11668	0.758773
MIMAT0029845	mmu-miR-7669-3p	miRNA	0.242429	2.46089	0.422809	0.675054	0.94567
MIMAT0009413	mmu-miR-1947-5p	miRNA	0.241789	0.8052	1.45057	0.155915	0.807309
MIMAT0029910	mmu-miR-7243-5p	miRNA	0.241303	0.550246	1.8529	0.0724508	0.728547
MIMAT0025076	mmu-miR-195b	miRNA	0.238189	0.668928	1.70621	0.0969409	0.752206
MIMAT0028451	mmu-miR-7241-3p	miRNA	0.236566	0.54626	1.84106	0.0742099	0.728602
MIMAT0017084	mmu-miR-181b-2-3p	miRNA	0.234579	0.703407	1.28768	0.206414	0.838118
MIMAT0028011	mmu-miR-7053-3p	miRNA	0.234178	0.485716	1.68347	0.101297	0.752206
MIMAT0028074	mmu-miR-7084-5p	miRNA	0.233735	0.216714	2.05571	0.0474267	0.63459
MIMAT0017257	mmu-miR-701-3p	miRNA	0.232585	0.472791	1.78401	0.0832049	0.752206
MIMAT0027769	mmu-miR-6934-3p	miRNA	0.22949	0.661656	0.925817	0.360961	0.868782
MIMAT0027964	mmu-miR-7030-5p	miRNA	0.228921	0.831835	0.867115	0.391859	0.875302
MIMAT0004525	mmu-miR-99b-3p	miRNA	0.227963	0.437074	2.25596	0.0305088	0.585854
MIMAT0027730	mmu-miR-6915-5p	miRNA	0.226766	0.530918	1.64047	0.109979	0.752206
MIMAT0027916	mmu-miR-7006-5p	miRNA	0.226565	0.514458	1.6134	0.115753	0.758773
MIMAT0027760	mmu-miR-6930-5p	miRNA	0.226448	0.890509	1.2889	0.205995	0.838118
MIMAT0028400	mmu-miR-7216-5p	miRNA	0.224651	1.00313	1.17714	0.247184	0.842021
MIMAT0027692	mmu-miR-6896-5p	miRNA	0.224513	0.807861	0.760661	0.452018	0.890234
MIMAT0000209	mmu-miR-129-5p	miRNA	0.223945	0.690138	1.08496	0.285449	0.847779
MIMAT0004576	mmu-miR-296-3p	miRNA	0.223152	0.591558	1.30096	0.201879	0.838118
MIMAT0002889	mmu-miR-532-5p	miRNA	0.223096	1.04471	0.540066	0.592615	0.927518
MIMAT0014843	mmu-miR-3068-3p	miRNA	0.222784	0.618008	1.19371	0.240722	0.842021
MIMAT0000520	mmu-miR-208a-3p	miRNA	0.222651	0.524765	1.71201	0.0958551	0.752206
MIMAT0025106	mmu-miR-6362	miRNA	0.222502	0.603763	1.50057	0.142549	0.799951
MIMAT0004651	mmu-miR-340-5p	miRNA	0.222236	0.599944	1.5797	0.123285	0.768718
MIMAT0027932	mmu-miR-7014-5p	miRNA	0.221817	0.791305	1.05182	0.300181	0.85284
MIMAT0007880	mmu-miR-1901	miRNA	0.220905	0.378218	1.91632	0.0636239	0.693682
MIMAT0031423	mmu-miR-8117	miRNA	0.220285	0.671848	1.44466	0.15756	0.807309
MIMAT0009417	mmu-miR-1950	miRNA	0.218191	0.600729	0.968453	0.339547	0.85284
MIMAT0028127	mmu-miR-7115-5p	miRNA	0.21811	0.578548	0.90915	0.369568	0.872129
MIMAT0027829	mmu-miR-6964-3p	miRNA	0.218011	0.464704	1.96585	0.0573907	0.675935
MIMAT0029903	mmu-miR-7687-3p	miRNA	0.216593	0.440531	1.68294	0.101401	0.752206
MIMAT0017340	mmu-miR-1930-3p	miRNA	0.216542	0.538521	1.66576	0.104801	0.752206
MIMAT0029842	mmu-miR-7668-5p	miRNA	0.21634	0.290548	1.70961	0.0963027	0.752206
MIMAT0001095	mmu-miR-370-3p	miRNA	0.215955	0.334826	1.51464	0.138957	0.799951
MIMAT0028039	mmu-miR-7067-3p	miRNA	0.215287	0.528713	1.47473	0.149337	0.807309
MIMAT0007873	mmu-miR-1896	miRNA	0.213819	0.822061	1.32845	0.192735	0.835833
MIMAT0016994	mmu-miR-129-1-3p	miRNA	0.211741	0.509034	1.40509	0.168921	0.820425
MIMAT0028392	mmu-miR-7212-5p	miRNA	0.211496	0.643963	1.20881	0.234941	0.842021
MIMAT0027890	mmu-miR-6994-5p	miRNA	0.210228	0.975133	0.881675	0.384043	0.875302
MIMAT0000586	mmu-miR-340-3p	miRNA	0.210193	0.640537	1.69526	0.099019	0.752206
MIMAT0027900	mmu-miR-6999-5p	miRNA	0.209676	0.786894	0.59429	0.556188	0.922318
MIMAT0022367	mmu-miR-5620-5p	miRNA	0.209376	0.491261	1.19138	0.241621	0.842021
MIMAT0022372	mmu-miR-5622-3p	miRNA	0.209366	1.37721	0.59839	0.553482	0.922318
MIMAT0027978	mmu-miR-7037-5p	miRNA	0.209189	0.732856	1.28174	0.208465	0.838118
MIMAT0027907	mmu-miR-7002-3p	miRNA	0.208016	0.667165	1.16984	0.250068	0.842021
MIMAT0025101	mmu-miR-6358	miRNA	0.207926	0.469074	1.50069	0.142517	0.799951
MIMAT0014882	mmu-miR-466m-5p	miRNA	0.207903	1.33147	0.762701	0.450816	0.890234
MIMAT0017346	mmu-miR-669m-5p	miRNA	0.207903	1.33147	0.762701	0.450816	0.890234
MIMAT0022988	mmu-miR-5132-3p	miRNA	0.206921	0.292343	1.85824	0.07167	0.728547
MIMAT0022357	mmu-miR-1231-5p	miRNA	0.206815	0.637189	1.06294	0.29518	0.851053
MIMAT0029839	mmu-miR-7666-3p	miRNA	0.206812	1.23006	0.597028	0.55438	0.922318
MIMAT0027982	mmu-miR-7039-5p	miRNA	0.206679	0.56329	1.16754	0.250983	0.842021
MIMAT0004642	mmu-miR-330-5p	miRNA	0.206186	0.317699	1.63745	0.110611	0.752206
MIMAT0000662	mmu-miR-216a-5p	miRNA	0.205672	0.544686	1.45634	0.154323	0.807309
MIMAT0025099	mmu-miR-6356	miRNA	0.205656	0.523479	1.20378	0.236855	0.842021
MIMAT0027910	mmu-miR-7003-5p	miRNA	0.20494	1.66478	0.406683	0.686748	0.947732
MIMAT0027908	mmu-miR-6973b-5p	miRNA	0.204795	0.728191	0.94794	0.349741	0.859931
MIMAT0022729	mmu-miR-1929-3p	miRNA	0.20413	0.341039	1.69844	0.0984115	0.752206
MIMAT0000366	mmu-miR-290a-5p	miRNA	0.203362	0.546438	1.32937	0.192435	0.835833
MIMAT0027787	mmu-miR-6943-3p	miRNA	0.202361	0.428117	1.73022	0.0925124	0.752206
MIMAT0003172	mmu-miR-542-3p	miRNA	0.201152	0.317728	1.44433	0.15765	0.807309
MIMAT0011212	mmu-miR-2136	miRNA	0.19968	0.543888	1.47043	0.150492	0.807309
MIMAT0029875	mmu-miR-7680-3p	miRNA	0.199335	0.322058	1.66711	0.10453	0.752206
MIMAT0003733	mmu-miR-665-3p	miRNA	0.198558	0.448593	1.72265	0.0938904	0.752206
MIMAT0000381	mmu-miR-34c-5p	miRNA	0.197366	0.520728	1.5038	0.141716	0.799951
MIMAT0028030	mmu-miR-7063-5p	miRNA	0.197351	0.499699	1.18221	0.245193	0.842021
MIMAT0022363	mmu-miR-5618-5p	miRNA	0.197093	0.422124	1.53895	0.132922	0.795034
MIMAT0004885	mmu-miR-467c-5p	miRNA	0.195903	0.408545	1.86912	0.0700988	0.728547
MIMAT0016993	mmu-miR-155-3p	miRNA	0.195407	0.650368	0.905218	0.371617	0.872129
MIMAT0004535	mmu-miR-150-3p	miRNA	0.195022	0.576646	1.09988	0.278988	0.843596
MIMAT0027735	mmu-miR-6917-3p	miRNA	0.194879	0.366006	1.21331	0.233237	0.842021
MIMAT0029873	mmu-miR-7679-3p	miRNA	0.194512	0.904819	0.724453	0.473663	0.896561
MIMAT0017260	mmu-miR-652-5p	miRNA	0.194506	0.430599	1.06153	0.295809	0.851053
MIMAT0005839	mmu-miR-669f-3p	miRNA	0.193748	0.562186	1.22997	0.227013	0.842021
MIMAT0025080	mmu-miR-6337	miRNA	0.193695	1.2669	0.864461	0.393295	0.875302
MIMAT0028052	mmu-miR-7073-5p	miRNA	0.193226	0.774828	1.01186	0.318637	0.85284
MIMAT0025176	mmu-miR-6420	miRNA	0.193129	0.535915	1.22222	0.229896	0.842021
MIMAT0028080	mmu-miR-7087-5p	miRNA	0.192949	0.614589	1.2491	0.220022	0.838118
MIMAT0000212	mmu-miR-183-5p	miRNA	0.191696	0.489938	1.31353	0.197659	0.838118
MIMAT0000588	mmu-miR-341-3p	miRNA	0.190622	0.543373	1.3507	0.185569	0.829524
MIMAT0003502	mmu-miR-712-5p	miRNA	0.189823	0.759361	1.17734	0.247104	0.842021
MIMAT0027839	mmu-miR-6968-3p	miRNA	0.187595	0.573439	1.13129	0.265723	0.842021
MIMAT0014878	mmu-miR-3085-5p	miRNA	0.186878	0.890833	0.986911	0.330545	0.85284
MIMAT0014927	mmu-miR-344c-5p	miRNA	0.186592	0.4583	1.33995	0.189004	0.835833
MIMAT0007877	mmu-miR-1894-5p	miRNA	0.186552	0.197875	1.24472	0.22161	0.838118
MIMAT0027918	mmu-miR-7007-5p	miRNA	0.184983	0.492836	1.38963	0.17353	0.820425
MIMAT0014912	mmu-miR-3095-3p	miRNA	0.184423	0.262046	1.83206	0.0755713	0.73193
MIMAT0028012	mmu-miR-7054-5p	miRNA	0.183562	0.683742	1.46049	0.153188	0.807309
MIMAT0003459	mmu-miR-682	miRNA	0.183241	0.666569	1.16531	0.251873	0.842021
MIMAT0027865	mmu-miR-6981-3p	miRNA	0.182416	0.663822	1.19275	0.241093	0.842021
MIMAT0019354	mmu-miR-28b	miRNA	0.181549	0.307469	1.10117	0.278432	0.843252
MIMAT0027755	mmu-miR-6927-3p	miRNA	0.181164	0.684723	0.972303	0.337656	0.85284
MIMAT0027845	mmu-miR-6971-3p	miRNA	0.180147	0.565528	1.41575	0.165798	0.815789
MIMAT0027943	mmu-miR-7019-3p	miRNA	0.179109	0.501394	1.01732	0.31607	0.85284
MIMAT0009426	mmu-miR-1955-5p	miRNA	0.178815	0.681877	0.960942	0.343256	0.85284
MIMAT0005845	mmu-miR-466k	miRNA	0.178071	0.458519	1.37563	0.177788	0.826691
MIMAT0022378	mmu-miR-5624-3p	miRNA	0.178046	0.6856	1.28037	0.208941	0.838118
MIMAT0027939	mmu-miR-7017-3p	miRNA	0.177295	0.474572	1.17171	0.249329	0.842021
MIMAT0028391	mmu-miR-7211-3p	miRNA	0.176432	0.468013	1.46627	0.151616	0.807309
MIMAT0019347	mmu-miR-3965	miRNA	0.176287	0.85005	0.93359	0.356992	0.868168
MIMAT0027825	mmu-miR-6962-3p	miRNA	0.175796	0.420112	1.37054	0.179354	0.828591
MIMAT0002106	mmu-miR-465a-5p	miRNA	0.175349	0.535543	1.23322	0.225816	0.841517
MIMAT0022385	mmu-miR-5627-5p	miRNA	0.175203	0.676778	0.87374	0.388291	0.875302
MIMAT0027814	mmu-miR-6957-5p	miRNA	0.174724	0.375636	1.27202	0.211858	0.838118
MIMAT0017327	mmu-miR-669f-5p	miRNA	0.173405	0.946997	0.474533	0.638105	0.940964
MIMAT0003499	mmu-miR-709	miRNA	0.173312	6.63719	0.108291	0.914391	0.983312
MIMAT0004524	mmu-miR-30b-3p	miRNA	0.173133	0.635436	1.20278	0.237237	0.842021
MIMAT0005849	mmu-miR-1191	miRNA	0.172543	0.544012	1.15799	0.254808	0.842021
MIMAT0022353	mmu-miR-3544-5p	miRNA	0.172135	0.603127	1.21299	0.23336	0.842021
MIMAT0027968	mmu-miR-7032-5p	miRNA	0.171602	0.49811	1.51186	0.13966	0.799951
MIMAT0017270	mmu-miR-18b-3p	miRNA	0.171148	0.580283	1.36003	0.182627	0.829524
MIMAT0029906	mmu-miR-7688-5p	miRNA	0.169879	1.00158	0.679431	0.50139	0.900803
MIMAT0025079	mmu-miR-6336	miRNA	0.16984	0.467723	1.06959	0.292219	0.851053
MIMAT0022375	mmu-miR-3073b-5p	miRNA	0.16961	0.221443	1.46091	0.153074	0.807309
MIMAT0014803	mmu-miR-1264-3p	miRNA	0.168943	0.167658	1.61626	0.11513	0.757477
MIMAT0027764	mmu-miR-6932-5p	miRNA	0.167031	0.561564	1.32847	0.192728	0.835833
MIMAT0005838	mmu-miR-669j	miRNA	0.16683	0.340619	1.11396	0.272984	0.842021
MIMAT0017324	mmu-miR-669d-3p	miRNA	0.164319	0.677504	0.853235	0.399404	0.875302
MIMAT0003735	mmu-miR-672-5p	miRNA	0.164163	0.46945	1.21877	0.231184	0.842021
MIMAT0027812	mmu-miR-6956-5p	miRNA	0.162767	0.938453	0.917683	0.365145	0.868782
MIMAT0022930	mmu-miR-698-5p	miRNA	0.162251	0.813243	0.800195	0.429064	0.88217
MIMAT0028016	mmu-miR-7056-5p	miRNA	0.161788	0.465054	1.24915	0.220003	0.838118
MIMAT0004217	mmu-miR-465a-3p	miRNA	0.161349	0.444569	1.11067	0.274377	0.842021
MIMAT0004872	mmu-miR-465b-3p	miRNA	0.161349	0.444569	1.11067	0.274377	0.842021
MIMAT0004874	mmu-miR-465c-3p	miRNA	0.161349	0.444569	1.11067	0.274377	0.842021
MIMAT0031394	mmu-miR-8093	miRNA	0.160522	0.626798	0.604197	0.549658	0.920323
MIMAT0020605	mmu-miR-5098	miRNA	0.159933	0.415727	1.19937	0.23854	0.842021
MIMAT0028425	mmu-miR-7228-3p	miRNA	0.159437	0.367633	1.00984	0.319591	0.85284
MIMAT0031397	mmu-miR-1291	miRNA	0.158792	0.919016	0.457384	0.650257	0.940964
MIMAT0000383	mmu-let-7d-5p	miRNA	0.157803	7.57235	0.110539	0.912622	0.983312
MIMAT0003189	mmu-miR-291b-5p	miRNA	0.157126	0.60723	0.659743	0.513791	0.907698
MIMAT0025089	mmu-miR-6346	miRNA	0.156652	0.312736	1.18824	0.242841	0.842021
MIMAT0004663	mmu-miR-200c-5p	miRNA	0.156585	0.443991	1.3513	0.185379	0.829524
MIMAT0004931	mmu-miR-466d-3p	miRNA	0.156531	0.750121	0.874907	0.387664	0.875302
MIMAT0027743	mmu-miR-6921-3p	miRNA	0.156416	0.410238	1.51726	0.138295	0.799951
MIMAT0004546	mmu-miR-202-5p	miRNA	0.155769	0.946983	0.511985	0.611918	0.936703
MIMAT0009446	mmu-miR-1971	miRNA	0.155351	0.743285	0.734758	0.467443	0.894664
MIMAT0027860	mmu-miR-6979-5p	miRNA	0.154936	0.250823	1.13678	0.263449	0.842021
MIMAT0011287	mmu-miR-2183	miRNA	0.154801	0.497279	1.26069	0.215866	0.838118
MIMAT0009425	mmu-miR-1954	miRNA	0.154336	0.354945	1.08817	0.284051	0.847779
MIMAT0009419	mmu-miR-669m-3p	miRNA	0.154135	0.510452	1.02866	0.310785	0.85284
MIMAT0029851	mmu-miR-7672-3p	miRNA	0.154066	0.566175	1.12087	0.270069	0.842021
MIMAT0014808	mmu-miR-344d-3p	miRNA	0.153884	0.422202	1.28925	0.205872	0.838118
MIMAT0017016	mmu-let-7e-3p	miRNA	0.153814	0.4612	0.919967	0.363967	0.868782
MIMAT0009416	mmu-miR-1949	miRNA	0.153602	0.600257	0.776624	0.442664	0.890234
MIMAT0025116	mmu-miR-6372	miRNA	0.15322	0.38084	1.19077	0.241859	0.842021
MIMAT0000158	mmu-miR-146a-5p	miRNA	0.150725	0.164103	1.37469	0.178077	0.826691
MIMAT0001422	mmu-miR-434-3p	miRNA	0.150148	0.821496	0.706958	0.484332	0.896561
MIMAT0027790	mmu-miR-6945-5p	miRNA	0.150027	0.631374	0.904541	0.371971	0.872129
MIMAT0031419	mmu-miR-8113	miRNA	0.149988	1.80545	0.246958	0.806402	0.96752
MIMAT0000143	mmu-miR-9-3p	miRNA	0.149445	0.647283	1.18951	0.242347	0.842021
MIMAT0025105	mmu-miR-145b	miRNA	0.14931	0.423017	1.26016	0.216055	0.838118
MIMAT0017343	mmu-miR-1947-3p	miRNA	0.148249	0.255894	1.15004	0.258023	0.842021
MIMAT0028032	mmu-miR-7064-5p	miRNA	0.148152	0.714202	0.632662	0.531118	0.909222
MIMAT0014919	mmu-miR-3100-5p	miRNA	0.147277	0.505199	0.871935	0.389261	0.875302
MIMAT0027797	mmu-miR-6948-3p	miRNA	0.147128	0.420916	1.12069	0.270146	0.842021
MIMAT0020611	mmu-miR-5104	miRNA	0.146227	0.593147	0.827113	0.413848	0.878481
MIMAT0004627	mmu-miR-20a-3p	miRNA	0.14401	0.627519	1.15648	0.255418	0.842021
MIMAT0027941	mmu-miR-7018-3p	miRNA	0.143942	0.509229	0.720585	0.47601	0.896561
MIMAT0014937	mmu-miR-3103-5p	miRNA	0.143863	0.530892	1.04002	0.305553	0.85284
MIMAT0027819	mmu-miR-6959-3p	miRNA	0.143368	0.411324	1.17882	0.246523	0.842021
MIMAT0015643	mmu-miR-3472	miRNA	0.143152	0.811749	0.30949	0.758807	0.960082
MIMAT0017038	mmu-miR-344-5p	miRNA	0.142674	0.602025	0.870532	0.390016	0.875302
MIMAT0027800	mmu-miR-6950-5p	miRNA	0.142284	0.257011	1.17173	0.249319	0.842021
MIMAT0020629	mmu-miR-5121	miRNA	0.140867	0.599124	0.547779	0.587364	0.926469
MIMAT0027835	mmu-miR-6966-3p	miRNA	0.140222	0.633694	0.970403	0.338588	0.85284
MIMAT0027852	mmu-miR-6975-5p	miRNA	0.139987	0.571839	0.871426	0.389535	0.875302
MIMAT0005846	mmu-miR-467f	miRNA	0.139941	0.538372	1.10413	0.277163	0.843252
MIMAT0014814	mmu-miR-3058-3p	miRNA	0.139868	0.920644	0.686704	0.496851	0.9008
MIMAT0029872	mmu-miR-7679-5p	miRNA	0.13975	0.498673	1.11552	0.272325	0.842021
MIMAT0025157	mmu-miR-6405	miRNA	0.139297	0.267387	1.1998	0.238378	0.842021
MIMAT0028412	mmu-miR-7222-5p	miRNA	0.138191	0.430562	1.31152	0.198327	0.838118
MIMAT0028131	mmu-miR-7117-5p	miRNA	0.137799	0.660423	0.834783	0.409573	0.878481
MIMAT0027343	mmu-miR-6516-5p	miRNA	0.137021	0.345819	0.904347	0.372072	0.872129
MIMAT0004938	mmu-miR-875-3p	miRNA	0.136663	0.636069	0.759038	0.452976	0.890234
MIMAT0028398	mmu-miR-7215-5p	miRNA	0.136466	0.408905	0.995301	0.326508	0.85284
MIMAT0028419	mmu-miR-7225-3p	miRNA	0.136407	0.172075	0.998282	0.325081	0.85284
MIMAT0024862	mmu-miR-6241	miRNA	0.136045	0.680585	0.583645	0.563249	0.922318
MIMAT0027339	mmu-miR-6481	miRNA	0.135919	0.307715	1.29525	0.203819	0.838118
MIMAT0003409	mmu-miR-467a-5p	miRNA	0.135744	0.346137	0.983004	0.332437	0.85284
MIMAT0000593	mmu-miR-344-3p	miRNA	0.135234	0.428288	0.88108	0.384361	0.875302
MIMAT0029877	mmu-miR-6715-3p	miRNA	0.134954	0.544102	0.897408	0.37571	0.875302
MIMAT0017262	mmu-miR-741-5p	miRNA	0.134108	0.659731	0.992283	0.327956	0.85284
MIMAT0000584	mmu-miR-339-5p	miRNA	0.133961	1.01324	0.421203	0.676215	0.94567
MIMAT0000234	mmu-miR-201-5p	miRNA	0.133904	0.571516	0.604704	0.549326	0.920323
MIMAT0029884	mmu-miR-7682-5p	miRNA	0.133861	0.656532	0.968281	0.339631	0.85284
MIMAT0003128	mmu-miR-485-5p	miRNA	0.133223	0.388769	0.849581	0.401405	0.87591
MIMAT0000147	mmu-miR-135a-5p	miRNA	0.133038	0.280055	1.13802	0.262938	0.842021
MIMAT0014918	mmu-miR-3098-3p	miRNA	0.132434	0.559055	0.692102	0.493497	0.900184
MIMAT0017017	mmu-let-7f-2-3p	miRNA	0.132282	0.576201	1.00892	0.320025	0.85284
MIMAT0000156	mmu-miR-144-3p	miRNA	0.132092	0.940932	0.351036	0.727692	0.9566
MIMAT0017194	mmu-miR-452-3p	miRNA	0.131387	0.30321	1.07088	0.291645	0.851053
MIMAT0028009	mmu-miR-7052-3p	miRNA	0.131287	0.411879	1.10582	0.276444	0.842579
MIMAT0027744	mmu-miR-6922-5p	miRNA	0.130773	0.881006	0.606319	0.548265	0.920323
MIMAT0022366	mmu-miR-5619-3p	miRNA	0.130291	0.440598	0.837809	0.407894	0.877762
MIMAT0027960	mmu-miR-7028-5p	miRNA	0.130074	0.728659	0.680795	0.500537	0.9008
MIMAT0027753	mmu-miR-6926-3p	miRNA	0.1288	0.201556	1.15981	0.254077	0.842021
MIMAT0022704	mmu-miR-489-5p	miRNA	0.128707	0.380316	1.1418	0.261386	0.842021
MIMAT0028418	mmu-miR-7225-5p	miRNA	0.127909	0.429141	0.998403	0.325023	0.85284
MIMAT0014907	mmu-miR-3093-5p	miRNA	0.127017	0.49653	0.893484	0.377777	0.875302
MIMAT0028417	mmu-miR-7224-3p	miRNA	0.126894	0.750434	0.820734	0.417423	0.879076
MIMAT0027871	mmu-miR-6984-3p	miRNA	0.126701	0.611951	0.967432	0.340049	0.85284
MIMAT0017046	mmu-miR-101b-5p	miRNA	0.126511	0.411199	1.00346	0.322614	0.85284
MIMAT0028452	mmu-miR-7242-5p	miRNA	0.126478	0.429797	1.04692	0.302401	0.85284
MIMAT0027887	mmu-miR-6992-3p	miRNA	0.126113	0.28005	1.09231	0.282252	0.847658
MIMAT0028439	mmu-miR-7235-3p	miRNA	0.125589	0.637843	0.862608	0.394299	0.875302
MIMAT0004843	mmu-miR-879-3p	miRNA	0.125377	0.478023	1.12135	0.269868	0.842021
MIMAT0014824	mmu-miR-1251-5p	miRNA	0.125224	0.490248	1.00413	0.322294	0.85284
MIMAT0000165	mmu-miR-155-5p	miRNA	0.125142	0.563043	0.727881	0.471589	0.896561
MIMAT0027902	mmu-miR-7000-5p	miRNA	0.124759	0.431611	1.07116	0.291522	0.851053
MIMAT0004661	mmu-miR-28a-3p	miRNA	0.124	0.288914	1.15649	0.255413	0.842021
MIMAT0017072	mmu-miR-217-3p	miRNA	0.123992	0.830184	0.827544	0.413606	0.878481
MIMAT0027720	mmu-miR-6910-5p	miRNA	0.123608	0.650925	0.5572	0.580982	0.92443
MIMAT0003739	mmu-miR-673-5p	miRNA	0.12352	0.426217	0.988194	0.329926	0.85284
MIMAT0017264	mmu-miR-181d-3p	miRNA	0.122595	0.839919	0.589039	0.559666	0.922318
MIMAT0000224	mmu-miR-194-5p	miRNA	0.121485	1.28048	0.231341	0.818414	0.968493
MIMAT0009394	mmu-miR-1931	miRNA	0.121372	4.8444	0.103381	0.918258	0.983361
MIMAT0029795	mmu-miR-7646-3p	miRNA	0.120597	0.329141	0.869249	0.390708	0.875302
MIMAT0007876	mmu-miR-1907	miRNA	0.120444	0.509005	0.965167	0.341166	0.85284
MIMAT0022361	mmu-miR-5617-5p	miRNA	0.120371	0.684719	0.632636	0.531135	0.909222
MIMAT0025109	mmu-miR-6365	miRNA	0.119988	0.49789	0.913288	0.367419	0.871042
MIMAT0005833	mmu-miR-669d-5p	miRNA	0.119754	0.449851	0.812287	0.422187	0.879576
MIMAT0014920	mmu-miR-3100-3p	miRNA	0.119729	0.445761	0.812691	0.421958	0.879576
MIMAT0000535	mmu-miR-29a-3p	miRNA	0.119051	1.37018	0.153238	0.879102	0.982453
MIMAT0025082	mmu-miR-6339	miRNA	0.118339	0.546337	0.729128	0.470836	0.896561
MIMAT0004759	mmu-miR-466a-5p	miRNA	0.117724	0.302798	0.894002	0.377504	0.875302
MIMAT0025134	mmu-miR-6387	miRNA	0.117349	0.370947	0.803504	0.427176	0.881752
MIMAT0000211	mmu-miR-182-5p	miRNA	0.117285	0.784396	0.743849	0.461995	0.892494
MIMAT0027836	mmu-miR-6967-5p	miRNA	0.117095	0.557974	0.61202	0.54453	0.918623
MIMAT0014940	mmu-miR-3104-3p	miRNA	0.117043	0.448308	0.982586	0.33264	0.85284
MIMAT0001421	mmu-miR-434-5p	miRNA	0.116962	0.169364	0.874952	0.38764	0.875302
MIMAT0009408	mmu-miR-1943-5p	miRNA	0.115474	0.579568	0.713999	0.480022	0.896561
MIMAT0027784	mmu-miR-6942-5p	miRNA	0.115458	0.522526	0.858416	0.396577	0.875302
MIMAT0028402	mmu-miR-7217-5p	miRNA	0.115105	0.665238	0.773251	0.44463	0.890234
MIMAT0004531	mmu-miR-135a-1-3p	miRNA	0.115075	0.557118	0.640168	0.526285	0.909112
MIMAT0001418	mmu-miR-431-5p	miRNA	0.114956	0.54842	0.951801	0.347807	0.858031
MIMAT0015642	mmu-miR-3471	miRNA	0.114773	0.462639	0.621151	0.538576	0.913772
MIMAT0028095	mmu-miR-7094-3p	miRNA	0.114312	0.641562	0.769661	0.44673	0.890234
MIMAT0027701	mmu-miR-6900-3p	miRNA	0.113455	0.262442	0.855937	0.397928	0.875302
MIMAT0004530	mmu-miR-127-5p	miRNA	0.112888	0.484359	0.905495	0.371472	0.872129
MIMAT0014916	mmu-miR-3097-3p	miRNA	0.112352	0.555073	0.961864	0.3428	0.85284
MIMAT0017333	mmu-miR-1199-3p	miRNA	0.111894	0.461589	0.563449	0.576767	0.92399
MIMAT0017000	mmu-miR-195a-3p	miRNA	0.111119	0.947959	0.542631	0.590866	0.926469
MIMAT0017058	mmu-miR-26a-2-3p	miRNA	0.111031	0.35412	0.833048	0.410538	0.878481
MIMAT0004668	mmu-miR-138-1-3p	miRNA	0.110945	0.713306	0.721166	0.475658	0.896561
MIMAT0029803	mmu-miR-7650-3p	miRNA	0.110366	0.405048	0.76928	0.446953	0.890234
MIMAT0004660	mmu-miR-19a-5p	miRNA	0.109923	0.315725	0.761873	0.451304	0.890234
MIMAT0028421	mmu-miR-7226-3p	miRNA	0.109299	0.505096	0.870354	0.390112	0.875302
MIMAT0005844	mmu-miR-466f	miRNA	0.108772	0.628781	0.471412	0.640309	0.940964
MIMAT0004930	mmu-miR-466d-5p	miRNA	0.108484	0.449458	0.86027	0.395569	0.875302
MIMAT0027863	mmu-miR-6980-3p	miRNA	0.108275	0.316718	0.870126	0.390235	0.875302
MIMAT0029802	mmu-miR-7650-5p	miRNA	0.10791	0.28749	0.844716	0.404079	0.876117
MIMAT0004617	mmu-miR-148a-5p	miRNA	0.107819	0.498578	0.92419	0.361795	0.868782
MIMAT0029862	mmu-miR-129b-5p	miRNA	0.107756	0.336718	0.887347	0.381026	0.875302
MIMAT0014953	mmu-miR-374c-5p	miRNA	0.107035	0.447598	0.967244	0.340142	0.85284
MIMAT0028047	mmu-miR-7070-3p	miRNA	0.10689	0.495334	0.911372	0.368412	0.871042
MIMAT0029882	mmu-miR-7681-5p	miRNA	0.106432	0.449236	0.842192	0.405471	0.877008
MIMAT0025582	mmu-miR-6537-3p	miRNA	0.105957	0.373165	0.832082	0.411075	0.878481
MIMAT0029808	mmu-miR-7036b-5p	miRNA	0.105301	0.165793	0.718565	0.477239	0.896561
MIMAT0004519	mmu-let-7g-3p	miRNA	0.104955	0.530744	0.885247	0.382141	0.875302
MIMAT0028132	mmu-miR-7117-3p	miRNA	0.104428	0.837663	0.538622	0.5936	0.927518
MIMAT0028409	mmu-miR-7220-3p	miRNA	0.104331	0.822417	0.559122	0.579684	0.92443
MIMAT0014961	mmu-miR-344d-2-5p	miRNA	0.1041	0.780468	0.640478	0.526086	0.909112
MIMAT0000742	mmu-miR-378a-5p	miRNA	0.103992	1.0398	0.25016	0.803945	0.96752
MIMAT0028396	mmu-miR-7214-5p	miRNA	0.103626	0.39571	1.02694	0.311581	0.85284
MIMAT0025178	mmu-miR-451b	miRNA	0.103179	0.44227	0.775738	0.44318	0.890234
MIMAT0027737	mmu-miR-6918-3p	miRNA	0.10299	0.470705	0.817045	0.419499	0.879341
MIMAT0027768	mmu-miR-6934-5p	miRNA	0.102912	0.437546	0.666204	0.509703	0.905506
MIMAT0028423	mmu-miR-7227-3p	miRNA	0.10237	0.508024	0.867119	0.391857	0.875302
MIMAT0005831	mmu-miR-669k-3p	miRNA	0.102319	0.620195	0.650406	0.519731	0.909112
MIMAT0027732	mmu-miR-6916-5p	miRNA	0.102309	0.454959	0.700292	0.488432	0.896561
MIMAT0027697	mmu-miR-6898-3p	miRNA	0.101944	0.39656	0.810044	0.423457	0.880009
MIMAT0000136	mmu-miR-125b-5p	miRNA	0.101814	0.840884	0.437601	0.664398	0.94391
MIMAT0025102	mmu-miR-6359	miRNA	0.101384	0.525041	0.832281	0.410964	0.878481
MIMAT0005438	mmu-miR-30c-2-3p	miRNA	0.101133	0.541898	0.774735	0.443764	0.890234
MIMAT0004533	mmu-miR-141-5p	miRNA	0.100924	0.526222	0.713229	0.480493	0.896561
MIMAT0020642	mmu-miR-5131	miRNA	0.100912	0.511591	0.934014	0.356777	0.868168
MIMAT0005843	mmu-miR-1188-5p	miRNA	0.100848	0.592814	0.412664	0.682402	0.947732
MIMAT0020621	mmu-miR-5113	miRNA	0.0999178	0.849594	0.47091	0.640664	0.940964
MIMAT0019352	mmu-miR-3968	miRNA	0.09948	0.781884	0.572023	0.571009	0.922867
MIMAT0000137	mmu-miR-126a-5p	miRNA	0.0991218	0.614277	0.574873	0.569101	0.922867
MIMAT0014806	mmu-miR-1843a-3p	miRNA	0.0990709	0.567753	0.63934	0.526817	0.909112
MIMAT0009459	mmu-miR-1982-5p	miRNA	0.0985122	0.737289	0.455882	0.651326	0.940964
MIMAT0027742	mmu-miR-6921-5p	miRNA	0.0985011	0.996758	0.401693	0.690383	0.947732
MIMAT0025122	mmu-miR-6377	miRNA	0.098376	0.656992	0.718978	0.476988	0.896561
MIMAT0004890	mmu-miR-509-5p	miRNA	0.0976817	0.0610089	0.883298	0.383178	0.875302
MIMAT0020615	mmu-miR-5107-5p	miRNA	0.0968674	1.29326	0.212417	0.833029	0.968879
MIMAT0029870	mmu-miR-7678-5p	miRNA	0.0955337	0.707201	0.587153	0.560917	0.922318
MIMAT0017284	mmu-miR-653-3p	miRNA	0.0953622	0.225508	0.961577	0.342942	0.85284
MIMAT0005448	mmu-miR-467b-5p	miRNA	0.0951343	0.269853	0.838398	0.407568	0.877762
MIMAT0004862	mmu-miR-877-3p	miRNA	0.0948769	0.628647	0.521028	0.60567	0.93421
MIMAT0000150	mmu-miR-138-5p	miRNA	0.0943271	0.12098	0.878236	0.385881	0.875302
MIMAT0014956	mmu-miR-3112-3p	miRNA	0.0941937	0.334937	0.756479	0.454488	0.890234
MIMAT0000123	mmu-miR-1a-3p	miRNA	0.0939956	0.601234	0.754181	0.455848	0.890234
MIMAT0025139	mmu-miR-6390	miRNA	0.0935956	0.602964	0.706641	0.484527	0.896561
MIMAT0028446	mmu-miR-7239-5p	miRNA	0.092062	0.274277	0.807706	0.424784	0.880009
MIMAT0014923	mmu-miR-344e-5p	miRNA	0.0917237	0.344715	0.460528	0.648022	0.940964
MIMAT0022383	mmu-miR-344h-5p	miRNA	0.0917237	0.344715	0.460528	0.648022	0.940964
MIMAT0009460	mmu-miR-1982-3p	miRNA	0.0908256	0.362287	1.01945	0.315074	0.85284
MIMAT0031391	mmu-miR-8090	miRNA	0.0896329	0.403008	0.792568	0.433436	0.884982
MIMAT0003450	mmu-miR-488-3p	miRNA	0.089184	0.43983	0.793952	0.432641	0.884758
MIMAT0025135	mmu-miR-6388	miRNA	0.0881452	1.17719	0.264466	0.792992	0.96752
MIMAT0009430	mmu-miR-1957a	miRNA	0.087814	0.811304	0.330759	0.742824	0.9566
MIMAT0005291	mmu-miR-582-5p	miRNA	0.0877295	0.652989	0.581607	0.564606	0.922318
MIMAT0017330	mmu-miR-669e-3p	miRNA	0.0876288	0.495568	0.595618	0.555311	0.922318
MIMAT0004575	mmu-miR-295-5p	miRNA	0.0871713	0.331177	0.759719	0.452574	0.890234
MIMAT0027772	mmu-miR-6936-5p	miRNA	0.087129	0.418129	0.707435	0.484039	0.896561
MIMAT0027934	mmu-miR-7015-5p	miRNA	0.0869818	0.311251	0.706511	0.484607	0.896561
MIMAT0016984	mmu-miR-132-5p	miRNA	0.0862325	0.423268	0.699855	0.488702	0.896561
MIMAT0017070	mmu-miR-7a-2-3p	miRNA	0.0862192	0.692991	0.501239	0.619381	0.93792
MIMAT0027881	mmu-miR-6989-3p	miRNA	0.0861152	0.41183	0.74282	0.46261	0.892494
MIMAT0029858	mmu-miR-7675-5p	miRNA	0.085712	0.607967	0.437126	0.664739	0.94391
MIMAT0025144	mmu-miR-6394	miRNA	0.0856166	0.81914	0.528828	0.600305	0.931962
MIMAT0031413	mmu-miR-8108	miRNA	0.0850256	0.803285	0.453405	0.653091	0.942585
MIMAT0029876	mmu-miR-6715-5p	miRNA	0.0850123	0.591211	0.614043	0.543208	0.918017
MIMAT0017342	mmu-miR-1943-3p	miRNA	0.0848487	0.209006	0.683478	0.498861	0.9008
MIMAT0017246	mmu-miR-677-3p	miRNA	0.0847067	1.21868	0.155599	0.877254	0.982453
MIMAT0027794	mmu-miR-6947-5p	miRNA	0.0846859	0.426992	0.716993	0.478196	0.896561
MIMAT0027880	mmu-miR-6989-5p	miRNA	0.0842476	0.840624	0.356937	0.723309	0.9566
MIMAT0000370	mmu-miR-292-3p	miRNA	0.0840976	0.6498	0.511566	0.612208	0.936703
MIMAT0017174	mmu-miR-370-5p	miRNA	0.0839394	0.421592	0.764107	0.449989	0.890234
MIMAT0014832	mmu-miR-3063-5p	miRNA	0.0836793	0.109726	0.891207	0.378981	0.875302
MIMAT0003493	mmu-miR-703	miRNA	0.0836359	0.580301	0.674863	0.504253	0.902546
MIMAT0028050	mmu-miR-7072-5p	miRNA	0.0836243	0.716607	0.364111	0.717993	0.9566
MIMAT0027785	mmu-miR-6942-3p	miRNA	0.0831472	0.0617435	0.729372	0.470688	0.896561
MIMAT0029868	mmu-miR-7677-5p	miRNA	0.0831073	0.864683	0.33776	0.737587	0.9566
MIMAT0027725	mmu-miR-6912-3p	miRNA	0.0831008	0.392834	0.555366	0.582221	0.92443
MIMAT0004839	mmu-miR-743b-5p	miRNA	0.0820916	0.491296	0.564776	0.575874	0.923589
MIMAT0014868	mmu-miR-3080-5p	miRNA	0.0817897	0.556226	0.544315	0.589719	0.926469
MIMAT0004669	mmu-miR-125b-1-3p	miRNA	0.0813623	0.49338	0.575359	0.568776	0.922867
MIMAT0025168	mmu-miR-6414	miRNA	0.0810982	0.471734	0.572482	0.570701	0.922867
MIMAT0004542	mmu-miR-191-3p	miRNA	0.081029	0.249844	0.740943	0.463733	0.892494
MIMAT0025121	mmu-miR-21b	miRNA	0.0809211	0.323919	0.606051	0.548441	0.920323
MIMAT0017050	mmu-miR-32-3p	miRNA	0.0804002	0.413774	0.604837	0.549238	0.920323
MIMAT0027966	mmu-miR-7031-5p	miRNA	0.0803337	0.575814	0.496494	0.622689	0.939782
MIMAT0027867	mmu-miR-6982-3p	miRNA	0.0803042	0.332319	0.595435	0.555432	0.922318
MIMAT0017235	mmu-miR-758-5p	miRNA	0.079993	0.513043	0.646162	0.522442	0.909112
MIMAT0029867	mmu-miR-1191b-3p	miRNA	0.0796713	0.374287	0.655894	0.516235	0.909112
MIMAT0028084	mmu-miR-7089-5p	miRNA	0.079506	0.668467	0.652446	0.51843	0.909112
MIMAT0022837	mmu-miR-299b-3p	miRNA	0.0794917	0.283763	0.661658	0.512578	0.907235
MIMAT0017073	mmu-miR-194-2-3p	miRNA	0.0787395	0.541317	0.498932	0.620988	0.93812
MIMAT0015645	mmu-miR-3473a	miRNA	0.0784017	1.60915	0.195617	0.846056	0.974982
MIMAT0004324	mmu-miR-181d-5p	miRNA	0.0782428	0.782939	0.232617	0.817431	0.968493
MIMAT0014899	mmu-miR-3089-5p	miRNA	0.078214	0.396799	0.629676	0.533048	0.910012
MIMAT0027892	mmu-miR-6995-5p	miRNA	0.078061	0.578661	0.459131	0.649015	0.940964
MIMAT0028054	mmu-miR-7074-5p	miRNA	0.0780542	0.717921	0.445679	0.658609	0.942727
MIMAT0014865	mmu-miR-3078-3p	miRNA	0.0780096	0.324512	0.798164	0.430225	0.882656
MIMAT0000667	mmu-miR-33-5p	miRNA	0.0776853	0.351612	0.586189	0.561558	0.922318
MIMAT0014857	mmu-miR-3074-1-3p	miRNA	0.07712	0.635335	0.221626	0.825909	0.968879
MIMAT0020627	mmu-miR-5119	miRNA	0.0769538	0.798233	0.215678	0.830506	0.968879
MIMAT0027999	mmu-miR-7047-3p	miRNA	0.076797	0.663863	0.458719	0.649308	0.940964
MIMAT0000548	mmu-miR-322-5p	miRNA	0.0766881	0.264961	0.841471	0.405869	0.877008
MIMAT0004628	mmu-miR-21a-3p	miRNA	0.0765857	0.565498	0.458642	0.649363	0.940964
MIMAT0014942	mmu-miR-3105-3p	miRNA	0.0764092	0.573554	0.532724	0.597634	0.931962
MIMAT0017081	mmu-miR-381-5p	miRNA	0.0761347	0.617068	0.545665	0.588801	0.926469
MIMAT0016982	mmu-miR-128-1-5p	miRNA	0.0759073	0.417305	0.662727	0.511901	0.906878
MIMAT0028059	mmu-miR-7076-3p	miRNA	0.0757245	0.228896	0.815383	0.420437	0.879341
MIMAT0014837	mmu-miR-3065-3p	miRNA	0.0756794	0.194973	0.796348	0.431266	0.882892
MIMAT0003470	mmu-miR-691	miRNA	0.075668	0.410848	0.549428	0.586245	0.926469
MIMAT0028023	mmu-miR-7059-3p	miRNA	0.0753907	0.726018	0.485165	0.630621	0.940964
MIMAT0004541	mmu-miR-188-3p	miRNA	0.0752881	0.569206	0.502185	0.618722	0.93792
MIMAT0009422	mmu-miR-1951	miRNA	0.0752049	0.494878	0.581949	0.564378	0.922318
MIMAT0000747	mmu-miR-382-5p	miRNA	0.0748279	0.481712	0.475459	0.637451	0.940964
MIMAT0004895	mmu-miR-590-5p	miRNA	0.0748076	0.278529	0.625971	0.535446	0.911357
MIMAT0027915	mmu-miR-7005-3p	miRNA	0.0740661	0.272601	0.595434	0.555432	0.922318
MIMAT0027920	mmu-miR-7008-5p	miRNA	0.0738924	0.751896	0.468812	0.642148	0.940964
MIMAT0029824	mmu-miR-7659-5p	miRNA	0.0733485	0.4367	0.650002	0.519988	0.909112
MIMAT0003184	mmu-miR-487b-3p	miRNA	0.0729345	0.271963	0.652072	0.518668	0.909112
MIMAT0031417	mmu-miR-8111	miRNA	0.0727388	0.485204	0.576283	0.568158	0.922867
MIMAT0027809	mmu-miR-6954-3p	miRNA	0.0726885	0.681318	0.486664	0.629568	0.940964
MIMAT0009431	mmu-miR-1958	miRNA	0.0722897	0.359377	0.609196	0.546379	0.920323
MIMAT0009436	mmu-miR-1963	miRNA	0.072274	0.63115	0.483318	0.631918	0.940964
MIMAT0014816	mmu-miR-3099-3p	miRNA	0.0715759	0.389254	0.603862	0.549879	0.920323
MIMAT0000616	mmu-miR-101b-3p	miRNA	0.0715299	0.513776	0.682625	0.499394	0.9008
MIMAT0005293	mmu-miR-467e-5p	miRNA	0.071386	0.714887	0.455813	0.651375	0.940964
MIMAT0029810	mmu-miR-7652-5p	miRNA	0.0711698	0.227915	0.703349	0.48655	0.896561
MIMAT0027959	mmu-miR-7027-3p	miRNA	0.0707867	0.41955	0.489144	0.627829	0.940964
MIMAT0014838	mmu-miR-3066-5p	miRNA	0.0706164	0.243398	0.852324	0.399902	0.875302
MIMAT0004583	mmu-miR-130b-5p	miRNA	0.0700471	0.41856	0.516287	0.608942	0.935208
MIMAT0029814	mmu-miR-7654-5p	miRNA	0.0698252	0.538219	0.542523	0.590939	0.926469
MIMAT0017079	mmu-miR-377-5p	miRNA	0.0696438	0.346851	0.582262	0.564169	0.922318
MIMAT0017231	mmu-miR-1224-3p	miRNA	0.0694907	0.810466	0.348728	0.729409	0.9566
MIMAT0022362	mmu-miR-5617-3p	miRNA	0.0690844	0.503629	0.473081	0.63913	0.940964
MIMAT0000678	mmu-miR-7b-5p	miRNA	0.0687881	0.550295	0.447238	0.657494	0.942727
MIMAT0003486	mmu-miR-491-5p	miRNA	0.0681463	0.768263	0.246184	0.806996	0.96752
MIMAT0028057	mmu-miR-7075-3p	miRNA	0.0680066	0.364959	0.471559	0.640205	0.940964
MIMAT0004653	mmu-miR-342-5p	miRNA	0.0679974	0.425958	0.424016	0.674181	0.94567
MIMAT0000542	mmu-miR-34a-5p	miRNA	0.0679738	0.435646	0.51907	0.60702	0.934782
MIMAT0000516	mmu-miR-148a-3p	miRNA	0.0678684	0.563686	0.444763	0.659264	0.942727
MIMAT0025086	mmu-miR-6343	miRNA	0.0677232	0.535309	0.459907	0.648463	0.940964
MIMAT0025158	mmu-miR-496b	miRNA	0.0672194	0.35823	0.559922	0.579144	0.92443
MIMAT0027870	mmu-miR-6984-5p	miRNA	0.0671942	0.862579	0.2744	0.785411	0.96752
MIMAT0004850	mmu-miR-883b-5p	miRNA	0.0671936	0.656147	0.489871	0.62732	0.940964
MIMAT0014827	mmu-miR-3060-3p	miRNA	0.066934	0.140737	0.431988	0.668433	0.945419
MIMAT0028060	mmu-miR-7077-5p	miRNA	0.0666887	0.442203	0.352726	0.726436	0.9566
MIMAT0028008	mmu-miR-7052-5p	miRNA	0.0666243	1.38781	0.126828	0.899812	0.983312
MIMAT0014855	mmu-miR-3073a-3p	miRNA	0.0661909	0.446256	0.55163	0.584751	0.925129
MIMAT0014867	mmu-miR-3079-3p	miRNA	0.0659753	0.426444	0.552562	0.58412	0.924896
MIMAT0022371	mmu-miR-5622-5p	miRNA	0.0658919	0.523257	0.478365	0.635403	0.940964
MIMAT0014946	mmu-miR-3074-2-3p	miRNA	0.0655678	0.538579	0.465791	0.644287	0.940964
MIMAT0020633	mmu-miR-5123	miRNA	0.065208	0.206569	0.680804	0.500531	0.9008
MIMAT0029846	mmu-miR-7670-5p	miRNA	0.0648333	0.553231	0.386799	0.701277	0.949725
MIMAT0022376	mmu-miR-3073b-3p	miRNA	0.0642807	0.43191	0.554428	0.582856	0.92443
MIMAT0014952	mmu-miR-3110-3p	miRNA	0.0641457	0.515427	0.352856	0.726339	0.9566
MIMAT0029909	mmu-miR-7689-3p	miRNA	0.0639217	0.572325	0.417215	0.679101	0.947167
MIMAT0025088	mmu-miR-6345	miRNA	0.0637046	0.695732	0.460549	0.648007	0.940964
MIMAT0028426	mmu-miR-7229-5p	miRNA	0.0633689	0.654828	0.436224	0.665387	0.94391
MIMAT0025588	mmu-miR-6541	miRNA	0.0633598	0.25349	0.635451	0.529319	0.909222
MIMAT0014891	mmu-miR-466p-5p	miRNA	0.0633174	0.658869	0.451324	0.654576	0.942727
MIMAT0027786	mmu-miR-6943-5p	miRNA	0.0629479	0.646853	0.366625	0.716134	0.9566
MIMAT0000672	mmu-miR-199b-5p	miRNA	0.0622824	0.407535	0.578477	0.566693	0.922867
MIMAT0001342	mmu-miR-425-3p	miRNA	0.0620617	1.12474	0.180072	0.858147	0.97813
MIMAT0003737	mmu-miR-666-5p	miRNA	0.0613929	0.274956	0.663925	0.511143	0.906377
MIMAT0014958	mmu-miR-1912-3p	miRNA	0.0604113	0.16218	0.567159	0.574272	0.923589
MIMAT0009391	mmu-miR-1928	miRNA	0.0600786	0.456886	0.492877	0.625216	0.940964
MIMAT0014904	mmu-miR-3091-3p	miRNA	0.0598928	0.362005	0.410858	0.683713	0.947732
MIMAT0004644	mmu-miR-337-5p	miRNA	0.0597947	0.447768	0.339571	0.736234	0.9566
MIMAT0020606	mmu-miR-5099	miRNA	0.0595505	0.322973	0.360287	0.720825	0.9566
MIMAT0009433	mmu-miR-1960	miRNA	0.0595207	0.374789	0.455674	0.651475	0.940964
MIMAT0003896	mmu-miR-763	miRNA	0.0593739	0.473035	0.411183	0.683477	0.947732
MIMAT0028450	mmu-miR-7241-5p	miRNA	0.0575918	0.871054	0.279664	0.781402	0.965765
MIMAT0003473	mmu-miR-133a-5p	miRNA	0.0569233	0.463208	0.502455	0.618534	0.93792
MIMAT0014801	mmu-miR-1247-3p	miRNA	0.0568823	1.29442	0.125398	0.900935	0.983312
MIMAT0025172	mmu-miR-6417	miRNA	0.0565714	0.400373	0.50435	0.617216	0.93792
MIMAT0022360	mmu-miR-5616-3p	miRNA	0.0558695	0.425446	0.404159	0.688586	0.947732
MIMAT0014902	mmu-miR-3090-3p	miRNA	0.0557687	0.476415	0.45083	0.654928	0.942727
MIMAT0020614	mmu-miR-3473c	miRNA	0.055575	0.540784	0.314946	0.754696	0.958886
MIMAT0017236	mmu-miR-551b-5p	miRNA	0.0555097	0.538369	0.369089	0.714313	0.9566
MIMAT0028415	mmu-miR-7223-3p	miRNA	0.0553905	0.363959	0.461951	0.647011	0.940964
MIMAT0004630	mmu-miR-26b-3p	miRNA	0.0552907	0.69046	0.387832	0.700519	0.949725
MIMAT0027929	mmu-miR-7012-3p	miRNA	0.055138	0.444282	0.543778	0.590085	0.926469
MIMAT0014850	mmu-miR-3071-5p	miRNA	0.0548621	0.390464	0.41912	0.677722	0.945935
MIMAT0003181	mmu-miR-367-3p	miRNA	0.0548621	0.268023	0.448132	0.656854	0.942727
MIMAT0027823	mmu-miR-6961-3p	miRNA	0.0544611	0.229661	0.426059	0.672707	0.94567
MIMAT0009457	mmu-miR-1839-3p	miRNA	0.0543764	0.316379	0.565221	0.575575	0.923589
MIMAT0020635	mmu-miR-5125	miRNA	0.0543629	0.259962	0.473544	0.638803	0.940964
MIMAT0003373	mmu-miR-302b-5p	miRNA	0.0540202	0.513991	0.404624	0.688247	0.947732
MIMAT0025177	mmu-miR-873b	miRNA	0.0534566	0.136668	0.433019	0.667692	0.945071
MIMAT0000153	mmu-miR-141-3p	miRNA	0.0533579	0.506863	0.408389	0.685508	0.947732
MIMAT0017007	mmu-miR-298-3p	miRNA	0.0529528	0.242688	0.400588	0.691189	0.948084
MIMAT0027946	mmu-miR-7021-5p	miRNA	0.0529286	0.327529	0.495944	0.623073	0.939782
MIMAT0022384	mmu-miR-344h-3p	miRNA	0.0528416	0.590488	0.424384	0.673916	0.94567
MIMAT0004649	mmu-miR-339-3p	miRNA	0.0523772	0.385446	0.2542	0.800847	0.96752
MIMAT0004849	mmu-miR-883a-3p	miRNA	0.0519398	0.55347	0.380294	0.706054	0.952724
MIMAT0027955	mmu-miR-7025-3p	miRNA	0.0516847	0.75558	0.245153	0.807788	0.96752
MIMAT0027759	mmu-miR-6929-3p	miRNA	0.0510511	0.5675	0.28963	0.77383	0.963488
MIMAT0009404	mmu-miR-1940	miRNA	0.0508213	0.448441	0.164168	0.870555	0.98169
MIMAT0028007	mmu-miR-7051-3p	miRNA	0.0507115	0.353823	0.44417	0.659688	0.942727
MIMAT0004855	mmu-miR-876-3p	miRNA	0.0502757	0.438825	0.455903	0.651311	0.940964
MIMAT0000155	mmu-miR-142-3p	miRNA	0.0501084	0.444418	0.510875	0.612686	0.936703
MIMAT0003377	mmu-miR-302d-3p	miRNA	0.0499411	0.572813	0.349056	0.729165	0.9566
MIMAT0004856	mmu-miR-105	miRNA	0.0498738	0.54805	0.42584	0.672865	0.94567
MIMAT0002107	mmu-miR-466a-3p	miRNA	0.0498562	0.62404	0.342345	0.734165	0.9566
MIMAT0004880	mmu-miR-466e-3p	miRNA	0.0498562	0.62404	0.342345	0.734165	0.9566
MIMAT0004883	mmu-miR-466g	miRNA	0.0493925	0.134724	0.443454	0.660201	0.942727
MIMAT0029857	mmu-miR-7674-3p	miRNA	0.0492732	0.571868	0.325474	0.746784	0.9566
MIMAT0027714	mmu-miR-6907-5p	miRNA	0.049126	0.597741	0.355554	0.724336	0.9566
MIMAT0014915	mmu-miR-3097-5p	miRNA	0.0488942	0.815625	0.295008	0.769753	0.963458
MIMAT0019345	mmu-miR-1843b-5p	miRNA	0.0488356	0.404551	0.433525	0.667328	0.945071
MIMAT0027706	mmu-miR-6903-5p	miRNA	0.0485951	0.515146	0.349834	0.728586	0.9566
MIMAT0004821	mmu-miR-671-3p	miRNA	0.0482859	0.558992	0.36372	0.718282	0.9566
MIMAT0029817	mmu-miR-7655-3p	miRNA	0.0480702	0.674649	0.318277	0.75219	0.958886
MIMAT0027723	mmu-miR-6911-3p	miRNA	0.047136	0.531346	0.34559	0.731745	0.9566
MIMAT0001533	mmu-miR-448-3p	miRNA	0.0469139	0.683034	0.345339	0.731932	0.9566
MIMAT0029855	mmu-miR-3569-3p	miRNA	0.0469033	0.403666	0.301932	0.764513	0.961854
MIMAT0031408	mmu-miR-8104	miRNA	0.0467284	0.340109	0.387547	0.700728	0.949725
MIMAT0028041	mmu-miR-6769b-3p	miRNA	0.0466431	0.56694	0.216423	0.829931	0.968879
MIMAT0014924	mmu-miR-344e-3p	miRNA	0.0462212	0.514881	0.366314	0.716363	0.9566
MIMAT0025107	mmu-miR-6363	miRNA	0.046067	0.421443	0.332781	0.74131	0.9566
MIMAT0014807	mmu-miR-344d-3-5p	miRNA	0.0459586	0.370185	0.314218	0.755245	0.958886
MIMAT0014955	mmu-miR-3112-5p	miRNA	0.045777	0.680457	0.310034	0.758397	0.960082
MIMAT0003452	mmu-miR-678	miRNA	0.0456832	0.589123	0.261296	0.795415	0.96752
MIMAT0027756	mmu-miR-6928-5p	miRNA	0.0456663	0.485655	0.314079	0.755349	0.958886
MIMAT0017051	mmu-miR-100-3p	miRNA	0.0452229	0.283831	0.445211	0.658944	0.942727
MIMAT0027855	mmu-miR-6976-3p	miRNA	0.0452149	0.690899	0.27413	0.785616	0.96752
MIMAT0028056	mmu-miR-7075-5p	miRNA	0.0450819	0.391954	0.330678	0.742884	0.9566
MIMAT0000239	mmu-miR-206-3p	miRNA	0.0447633	0.243066	0.37476	0.710129	0.955625
MIMAT0027899	mmu-miR-6998-3p	miRNA	0.0445721	0.67251	0.329026	0.744121	0.9566
MIMAT0004529	mmu-miR-125b-2-3p	miRNA	0.0441268	0.30521	0.383842	0.703447	0.951573
MIMAT0028443	mmu-miR-7237-3p	miRNA	0.0440968	0.403341	0.340824	0.735299	0.9566
MIMAT0029841	mmu-miR-7667-3p	miRNA	0.0439427	0.162703	0.397969	0.693101	0.949344
MIMAT0000225	mmu-miR-195a-5p	miRNA	0.0435333	1.07674	0.0680783	0.946116	0.984947
MIMAT0027738	mmu-miR-6919-5p	miRNA	0.043436	0.340301	0.31538	0.754369	0.958886
MIMAT0027699	mmu-miR-6899-3p	miRNA	0.0433107	0.336952	0.351642	0.727241	0.9566
MIMAT0004577	mmu-miR-299a-3p	miRNA	0.0432562	0.807833	0.248367	0.805321	0.96752
MIMAT0029892	mmu-miR-219c-5p	miRNA	0.0430907	0.585404	0.305635	0.761716	0.960596
MIMAT0016986	mmu-miR-137-5p	miRNA	0.0424699	0.271418	0.332559	0.741476	0.9566
MIMAT0004539	mmu-miR-183-3p	miRNA	0.0418531	0.519452	0.307792	0.760088	0.960322
MIMAT0000744	mmu-miR-380-5p	miRNA	0.0417035	0.354746	0.325345	0.746882	0.9566
MIMAT0004886	mmu-miR-467d-5p	miRNA	0.0416879	0.496333	0.282138	0.77952	0.965168
MIMAT0014957	mmu-miR-1912-5p	miRNA	0.0415555	0.434636	0.359378	0.721499	0.9566
MIMAT0000517	mmu-miR-192-5p	miRNA	0.0413782	0.799626	0.243897	0.808752	0.96801
MIMAT0004753	mmu-miR-431-3p	miRNA	0.0413447	0.455765	0.307604	0.76023	0.960322
MIMAT0022382	mmu-miR-5626-3p	miRNA	0.0412597	0.450032	0.354789	0.724903	0.9566
MIMAT0028081	mmu-miR-7087-3p	miRNA	0.0411869	0.440942	0.336452	0.738565	0.9566
MIMAT0005840	mmu-miR-669i	miRNA	0.0409714	0.754418	0.193444	0.847743	0.974982
MIMAT0009392	mmu-miR-1929-5p	miRNA	0.0405936	0.763291	0.218092	0.82864	0.968879
MIMAT0004888	mmu-miR-493-3p	miRNA	0.0402015	0.143788	0.405273	0.687774	0.947732
MIMAT0004827	mmu-miR-297b-3p	miRNA	0.0400781	0.365309	0.334959	0.73968	0.9566
MIMAT0004864	mmu-miR-297a-3p	miRNA	0.0400781	0.365309	0.334959	0.73968	0.9566
MIMAT0004866	mmu-miR-297c-3p	miRNA	0.0400781	0.365309	0.334959	0.73968	0.9566
MIMAT0003494	mmu-miR-704	miRNA	0.0398578	0.425149	0.298319	0.767246	0.962951
MIMAT0005851	mmu-miR-1193-3p	miRNA	0.0391669	0.575687	0.280834	0.780512	0.965765
MIMAT0028025	mmu-miR-7060-3p	miRNA	0.0386052	0.0571746	0.361818	0.719691	0.9566
MIMAT0028134	mmu-miR-7118-3p	miRNA	0.0384895	0.617977	0.241308	0.810742	0.968493
MIMAT0003738	mmu-miR-496a-3p	miRNA	0.0382916	0.723951	0.189259	0.850997	0.976218
MIMAT0014875	mmu-miR-3083-3p	miRNA	0.038031	0.522028	0.252957	0.8018	0.96752
MIMAT0027751	mmu-miR-6925-3p	miRNA	0.0379756	0.483264	0.293937	0.770564	0.963458
MIMAT0027808	mmu-miR-6954-5p	miRNA	0.0379198	1.89349	0.0696376	0.944883	0.984947
MIMAT0000661	mmu-miR-214-3p	miRNA	0.0378912	0.573169	0.211901	0.833429	0.968879
MIMAT0027847	mmu-miR-6972-3p	miRNA	0.0378771	0.136568	0.307237	0.760506	0.960322
MIMAT0004892	mmu-miR-568	miRNA	0.0378214	0.547082	0.312205	0.756761	0.959567
MIMAT0003466	mmu-miR-687	miRNA	0.0377426	0.153308	0.368369	0.714845	0.9566
MIMAT0025084	mmu-miR-6341	miRNA	0.0376686	0.285999	0.325146	0.747031	0.9566
MIMAT0000659	mmu-miR-212-3p	miRNA	0.0376671	0.492439	0.215509	0.830637	0.968879
MIMAT0003471	mmu-miR-692	miRNA	0.0371987	0.38303	0.235349	0.815327	0.968493
MIMAT0031402	mmu-miR-142b	miRNA	0.0367788	0.523945	0.263672	0.793598	0.96752
MIMAT0000674	mmu-miR-181c-5p	miRNA	0.0363566	0.72329	0.246472	0.806775	0.96752
MIMAT0000127	mmu-miR-29b-3p	miRNA	0.0358325	0.445474	0.360715	0.720508	0.9566
MIMAT0004665	mmu-miR-218-1-3p	miRNA	0.0357817	0.218421	0.249413	0.804518	0.96752
MIMAT0027817	mmu-miR-6958-3p	miRNA	0.0348693	0.30066	0.402785	0.689587	0.947732
MIMAT0029838	mmu-miR-7666-5p	miRNA	0.0346884	0.298946	0.257077	0.798643	0.96752
MIMAT0028096	mmu-miR-7094b-2-5p	miRNA	0.0344889	0.628282	0.242809	0.809589	0.96801
MIMAT0019349	mmu-miR-101c	miRNA	0.0337059	0.45217	0.226952	0.821798	0.968493
MIMAT0025147	mmu-miR-6396	miRNA	0.0334568	0.714499	0.16871	0.867008	0.97979
MIMAT0028434	mmu-miR-7233-5p	miRNA	0.0333513	0.298965	0.266993	0.791061	0.96752
MIMAT0007874	mmu-miR-1904	miRNA	0.0330896	0.536167	0.250525	0.803665	0.96752
MIMAT0014864	mmu-miR-3078-5p	miRNA	0.0330179	0.721028	0.200243	0.842464	0.974195
MIMAT0027981	mmu-miR-7038-3p	miRNA	0.0327742	0.468322	0.2329	0.817213	0.968493
MIMAT0027980	mmu-miR-7038-5p	miRNA	0.0326158	0.549348	0.21411	0.831719	0.968879
MIMAT0014859	mmu-miR-3075-3p	miRNA	0.032514	0.677174	0.218331	0.828455	0.968879
MIMAT0003894	mmu-miR-764-5p	miRNA	0.0321809	0.524812	0.242639	0.809719	0.96801
MIMAT0014811	mmu-miR-3059-5p	miRNA	0.0318982	0.947982	0.14836	0.882921	0.983312
MIMAT0014866	mmu-miR-3079-5p	miRNA	0.031626	0.212198	0.29307	0.771221	0.963488
MIMAT0031421	mmu-miR-8115	miRNA	0.0315625	0.547909	0.179599	0.858516	0.97813
MIMAT0017024	mmu-miR-103-1-5p	miRNA	0.0314594	0.233415	0.190025	0.850401	0.976218
MIMAT0003898	mmu-miR-760-3p	miRNA	0.0312184	0.564501	0.206582	0.837548	0.970274
MIMAT0028049	mmu-miR-7071-3p	miRNA	0.031112	0.367645	0.227437	0.821424	0.968493
MIMAT0022986	mmu-miR-3572-5p	miRNA	0.0309807	1.11017	0.106001	0.916194	0.983312
MIMAT0003460	mmu-miR-449c-5p	miRNA	0.0308419	0.444635	0.221985	0.825632	0.968879
MIMAT0029852	mmu-miR-7673-5p	miRNA	0.0307932	0.473751	0.289243	0.774123	0.963488
MIMAT0009442	mmu-miR-1969	miRNA	0.0307372	0.301978	0.239219	0.812349	0.968493
MIMAT0004879	mmu-miR-466e-5p	miRNA	0.0305192	0.382799	0.248764	0.805016	0.96752
MIMAT0003741	mmu-miR-674-3p	miRNA	0.0304581	0.629129	0.206966	0.837251	0.970274
MIMAT0004547	mmu-miR-203-5p	miRNA	0.0301468	0.38141	0.176956	0.860576	0.97813
MIMAT0031411	mmu-miR-8106	miRNA	0.0297636	0.541318	0.211953	0.833389	0.968879
MIMAT0028427	mmu-miR-7229-3p	miRNA	0.0296106	0.246358	0.259319	0.796928	0.96752
MIMAT0000368	mmu-miR-291a-3p	miRNA	0.0295449	0.384642	0.237426	0.813728	0.968493
MIMAT0025179	mmu-miR-30f	miRNA	0.029187	0.523173	0.271329	0.787752	0.96752
MIMAT0011215	mmu-miR-2139	miRNA	0.0291843	0.434757	0.246846	0.806487	0.96752
MIMAT0031390	mmu-miR-3473f	miRNA	0.0290723	0.310768	0.279508	0.781521	0.965765
MIMAT0025584	mmu-miR-6539	miRNA	0.028879	0.313945	0.228061	0.820943	0.968493
MIMAT0009395	mmu-miR-1932	miRNA	0.0288579	0.824635	0.152109	0.879986	0.982453
MIMAT0012773	mmu-miR-767	miRNA	0.0283693	0.495499	0.250786	0.803464	0.96752
MIMAT0017067	mmu-miR-181b-1-3p	miRNA	0.0278035	0.385633	0.221352	0.826121	0.968879
MIMAT0014896	mmu-miR-3087-3p	miRNA	0.0274012	0.664112	0.189726	0.850634	0.976218
MIMAT0014829	mmu-miR-3061-3p	miRNA	0.0273807	0.331688	0.219296	0.827709	0.968879
MIMAT0027882	mmu-miR-6990-5p	miRNA	0.0273425	0.282412	0.177879	0.859857	0.97813
MIMAT0003504	mmu-miR-713	miRNA	0.0273069	0.264957	0.235967	0.814851	0.968493
MIMAT0027749	mmu-miR-6924-3p	miRNA	0.0272114	0.641879	0.126902	0.899753	0.983312
MIMAT0027957	mmu-miR-7026-3p	miRNA	0.0266444	0.520849	0.189891	0.850506	0.976218
MIMAT0025077	mmu-miR-6335	miRNA	0.0262081	0.040635	0.294251	0.770326	0.963458
MIMAT0022715	mmu-miR-449c-3p	miRNA	0.0262046	0.406008	0.227036	0.821733	0.968493
MIMAT0028062	mmu-miR-7078-5p	miRNA	0.0256487	0.556465	0.193627	0.847601	0.974982
MIMAT0022379	mmu-miR-5625-5p	miRNA	0.0256326	0.673186	0.154683	0.877971	0.982453
MIMAT0003730	mmu-miR-592-5p	miRNA	0.0256102	0.200049	0.223667	0.824333	0.968879
MIMAT0028428	mmu-miR-7230-5p	miRNA	0.02528	0.203637	0.196177	0.84562	0.974982
MIMAT0014947	mmu-miR-3108-5p	miRNA	0.0250833	0.5632	0.168028	0.86754	0.97979
MIMAT0014884	mmu-miR-669d-2-3p	miRNA	0.0249913	0.203017	0.220384	0.826869	0.968879
MIMAT0028394	mmu-miR-7213-5p	miRNA	0.024598	0.205109	0.254056	0.800958	0.96752
MIMAT0028433	mmu-miR-7232-3p	miRNA	0.0243559	0.698481	0.166983	0.868357	0.97979
MIMAT0027694	mmu-miR-6897-5p	miRNA	0.0242323	0.528064	0.154119	0.878412	0.982453
MIMAT0004666	mmu-miR-33-3p	miRNA	0.0240677	0.387335	0.145854	0.884884	0.983312
MIMAT0004664	mmu-miR-214-5p	miRNA	0.0240674	0.563704	0.156105	0.876859	0.982453
MIMAT0027987	mmu-miR-7041-3p	miRNA	0.023739	0.665405	0.130085	0.897253	0.983312
MIMAT0009439	mmu-miR-1966-5p	miRNA	0.0233553	0.650593	0.167315	0.868098	0.97979
MIMAT0029901	mmu-miR-290b-3p	miRNA	0.0227387	0.51578	0.184607	0.854616	0.976411
MIMAT0027974	mmu-miR-7035-5p	miRNA	0.0225594	0.618882	0.114762	0.909298	0.983312
MIMAT0004852	mmu-miR-190b-5p	miRNA	0.0225562	0.354259	0.186797	0.852912	0.976218
MIMAT0004865	mmu-miR-297c-5p	miRNA	0.0224071	0.676814	0.156819	0.8763	0.982453
MIMAT0027947	mmu-miR-7021-3p	miRNA	0.0220185	0.135228	0.187011	0.852745	0.976218
MIMAT0004578	mmu-miR-300-5p	miRNA	0.021762	0.385094	0.154949	0.877763	0.982453
MIMAT0014819	mmu-miR-344d-1-5p	miRNA	0.0216668	0.57031	0.13754	0.891402	0.983312
MIMAT0029837	mmu-miR-7665-3p	miRNA	0.0209649	0.508332	0.110368	0.912756	0.983312
MIMAT0014851	mmu-miR-3071-3p	miRNA	0.0209265	0.705887	0.1233	0.902584	0.983312
MIMAT0016989	mmu-miR-146a-3p	miRNA	0.0205882	0.403952	0.176754	0.860734	0.97813
MIMAT0003512	mmu-miR-450b-3p	miRNA	0.0202049	0.512674	0.141166	0.888559	0.983312
MIMAT0029798	mmu-miR-7648-5p	miRNA	0.0199278	0.826687	0.118941	0.906011	0.983312
MIMAT0029908	mmu-miR-7689-5p	miRNA	0.0197697	0.384081	0.14257	0.887458	0.983312
MIMAT0003387	mmu-miR-376a-5p	miRNA	0.0194652	0.670753	0.159859	0.873922	0.982453
MIMAT0003449	mmu-miR-488-5p	miRNA	0.0193548	0.504629	0.139972	0.889495	0.983312
MIMAT0027917	mmu-miR-7006-3p	miRNA	0.0192118	0.151473	0.167689	0.867805	0.97979
MIMAT0022836	mmu-miR-299b-5p	miRNA	0.018989	0.449488	0.128193	0.898739	0.983312
MIMAT0022380	mmu-miR-5625-3p	miRNA	0.018711	0.491813	0.119001	0.905963	0.983312
MIMAT0017057	mmu-miR-320-5p	miRNA	0.0181838	0.323847	0.153247	0.879095	0.982453
MIMAT0029836	mmu-miR-7665-5p	miRNA	0.0181726	0.203766	0.118319	0.9065	0.983312
MIMAT0027879	mmu-miR-6988-3p	miRNA	0.0178873	0.42323	0.159104	0.874513	0.982453
MIMAT0028094	mmu-miR-7094-1-5p	miRNA	0.0177813	0.432283	0.135985	0.892622	0.983312
MIMAT0000740	mmu-miR-376a-3p	miRNA	0.0177807	0.409186	0.13258	0.895294	0.983312
MIMAT0027967	mmu-miR-7031-3p	miRNA	0.0169886	0.377856	0.140604	0.888999	0.983312
MIMAT0004624	mmu-miR-15a-3p	miRNA	0.0168666	0.590785	0.125941	0.900508	0.983312
MIMAT0000146	mmu-miR-134-5p	miRNA	0.0166621	0.462905	0.121583	0.903933	0.983312
MIMAT0001546	mmu-miR-450a-5p	miRNA	0.0162813	0.535923	0.105194	0.91683	0.983312
MIMAT0028018	mmu-miR-7057-5p	miRNA	0.0160747	0.0275254	0.146323	0.884517	0.983312
MIMAT0027795	mmu-miR-6947-3p	miRNA	0.0159851	0.278349	0.152915	0.879355	0.982453
MIMAT0025126	mmu-miR-6380	miRNA	0.0159393	0.497803	0.135067	0.893342	0.983312
MIMAT0024859	mmu-miR-6238	miRNA	0.0158379	1.44489	0.0275242	0.9782	0.995723
MIMAT0031426	mmu-miR-8120	miRNA	0.0158238	0.581223	0.127371	0.899385	0.983312
MIMAT0031399	mmu-miR-8097	miRNA	0.0156333	0.603904	0.108083	0.914555	0.983312
MIMAT0017234	mmu-miR-592-3p	miRNA	0.0152036	0.378001	0.136277	0.892393	0.983312
MIMAT0000374	mmu-miR-296-5p	miRNA	0.0150901	0.752202	0.0904981	0.928414	0.984947
MIMAT0029816	mmu-miR-7655-5p	miRNA	0.0149022	0.413098	0.118397	0.906439	0.983312
MIMAT0004623	mmu-let-7f-1-3p	miRNA	0.0148721	0.506339	0.125338	0.900982	0.983312
MIMAT0028015	mmu-miR-7055-3p	miRNA	0.0139551	0.446119	0.0771541	0.938946	0.984947
MIMAT0000249	mmu-miR-30e-3p	miRNA	0.0139148	0.553924	0.105475	0.916609	0.983312
MIMAT0020622	mmu-miR-5114	miRNA	0.0131275	0.68653	0.0754084	0.940325	0.984947
MIMAT0027695	mmu-miR-6897-3p	miRNA	0.0121157	0.436323	0.0731973	0.942071	0.984947
MIMAT0004790	mmu-miR-503-3p	miRNA	0.0118564	0.509738	0.0848451	0.932874	0.984947
MIMAT0014823	mmu-miR-3057-3p	miRNA	0.011697	0.646614	0.0719814	0.943032	0.984947
MIMAT0009421	mmu-miR-669o-5p	miRNA	0.0115041	0.694054	0.0684113	0.945852	0.984947
MIMAT0020631	mmu-miR-466q	miRNA	0.0114917	0.279998	0.0973713	0.922994	0.984947
MIMAT0027827	mmu-miR-6963-3p	miRNA	0.0114537	0.731346	0.063404	0.94981	0.984947
MIMAT0017037	mmu-miR-341-5p	miRNA	0.0113668	0.658255	0.0772885	0.93884	0.984947
MIMAT0017207	mmu-miR-543-5p	miRNA	0.0111235	0.106594	0.106467	0.915827	0.983312
MIMAT0028388	mmu-miR-7210-5p	miRNA	0.0110789	0.628713	0.0762204	0.939683	0.984947
MIMAT0003895	mmu-miR-764-3p	miRNA	0.0107316	0.59101	0.0669142	0.947036	0.984947
MIMAT0022987	mmu-miR-5129-3p	miRNA	0.0107097	0.5443	0.0909606	0.928049	0.984947
MIMAT0020640	mmu-miR-5129-5p	miRNA	0.0106946	0.42916	0.0792607	0.937282	0.984947
MIMAT0005440	mmu-miR-24-2-5p	miRNA	0.010676	0.69564	0.07093	0.943862	0.984947
MIMAT0017254	mmu-miR-499-3p	miRNA	0.0105148	0.441566	0.0856471	0.932241	0.984947
MIMAT0001091	mmu-miR-410-3p	miRNA	0.0103055	0.320473	0.0690669	0.945334	0.984947
MIMAT0004838	mmu-miR-742-5p	miRNA	0.0100964	0.396554	0.0821728	0.934983	0.984947
MIMAT0003474	mmu-miR-694	miRNA	0.00994475	0.526197	0.0712292	0.943626	0.984947
MIMAT0017253	mmu-miR-669c-3p	miRNA	0.00974079	0.351342	0.069313	0.94514	0.984947
MIMAT0017173	mmu-miR-412-5p	miRNA	0.00956734	0.674228	0.0631068	0.950045	0.984947
MIMAT0005855	mmu-miR-467h	miRNA	0.00937026	0.646289	0.0561989	0.955507	0.986567
MIMAT0017025	mmu-miR-103-2-5p	miRNA	0.00934413	0.587178	0.0652972	0.948314	0.984947
MIMAT0027807	mmu-miR-6953-3p	miRNA	0.00924831	0.667146	0.0673352	0.946703	0.984947
MIMAT0004845	mmu-miR-881-5p	miRNA	0.00922469	0.619612	0.0676523	0.946452	0.984947
MIMAT0002104	mmu-miR-463-5p	miRNA	0.00909788	0.574468	0.048408	0.96167	0.989146
MIMAT0017005	mmu-miR-122-3p	miRNA	0.00893053	0.201453	0.0692793	0.945167	0.984947
MIMAT0000233	mmu-miR-200b-3p	miRNA	0.00856252	0.693908	0.0561436	0.955551	0.986567
MIMAT0016999	mmu-miR-194-1-3p	miRNA	0.00828412	0.397376	0.0823801	0.93482	0.984947
MIMAT0014941	mmu-miR-3105-5p	miRNA	0.0082169	0.45887	0.0601664	0.95237	0.985958
MIMAT0025085	mmu-miR-6342	miRNA	0.00774679	0.309626	0.080403	0.93638	0.984947
MIMAT0017274	mmu-miR-466h-3p	miRNA	0.00758992	0.438403	0.0570333	0.954847	0.986567
MIMAT0000534	mmu-miR-26b-5p	miRNA	0.00750654	0.62898	0.0255117	0.979794	0.995913
MIMAT0005447	mmu-miR-449b	miRNA	0.00686554	0.42574	0.051513	0.959213	0.988113
MIMAT0005854	mmu-miR-467g	miRNA	0.0066641	0.637907	0.044747	0.964567	0.990524
MIMAT0000148	mmu-miR-136-5p	miRNA	0.00665347	0.57213	0.0506529	0.959894	0.988113
MIMAT0003458	mmu-miR-681	miRNA	0.0065786	0.471845	0.0653221	0.948294	0.984947
MIMAT0007875	mmu-miR-1898	miRNA	0.00627202	0.924215	0.0206443	0.983648	0.995913
MIMAT0004527	mmu-miR-124-5p	miRNA	0.00576164	0.521814	0.0358185	0.971633	0.994342
MIMAT0004891	mmu-miR-509-3p	miRNA	0.0044508	0.410501	0.0335516	0.973428	0.994342
MIMAT0027710	mmu-miR-6905-5p	miRNA	0.00443713	0.624739	0.0309945	0.975452	0.994342
MIMAT0028420	mmu-miR-7226-5p	miRNA	0.00434356	0.411968	0.0348638	0.972389	0.994342
MIMAT0005294	mmu-miR-467e-3p	miRNA	0.00426583	0.528888	0.0315996	0.974973	0.994342
MIMAT0014932	mmu-miR-344f-3p	miRNA	0.00383548	0.988114	0.0198268	0.984296	0.995913
MIMAT0004848	mmu-miR-883a-5p	miRNA	0.00368225	0.56367	0.0236378	0.981277	0.995913
MIMAT0027707	mmu-miR-6903-3p	miRNA	0.00368	0.606816	0.0245522	0.980553	0.995913
MIMAT0029806	mmu-miR-219b-5p	miRNA	0.00298048	0.421674	0.026025	0.979387	0.995913
MIMAT0028448	mmu-miR-7240-5p	miRNA	0.00294544	0.595043	0.0224553	0.982214	0.995913
MIMAT0031392	mmu-miR-8091	miRNA	0.00280127	0.668966	0.0163279	0.987067	0.9962
MIMAT0005444	mmu-miR-218-2-3p	miRNA	0.00245003	0.555359	0.0205863	0.983694	0.995913
MIMAT0027997	mmu-miR-7046-3p	miRNA	0.00243613	0.736749	0.0133359	0.989437	0.9962
MIMAT0004896	mmu-miR-590-3p	miRNA	0.00230824	0.718081	0.0112458	0.991092	0.9962
MIMAT0017232	mmu-miR-301b-5p	miRNA	0.00218763	0.549296	0.0181122	0.985653	0.996095
MIMAT0017170	mmu-miR-196b-3p	miRNA	0.00198198	0.675434	0.00958462	0.992408	0.9962
MIMAT0027804	mmu-miR-6952-5p	miRNA	0.00188905	1.04135	0.00570955	0.995477	0.998093
MIMAT0028017	mmu-miR-7056-3p	miRNA	0.00154303	0.541995	0.0110776	0.991225	0.9962
MIMAT0025094	mmu-miR-6351	miRNA	0.00146562	0.243688	0.0105121	0.991673	0.9962
MIMAT0025118	mmu-miR-6374	miRNA	0.00106397	0.420122	0.00834142	0.993393	0.996526
MIMAT0017176	mmu-miR-448-5p	miRNA	0.000236106	0.30008	0.00201688	0.998402	0.999099
MIMAT0014873	mmu-miR-3082-3p	miRNA	0.000212101	0.250989	0.00179852	0.998575	0.999099
MIMAT0012772	mmu-miR-599	miRNA	-0.000144144	0.422586	-0.00111406	0.999118	0.999118
MIMAT0017180	mmu-miR-449a-3p	miRNA	-0.000226015	0.123268	-0.0021367	0.998307	0.999099
MIMAT0020608	mmu-miR-5101	miRNA	-0.000431052	0.325453	-0.00314143	0.997512	0.999099
MIMAT0027736	mmu-miR-6918-5p	miRNA	-0.00139753	0.33656	-0.00950918	0.992468	0.9962
MIMAT0017082	mmu-miR-383-3p	miRNA	-0.00149793	0.67951	-0.00995086	0.992118	0.9962
MIMAT0020628	mmu-miR-5120	miRNA	-0.00172978	0.788286	-0.00941058	0.992546	0.9962
MIMAT0031415	mmu-miR-8109	miRNA	-0.00177551	0.495534	-0.0103253	0.991821	0.9962
MIMAT0028436	mmu-miR-7234-5p	miRNA	-0.00198011	0.357769	-0.0185984	0.985268	0.996095
MIMAT0014917	mmu-miR-3098-5p	miRNA	-0.00198748	0.194929	-0.0170844	0.986468	0.9962
MIMAT0017048	mmu-miR-107-5p	miRNA	-0.00261862	0.172421	-0.0211404	0.983255	0.995913
MIMAT0028058	mmu-miR-7076-5p	miRNA	-0.00287248	0.88431	-0.0123029	0.990255	0.9962
MIMAT0000208	mmu-miR-10b-5p	miRNA	-0.00316876	0.655305	-0.0196579	0.984429	0.995913
MIMAT0019344	mmu-miR-3964	miRNA	-0.0033441	0.161971	-0.0228086	0.981934	0.995913
MIMAT0027721	mmu-miR-6910-3p	miRNA	-0.00434408	0.550677	-0.0339916	0.973079	0.994342
MIMAT0027909	mmu-miR-6973b-3p	miRNA	-0.00453202	0.502869	-0.0351022	0.9722	0.994342
MIMAT0025173	mmu-miR-6418-5p	miRNA	-0.00462285	0.575694	-0.0271435	0.978501	0.995723
MIMAT0028401	mmu-miR-7216-3p	miRNA	-0.0046901	0.506106	-0.0303259	0.975982	0.994342
MIMAT0000380	mmu-miR-302a-3p	miRNA	-0.00475077	0.542649	-0.0303724	0.975945	0.994342
MIMAT0017275	mmu-miR-467c-3p	miRNA	-0.00554625	0.528651	-0.0314415	0.975098	0.994342
MIMAT0029820	mmu-miR-7657-5p	miRNA	-0.00562397	0.346871	-0.0513371	0.959352	0.988113
MIMAT0016992	mmu-miR-153-5p	miRNA	-0.00578484	0.783393	-0.0332824	0.973641	0.994342
MIMAT0000544	mmu-miR-129-2-3p	miRNA	-0.00592607	0.580245	-0.0368471	0.970819	0.994342
MIMAT0017172	mmu-miR-410-5p	miRNA	-0.00625606	0.512286	-0.0581486	0.953965	0.986567
MIMAT0003725	mmu-miR-675-5p	miRNA	-0.00652595	0.420963	-0.0464887	0.963188	0.989641
MIMAT0014809	mmu-miR-1298-5p	miRNA	-0.00688473	0.410539	-0.0554365	0.95611	0.986567
MIMAT0022355	mmu-miR-5615-5p	miRNA	-0.00724094	0.308565	-0.0627084	0.95036	0.984947
MIMAT0014886	mmu-miR-466o-3p	miRNA	-0.00755162	0.412524	-0.054846	0.956577	0.986567
MIMAT0009434	mmu-miR-1961	miRNA	-0.00761725	0.586832	-0.0559222	0.955726	0.986567
MIMAT0017047	mmu-miR-1a-2-5p	miRNA	-0.00792942	0.287649	-0.0713204	0.943554	0.984947
MIMAT0027942	mmu-miR-7019-5p	miRNA	-0.00801966	0.796804	-0.0301734	0.976102	0.994342
MIMAT0004631	mmu-miR-29a-5p	miRNA	-0.00834619	0.665033	-0.0472475	0.962588	0.989557
MIMAT0014921	mmu-miR-3101-5p	miRNA	-0.0084059	0.70603	-0.0404156	0.967994	0.993509
MIMAT0014960	mmu-miR-3113-3p	miRNA	-0.00889234	0.43712	-0.0634992	0.949735	0.984947
MIMAT0028087	mmu-miR-7090-3p	miRNA	-0.00899453	0.354257	-0.0646645	0.948814	0.984947
MIMAT0015641	mmu-miR-3470b	miRNA	-0.00919876	0.440445	-0.0647064	0.948781	0.984947
MIMAT0027977	mmu-miR-7036-3p	miRNA	-0.00940147	0.54024	-0.0675931	0.946499	0.984947
MIMAT0005853	mmu-miR-669e-5p	miRNA	-0.00967378	0.709538	-0.0503322	0.960147	0.988113
MIMAT0014826	mmu-miR-3060-5p	miRNA	-0.00993992	0.611517	-0.0759835	0.93987	0.984947
MIMAT0027925	mmu-miR-7010-3p	miRNA	-0.0099624	0.305111	-0.0806929	0.936152	0.984947
MIMAT0017214	mmu-miR-367-5p	miRNA	-0.0100819	0.347249	-0.095956	0.92411	0.984947
MIMAT0027833	mmu-miR-3547-3p	miRNA	-0.0101554	0.331311	-0.0877521	0.93058	0.984947
MIMAT0027766	mmu-miR-6933-5p	miRNA	-0.0102291	0.554624	-0.0613028	0.951471	0.985563
MIMAT0025091	mmu-miR-6348	miRNA	-0.010521	0.378074	-0.081079	0.935847	0.984947
MIMAT0020638	mmu-miR-5127	miRNA	-0.010689	0.643624	-0.0679968	0.94618	0.984947
MIMAT0000769	mmu-miR-133b-3p	miRNA	-0.0112	0.321388	-0.0766559	0.939339	0.984947
MIMAT0003515	mmu-miR-721	miRNA	-0.0112113	0.446677	-0.0721787	0.942876	0.984947
MIMAT0027854	mmu-miR-6976-5p	miRNA	-0.0113391	0.438596	-0.119222	0.90579	0.983312
MIMAT0004939	mmu-miR-208b-3p	miRNA	-0.0113914	0.450658	-0.0933294	0.926181	0.984947
MIMAT0028079	mmu-miR-7086-3p	miRNA	-0.0120358	0.291047	-0.110989	0.912267	0.983312
MIMAT0017267	mmu-miR-190b-3p	miRNA	-0.0122594	0.523845	-0.0870965	0.931097	0.984947
MIMAT0017182	mmu-miR-450a-1-3p	miRNA	-0.0125069	0.604742	-0.106015	0.916183	0.983312
MIMAT0029829	mmu-miR-7661-3p	miRNA	-0.0125588	0.658916	-0.0985129	0.922094	0.984947
MIMAT0025153	mmu-miR-6401	miRNA	-0.0126442	0.469646	-0.100206	0.92076	0.984947
MIMAT0003480	mmu-miR-297b-5p	miRNA	-0.0126676	0.265265	-0.114766	0.909295	0.983312
MIMAT0028000	mmu-miR-7048-5p	miRNA	-0.0126996	1.01675	-0.032238	0.974468	0.994342
MIMAT0012774	mmu-miR-664-3p	miRNA	-0.0127628	0.461499	-0.0835194	0.93392	0.984947
MIMAT0004632	mmu-miR-29c-5p	miRNA	-0.013035	0.446651	-0.11093	0.912314	0.983312
MIMAT0028022	mmu-miR-7059-5p	miRNA	-0.0132669	0.66525	-0.0703414	0.944327	0.984947
MIMAT0029835	mmu-miR-7664-3p	miRNA	-0.0137889	0.197417	-0.111929	0.911527	0.983312
MIMAT0005860	mmu-miR-1199-5p	miRNA	-0.0139314	0.301134	-0.121098	0.904315	0.983312
MIMAT0014800	mmu-miR-1247-5p	miRNA	-0.0140657	0.366857	-0.116697	0.907775	0.983312
MIMAT0000238	mmu-miR-205-5p	miRNA	-0.0143566	0.656782	-0.0957273	0.92429	0.984947
MIMAT0004640	mmu-miR-325-3p	miRNA	-0.0144881	0.555657	-0.118157	0.906627	0.983312
MIMAT0004237	mmu-miR-742-3p	miRNA	-0.0149855	0.680528	-0.103173	0.918422	0.983361
MIMAT0028093	mmu-miR-7093-3p	miRNA	-0.0150747	0.275644	-0.148929	0.882475	0.983312
MIMAT0029813	mmu-miR-7653-3p	miRNA	-0.01511	0.582185	-0.0745144	0.941031	0.984947
MIMAT0004760	mmu-miR-470-3p	miRNA	-0.0151732	0.7044	-0.0779007	0.938356	0.984947
MIMAT0027741	mmu-miR-6920-3p	miRNA	-0.0154459	0.652035	-0.0828881	0.934419	0.984947
MIMAT0017179	mmu-miR-365-2-5p	miRNA	-0.0157012	0.437055	-0.0902684	0.928595	0.984947
MIMAT0029861	mmu-miR-7676-3p	miRNA	-0.0157398	0.325841	-0.129014	0.898094	0.983312
MIMAT0022377	mmu-miR-5624-5p	miRNA	-0.0158568	0.574919	-0.106372	0.915902	0.983312
MIMAT0000521	mmu-let-7a-5p	miRNA	-0.0159962	5.40032	-0.00984326	0.992203	0.9962
MIMAT0016981	mmu-miR-99a-3p	miRNA	-0.0160462	0.424815	-0.127285	0.899452	0.983312
MIMAT0028035	mmu-miR-7065-3p	miRNA	-0.0161506	0.421102	-0.123616	0.902335	0.983312
MIMAT0017323	mmu-miR-669k-5p	miRNA	-0.016594	0.416522	-0.11528	0.908891	0.983312
MIMAT0029900	mmu-miR-290b-5p	miRNA	-0.0173036	0.194152	-0.188019	0.851961	0.976218
MIMAT0014860	mmu-miR-3076-5p	miRNA	-0.0173801	0.474213	-0.113134	0.910579	0.983312
MIMAT0028441	mmu-miR-7236-3p	miRNA	-0.017991	0.67985	-0.122209	0.903442	0.983312
MIMAT0027861	mmu-miR-6979-3p	miRNA	-0.0186601	0.332552	-0.138235	0.890857	0.983312
MIMAT0000665	mmu-miR-223-3p	miRNA	-0.0189915	0.737693	-0.0852502	0.932554	0.984947
MIMAT0004789	mmu-miR-450a-2-3p	miRNA	-0.0196197	0.704772	-0.137101	0.891746	0.983312
MIMAT0027951	mmu-miR-7023-3p	miRNA	-0.0198108	0.396158	-0.104141	0.91766	0.983361
MIMAT0027773	mmu-miR-6936-3p	miRNA	-0.0201238	0.643764	-0.115377	0.908814	0.983312
MIMAT0022364	mmu-miR-5618-3p	miRNA	-0.0202198	0.357118	-0.130033	0.897294	0.983312
MIMAT0003457	mmu-miR-680	miRNA	-0.020313	0.62087	-0.129887	0.897408	0.983312
MIMAT0027822	mmu-miR-6961-5p	miRNA	-0.0203284	0.549576	-0.153842	0.878629	0.982453
MIMAT0004620	mmu-let-7a-1-3p	miRNA	-0.0204368	0.29156	-0.193947	0.847353	0.974982
MIMAT0005439	mmu-let-7c-2-3p	miRNA	-0.0204368	0.29156	-0.193947	0.847353	0.974982
MIMAT0000378	mmu-miR-300-3p	miRNA	-0.020755	0.488035	-0.1973	0.844749	0.974982
MIMAT0017014	mmu-miR-208a-5p	miRNA	-0.0214034	0.489956	-0.177307	0.860302	0.97813
MIMAT0014948	mmu-miR-3108-3p	miRNA	-0.0217847	0.399868	-0.197174	0.844846	0.974982
MIMAT0031400	mmu-miR-8098	miRNA	-0.0220404	0.336729	-0.234241	0.81618	0.968493
MIMAT0027799	mmu-miR-6949-3p	miRNA	-0.0220666	0.91929	-0.13539	0.893089	0.983312
MIMAT0014872	mmu-miR-3082-5p	miRNA	-0.0226686	1.13066	-0.0764223	0.939524	0.984947
MIMAT0017250	mmu-miR-669b-3p	miRNA	-0.0230254	0.463266	-0.18315	0.855751	0.976827
MIMAT0028083	mmu-miR-7088-3p	miRNA	-0.0231145	0.85098	-0.146692	0.884228	0.983312
MIMAT0003467	mmu-miR-688	miRNA	-0.0235258	0.477972	-0.185336	0.854048	0.976348
MIMAT0014925	mmu-miR-344b-5p	miRNA	-0.0239553	0.608803	-0.137671	0.891299	0.983312
MIMAT0027937	mmu-miR-7016-3p	miRNA	-0.0248293	0.452855	-0.121863	0.903713	0.983312
MIMAT0000215	mmu-miR-186-5p	miRNA	-0.0255624	0.412979	-0.145181	0.885411	0.983312
MIMAT0004633	mmu-miR-27a-5p	miRNA	-0.0256648	0.716192	-0.171059	0.865175	0.97979
MIMAT0003112	mmu-miR-489-3p	miRNA	-0.0257516	0.72651	-0.16757	0.867898	0.97979
MIMAT0005443	mmu-miR-181a-2-3p	miRNA	-0.0263452	0.255953	-0.23382	0.816504	0.968493
MIMAT0017276	mmu-miR-493-5p	miRNA	-0.0264398	0.276155	-0.234656	0.81586	0.968493
MIMAT0029886	mmu-miR-7683-5p	miRNA	-0.0264459	0.349245	-0.150349	0.881363	0.983312
MIMAT0004841	mmu-miR-871-5p	miRNA	-0.0265962	0.564163	-0.198835	0.843557	0.974868
MIMAT0028445	mmu-miR-7238-3p	miRNA	-0.0267456	0.682177	-0.140113	0.889384	0.983312
MIMAT0004544	mmu-miR-193a-5p	miRNA	-0.0267712	0.806793	-0.156309	0.876699	0.982453
MIMAT0025078	mmu-miR-133c	miRNA	-0.0268676	0.770896	-0.155912	0.87701	0.982453
MIMAT0003485	mmu-miR-455-5p	miRNA	-0.0270299	0.221638	-0.262859	0.79422	0.96752
MIMAT0025175	mmu-miR-6419	miRNA	-0.0272736	0.0865067	-0.237427	0.813728	0.968493
MIMAT0027796	mmu-miR-6948-5p	miRNA	-0.0273151	0.33151	-0.215763	0.830441	0.968879
MIMAT0017269	mmu-miR-147-5p	miRNA	-0.0273663	0.592919	-0.173007	0.863655	0.979302
MIMAT0028004	mmu-miR-7050-5p	miRNA	-0.0274349	0.759315	-0.152425	0.879738	0.982453
MIMAT0028406	mmu-miR-7219-5p	miRNA	-0.027588	0.475747	-0.246133	0.807035	0.96752
MIMAT0017013	mmu-miR-196a-1-3p	miRNA	-0.0276722	0.145622	-0.21076	0.834312	0.968879
MIMAT0014900	mmu-miR-3089-3p	miRNA	-0.0276748	0.351543	-0.205353	0.838501	0.970789
MIMAT0007863	mmu-miR-1902	miRNA	-0.02778	0.599051	-0.106896	0.915489	0.983312
MIMAT0027724	mmu-miR-6912-5p	miRNA	-0.0278189	0.677706	-0.0667653	0.947153	0.984947
MIMAT0029871	mmu-miR-7678-3p	miRNA	-0.0278201	0.57643	-0.221591	0.825936	0.968879
MIMAT0027963	mmu-miR-7029-3p	miRNA	-0.0278513	0.347608	-0.239278	0.812304	0.968493
MIMAT0017178	mmu-miR-429-5p	miRNA	-0.0278943	0.636782	-0.182825	0.856004	0.976827
MIMAT0027729	mmu-miR-6914-3p	miRNA	-0.0280302	0.355396	-0.236896	0.814136	0.968493
MIMAT0029887	mmu-miR-7683-3p	miRNA	-0.0281204	0.451249	-0.156036	0.876912	0.982453
MIMAT0028024	mmu-miR-7060-5p	miRNA	-0.0281683	0.572647	-0.207283	0.837005	0.970274
MIMAT0003728	mmu-miR-374b-3p	miRNA	-0.0285628	0.484036	-0.260024	0.796388	0.96752
MIMAT0027775	mmu-miR-6937-3p	miRNA	-0.028866	0.637569	-0.140276	0.889256	0.983312
MIMAT0014931	mmu-miR-344f-5p	miRNA	-0.0288816	0.420374	-0.249025	0.804815	0.96752
MIMAT0000746	mmu-miR-381-3p	miRNA	-0.029474	0.500034	-0.286491	0.776212	0.965168
MIMAT0000379	mmu-miR-301a-3p	miRNA	-0.0299242	0.169285	-0.251334	0.803044	0.96752
MIMAT0029911	mmu-miR-7243-3p	miRNA	-0.0305153	0.433603	-0.260543	0.795991	0.96752
MIMAT0029827	mmu-miR-7660-3p	miRNA	-0.0307387	0.530416	-0.226426	0.822204	0.968493
MIMAT0026642	mmu-miR-3475-5p	miRNA	-0.0314481	0.786128	-0.175526	0.861691	0.978635
MIMAT0029856	mmu-miR-7674-5p	miRNA	-0.0317003	0.53822	-0.14483	0.885686	0.983312
MIMAT0014911	mmu-miR-3095-5p	miRNA	-0.0317428	0.404063	-0.266116	0.791731	0.96752
MIMAT0000382	mmu-miR-34b-5p	miRNA	-0.0319325	0.666731	-0.239855	0.81186	0.968493
MIMAT0025093	mmu-miR-6350	miRNA	-0.0322444	0.630914	-0.22223	0.825443	0.968879
MIMAT0027945	mmu-miR-7020-3p	miRNA	-0.0322772	0.601592	-0.266201	0.791666	0.96752
MIMAT0001637	mmu-miR-452-5p	miRNA	-0.0325527	0.324708	-0.263929	0.793402	0.96752
MIMAT0000240	mmu-miR-207	miRNA	-0.0327689	0.398294	-0.2084	0.83614	0.970274
MIMAT0019356	mmu-miR-3971	miRNA	-0.0334117	0.635453	-0.253922	0.801061	0.96752
MIMAT0017344	mmu-miR-1948-5p	miRNA	-0.0345712	0.26655	-0.289262	0.774109	0.963488
MIMAT0025171	mmu-miR-6416-3p	miRNA	-0.0346959	0.601153	-0.211087	0.834059	0.968879
MIMAT0022358	mmu-miR-1231-3p	miRNA	-0.0348214	0.290034	-0.294989	0.769767	0.963458
MIMAT0000373	mmu-miR-295-3p	miRNA	-0.0349684	0.245154	-0.298688	0.766966	0.962951
MIMAT0028065	mmu-miR-7079-3p	miRNA	-0.0351255	0.321757	-0.297884	0.767575	0.962951
[truncated: 764 more rows]

## Sheet: Blood_50_ICRRF_vs_AL
Accession	Transcript.ID.Array.Design.	Sequence.Type	logFC	AveExpr	t	P.Value	adj.P.Val
[truncated: 1,908 more rows]

[truncated: 20 more sheets: Blood_50_ICRRF_vs_CCR, Blood_50_ICRR_vs_ICRRF, Blood_80_CCR_vs_AL, Blood_80_ICRR_vs_AL, Blood_80_ICRR_vs_CCR, Blood_80_ICRRF_vs_AL, Blood_80_ICRRF_vs_CCR, Blood_80_ICRR_vs_ICRRF, Blood_AL_80_vs_50, Blood_AL_80_vs_10, Blood_AL_50_vs_10, Blood_CCR_80_vs_50, Blood_CCR_80_vs_10, Blood_CCR_50_vs_10, Blood_ICRR_80_vs_50, Blood_ICRR_80_vs_10, Blood_ICRR_50_vs_10, Blood_ICRRF_80_vs_50, Blood_ICRRF_80_vs_10, Blood_ICRRF_50_vs_10]
